# Supplementary material
Source: publisher figshare collection journal article supplement (https://acs.figshare.com/ndownloader/files/6055965)
Supplement: Supplementary file 1 [file 6055965]

data_sad
_audit_creation_date              2016-08-24
_audit_creation_method
;
Olex2 1.2
(compiled 2016.02.19 svn.r3266 for OlexSys, GUI svn.r5155)
;
_publ_contact_author_address      ?
_publ_contact_author_email        ?
_publ_contact_author_name         ''
_publ_contact_author_phone        ?
_publ_section_references
;
Dolomanov, O.V., Bourhis, L.J., Gildea, R.J, Howard, J.A.K. & Puschmann, H.
 (2009), J. Appl. Cryst. 42, 339-341.

Sheldrick, G.M. (2015). Acta Cryst. C71, 3-8.
;
_chemical_name_common             ?
_chemical_name_systematic
;
 ?
;
_chemical_formula_moiety          'C138 H168 N6 O14 Zn7, 6(C3 H7 N O), C3 N O'
_chemical_formula_sum             'C159 H210 N13 O21 Zn7'
_chemical_formula_weight          3096.98
_chemical_melting_point           ?
loop_
  _atom_type_symbol
  _atom_type_description
  _atom_type_scat_dispersion_real
  _atom_type_scat_dispersion_imag
  _atom_type_scat_source
 'C' 'C' 0.0181 0.0091 'International Tables Vol C Tables 4.2.6.8 and 6.1.1.4'
 'H' 'H' 0.0000 0.0000 'International Tables Vol C Tables 4.2.6.8 and 6.1.1.4'
 'N' 'N' 0.0311 0.0180 'International Tables Vol C Tables 4.2.6.8 and 6.1.1.4'
 'O' 'O' 0.0492 0.0322 'International Tables Vol C Tables 4.2.6.8 and 6.1.1.4'
 'Zn' 'Zn' -1.5491 0.6778
 'International Tables Vol C Tables 4.2.6.8 and 6.1.1.4'

_shelx_space_group_comment
;
The symmetry employed for this shelxl refinement is uniquely defined
by the following loop, which should always be used as a source of
symmetry information in preference to the above space-group names.
They are only intended as comments.
;
_space_group_crystal_system       'monoclinic'
_space_group_IT_number            15
_space_group_name_H-M_alt         'C 1 2/c 1'
_space_group_name_Hall            '-C 2yc'
loop_
  _space_group_symop_operation_xyz
 'x, y, z'
 '-x, y, -z+1/2'
 'x+1/2, y+1/2, z'
 '-x+1/2, y+1/2, -z+1/2'
 '-x, -y, -z'
 'x, -y, z-1/2'
 '-x+1/2, -y+1/2, -z'
 'x+1/2, -y+1/2, z-1/2'

_cell_length_a                    20.7405(4)
_cell_length_b                    24.2320(5)
_cell_length_c                    32.6921(5)
_cell_angle_alpha                 90
_cell_angle_beta                  97.9990(10)
_cell_angle_gamma                 90
_cell_volume                      16270.7(5)
_cell_formula_units_Z             4
_cell_measurement_reflns_used     9995
_cell_measurement_temperature     296(2)
_cell_measurement_theta_max       57.67
_cell_measurement_theta_min       2.73
_shelx_estimated_absorpt_T_max    0.734
_shelx_estimated_absorpt_T_min    0.734
_exptl_absorpt_coefficient_mu     1.649
_exptl_absorpt_correction_T_max   ?
_exptl_absorpt_correction_T_min   ?
_exptl_absorpt_correction_type    'none'
_exptl_absorpt_process_details    ?
_exptl_absorpt_special_details    ?
_exptl_crystal_colour             yellow
_exptl_crystal_density_diffrn     1.264
_exptl_crystal_density_meas       .
_exptl_crystal_density_method     ?
_exptl_crystal_description        cubic
_exptl_crystal_F_000              6532
_exptl_crystal_size_max           0.2
_exptl_crystal_size_mid           0.2
_exptl_crystal_size_min           0.2
_exptl_special_details
;
 ?
;
_exptl_transmission_factor_max    ?
_exptl_transmission_factor_min    ?
_diffrn_reflns_av_R_equivalents   0.0234
_diffrn_reflns_av_unetI/netI      0.0280
_diffrn_reflns_Laue_measured_fraction_full 0.936
_diffrn_reflns_Laue_measured_fraction_max 0.936
_diffrn_reflns_limit_h_max        21
_diffrn_reflns_limit_h_min        -22
_diffrn_reflns_limit_k_max        25
_diffrn_reflns_limit_k_min        -17
_diffrn_reflns_limit_l_max        34
_diffrn_reflns_limit_l_min        -34
_diffrn_reflns_number             22832
_diffrn_reflns_point_group_measured_fraction_full 0.936
_diffrn_reflns_point_group_measured_fraction_max 0.936
_diffrn_reflns_theta_full         54.997
_diffrn_reflns_theta_max          54.997
_diffrn_reflns_theta_min          2.730
_diffrn_ambient_temperature       296.15
_diffrn_detector_area_resol_mean  ?
_diffrn_measured_fraction_theta_full 0.936
_diffrn_measured_fraction_theta_max 0.936
_diffrn_measurement_device_type   'CCD area detector'
_diffrn_measurement_method        'phi and omega scans'
_diffrn_radiation_monochromator   'graphite'
_diffrn_radiation_type            CuK\a
_diffrn_radiation_wavelength      1.54178
_diffrn_source                    ?
_reflns_Friedel_coverage          0.000
_reflns_Friedel_fraction_full     .
_reflns_Friedel_fraction_max      .
_reflns_number_gt                 8217
_reflns_number_total              9551
_reflns_special_details
;
 Reflections were merged by SHELXL according to the crystal
 class for the calculation of statistics and refinement.
 
 _reflns_Friedel_fraction is defined as the number of unique
 Friedel pairs measured divided by the number that would be
 possible theoretically, ignoring centric projections and
 systematic absences.
CheckCIF Alert and Discussion:

THETM01_ALERT_3_A The value of sine(theta_max)/
wavelength is less than 0.550
Calculated sin(theta_max)/wavelength = 0.5313

Discussion: A full set of data was collected, however,
the very high angle data was dominated by noise 
beacuse of the weak diffraction and so was omitted.

PLAT029_ALERT_3_A _diffrn_measured_fraction_theta_full 
value Low . 0.936 Note

Discussion: A full set of data was collected, however
 the very high angle data was dominated by noise 
beacuse of the weak diffraction and so was omitted.

PLAT220_ALERT_2_B Non-Solvent Resd 1 C Ueq(max)/Ueq(min) Range 8.0 Ratio

Discussion: We optimized the growth of the crystal, collected the data
several times and this data is the best among them, but the disorder of 
some atoms seems still very badly. We have split several tert-butyl 
groups to make  the ellipsoid of all the atoms better.It is noteworthy 
that the bond lengths and angles is in the normal range as  reported 
in the literature.

PLAT430_ALERT_2_B Short Inter D...A Contact O7 .. O8 .. 2.67 Ang.
Discussion: In this structure, O7 should be a OH group to make the 
charge neutral. So it exists a O7-H.. O8 hydrogen bond.  

 Reflections were merged by SHELXL according to the crystal
 class for the calculation of statistics and refinement.

;
_reflns_threshold_expression      'I > 2\s(I)'
_computing_cell_refinement        ?
_computing_data_collection        ?
_computing_data_reduction         ?
_computing_molecular_graphics     'Olex2 (Dolomanov et al., 2009)'
_computing_publication_material   'Olex2 (Dolomanov et al., 2009)'
_computing_structure_refinement   'ShelXL (Sheldrick, 2015)'
_computing_structure_solution     ?
_refine_diff_density_max          1.154
_refine_diff_density_min          -0.511
_refine_diff_density_rms          0.079
_refine_ls_extinction_coef        .
_refine_ls_extinction_method      none
_refine_ls_goodness_of_fit_ref    1.084
_refine_ls_hydrogen_treatment     constr
_refine_ls_matrix_type            full
_refine_ls_number_parameters      947
_refine_ls_number_reflns          9551
_refine_ls_number_restraints      349
_refine_ls_R_factor_all           0.0652
_refine_ls_R_factor_gt            0.0558
_refine_ls_restrained_S_all       1.150
_refine_ls_shift/su_max           0.015
_refine_ls_shift/su_mean          0.000
_refine_ls_structure_factor_coef  Fsqd
_refine_ls_weighting_details
'w=1/[\s^2^(Fo^2^)+(0.0860P)^2^+66.9605P] where P=(Fo^2^+2Fc^2^)/3'
_refine_ls_weighting_scheme       calc
_refine_ls_wR_factor_gt           0.1536
_refine_ls_wR_factor_ref          0.1685
_refine_special_details           ?
_olex2_refinement_description
;
1. Fixed Uiso
 At 1.2 times of:
  All C(H) groups
 At 1.5 times of:
  All C(H,H,H) groups
2. Restrained distances
 C13-C12
 2.5 with sigma of 0.02
 C60-C58
 2.5 with sigma of 0.02
 C58-C59
 2.5 with sigma of 0.02
 C59-C60
 2.5 with sigma of 0.02
 C60-C57 = C58-C57 = C59-C57
 1.51 with sigma of 0.02
 C68-C69
 3.2 with sigma of 0.02
 C12A-C13A
 2.5 with sigma of 0.02
 C60A-C58A
 2.5 with sigma of 0.02
 C59A-C58A
 2.5 with sigma of 0.02
 C60A-C59A
 2.5 with sigma of 0.02
 C57-C50
 1.53 with sigma of 0.02
 C12A-C14A
 2.5 with sigma of 0.02
 C14A-C13A
 2.5 with sigma of 0.02
 C42A-C40A
 2.5 with sigma of 0.02
 C40-C42
 2.5 with sigma of 0.02
 C41A-C42A
 2.5 with sigma of 0.02
 C41A-C40A
 2.5 with sigma of 0.02
 C42A-C39A = C40A-C39A = C41A-C39A
 1.51 with sigma of 0.02
 C41-C40
 2.5 with sigma of 0.02
 C42-C41
 2.5 with sigma of 0.02
 C42-C39 = C40-C39 = C41-C39
 1.51 with sigma of 0.02
 C58A-C57A = C59A-C57A = C60A-C57A
 1.51 with sigma of 0.02
 C57A-C50
 1.53 with sigma of 0.02
 N7-C79
 1.49 with sigma of 0.02
 C80-C79
 2.65 with sigma of 0.02
 C80-N7
 1.45 with sigma of 0.02
 N4-C72
 1.61 with sigma of 0.02
 N4-C71
 1.55 with sigma of 0.02
 N4-C70
 1.8 with sigma of 0.02
 C79-O11
 1.25 with sigma of 0.02
 O11-N7
 2.2984 with sigma of 0.02
 O10-N6
 2.6 with sigma of 0.02
 N6-O10
 2.3 with sigma of 0.02
 C14-C13
 2.5 with sigma of 0.02
 C12-C14
 2.5 with sigma of 0.02
 C3-C11
 1.53 with sigma of 0.02
 C11-C3 = C11A-C3
 1.53 with sigma of 0.02
 C13-C11 = C12-C11 = C14-C11
 1.51 with sigma of 0.02
 C12A-C11A = C12-C11 = C13-C11 = C13A-C11A = C14-C11 = C14A-C11A
 1.51 with sigma of 0.02
 N6-C78
 1.55 with sigma of 0.02
 N6-C77
 1.55 with sigma of 0.02
 N6-C76
 1.59 with sigma of 0.02
 O10-C76
 1.25 with sigma of 0.02
 C76-C77
 2.6 with sigma of 0.02
 N5-C75
 1.59 with sigma of 0.02
 N5-C74
 1.56 with sigma of 0.02
 N5-C73
 1.7 with sigma of 0.02
3. Restrained planarity
 N7, C79, C80, O11
 with sigma of 0.1
 N6, C76, C77, C78
 with sigma of 0.1
4. Rigid bond restraints
 C75, N5
 with sigma for 1-2 distances of 0.01 and sigma for 1-3 distances of 0.01
 N5, C74
 with sigma for 1-2 distances of 0.01 and sigma for 1-3 distances of 0.01
 C73, N5
 with sigma for 1-2 distances of 0.01 and sigma for 1-3 distances of 0.01
 C72, N4
 with sigma for 1-2 distances of 0.01 and sigma for 1-3 distances of 0.01
 C71, N4
 with sigma for 1-2 distances of 0.01 and sigma for 1-3 distances of 0.01
 N4, C70
 with sigma for 1-2 distances of 0.01 and sigma for 1-3 distances of 0.01
 C79, O11
 with sigma for 1-2 distances of 0.01 and sigma for 1-3 distances of 0.01
 N6, C78
 with sigma for 1-2 distances of 0.01 and sigma for 1-3 distances of 0.01
 C76, N6
 with sigma for 1-2 distances of 0.01 and sigma for 1-3 distances of 0.01
 O10, C76
 with sigma for 1-2 distances of 0.01 and sigma for 1-3 distances of 0.01
 N6, C77
 with sigma for 1-2 distances of 0.01 and sigma for 1-3 distances of 0.01
5. Uiso/Uaniso restraints and constraints
C57 \\sim C58: within 1.7A with sigma of 0.02 and sigma for terminal atoms of
0.08
C57 \\sim C59: within 1.7A with sigma of 0.02 and sigma for terminal atoms of
0.08
C57 \\sim C60: within 1.7A with sigma of 0.02 and sigma for terminal atoms of
0.08
C50 \\sim C57: within 1.7A with sigma of 0.01 and sigma for terminal atoms of
0.08
C3 \\sim C11A: within 1.7A with sigma of 0.01 and sigma for terminal atoms of
0.08
C14A \\sim C12A \\sim C13A \\sim C11A \\sim C11A \\sim C11A: within 1.7A with
sigma of 0.01 and sigma for terminal atoms of 0.08
C39 \\sim C40: within 1.7A with sigma of 0.01 and sigma for terminal atoms of
0.08
C37 \\sim C39: within 1.7A with sigma of 0.01 and sigma for terminal atoms of
0.08
C39 \\sim C42: within 1.7A with sigma of 0.01 and sigma for terminal atoms of
0.08
C41A \\sim C39A: within 1.7A with sigma of 0.01 and sigma for terminal atoms of
0.08
C39 \\sim C41: within 1.7A with sigma of 0.01 and sigma for terminal atoms of
0.08
C50 \\sim C57A: within 1.7A with sigma of 0.01 and sigma for terminal atoms of
0.08
C60A \\sim C57A: within 1.7A with sigma of 0.01 and sigma for terminal atoms of
0.08
C58A \\sim C57A: within 1.7A with sigma of 0.01 and sigma for terminal atoms of
0.08
C59A \\sim C57A: within 1.7A with sigma of 0.01 and sigma for terminal atoms of
0.08
N7 \\sim C79 \\sim C80 \\sim O11: within 1.7A with sigma of 0.04 and sigma for
terminal atoms of 0.08
O8 \\sim N4 \\sim C70 \\sim C71 \\sim C72: within 1.7A with sigma of 0.04 and
sigma for terminal atoms of 0.08
C11 \\sim C11 \\sim C11 \\sim C12 \\sim C13 \\sim C14: within 1.7A with sigma
of 0.01 and sigma for terminal atoms of 0.08
N6 \\sim C76 \\sim C77 \\sim C78 \\sim O10: within 1.7A with sigma of 0.04 and
sigma for terminal atoms of 0.08
N5 \\sim C73 \\sim C74 \\sim C75 \\sim O9: within 2A with sigma of 0.01 and
sigma for terminal atoms of 0.02
Uanis(C14A) \\sim Ueq: with sigma of 0.01 and sigma for terminal atoms of 0.02
Uanis(C14) \\sim Ueq: with sigma of 0.0001 and sigma for terminal atoms of 0.2
Uanis(C41) = Uanis(C41A)
Uanis(C42A) = Uanis(C42)
Uanis(C77) = Uanis(C78) = Uanis(C76) = Uanis(N6)
6. Rigid body (RIGU) restrains
 C57, C59
 with sigma for 1-2 distances of 0.004 and sigma for 1-3 distances of 0.004
 C57, C60
 with sigma for 1-2 distances of 0.004 and sigma for 1-3 distances of 0.004
 C57, C58
 with sigma for 1-2 distances of 0.004 and sigma for 1-3 distances of 0.004
 C50, C57
 with sigma for 1-2 distances of 0.004 and sigma for 1-3 distances of 0.004
 C12A, C11A
 with sigma for 1-2 distances of 0.004 and sigma for 1-3 distances of 0.004
 C3, C11A
 with sigma for 1-2 distances of 0.004 and sigma for 1-3 distances of 0.004
 C13A, C11A
 with sigma for 1-2 distances of 0.004 and sigma for 1-3 distances of 0.004
 C42, C42A
 with sigma for 1-2 distances of 0.004 and sigma for 1-3 distances of 0.004
 C39, C40
 with sigma for 1-2 distances of 0.001 and sigma for 1-3 distances of 0.001
 C37, C39
 with sigma for 1-2 distances of 0.001 and sigma for 1-3 distances of 0.001
 C39, C42
 with sigma for 1-2 distances of 0.001 and sigma for 1-3 distances of 0.001
 C39, C41
 with sigma for 1-2 distances of 0.001 and sigma for 1-3 distances of 0.001
 C41, C41A
 with sigma for 1-2 distances of 0.001 and sigma for 1-3 distances of 0.001
 C50, C57A
 with sigma for 1-2 distances of 0.004 and sigma for 1-3 distances of 0.004
 C60A, C57A
 with sigma for 1-2 distances of 0.004 and sigma for 1-3 distances of 0.004
 C58A, C57A
 with sigma for 1-2 distances of 0.001 and sigma for 1-3 distances of 0.001
 C59A, C57A
 with sigma for 1-2 distances of 0.001 and sigma for 1-3 distances of 0.001
 C11, C12
 with sigma for 1-2 distances of 0.004 and sigma for 1-3 distances of 0.004
 C11, C14
 with sigma for 1-2 distances of 0.001 and sigma for 1-3 distances of 0.001
7. Others
 Sof(C59A)=Sof(H59D)=Sof(H59E)=Sof(H59F)=Sof(C60A)=Sof(H60D)=Sof(H60E)=
 Sof(H60F)=Sof(C58A)=Sof(H58D)=Sof(H58E)=Sof(H58F)=Sof(C57A)=1-FVAR(1)
 Sof(C57)=Sof(C58)=Sof(H58A)=Sof(H58B)=Sof(H58C)=Sof(C59)=Sof(H59A)=Sof(H59B)=
 Sof(H59C)=Sof(C60)=Sof(H60A)=Sof(H60B)=Sof(H60C)=FVAR(1)
 Sof(C14A)=Sof(H14D)=Sof(H14E)=Sof(H14F)=Sof(C12A)=Sof(H12D)=Sof(H12E)=
 Sof(H12F)=Sof(C13A)=Sof(H13D)=Sof(H13E)=Sof(H13F)=Sof(C11A)=1-FVAR(2)
 Sof(C11)=Sof(C12)=Sof(H12A)=Sof(H12B)=Sof(H12C)=Sof(C13)=Sof(H13A)=Sof(H13B)=
 Sof(H13C)=Sof(C14)=Sof(H14A)=Sof(H14B)=Sof(H14C)=FVAR(2)
 Sof(C41A)=Sof(H41D)=Sof(H41E)=Sof(H41F)=Sof(C40A)=Sof(H40D)=Sof(H40E)=
 Sof(H40F)=Sof(C42A)=Sof(H42D)=Sof(H42E)=Sof(H42F)=Sof(C39A)=1-FVAR(3)
 Sof(C39)=Sof(C42)=Sof(H42A)=Sof(H42B)=Sof(H42C)=Sof(C41)=Sof(H41A)=Sof(H41B)=
 Sof(H41C)=Sof(C40)=Sof(H40A)=Sof(H40B)=Sof(H40C)=FVAR(3)
 Fixed Sof: N7(0.5) C79(0.5) O11(0.5)
8.a Me refined with riding coordinates:
 C8(H8A,H8B,H8C), C9(H9A,H9B,H9C), C10(H10A,H10B,H10C), C30(H30A,H30B,H30C),
 C31(H31A,H31B,H31C), C44(H44A,H44B,H44C), C45(H45A,H45B,H45C), C46(H46A,H46B,
 H46C), C54(H54A,H54B,H54C), C55(H55A,H55B,H55C), C56(H56A,H56B,H56C), C72(H72A,
 H72B,H72C), C42(H42A,H42B,H42C), C59A(H59D,H59E,H59F), C60A(H60D,H60E,H60F),
 C58A(H58D,H58E,H58F)
8.b Aromatic/amide H refined with riding coordinates:
 C2(H2), C4(H4), C15(H15), C21(H21), C27(H27), C32(H32), C36(H36), C38(H38),
 C49(H49), C51(H51), C61(H61), C67(H67), C70(H70), C73(H73), C76(H76)
8.c Fitted hexagon refined as free rotating group:
 C6(C1,C2,C3,C4,C5), C16(C17,C18,C19,C20,C21), C24(C25,C26,C27,C28,C29),
 C33(C34,C35,C36,C37,C38), C47(C48,C49,C50,C51,C52), C62(C63,C64,C65,C66,C67)
8.d Idealised Me refined as rotating group:
 C12(H12A,H12B,H12C), C13(H13A,H13B,H13C), C14(H14A,H14B,H14C), C22(H22A,H22B,
 H22C), C23(H23A,H23B,H23C), C58(H58A,H58B,H58C), C59(H59A,H59B,H59C), C60(H60A,
 H60B,H60C), C68(H68A,H68B,H68C), C69(H69A,H69B,H69C), C71(H71A,H71B,H71C),
 C74(H74A,H74B,H74C), C75(H75A,H75B,H75C), C77(H77A,H77B,H77C), C78(H78A,H78B,
 H78C), C41(H41A,H41B,H41C), C40(H40A,H40B,H40C), C14A(H14D,H14E,H14F),
 C12A(H12D,H12E,H12F), C13A(H13D,H13E,H13F), C41A(H41D,H41E,H41F), C40A(H40D,
 H40E,H40F), C42A(H42D,H42E,H42F)
;
_atom_sites_solution_hydrogens    geom
_atom_sites_solution_primary      ?
_atom_sites_solution_secondary    ?
loop_
  _atom_site_label
  _atom_site_type_symbol
  _atom_site_fract_x
  _atom_site_fract_y
  _atom_site_fract_z
  _atom_site_U_iso_or_equiv
  _atom_site_adp_type
  _atom_site_occupancy
  _atom_site_site_symmetry_order
  _atom_site_calc_flag
  _atom_site_refinement_flags_posn
  _atom_site_refinement_flags_adp
  _atom_site_refinement_flags_occupancy
  _atom_site_disorder_assembly
  _atom_site_disorder_group
 Zn1 Zn 1.0000 0.12799(3) 0.7500 0.0333(2) Uani 1 2 d S T P . .
 Zn2 Zn 0.84315(3) 0.13520(3) 0.74176(2) 0.0419(2) Uani 1 1 d . . . . .
 Zn3 Zn 0.91455(3) 0.19217(3) 0.67411(2) 0.0377(2) Uani 1 1 d . . . . .
 Zn4 Zn 0.90524(3) 0.06420(3) 0.67770(2) 0.0435(2) Uani 1 1 d . . . . .
 O1 O 0.89128(18) 0.04037(15) 0.62073(10) 0.0539(9) Uani 1 1 d . . . . .
 O2 O 0.91565(14) 0.07881(13) 0.74884(9) 0.0384(7) Uani 1 1 d . . . . .
 O3 O 1.01821(14) 0.11539(12) 0.81333(9) 0.0346(7) Uani 1 1 d . . . . .
 O4 O 1.13723(16) 0.25541(14) 0.84593(11) 0.0507(9) Uani 1 1 d . . . . .
 O5 O 0.76461(18) 0.09676(17) 0.75045(12) 0.0655(11) Uani 1 1 d . . . . .
 O6 O 0.93114(13) 0.19186(12) 0.73713(9) 0.0335(7) Uani 1 1 d . . . . .
 O7 O 0.84815(15) 0.13247(13) 0.68040(10) 0.0429(8) Uani 1 1 d . . . . .
 O8 O 0.7314(3) 0.1328(3) 0.6339(2) 0.112(2) Uani 1 1 d . U . . .
 N1 N 0.8948(2) -0.01025(18) 0.70058(12) 0.0485(11) Uani 1 1 d . . . . .
 N2 N 1.01882(18) 0.20203(16) 0.86390(11) 0.0387(9) Uani 1 1 d . . . . .
 N3 N 0.83318(18) 0.19444(17) 0.78271(12) 0.0427(10) Uani 1 1 d . . . . .
 N4 N 0.6672(3) 0.0591(3) 0.6073(2) 0.104(2) Uani 1 1 d D U . . .
 N5 N 0.6479(5) 0.2511(4) 0.7445(3) 0.144(3) Uani 1 1 d D U . . .
 N6 N 0.4992(7) 0.2999(7) 0.9660(4) 0.309(6) Uani 1 1 d D U . . .
 C6 C 0.86382(18) -0.00757(12) 0.60620(9) 0.0490(13) Uani 1 1 d . . . . .
 C1 C 0.84828(18) -0.04870(13) 0.63282(7) 0.0509(13) Uani 1 1 d G . . . .
 C2 C 0.8141(2) -0.09513(12) 0.61711(9) 0.0629(16) Uani 1 1 d G . . . .
 H2 H 0.8037 -0.1226 0.6349 0.075 Uiso 1 1 calc R . . . .
 C3 C 0.7954(2) -0.10044(13) 0.57479(10) 0.0729(18) Uani 1 1 d DG U . . .
 C4 C 0.8109(2) -0.05932(15) 0.54817(7) 0.0677(17) Uani 1 1 d G . . . .
 H4 H 0.7984 -0.0629 0.5199 0.081 Uiso 1 1 calc R . . . .
 C5 C 0.84514(19) -0.01289(13) 0.56388(8) 0.0565(14) Uani 1 1 d G . . . .
 C7 C 0.8647(3) 0.0313(3) 0.53294(16) 0.0647(16) Uani 1 1 d . . . . .
 C8 C 0.8292(4) 0.0849(3) 0.5385(2) 0.093(2) Uani 1 1 d . . . . .
 H8A H 0.7831 0.0784 0.5345 0.139 Uiso 1 1 calc R . . . .
 H8B H 0.8424 0.0988 0.5659 0.139 Uiso 1 1 calc R . . . .
 H8C H 0.8398 0.1114 0.5186 0.139 Uiso 1 1 calc R . . . .
 C9 C 0.9379(4) 0.0403(3) 0.5391(2) 0.088(2) Uani 1 1 d . . . . .
 H9A H 0.9595 0.0060 0.5355 0.133 Uiso 1 1 calc R . . . .
 H9B H 0.9490 0.0667 0.5193 0.133 Uiso 1 1 calc R . . . .
 H9C H 0.9516 0.0540 0.5665 0.133 Uiso 1 1 calc R . . . .
 C10 C 0.8469(5) 0.0130(4) 0.48748(19) 0.107(3) Uani 1 1 d . . . . .
 H10A H 0.8687 -0.0209 0.4831 0.161 Uiso 1 1 calc R . . . .
 H10B H 0.8006 0.0077 0.4815 0.161 Uiso 1 1 calc R . . . .
 H10C H 0.8601 0.0410 0.4696 0.161 Uiso 1 1 calc R . . . .
 C11 C 0.7445(8) -0.1464(6) 0.5573(4) 0.091(5) Uani 0.65(3) 1 d D U . A 1
 C12 C 0.6765(8) -0.1234(8) 0.5437(8) 0.146(8) Uani 0.65(3) 1 d D U . A 1
 H12A H 0.6789 -0.0942 0.5242 0.218 Uiso 0.65(3) 1 calc GR . . A 1
 H12B H 0.6591 -0.1093 0.5674 0.218 Uiso 0.65(3) 1 calc GR . . A 1
 H12C H 0.6488 -0.1522 0.5312 0.218 Uiso 0.65(3) 1 calc GR . . A 1
 C13 C 0.7690(14) -0.1736(9) 0.5206(6) 0.147(12) Uani 0.65(3) 1 d D U . A 1
 H13A H 0.7367 -0.1988 0.5077 0.220 Uiso 0.65(3) 1 calc GR . . A 1
 H13B H 0.8084 -0.1935 0.5299 0.220 Uiso 0.65(3) 1 calc GR . . A 1
 H13C H 0.7775 -0.1459 0.5011 0.220 Uiso 0.65(3) 1 calc GR . . A 1
 C14 C 0.7426(15) -0.1901(11) 0.5908(6) 0.205(17) Uani 0.65(3) 1 d D U . A 1
 H14A H 0.7110 -0.2178 0.5812 0.308 Uiso 0.65(3) 1 calc GR . . A 1
 H14B H 0.7309 -0.1731 0.6153 0.308 Uiso 0.65(3) 1 calc GR . . A 1
 H14C H 0.7848 -0.2069 0.5971 0.308 Uiso 0.65(3) 1 calc GR . . A 1
 C15 C 0.8672(3) -0.0500(2) 0.67722(16) 0.0536(14) Uani 1 1 d . . . . .
 H15 H 0.8590 -0.0826 0.6906 0.064 Uiso 1 1 calc R . . . .
 C16 C 0.91309(17) -0.01869(12) 0.74363(6) 0.0445(12) Uani 1 1 d . . . . .
 C17 C 0.91744(16) 0.02836(9) 0.76818(8) 0.0415(12) Uani 1 1 d G . . . .
 C18 C 0.93203(16) 0.02368(10) 0.81084(7) 0.0403(11) Uani 1 1 d G . . . .
 C19 C 0.94227(18) -0.02805(12) 0.82896(6) 0.0496(13) Uani 1 1 d G . . . .
 C20 C 0.9379(2) -0.07510(9) 0.80441(9) 0.0597(15) Uani 1 1 d G . . . .
 C21 C 0.92333(19) -0.07043(10) 0.76175(9) 0.0597(15) Uani 1 1 d G . . . .
 H21 H 0.9204 -0.1019 0.7453 0.072 Uiso 1 1 calc R . . . .
 C22 C 0.9557(4) -0.1317(2) 0.8225(2) 0.085(2) Uani 1 1 d . . . . .
 H22A H 1.0011 -0.1324 0.8335 0.128 Uiso 1 1 calc GR . . . .
 H22B H 0.9470 -0.1592 0.8013 0.128 Uiso 1 1 calc GR . . . .
 H22C H 0.9302 -0.1394 0.8442 0.128 Uiso 1 1 calc GR . . . .
 C23 C 0.9609(3) -0.0346(2) 0.87543(16) 0.0602(15) Uani 1 1 d . . . . .
 H23A H 0.9648 0.0011 0.8882 0.090 Uiso 1 1 calc GR . . . .
 H23B H 1.0018 -0.0537 0.8810 0.090 Uiso 1 1 calc GR . . . .
 H23C H 0.9279 -0.0555 0.8864 0.090 Uiso 1 1 calc GR . . . .
 C24 C 0.92433(14) 0.07484(10) 0.83728(8) 0.0395(11) Uani 1 1 d . . . . .
 C25 C 0.97049(12) 0.11655(12) 0.83810(8) 0.0357(11) Uani 1 1 d G . . . .
 C26 C 0.96802(13) 0.16168(11) 0.86409(9) 0.0385(11) Uani 1 1 d G . . . .
 C27 C 0.91939(15) 0.16509(11) 0.88925(9) 0.0484(13) Uani 1 1 d G . . . .
 H27 H 0.9177 0.1953 0.9066 0.058 Uiso 1 1 calc R . . . .
 C28 C 0.87322(13) 0.12337(13) 0.88843(9) 0.0474(13) Uani 1 1 d G . . . .
 C29 C 0.87569(13) 0.07825(12) 0.86245(9) 0.0469(13) Uani 1 1 d G . . . .
 C30 C 0.8227(3) 0.0346(3) 0.86123(18) 0.0627(16) Uani 1 1 d . . . . .
 H30A H 0.8303 0.0060 0.8421 0.094 Uiso 1 1 calc R . . . .
 H30B H 0.8232 0.0190 0.8883 0.094 Uiso 1 1 calc R . . . .
 H30C H 0.7810 0.0512 0.8525 0.094 Uiso 1 1 calc R . . . .
 C31 C 0.8222(3) 0.1290(3) 0.91733(19) 0.0690(18) Uani 1 1 d . . . . .
 H31A H 0.8289 0.1629 0.9325 0.103 Uiso 1 1 calc R . . . .
 H31B H 0.7796 0.1291 0.9015 0.103 Uiso 1 1 calc R . . . .
 H31C H 0.8258 0.0985 0.9362 0.103 Uiso 1 1 calc R . . . .
 C32 C 1.0198(3) 0.2451(2) 0.88756(15) 0.0492(13) Uani 1 1 d . . . . .
 H32 H 0.9858 0.2481 0.9032 0.059 Uiso 1 1 calc R . . . .
 C33 C 1.06727(14) 0.28887(12) 0.89242(10) 0.0471(12) Uani 1 1 d . . . . .
 C34 C 1.12306(15) 0.29304(13) 0.87347(10) 0.0456(12) Uani 1 1 d G . . . .
 C35 C 1.16448(14) 0.33797(15) 0.88177(12) 0.0627(15) Uani 1 1 d G . . . .
 C36 C 1.15012(18) 0.37873(13) 0.90903(13) 0.0742(19) Uani 1 1 d G . . . .
 H36 H 1.1778 0.4088 0.9146 0.089 Uiso 1 1 calc R . . . .
 C37 C 1.0943(2) 0.37456(14) 0.92798(12) 0.0740(18) Uani 1 1 d G U . . .
 C38 C 1.05291(15) 0.32963(15) 0.91967(11) 0.0611(15) Uani 1 1 d G . . . .
 H38 H 1.0156 0.3268 0.9324 0.073 Uiso 1 1 calc R . . . .
 C39 C 1.0809(19) 0.4213(18) 0.9609(14) 0.094(4) Uani 0.256(15) 1 d D U . B 1
 C43 C 1.2284(3) 0.3438(3) 0.8626(2) 0.078(2) Uani 1 1 d . . . . .
 C44 C 1.2733(3) 0.2945(3) 0.8772(3) 0.100(3) Uani 1 1 d . . . . .
 H44A H 1.2818 0.2944 0.9068 0.149 Uiso 1 1 calc R . . . .
 H44B H 1.2523 0.2606 0.8678 0.149 Uiso 1 1 calc R . . . .
 H44C H 1.3136 0.2980 0.8661 0.149 Uiso 1 1 calc R . . . .
 C45 C 1.2672(4) 0.3968(4) 0.8765(4) 0.135(4) Uani 1 1 d . . . . .
 H45A H 1.2769 0.3972 0.9061 0.203 Uiso 1 1 calc R . . . .
 H45B H 1.3070 0.3974 0.8647 0.203 Uiso 1 1 calc R . . . .
 H45C H 1.2416 0.4286 0.8674 0.203 Uiso 1 1 calc R . . . .
 C46 C 1.2142(4) 0.3449(3) 0.8159(3) 0.095(2) Uani 1 1 d . . . . .
 H46A H 1.1864 0.3756 0.8073 0.143 Uiso 1 1 calc R . . . .
 H46B H 1.2543 0.3486 0.8045 0.143 Uiso 1 1 calc R . . . .
 H46C H 1.1929 0.3112 0.8062 0.143 Uiso 1 1 calc R . . . .
 C47 C 0.72698(16) 0.10668(16) 0.77969(11) 0.0611(16) Uani 1 1 d . . . . .
 C48 C 0.73731(15) 0.15171(15) 0.80614(11) 0.0545(14) Uani 1 1 d G . . . .
 C49 C 0.6957(2) 0.16128(17) 0.83523(12) 0.0776(19) Uani 1 1 d G . . . .
 H49 H 0.7026 0.1914 0.8529 0.093 Uiso 1 1 calc R . . . .
 C50 C 0.64374(19) 0.1258(2) 0.83788(14) 0.113(3) Uani 1 1 d DG U . . .
 C51 C 0.63341(18) 0.0808(2) 0.81144(15) 0.101(3) Uani 1 1 d G . . . .
 H51 H 0.5987 0.0571 0.8132 0.121 Uiso 1 1 calc R . . . .
 C52 C 0.6750(2) 0.07123(16) 0.78234(13) 0.0715(18) Uani 1 1 d G . . . .
 C53 C 0.6613(4) 0.0208(4) 0.7539(2) 0.095(3) Uani 1 1 d . . . . .
 C54 C 0.6416(5) 0.0412(4) 0.7090(3) 0.133(4) Uani 1 1 d . . . . .
 H54A H 0.6329 0.0101 0.6910 0.200 Uiso 1 1 calc R . . . .
 H54B H 0.6032 0.0637 0.7076 0.200 Uiso 1 1 calc R . . . .
 H54C H 0.6764 0.0626 0.7006 0.200 Uiso 1 1 calc R . . . .
 C55 C 0.7216(5) -0.0171(3) 0.7555(3) 0.112(3) Uani 1 1 d . . . . .
 H55A H 0.7113 -0.0480 0.7374 0.167 Uiso 1 1 calc R . . . .
 H55B H 0.7570 0.0032 0.7468 0.167 Uiso 1 1 calc R . . . .
 H55C H 0.7338 -0.0301 0.7832 0.167 Uiso 1 1 calc R . . . .
 C56 C 0.6056(5) -0.0162(4) 0.7645(3) 0.137(4) Uani 1 1 d . . . . .
 H56A H 0.5998 -0.0466 0.7455 0.206 Uiso 1 1 calc R . . . .
 H56B H 0.6161 -0.0299 0.7921 0.206 Uiso 1 1 calc R . . . .
 H56C H 0.5661 0.0049 0.7623 0.206 Uiso 1 1 calc R . . . .
 C57 C 0.5975(6) 0.1397(6) 0.8719(4) 0.137(4) Uani 0.80(2) 1 d D U . C 1
 C58 C 0.6039(13) 0.0908(8) 0.9013(6) 0.250(13) Uani 0.80(2) 1 d D U . C 1
 H58A H 0.5966 0.0572 0.8858 0.375 Uiso 0.80(2) 1 calc GR . . C 1
 H58B H 0.5723 0.0940 0.9200 0.375 Uiso 0.80(2) 1 calc GR . . C 1
 H58C H 0.6469 0.0903 0.9167 0.375 Uiso 0.80(2) 1 calc GR . . C 1
 C59 C 0.5277(6) 0.1430(11) 0.8495(6) 0.212(10) Uani 0.80(2) 1 d D U . C 1
 H59A H 0.5259 0.1686 0.8270 0.317 Uiso 0.80(2) 1 calc GR . . C 1
 H59B H 0.4993 0.1552 0.8685 0.317 Uiso 0.80(2) 1 calc GR . . C 1
 H59C H 0.5142 0.1071 0.8391 0.317 Uiso 0.80(2) 1 calc GR . . C 1
 C60 C 0.6147(9) 0.1929(8) 0.8962(7) 0.216(12) Uani 0.80(2) 1 d D U . C 1
 H60A H 0.6546 0.1877 0.9146 0.323 Uiso 0.80(2) 1 calc GR . . C 1
 H60B H 0.5804 0.2020 0.9119 0.323 Uiso 0.80(2) 1 calc GR . . C 1
 H60C H 0.6201 0.2224 0.8773 0.323 Uiso 0.80(2) 1 calc GR . . C 1
 C61 C 0.7885(2) 0.1907(2) 0.80712(17) 0.0506(13) Uani 1 1 d . . . . .
 H61 H 0.7905 0.2171 0.8279 0.061 Uiso 1 1 calc R . . . .
 C62 C 0.87885(12) 0.23928(11) 0.78667(9) 0.0371(11) Uani 1 1 d . . . . .
 C63 C 0.92905(13) 0.23662(10) 0.76265(8) 0.0313(10) Uani 1 1 d G . . . .
 C64 C 0.97555(11) 0.27824(11) 0.76523(8) 0.0320(10) Uani 1 1 d G . . . .
 C65 C 0.97186(12) 0.32252(10) 0.79184(9) 0.0361(11) Uani 1 1 d G . . . .
 C66 C 0.92166(14) 0.32518(11) 0.81585(9) 0.0444(12) Uani 1 1 d G . . . .
 C67 C 0.87516(12) 0.28356(12) 0.81327(9) 0.0481(13) Uani 1 1 d G . . . .
 H67 H 0.8416 0.2853 0.8293 0.058 Uiso 1 1 calc R . . . .
 C68 C 0.9141(3) 0.3738(2) 0.8445(2) 0.0672(17) Uani 1 1 d D . . . .
 H68A H 0.9486 0.3730 0.8674 0.101 Uiso 1 1 calc GR . . . .
 H68B H 0.8729 0.3713 0.8545 0.101 Uiso 1 1 calc GR . . . .
 H68C H 0.9162 0.4077 0.8295 0.101 Uiso 1 1 calc GR . . . .
 C69 C 1.0251(2) 0.3662(2) 0.79827(16) 0.0463(12) Uani 1 1 d D . . . .
 H69A H 1.0608 0.3551 0.7844 0.069 Uiso 1 1 calc GR . . . .
 H69B H 1.0400 0.3702 0.8273 0.069 Uiso 1 1 calc GR . . . .
 H69C H 1.0081 0.4008 0.7872 0.069 Uiso 1 1 calc GR . . . .
 C70 C 0.7271(4) 0.0860(6) 0.6232(3) 0.122(3) Uani 1 1 d D U . . .
 H70 H 0.7652 0.0653 0.6252 0.147 Uiso 1 1 calc R . . . .
 C71 C 0.6645(7) 0.0001(5) 0.5954(4) 0.171(5) Uani 1 1 d D U . . .
 H71A H 0.6471 -0.0032 0.5667 0.257 Uiso 1 1 calc GR . . . .
 H71B H 0.6371 -0.0194 0.6118 0.257 Uiso 1 1 calc GR . . . .
 H71C H 0.7076 -0.0152 0.5999 0.257 Uiso 1 1 calc GR . . . .
 C72 C 0.6076(5) 0.0900(7) 0.6038(4) 0.209(7) Uani 1 1 d D U . . .
 H72A H 0.5719 0.0667 0.5928 0.314 Uiso 1 1 calc R . . . .
 H72B H 0.6009 0.1031 0.6307 0.314 Uiso 1 1 calc R . . . .
 H72C H 0.6102 0.1209 0.5858 0.314 Uiso 1 1 calc R . . . .
 C73 C 0.6903(7) 0.2916(5) 0.7680(4) 0.151(4) Uani 1 1 d D U . . .
 H73 H 0.7315 0.3008 0.7619 0.182 Uiso 1 1 calc R . . . .
 C74 C 0.6734(7) 0.2194(5) 0.7121(3) 0.163(4) Uani 1 1 d D U . . .
 H74A H 0.7147 0.2343 0.7076 0.244 Uiso 1 1 calc GR . . . .
 H74B H 0.6434 0.2215 0.6870 0.244 Uiso 1 1 calc GR . . . .
 H74C H 0.6787 0.1815 0.7206 0.244 Uiso 1 1 calc GR . . . .
 C75 C 0.5862(6) 0.2386(7) 0.7561(5) 0.211(6) Uani 1 1 d D U . . .
 H75A H 0.5840 0.1999 0.7620 0.317 Uiso 1 1 calc GR . . . .
 H75B H 0.5526 0.2479 0.7339 0.317 Uiso 1 1 calc GR . . . .
 H75C H 0.5802 0.2594 0.7802 0.317 Uiso 1 1 calc GR . . . .
 C76 C 0.5227(10) 0.2546(10) 0.9938(6) 0.309(6) Uani 1 1 d D U . . .
 H76 H 0.5017 0.2214 0.9865 0.371 Uiso 1 1 calc R . . . .
 C77 C 0.4486(9) 0.2915(9) 0.9329(5) 0.309(6) Uani 1 1 d D U . . .
 H77A H 0.4386 0.2528 0.9304 0.463 Uiso 1 1 calc GR . . . .
 H77B H 0.4623 0.3044 0.9077 0.463 Uiso 1 1 calc GR . . . .
 H77C H 0.4106 0.3115 0.9380 0.463 Uiso 1 1 calc GR . . . .
 C78 C 0.5371(10) 0.3493(9) 0.9730(6) 0.309(6) Uani 1 1 d D U . . .
 H78A H 0.5684 0.3449 0.9973 0.463 Uiso 1 1 calc GR . . . .
 H78B H 0.5089 0.3798 0.9767 0.463 Uiso 1 1 calc GR . . . .
 H78C H 0.5593 0.3563 0.9496 0.463 Uiso 1 1 calc GR . . . .
 O9 O 0.6664(7) 0.3120(4) 0.7959(3) 0.218(4) Uani 1 1 d . U . . .
 O10 O 0.5603(5) 0.2509(5) 1.0218(3) 0.204(4) Uani 1 1 d D U . . .
 N7 N 0.2662(11) 0.2331(9) 0.9870(6) 0.179(10) Uani 0.5 1 d D U . . .
 C79 C 0.2949(16) 0.1987(10) 0.9559(7) 0.224(14) Uani 0.5 1 d D U . . .
 C80 C 0.3030(10) 0.2572(8) 1.0231(6) 0.252(9) Uani 1 1 d D U . . .
 O11 O 0.3558(15) 0.1945(13) 0.9662(9) 0.319(16) Uani 0.5 1 d D U . . .
 C42 C 1.0143(17) 0.413(3) 0.974(2) 0.162(8) Uani 0.256(15) 1 d D U . B 1
 H42A H 0.9815 0.4149 0.9501 0.243 Uiso 0.256(15) 1 calc R . . B 1
 H42B H 1.0126 0.3768 0.9863 0.243 Uiso 0.256(15) 1 calc R . . B 1
 H42C H 1.0065 0.4404 0.9935 0.243 Uiso 0.256(15) 1 calc R . . B 1
 C41 C 1.1347(17) 0.4181(16) 0.9970(12) 0.119(5) Uani 0.256(15) 1 d D U . B 1
 H41A H 1.1732 0.4034 0.9879 0.179 Uiso 0.256(15) 1 calc GR . . B 1
 H41B H 1.1214 0.3945 1.0179 0.179 Uiso 0.256(15) 1 calc GR . . B 1
 H41C H 1.1436 0.4543 1.0082 0.179 Uiso 0.256(15) 1 calc GR . . B 1
 C40 C 1.083(3) 0.4753(16) 0.9375(13) 0.150(17) Uani 0.256(15) 1 d D U . B 1
 H40A H 1.1189 0.4972 0.9503 0.225 Uiso 0.256(15) 1 calc GR . . B 1
 H40B H 1.0432 0.4950 0.9379 0.225 Uiso 0.256(15) 1 calc GR . . B 1
 H40C H 1.0890 0.4677 0.9094 0.225 Uiso 0.256(15) 1 calc GR . . B 1
 C59A C 0.542(2) 0.090(2) 0.8634(15) 0.126(16) Uani 0.20(2) 1 d D U . C 2
 H59D H 0.5637 0.0561 0.8704 0.189 Uiso 0.20(2) 1 calc R . . C 2
 H59E H 0.5112 0.0975 0.8822 0.189 Uiso 0.20(2) 1 calc R . . C 2
 H59F H 0.5195 0.0885 0.8357 0.189 Uiso 0.20(2) 1 calc R . . C 2
 C60A C 0.559(3) 0.192(2) 0.856(2) 0.18(2) Uani 0.20(2) 1 d D U . C 2
 H60D H 0.5921 0.2201 0.8577 0.268 Uiso 0.20(2) 1 calc R . . C 2
 H60E H 0.5371 0.1907 0.8278 0.268 Uiso 0.20(2) 1 calc R . . C 2
 H60F H 0.5289 0.1997 0.8743 0.268 Uiso 0.20(2) 1 calc R . . C 2
 C58A C 0.631(2) 0.138(3) 0.9091(13) 0.15(2) Uani 0.20(2) 1 d D U . C 2
 H58D H 0.6620 0.1674 0.9105 0.227 Uiso 0.20(2) 1 calc R . . C 2
 H58E H 0.6022 0.1437 0.9294 0.227 Uiso 0.20(2) 1 calc R . . C 2
 H58F H 0.6532 0.1034 0.9144 0.227 Uiso 0.20(2) 1 calc R . . C 2
 C14A C 0.7317(17) -0.1909(13) 0.5870(9) 0.079(9) Uani 0.35(3) 1 d D U . A 2
 H14D H 0.7651 -0.2095 0.6052 0.118 Uiso 0.35(3) 1 calc GR . . A 2
 H14E H 0.7030 -0.2176 0.5724 0.118 Uiso 0.35(3) 1 calc GR . . A 2
 H14F H 0.7073 -0.1674 0.6029 0.118 Uiso 0.35(3) 1 calc GR . . A 2
 C12A C 0.710(2) -0.1389(12) 0.5206(10) 0.155(19) Uani 0.35(3) 1 d D U . A 2
 H12D H 0.6709 -0.1306 0.5315 0.232 Uiso 0.35(3) 1 calc GR . . A 2
 H12E H 0.7029 -0.1686 0.5012 0.232 Uiso 0.35(3) 1 calc GR . . A 2
 H12F H 0.7246 -0.1068 0.5071 0.232 Uiso 0.35(3) 1 calc GR . . A 2
 C13A C 0.8148(18) -0.1894(14) 0.5383(13) 0.146(14) Uani 0.35(3) 1 d D U . A 2
 H13D H 0.8301 -0.1692 0.5163 0.219 Uiso 0.35(3) 1 calc GR . . A 2
 H13E H 0.7964 -0.2238 0.5278 0.219 Uiso 0.35(3) 1 calc GR . . A 2
 H13F H 0.8505 -0.1964 0.5597 0.219 Uiso 0.35(3) 1 calc GR . . A 2
 C11A C 0.7631(14) -0.1558(8) 0.5559(7) 0.080(5) Uani 0.35(3) 1 d D U . A 2
 C41A C 1.1298(6) 0.4548(6) 0.9761(4) 0.119(5) Uani 0.744(15) 1 d D U . B 2
 H41D H 1.1612 0.4292 0.9893 0.179 Uiso 0.744(15) 1 calc GR . . B 2
 H41E H 1.1164 0.4794 0.9963 0.179 Uiso 0.744(15) 1 calc GR . . B 2
 H41F H 1.1488 0.4757 0.9559 0.179 Uiso 0.744(15) 1 calc GR . . B 2
 C40A C 1.0275(10) 0.4625(6) 0.9269(5) 0.193(11) Uani 0.744(15) 1 d D . . B 2
 H40D H 1.0497 0.4739 0.9044 0.290 Uiso 0.744(15) 1 calc GR . . B 2
 H40E H 1.0174 0.4944 0.9423 0.290 Uiso 0.744(15) 1 calc GR . . B 2
 H40F H 0.9880 0.4438 0.9162 0.290 Uiso 0.744(15) 1 calc GR . . B 2
 C42A C 1.0336(9) 0.4011(11) 0.9883(7) 0.162(8) Uani 0.744(15) 1 d D U . B 2
 H42D H 0.9956 0.3820 0.9754 0.243 Uiso 0.744(15) 1 calc GR . . B 2
 H42E H 1.0208 0.4310 1.0046 0.243 Uiso 0.744(15) 1 calc GR . . B 2
 H42F H 1.0608 0.3760 1.0057 0.243 Uiso 0.744(15) 1 calc GR . . B 2
 C57A C 0.5914(15) 0.1366(16) 0.8664(11) 0.122(6) Uani 0.20(2) 1 d D U . C 2
 C39A C 1.0712(7) 0.4237(6) 0.9551(5) 0.096(4) Uani 0.744(15) 1 d D U . B 2

loop_
  _atom_site_aniso_label
  _atom_site_aniso_U_11
  _atom_site_aniso_U_22
  _atom_site_aniso_U_33
  _atom_site_aniso_U_23
  _atom_site_aniso_U_13
  _atom_site_aniso_U_12
 Zn1 0.0389(5) 0.0233(5) 0.0365(4) 0.000 0.0013(3) 0.000
 Zn2 0.0411(4) 0.0341(4) 0.0503(4) 0.0017(3) 0.0058(3) -0.0074(3)
 Zn3 0.0426(4) 0.0286(4) 0.0417(3) 0.0043(3) 0.0052(3) 0.0020(3)
 Zn4 0.0541(4) 0.0279(4) 0.0458(4) -0.0019(3) -0.0028(3) -0.0055(3)
 O1 0.076(2) 0.039(2) 0.0443(18) 0.0042(16) -0.0005(17) -0.0106(18)
 O2 0.0467(18) 0.029(2) 0.0386(16) 0.0023(14) 0.0011(13) -0.0051(14)
 O3 0.0415(17) 0.0237(17) 0.0379(16) -0.0001(13) 0.0031(13) -0.0027(13)
 O4 0.052(2) 0.036(2) 0.064(2) -0.0129(18) 0.0074(16) -0.0116(16)
 O5 0.060(2) 0.062(3) 0.075(2) -0.001(2) 0.011(2) -0.025(2)
 O6 0.0336(16) 0.0255(19) 0.0417(16) -0.0025(14) 0.0062(13) -0.0009(13)
 O7 0.0438(18) 0.036(2) 0.0470(18) 0.0029(15) -0.0008(14) -0.0041(14)
 O8 0.098(4) 0.095(5) 0.131(5) -0.011(4) -0.026(3) -0.003(3)
 N1 0.063(3) 0.039(3) 0.041(2) -0.003(2) -0.0032(19) -0.008(2)
 N2 0.045(2) 0.030(2) 0.040(2) -0.0025(19) 0.0048(17) -0.0076(18)
 N3 0.037(2) 0.042(3) 0.051(2) 0.0089(19) 0.0104(18) -0.0052(18)
 N4 0.073(4) 0.142(6) 0.096(4) -0.014(4) 0.002(3) -0.010(4)
 N5 0.147(6) 0.130(7) 0.158(7) 0.070(5) 0.036(5) 0.042(5)
 N6 0.236(11) 0.417(17) 0.253(11) -0.051(11) -0.040(7) -0.012(11)
 C6 0.061(3) 0.035(3) 0.049(3) -0.006(3) 0.001(2) -0.009(3)
 C1 0.069(3) 0.037(3) 0.045(3) -0.013(2) 0.003(2) -0.010(3)
 C2 0.092(4) 0.042(4) 0.053(3) -0.004(3) 0.008(3) -0.019(3)
 C3 0.103(5) 0.063(4) 0.052(3) -0.020(3) 0.006(3) -0.027(4)
 C4 0.094(4) 0.061(4) 0.047(3) -0.008(3) 0.004(3) -0.013(3)
 C5 0.069(3) 0.053(4) 0.046(3) -0.003(3) 0.000(3) -0.007(3)
 C7 0.091(4) 0.055(4) 0.045(3) 0.005(3) -0.002(3) -0.009(3)
 C8 0.130(6) 0.058(5) 0.085(5) 0.017(4) 0.000(4) 0.009(4)
 C9 0.101(5) 0.098(6) 0.068(4) 0.023(4) 0.017(4) -0.013(4)
 C10 0.163(8) 0.106(7) 0.049(4) 0.007(4) 0.002(4) -0.033(6)
 C11 0.119(9) 0.086(9) 0.074(8) -0.029(6) 0.030(7) -0.061(8)
 C12 0.122(10) 0.114(13) 0.191(18) -0.056(12) -0.012(10) -0.056(9)
 C13 0.22(3) 0.129(17) 0.106(13) -0.073(13) 0.069(16) -0.105(19)
 C14 0.35(4) 0.146(15) 0.102(10) 0.010(10) -0.037(13) -0.175(18)
 C15 0.078(4) 0.031(3) 0.050(3) 0.013(3) 0.001(3) -0.010(3)
 C16 0.063(3) 0.021(3) 0.046(3) -0.004(2) -0.004(2) -0.008(2)
 C17 0.047(3) 0.032(3) 0.044(3) 0.009(2) 0.000(2) -0.012(2)
 C18 0.053(3) 0.022(3) 0.045(3) 0.000(2) -0.001(2) -0.012(2)
 C19 0.064(3) 0.039(3) 0.043(3) 0.009(2) -0.004(2) -0.014(3)
 C20 0.086(4) 0.029(3) 0.059(3) 0.007(3) -0.008(3) -0.008(3)
 C21 0.088(4) 0.029(3) 0.057(3) -0.002(3) -0.007(3) -0.013(3)
 C22 0.153(7) 0.025(4) 0.069(4) 0.011(3) -0.016(4) -0.006(4)
 C23 0.085(4) 0.040(3) 0.052(3) 0.011(3) -0.006(3) -0.016(3)
 C24 0.055(3) 0.026(3) 0.036(2) 0.006(2) 0.001(2) -0.010(2)
 C25 0.044(3) 0.030(3) 0.032(2) 0.003(2) 0.003(2) -0.005(2)
 C26 0.045(3) 0.032(3) 0.037(2) 0.003(2) 0.004(2) -0.005(2)
 C27 0.062(3) 0.043(3) 0.043(3) 0.000(2) 0.017(2) -0.005(3)
 C28 0.056(3) 0.043(3) 0.045(3) 0.010(2) 0.013(2) -0.010(2)
 C29 0.053(3) 0.046(3) 0.041(3) 0.009(2) 0.004(2) -0.014(2)
 C30 0.065(3) 0.063(4) 0.061(3) 0.011(3) 0.011(3) -0.024(3)
 C31 0.072(4) 0.073(5) 0.067(4) -0.002(3) 0.030(3) -0.016(3)
 C32 0.055(3) 0.046(4) 0.047(3) -0.008(3) 0.013(2) -0.006(3)
 C33 0.059(3) 0.035(3) 0.047(3) -0.006(2) 0.005(2) -0.005(2)
 C34 0.052(3) 0.028(3) 0.055(3) -0.003(2) 0.000(2) -0.005(2)
 C35 0.058(3) 0.048(4) 0.080(4) -0.007(3) 0.002(3) -0.010(3)
 C36 0.077(4) 0.045(4) 0.099(5) -0.024(4) 0.006(4) -0.012(3)
 C37 0.091(4) 0.050(4) 0.079(4) -0.026(3) 0.005(3) -0.010(3)
 C38 0.075(4) 0.044(4) 0.065(3) -0.013(3) 0.012(3) -0.005(3)
 C39 0.117(6) 0.067(7) 0.098(6) -0.043(5) 0.014(5) -0.007(5)
 C43 0.058(4) 0.058(4) 0.120(6) -0.023(4) 0.014(4) -0.022(3)
 C44 0.061(4) 0.096(6) 0.138(7) -0.015(5) 0.001(4) -0.006(4)
 C45 0.105(6) 0.088(7) 0.225(11) -0.058(7) 0.063(7) -0.065(5)
 C46 0.087(5) 0.078(6) 0.128(7) -0.002(5) 0.042(5) -0.020(4)
 C47 0.044(3) 0.074(5) 0.066(4) 0.020(3) 0.008(3) -0.017(3)
 C48 0.047(3) 0.058(4) 0.060(3) 0.014(3) 0.015(2) -0.011(3)
 C49 0.066(4) 0.089(5) 0.083(4) 0.008(4) 0.028(3) -0.011(4)
 C50 0.068(4) 0.164(8) 0.116(5) 0.030(5) 0.046(4) -0.036(5)
 C51 0.072(5) 0.129(8) 0.101(6) 0.026(5) 0.010(4) -0.051(5)
 C52 0.066(4) 0.071(5) 0.075(4) 0.024(3) 0.002(3) -0.031(3)
 C53 0.094(5) 0.099(7) 0.088(5) 0.017(4) -0.003(4) -0.061(5)
 C54 0.134(8) 0.156(10) 0.096(6) 0.034(6) -0.031(5) -0.070(7)
 C55 0.130(8) 0.076(6) 0.126(7) 0.000(5) 0.009(6) -0.046(6)
 C56 0.127(7) 0.133(9) 0.150(8) 0.020(7) 0.010(6) -0.099(7)
 C57 0.096(6) 0.191(9) 0.139(7) 0.007(6) 0.070(5) -0.043(6)
 C58 0.33(3) 0.257(18) 0.206(18) 0.076(16) 0.18(2) -0.004(18)
 C59 0.094(8) 0.31(3) 0.241(17) -0.032(18) 0.064(8) -0.017(10)
 C60 0.193(18) 0.258(16) 0.23(2) -0.089(16) 0.163(17) -0.095(15)
 C61 0.047(3) 0.045(4) 0.061(3) 0.000(3) 0.014(3) -0.005(2)
 C62 0.036(2) 0.029(3) 0.048(3) 0.007(2) 0.013(2) -0.003(2)
 C63 0.037(2) 0.020(3) 0.037(2) 0.000(2) 0.0056(19) 0.0027(19)
 C64 0.033(2) 0.022(3) 0.042(2) 0.004(2) 0.0072(18) 0.0030(19)
 C65 0.041(2) 0.024(3) 0.044(2) -0.002(2) 0.008(2) 0.001(2)
 C66 0.050(3) 0.037(3) 0.048(3) -0.008(2) 0.015(2) 0.000(2)
 C67 0.048(3) 0.042(3) 0.060(3) -0.009(3) 0.027(2) 0.000(2)
 C68 0.080(4) 0.050(4) 0.078(4) -0.026(3) 0.034(3) -0.007(3)
 C69 0.050(3) 0.033(3) 0.055(3) -0.003(2) 0.007(2) -0.003(2)
 C70 0.060(5) 0.192(12) 0.112(7) 0.010(8) -0.001(4) 0.009(6)
 C71 0.205(13) 0.150(9) 0.160(10) -0.051(9) 0.030(9) -0.071(10)
 C72 0.078(6) 0.39(2) 0.150(10) 0.006(12) -0.011(6) 0.065(9)
 C73 0.179(9) 0.126(8) 0.155(8) 0.040(7) 0.042(7) 0.055(6)
 C74 0.210(11) 0.133(9) 0.139(8) 0.028(7) 0.007(8) 0.025(8)
 C75 0.155(10) 0.221(13) 0.263(14) 0.108(11) 0.051(10) 0.004(10)
 C76 0.236(11) 0.417(17) 0.253(11) -0.051(11) -0.040(7) -0.012(11)
 C77 0.236(11) 0.417(17) 0.253(11) -0.051(11) -0.040(7) -0.012(11)
 C78 0.236(11) 0.417(17) 0.253(11) -0.051(11) -0.040(7) -0.012(11)
 O9 0.326(12) 0.152(8) 0.185(8) 0.013(6) 0.064(8) 0.092(8)
 O10 0.188(9) 0.242(11) 0.178(8) -0.035(8) 0.014(6) 0.028(8)
 N7 0.25(3) 0.12(2) 0.15(2) 0.011(13) -0.031(18) -0.046(18)
 C79 0.31(3) 0.15(3) 0.19(3) 0.04(2) -0.04(3) -0.05(3)
 C80 0.28(2) 0.218(17) 0.227(17) 0.060(14) -0.083(15) -0.049(16)
 O11 0.34(3) 0.29(3) 0.30(3) 0.01(3) -0.07(3) 0.05(3)
 C42 0.150(7) 0.162(17) 0.19(2) -0.120(14) 0.068(11) -0.051(11)
 C41 0.147(8) 0.078(9) 0.123(7) -0.058(6) -0.014(7) 0.006(7)
 C40 0.23(5) 0.078(10) 0.15(3) -0.018(15) 0.08(3) 0.017(17)
 C59A 0.08(2) 0.18(2) 0.12(3) 0.03(2) 0.05(2) -0.03(2)
 C60A 0.19(5) 0.22(2) 0.14(4) 0.05(3) 0.09(4) 0.04(3)
 C58A 0.082(19) 0.26(6) 0.123(11) 0.038(17) 0.049(11) -0.05(3)
 C14A 0.104(14) 0.060(14) 0.074(13) -0.030(11) 0.020(11) -0.041(11)
 C12A 0.21(3) 0.09(2) 0.13(3) -0.029(18) -0.09(3) -0.04(2)
 C13A 0.146(17) 0.11(2) 0.18(3) -0.10(2) 0.028(17) -0.046(14)
 C11A 0.123(9) 0.066(8) 0.050(8) -0.026(6) 0.001(7) -0.037(7)
 C41A 0.147(8) 0.078(9) 0.123(7) -0.058(6) -0.014(7) 0.006(7)
 C40A 0.23(2) 0.105(12) 0.213(18) -0.102(12) -0.095(16) 0.105(13)
 C42A 0.150(7) 0.162(17) 0.19(2) -0.120(14) 0.068(11) -0.051(11)
 C57A 0.075(9) 0.180(12) 0.123(10) 0.028(9) 0.051(8) -0.029(9)
 C39A 0.126(10) 0.051(7) 0.108(9) -0.051(7) 0.001(7) -0.012(7)

_geom_special_details
;
 All esds (except the esd in the dihedral angle between two l.s. planes)
 are estimated using the full covariance matrix.  The cell esds are taken
 into account individually in the estimation of esds in distances, angles
 and torsion angles; correlations between esds in cell parameters are only
 used when they are defined by crystal symmetry.  An approximate (isotropic)
 treatment of cell esds is used for estimating esds involving l.s. planes.
;
loop_
  _geom_bond_atom_site_label_1
  _geom_bond_atom_site_label_2
  _geom_bond_distance
  _geom_bond_site_symmetry_2
  _geom_bond_publ_flag
 Zn1 O2 2.113(3) 2_756 ?
 Zn1 O2 2.113(3) . ?
 Zn1 O3 2.075(3) . ?
 Zn1 O3 2.075(3) 2_756 ?
 Zn1 O6 2.108(3) . ?
 Zn1 O6 2.108(3) 2_756 ?
 Zn2 Zn3 3.1468(8) . ?
 Zn2 Zn4 3.1233(9) . ?
 Zn2 O2 2.021(3) . ?
 Zn2 O5 1.931(4) . ?
 Zn2 O6 2.306(3) . ?
 Zn2 O7 2.024(3) . ?
 Zn2 N3 1.993(4) . ?
 Zn3 Zn4 3.1102(9) . ?
 Zn3 O3 2.327(3) 2_756 ?
 Zn3 O4 1.933(3) 2_756 ?
 Zn3 O6 2.041(3) . ?
 Zn3 O7 2.027(3) . ?
 Zn3 N2 1.997(4) 2_756 ?
 Zn4 O1 1.933(3) . ?
 Zn4 O2 2.333(3) . ?
 Zn4 O3 2.004(3) 2_756 ?
 Zn4 O7 2.043(3) . ?
 Zn4 N1 1.977(4) . ?
 O1 C6 1.351(4) . ?
 O2 C17 1.375(4) . ?
 O3 Zn3 2.327(3) 2_756 ?
 O3 Zn4 2.004(3) 2_756 ?
 O3 C25 1.364(4) . ?
 O4 Zn3 1.933(3) 2_756 ?
 O4 C34 1.342(4) . ?
 O5 C47 1.337(5) . ?
 O6 C63 1.373(3) . ?
 O8 C70 1.187(12) . ?
 N1 C15 1.310(7) . ?
 N1 C16 1.421(4) . ?
 N2 Zn3 1.997(4) 2_756 ?
 N2 C26 1.438(4) . ?
 N2 C32 1.298(6) . ?
 N3 C61 1.308(6) . ?
 N3 C62 1.436(4) . ?
 N4 C70 1.434(10) . ?
 N4 C71 1.480(11) . ?
 N4 C72 1.436(11) . ?
 N5 C73 1.463(13) . ?
 N5 C74 1.463(12) . ?
 N5 C75 1.419(12) . ?
 N6 C76 1.464(17) . ?
 N6 C77 1.413(14) . ?
 N6 C78 1.433(16) . ?
 C6 C1 1.3900 . ?
 C6 C5 1.3900 . ?
 C1 C2 1.3900 . ?
 C1 C15 1.450(5) . ?
 C2 H2 0.9300 . ?
 C2 C3 1.3900 . ?
 C3 C4 1.3900 . ?
 C3 C11 1.585(10) . ?
 C3 C11A 1.586(16) . ?
 C4 H4 0.9300 . ?
 C4 C5 1.3900 . ?
 C5 C7 1.565(6) . ?
 C7 C8 1.515(9) . ?
 C7 C9 1.520(9) . ?
 C7 C10 1.546(8) . ?
 C8 H8A 0.9600 . ?
 C8 H8B 0.9600 . ?
 C8 H8C 0.9600 . ?
 C9 H9A 0.9600 . ?
 C9 H9B 0.9600 . ?
 C9 H9C 0.9600 . ?
 C10 H10A 0.9600 . ?
 C10 H10B 0.9600 . ?
 C10 H10C 0.9600 . ?
 C11 C12 1.522(12) . ?
 C11 C13 1.518(11) . ?
 C11 C14 1.530(12) . ?
 C12 H12A 0.9600 . ?
 C12 H12B 0.9600 . ?
 C12 H12C 0.9600 . ?
 C13 H13A 0.9600 . ?
 C13 H13B 0.9600 . ?
 C13 H13C 0.9600 . ?
 C14 H14A 0.9600 . ?
 C14 H14B 0.9600 . ?
 C14 H14C 0.9600 . ?
 C15 H15 0.9300 . ?
 C16 C17 1.3900 . ?
 C16 C21 1.3900 . ?
 C17 C18 1.3900 . ?
 C18 C19 1.3900 . ?
 C18 C24 1.532(3) . ?
 C19 C20 1.3900 . ?
 C19 C23 1.523(5) . ?
 C20 C21 1.3900 . ?
 C20 C22 1.520(6) . ?
 C21 H21 0.9300 . ?
 C22 H22A 0.9600 . ?
 C22 H22B 0.9600 . ?
 C22 H22C 0.9600 . ?
 C23 H23A 0.9600 . ?
 C23 H23B 0.9600 . ?
 C23 H23C 0.9600 . ?
 C24 C25 1.3900 . ?
 C24 C29 1.3900 . ?
 C25 C26 1.3900 . ?
 C26 C27 1.3900 . ?
 C27 H27 0.9300 . ?
 C27 C28 1.3900 . ?
 C28 C29 1.3900 . ?
 C28 C31 1.520(6) . ?
 C29 C30 1.523(6) . ?
 C30 H30A 0.9600 . ?
 C30 H30B 0.9600 . ?
 C30 H30C 0.9600 . ?
 C31 H31A 0.9600 . ?
 C31 H31B 0.9600 . ?
 C31 H31C 0.9600 . ?
 C32 H32 0.9300 . ?
 C32 C33 1.440(6) . ?
 C33 C34 1.3900 . ?
 C33 C38 1.3900 . ?
 C34 C35 1.3900 . ?
 C35 C36 1.3900 . ?
 C35 C43 1.551(7) . ?
 C36 H36 0.9300 . ?
 C36 C37 1.3900 . ?
 C37 C38 1.3900 . ?
 C37 C39 1.61(5) . ?
 C37 C39A 1.597(18) . ?
 C38 H38 0.9300 . ?
 C39 C42 1.52(2) . ?
 C39 C41 1.51(2) . ?
 C39 C40 1.52(2) . ?
 C43 C44 1.547(10) . ?
 C43 C45 1.551(9) . ?
 C43 C46 1.514(10) . ?
 C44 H44A 0.9600 . ?
 C44 H44B 0.9600 . ?
 C44 H44C 0.9600 . ?
 C45 H45A 0.9600 . ?
 C45 H45B 0.9600 . ?
 C45 H45C 0.9600 . ?
 C46 H46A 0.9600 . ?
 C46 H46B 0.9600 . ?
 C46 H46C 0.9600 . ?
 C47 C48 1.3900 . ?
 C47 C52 1.3900 . ?
 C48 C49 1.3900 . ?
 C48 C61 1.418(6) . ?
 C49 H49 0.9300 . ?
 C49 C50 1.3900 . ?
 C50 C51 1.3900 . ?
 C50 C57 1.601(11) . ?
 C50 C57A 1.547(19) . ?
 C51 H51 0.9300 . ?
 C51 C52 1.3900 . ?
 C52 C53 1.538(9) . ?
 C53 C54 1.548(10) . ?
 C53 C55 1.547(12) . ?
 C53 C56 1.540(9) . ?
 C54 H54A 0.9600 . ?
 C54 H54B 0.9600 . ?
 C54 H54C 0.9600 . ?
 C55 H55A 0.9600 . ?
 C55 H55B 0.9600 . ?
 C55 H55C 0.9600 . ?
 C56 H56A 0.9600 . ?
 C56 H56B 0.9600 . ?
 C56 H56C 0.9600 . ?
 C57 C58 1.519(15) . ?
 C57 C59 1.531(14) . ?
 C57 C60 1.530(14) . ?
 C58 H58A 0.9600 . ?
 C58 H58B 0.9600 . ?
 C58 H58C 0.9600 . ?
 C59 H59A 0.9600 . ?
 C59 H59B 0.9600 . ?
 C59 H59C 0.9600 . ?
 C60 H60A 0.9600 . ?
 C60 H60B 0.9600 . ?
 C60 H60C 0.9600 . ?
 C61 H61 0.9300 . ?
 C62 C63 1.3900 . ?
 C62 C67 1.3900 . ?
 C63 C64 1.3900 . ?
 C64 C64 1.517(4) 2_756 ?
 C64 C65 1.3900 . ?
 C65 C66 1.3900 . ?
 C65 C69 1.523(5) . ?
 C66 C67 1.3900 . ?
 C66 C68 1.527(6) . ?
 C67 H67 0.9300 . ?
 C68 H68A 0.9600 . ?
 C68 H68B 0.9600 . ?
 C68 H68C 0.9600 . ?
 C69 H69A 0.9600 . ?
 C69 H69B 0.9600 . ?
 C69 H69C 0.9600 . ?
 C70 H70 0.9300 . ?
 C71 H71A 0.9600 . ?
 C71 H71B 0.9600 . ?
 C71 H71C 0.9600 . ?
 C72 H72A 0.9600 . ?
 C72 H72B 0.9600 . ?
 C72 H72C 0.9600 . ?
 C73 H73 0.9300 . ?
 C73 O9 1.202(13) . ?
 C74 H74A 0.9600 . ?
 C74 H74B 0.9600 . ?
 C74 H74C 0.9600 . ?
 C75 H75A 0.9600 . ?
 C75 H75B 0.9600 . ?
 C75 H75C 0.9600 . ?
 C76 H76 0.9300 . ?
 C76 O10 1.122(13) . ?
 C77 H77A 0.9600 . ?
 C77 H77B 0.9600 . ?
 C77 H77C 0.9600 . ?
 C78 H78A 0.9600 . ?
 C78 H78B 0.9600 . ?
 C78 H78C 0.9600 . ?
 N7 N7 1.42(5) 7_557 ?
 N7 C79 1.500(17) . ?
 N7 C80 1.437(16) . ?
 N7 C80 1.45(3) 7_557 ?
 C79 O11 1.265(19) . ?
 C80 N7 1.45(3) 7_557 ?
 C42 H42A 0.9600 . ?
 C42 H42B 0.9600 . ?
 C42 H42C 0.9600 . ?
 C41 H41A 0.9600 . ?
 C41 H41B 0.9600 . ?
 C41 H41C 0.9600 . ?
 C40 H40A 0.9600 . ?
 C40 H40B 0.9600 . ?
 C40 H40C 0.9600 . ?
 C59A H59D 0.9600 . ?
 C59A H59E 0.9600 . ?
 C59A H59F 0.9600 . ?
 C59A C57A 1.511(19) . ?
 C60A H60D 0.9600 . ?
 C60A H60E 0.9600 . ?
 C60A H60F 0.9600 . ?
 C60A C57A 1.513(19) . ?
 C58A H58D 0.9600 . ?
 C58A H58E 0.9600 . ?
 C58A H58F 0.9600 . ?
 C58A C57A 1.517(19) . ?
 C14A H14D 0.9600 . ?
 C14A H14E 0.9600 . ?
 C14A H14F 0.9600 . ?
 C14A C11A 1.538(17) . ?
 C12A H12D 0.9600 . ?
 C12A H12E 0.9600 . ?
 C12A H12F 0.9600 . ?
 C12A C11A 1.528(17) . ?
 C13A H13D 0.9600 . ?
 C13A H13E 0.9600 . ?
 C13A H13F 0.9600 . ?
 C13A C11A 1.523(18) . ?
 C41A H41D 0.9600 . ?
 C41A H41E 0.9600 . ?
 C41A H41F 0.9600 . ?
 C41A C39A 1.511(13) . ?
 C40A H40D 0.9600 . ?
 C40A H40E 0.9600 . ?
 C40A H40F 0.9600 . ?
 C40A C39A 1.525(14) . ?
 C42A H42D 0.9600 . ?
 C42A H42E 0.9600 . ?
 C42A H42F 0.9600 . ?
 C42A C39A 1.523(14) . ?

loop_
  _geom_angle_atom_site_label_1
  _geom_angle_atom_site_label_2
  _geom_angle_atom_site_label_3
  _geom_angle
  _geom_angle_site_symmetry_1
  _geom_angle_site_symmetry_3
  _geom_angle_publ_flag
 O2 Zn1 O2 111.33(18) 2_756 . ?
 O3 Zn1 O2 82.17(11) 2_756 . ?
 O3 Zn1 O2 82.18(11) . 2_756 ?
 O3 Zn1 O2 88.29(11) . . ?
 O3 Zn1 O2 88.29(11) 2_756 2_756 ?
 O3 Zn1 O3 163.08(17) . 2_756 ?
 O3 Zn1 O6 83.38(11) 2_756 . ?
 O3 Zn1 O6 83.38(11) . 2_756 ?
 O3 Zn1 O6 109.35(12) . . ?
 O3 Zn1 O6 109.35(12) 2_756 2_756 ?
 O6 Zn1 O2 162.53(12) 2_756 . ?
 O6 Zn1 O2 162.53(12) . 2_756 ?
 O6 Zn1 O2 82.78(12) . . ?
 O6 Zn1 O2 82.77(12) 2_756 2_756 ?
 O6 Zn1 O6 85.53(15) . 2_756 ?
 Zn4 Zn2 Zn3 59.48(2) . . ?
 O2 Zn2 Zn3 87.80(9) . . ?
 O2 Zn2 Zn4 48.30(8) . . ?
 O2 Zn2 O6 80.03(12) . . ?
 O2 Zn2 O7 87.22(12) . . ?
 O5 Zn2 Zn3 143.52(12) . . ?
 O5 Zn2 Zn4 105.54(13) . . ?
 O5 Zn2 O2 106.64(16) . . ?
 O5 Zn2 O6 171.24(15) . . ?
 O5 Zn2 O7 106.90(15) . . ?
 O5 Zn2 N3 94.59(16) . . ?
 O6 Zn2 Zn3 40.39(7) . . ?
 O6 Zn2 Zn4 83.11(7) . . ?
 O7 Zn2 Zn3 39.08(9) . . ?
 O7 Zn2 Zn4 40.07(9) . . ?
 O7 Zn2 O6 78.71(11) . . ?
 N3 Zn2 Zn3 105.01(11) . . ?
 N3 Zn2 Zn4 159.73(11) . . ?
 N3 Zn2 O2 123.71(14) . . ?
 N3 Zn2 O6 76.84(13) . . ?
 N3 Zn2 O7 135.53(15) . . ?
 Zn4 Zn3 Zn2 59.89(2) . . ?
 O3 Zn3 Zn2 81.62(7) 2_756 . ?
 O3 Zn3 Zn4 40.09(7) 2_756 . ?
 O4 Zn3 Zn2 107.00(10) 2_756 . ?
 O4 Zn3 Zn4 140.25(11) 2_756 . ?
 O4 Zn3 O3 170.01(13) 2_756 2_756 ?
 O4 Zn3 O6 110.66(14) 2_756 . ?
 O4 Zn3 O7 104.29(14) 2_756 . ?
 O4 Zn3 N2 95.41(15) 2_756 2_756 ?
 O6 Zn3 Zn2 47.05(8) . . ?
 O6 Zn3 Zn4 87.75(9) . . ?
 O6 Zn3 O3 78.82(11) . 2_756 ?
 O7 Zn3 Zn2 39.01(9) . . ?
 O7 Zn3 Zn4 40.37(9) . . ?
 O7 Zn3 O3 79.07(12) . 2_756 ?
 O7 Zn3 O6 85.21(12) . . ?
 N2 Zn3 Zn2 157.49(11) 2_756 . ?
 N2 Zn3 Zn4 101.22(12) 2_756 . ?
 N2 Zn3 O3 75.87(13) 2_756 2_756 ?
 N2 Zn3 O6 126.48(13) 2_756 . ?
 N2 Zn3 O7 133.39(15) 2_756 . ?
 Zn3 Zn4 Zn2 60.64(2) . . ?
 O1 Zn4 Zn2 142.20(12) . . ?
 O1 Zn4 Zn3 105.26(11) . . ?
 O1 Zn4 O2 170.66(13) . . ?
 O1 Zn4 O3 109.59(14) . 2_756 ?
 O1 Zn4 O7 105.87(14) . . ?
 O1 Zn4 N1 94.73(15) . . ?
 O2 Zn4 Zn2 40.31(8) . . ?
 O2 Zn4 Zn3 83.61(8) . . ?
 O3 Zn4 Zn2 87.32(9) 2_756 . ?
 O3 Zn4 Zn3 48.42(8) 2_756 . ?
 O3 Zn4 O2 78.38(11) 2_756 . ?
 O3 Zn4 O7 86.83(12) 2_756 . ?
 O7 Zn4 Zn2 39.62(9) . . ?
 O7 Zn4 Zn3 39.99(9) . . ?
 O7 Zn4 O2 78.93(12) . . ?
 N1 Zn4 Zn2 99.89(12) . . ?
 N1 Zn4 Zn3 159.23(12) . . ?
 N1 Zn4 O2 76.17(14) . . ?
 N1 Zn4 O3 129.51(15) . 2_756 ?
 N1 Zn4 O7 128.89(16) . . ?
 C6 O1 Zn4 126.5(3) . . ?
 Zn1 O2 Zn4 93.72(11) . . ?
 Zn2 O2 Zn1 102.82(14) . . ?
 Zn2 O2 Zn4 91.39(11) . . ?
 C17 O2 Zn1 121.6(2) . . ?
 C17 O2 Zn2 128.8(2) . . ?
 C17 O2 Zn4 108.4(2) . . ?
 Zn1 O3 Zn3 94.58(11) . 2_756 ?
 Zn4 O3 Zn1 105.52(13) 2_756 . ?
 Zn4 O3 Zn3 91.49(11) 2_756 2_756 ?
 C25 O3 Zn1 122.9(2) . . ?
 C25 O3 Zn3 110.2(2) . 2_756 ?
 C25 O3 Zn4 123.5(2) . 2_756 ?
 C34 O4 Zn3 127.1(3) . 2_756 ?
 C47 O5 Zn2 127.3(3) . . ?
 Zn1 O6 Zn2 94.02(11) . . ?
 Zn3 O6 Zn1 102.62(12) . . ?
 Zn3 O6 Zn2 92.56(11) . . ?
 C63 O6 Zn1 122.5(2) . . ?
 C63 O6 Zn2 109.78(18) . . ?
 C63 O6 Zn3 126.5(2) . . ?
 Zn2 O7 Zn3 101.91(14) . . ?
 Zn2 O7 Zn4 100.32(14) . . ?
 Zn3 O7 Zn4 99.64(14) . . ?
 C15 N1 Zn4 120.8(3) . . ?
 C15 N1 C16 120.4(4) . . ?
 C16 N1 Zn4 118.6(3) . . ?
 C26 N2 Zn3 119.5(3) . 2_756 ?
 C32 N2 Zn3 120.8(3) . 2_756 ?
 C32 N2 C26 119.7(4) . . ?
 C61 N3 Zn2 120.5(3) . . ?
 C61 N3 C62 120.8(4) . . ?
 C62 N3 Zn2 118.5(2) . . ?
 C70 N4 C71 122.2(9) . . ?
 C70 N4 C72 119.0(10) . . ?
 C72 N4 C71 118.8(10) . . ?
 C73 N5 C74 118.8(11) . . ?
 C75 N5 C73 120.1(13) . . ?
 C75 N5 C74 120.8(14) . . ?
 C77 N6 C76 121.0(17) . . ?
 C77 N6 C78 125.1(17) . . ?
 C78 N6 C76 113.5(16) . . ?
 O1 C6 C1 121.3(2) . . ?
 O1 C6 C5 118.4(2) . . ?
 C1 C6 C5 120.0 . . ?
 C6 C1 C2 120.0 . . ?
 C6 C1 C15 126.0(3) . . ?
 C2 C1 C15 113.9(3) . . ?
 C1 C2 H2 120.0 . . ?
 C3 C2 C1 120.0 . . ?
 C3 C2 H2 120.0 . . ?
 C2 C3 C11 120.2(6) . . ?
 C2 C3 C11A 120.7(8) . . ?
 C4 C3 C2 120.0 . . ?
 C4 C3 C11 118.6(6) . . ?
 C4 C3 C11A 119.0(8) . . ?
 C3 C4 H4 120.0 . . ?
 C3 C4 C5 120.0 . . ?
 C5 C4 H4 120.0 . . ?
 C6 C5 C7 121.2(3) . . ?
 C4 C5 C6 120.0 . . ?
 C4 C5 C7 118.7(3) . . ?
 C8 C7 C5 109.6(5) . . ?
 C8 C7 C9 110.7(6) . . ?
 C8 C7 C10 107.8(6) . . ?
 C9 C7 C5 110.8(5) . . ?
 C9 C7 C10 105.7(6) . . ?
 C10 C7 C5 112.1(5) . . ?
 C7 C8 H8A 109.5 . . ?
 C7 C8 H8B 109.5 . . ?
 C7 C8 H8C 109.5 . . ?
 H8A C8 H8B 109.5 . . ?
 H8A C8 H8C 109.5 . . ?
 H8B C8 H8C 109.5 . . ?
 C7 C9 H9A 109.5 . . ?
 C7 C9 H9B 109.5 . . ?
 C7 C9 H9C 109.5 . . ?
 H9A C9 H9B 109.5 . . ?
 H9A C9 H9C 109.5 . . ?
 H9B C9 H9C 109.5 . . ?
 C7 C10 H10A 109.5 . . ?
 C7 C10 H10B 109.5 . . ?
 C7 C10 H10C 109.5 . . ?
 H10A C10 H10B 109.5 . . ?
 H10A C10 H10C 109.5 . . ?
 H10B C10 H10C 109.5 . . ?
 C12 C11 C3 113.1(10) . . ?
 C12 C11 C14 110.3(12) . . ?
 C13 C11 C3 108.1(9) . . ?
 C13 C11 C12 109.1(11) . . ?
 C13 C11 C14 108.0(12) . . ?
 C14 C11 C3 108.1(15) . . ?
 C11 C12 H12A 109.5 . . ?
 C11 C12 H12B 109.5 . . ?
 C11 C12 H12C 109.5 . . ?
 H12A C12 H12B 109.5 . . ?
 H12A C12 H12C 109.5 . . ?
 H12B C12 H12C 109.5 . . ?
 C11 C13 H13A 109.5 . . ?
 C11 C13 H13B 109.5 . . ?
 C11 C13 H13C 109.5 . . ?
 H13A C13 H13B 109.5 . . ?
 H13A C13 H13C 109.5 . . ?
 H13B C13 H13C 109.5 . . ?
 C11 C14 H14A 109.5 . . ?
 C11 C14 H14B 109.5 . . ?
 C11 C14 H14C 109.5 . . ?
 H14A C14 H14B 109.5 . . ?
 H14A C14 H14C 109.5 . . ?
 H14B C14 H14C 109.5 . . ?
 N1 C15 C1 127.1(4) . . ?
 N1 C15 H15 116.5 . . ?
 C1 C15 H15 116.5 . . ?
 C17 C16 N1 116.1(3) . . ?
 C17 C16 C21 120.0 . . ?
 C21 C16 N1 123.8(3) . . ?
 O2 C17 C16 117.9(2) . . ?
 O2 C17 C18 121.5(2) . . ?
 C16 C17 C18 120.0 . . ?
 C17 C18 C24 118.4(2) . . ?
 C19 C18 C17 120.0 . . ?
 C19 C18 C24 120.7(2) . . ?
 C18 C19 C20 120.0 . . ?
 C18 C19 C23 121.5(3) . . ?
 C20 C19 C23 118.5(3) . . ?
 C19 C20 C22 121.5(3) . . ?
 C21 C20 C19 120.0 . . ?
 C21 C20 C22 118.1(3) . . ?
 C16 C21 H21 120.0 . . ?
 C20 C21 C16 120.0 . . ?
 C20 C21 H21 120.0 . . ?
 C20 C22 H22A 109.5 . . ?
 C20 C22 H22B 109.5 . . ?
 C20 C22 H22C 109.5 . . ?
 H22A C22 H22B 109.5 . . ?
 H22A C22 H22C 109.5 . . ?
 H22B C22 H22C 109.5 . . ?
 C19 C23 H23A 109.5 . . ?
 C19 C23 H23B 109.5 . . ?
 C19 C23 H23C 109.5 . . ?
 H23A C23 H23B 109.5 . . ?
 H23A C23 H23C 109.5 . . ?
 H23B C23 H23C 109.5 . . ?
 C25 C24 C18 118.3(2) . . ?
 C25 C24 C29 120.0 . . ?
 C29 C24 C18 121.5(2) . . ?
 O3 C25 C24 121.9(2) . . ?
 O3 C25 C26 118.1(2) . . ?
 C24 C25 C26 120.0 . . ?
 C25 C26 N2 116.3(2) . . ?
 C27 C26 N2 123.7(2) . . ?
 C27 C26 C25 120.0 . . ?
 C26 C27 H27 120.0 . . ?
 C26 C27 C28 120.0 . . ?
 C28 C27 H27 120.0 . . ?
 C27 C28 C31 117.4(3) . . ?
 C29 C28 C27 120.0 . . ?
 C29 C28 C31 122.6(3) . . ?
 C24 C29 C30 121.6(3) . . ?
 C28 C29 C24 120.0 . . ?
 C28 C29 C30 118.3(3) . . ?
 C29 C30 H30A 109.5 . . ?
 C29 C30 H30B 109.5 . . ?
 C29 C30 H30C 109.5 . . ?
 H30A C30 H30B 109.5 . . ?
 H30A C30 H30C 109.5 . . ?
 H30B C30 H30C 109.5 . . ?
 C28 C31 H31A 109.5 . . ?
 C28 C31 H31B 109.5 . . ?
 C28 C31 H31C 109.5 . . ?
 H31A C31 H31B 109.5 . . ?
 H31A C31 H31C 109.5 . . ?
 H31B C31 H31C 109.5 . . ?
 N2 C32 H32 116.1 . . ?
 N2 C32 C33 127.7(4) . . ?
 C33 C32 H32 116.1 . . ?
 C34 C33 C32 127.1(3) . . ?
 C34 C33 C38 120.0 . . ?
 C38 C33 C32 112.9(3) . . ?
 O4 C34 C33 121.5(3) . . ?
 O4 C34 C35 118.4(3) . . ?
 C35 C34 C33 120.0 . . ?
 C34 C35 C36 120.0 . . ?
 C34 C35 C43 122.1(3) . . ?
 C36 C35 C43 117.9(3) . . ?
 C35 C36 H36 120.0 . . ?
 C37 C36 C35 120.0 . . ?
 C37 C36 H36 120.0 . . ?
 C36 C37 C38 120.0 . . ?
 C36 C37 C39 118.6(14) . . ?
 C36 C37 C39A 121.8(6) . . ?
 C38 C37 C39 121.4(14) . . ?
 C38 C37 C39A 117.8(5) . . ?
 C33 C38 H38 120.0 . . ?
 C37 C38 C33 120.0 . . ?
 C37 C38 H38 120.0 . . ?
 C42 C39 C37 110(4) . . ?
 C42 C39 C40 111(2) . . ?
 C41 C39 C37 108(3) . . ?
 C41 C39 C42 112(2) . . ?
 C41 C39 C40 112(2) . . ?
 C40 C39 C37 104(3) . . ?
 C35 C43 C45 113.1(6) . . ?
 C44 C43 C35 108.4(6) . . ?
 C44 C43 C45 106.5(6) . . ?
 C46 C43 C35 110.6(5) . . ?
 C46 C43 C44 110.5(6) . . ?
 C46 C43 C45 107.6(7) . . ?
 C43 C44 H44A 109.5 . . ?
 C43 C44 H44B 109.5 . . ?
 C43 C44 H44C 109.5 . . ?
 H44A C44 H44B 109.5 . . ?
 H44A C44 H44C 109.5 . . ?
 H44B C44 H44C 109.5 . . ?
 C43 C45 H45A 109.5 . . ?
 C43 C45 H45B 109.5 . . ?
 C43 C45 H45C 109.5 . . ?
 H45A C45 H45B 109.5 . . ?
 H45A C45 H45C 109.5 . . ?
 H45B C45 H45C 109.5 . . ?
 C43 C46 H46A 109.5 . . ?
 C43 C46 H46B 109.5 . . ?
 C43 C46 H46C 109.5 . . ?
 H46A C46 H46B 109.5 . . ?
 H46A C46 H46C 109.5 . . ?
 H46B C46 H46C 109.5 . . ?
 O5 C47 C48 122.1(3) . . ?
 O5 C47 C52 117.9(3) . . ?
 C48 C47 C52 120.0 . . ?
 C47 C48 C61 125.9(3) . . ?
 C49 C48 C47 120.0 . . ?
 C49 C48 C61 114.0(3) . . ?
 C48 C49 H49 120.0 . . ?
 C48 C49 C50 120.0 . . ?
 C50 C49 H49 120.0 . . ?
 C49 C50 C57 117.2(6) . . ?
 C49 C50 C57A 123.2(15) . . ?
 C51 C50 C49 120.0 . . ?
 C51 C50 C57 122.8(6) . . ?
 C51 C50 C57A 116.5(15) . . ?
 C50 C51 H51 120.0 . . ?
 C50 C51 C52 120.0 . . ?
 C52 C51 H51 120.0 . . ?
 C47 C52 C53 122.2(4) . . ?
 C51 C52 C47 120.0 . . ?
 C51 C52 C53 117.8(4) . . ?
 C52 C53 C54 108.8(7) . . ?
 C52 C53 C55 111.7(6) . . ?
 C52 C53 C56 114.1(7) . . ?
 C55 C53 C54 109.1(8) . . ?
 C56 C53 C54 107.0(6) . . ?
 C56 C53 C55 105.9(8) . . ?
 C53 C54 H54A 109.5 . . ?
 C53 C54 H54B 109.5 . . ?
 C53 C54 H54C 109.5 . . ?
 H54A C54 H54B 109.5 . . ?
 H54A C54 H54C 109.5 . . ?
 H54B C54 H54C 109.5 . . ?
 C53 C55 H55A 109.5 . . ?
 C53 C55 H55B 109.5 . . ?
 C53 C55 H55C 109.5 . . ?
 H55A C55 H55B 109.5 . . ?
 H55A C55 H55C 109.5 . . ?
 H55B C55 H55C 109.5 . . ?
 C53 C56 H56A 109.5 . . ?
 C53 C56 H56B 109.5 . . ?
 C53 C56 H56C 109.5 . . ?
 H56A C56 H56B 109.5 . . ?
 H56A C56 H56C 109.5 . . ?
 H56B C56 H56C 109.5 . . ?
 C58 C57 C50 105.6(10) . . ?
 C58 C57 C59 109.6(12) . . ?
 C58 C57 C60 109.6(12) . . ?
 C59 C57 C50 107.3(10) . . ?
 C60 C57 C50 114.7(9) . . ?
 C60 C57 C59 109.9(12) . . ?
 C57 C58 H58A 109.5 . . ?
 C57 C58 H58B 109.5 . . ?
 C57 C58 H58C 109.5 . . ?
 H58A C58 H58B 109.5 . . ?
 H58A C58 H58C 109.5 . . ?
 H58B C58 H58C 109.5 . . ?
 C57 C59 H59A 109.5 . . ?
 C57 C59 H59B 109.5 . . ?
 C57 C59 H59C 109.5 . . ?
 H59A C59 H59B 109.5 . . ?
 H59A C59 H59C 109.5 . . ?
 H59B C59 H59C 109.5 . . ?
 C57 C60 H60A 109.5 . . ?
 C57 C60 H60B 109.5 . . ?
 C57 C60 H60C 109.5 . . ?
 H60A C60 H60B 109.5 . . ?
 H60A C60 H60C 109.5 . . ?
 H60B C60 H60C 109.5 . . ?
 N3 C61 C48 128.7(5) . . ?
 N3 C61 H61 115.7 . . ?
 C48 C61 H61 115.7 . . ?
 C63 C62 N3 116.8(2) . . ?
 C63 C62 C67 120.0 . . ?
 C67 C62 N3 123.2(2) . . ?
 O6 C63 C62 118.0(2) . . ?
 O6 C63 C64 122.0(2) . . ?
 C64 C63 C62 120.0 . . ?
 C63 C64 C64 118.8(2) . 2_756 ?
 C63 C64 C65 120.0 . . ?
 C65 C64 C64 120.72(17) . 2_756 ?
 C64 C65 C69 121.4(2) . . ?
 C66 C65 C64 120.0 . . ?
 C66 C65 C69 118.4(2) . . ?
 C65 C66 C67 120.0 . . ?
 C65 C66 C68 122.0(3) . . ?
 C67 C66 C68 117.9(3) . . ?
 C62 C67 H67 120.0 . . ?
 C66 C67 C62 120.0 . . ?
 C66 C67 H67 120.0 . . ?
 C66 C68 H68A 109.5 . . ?
 C66 C68 H68B 109.5 . . ?
 C66 C68 H68C 109.5 . . ?
 H68A C68 H68B 109.5 . . ?
 H68A C68 H68C 109.5 . . ?
 H68B C68 H68C 109.5 . . ?
 C65 C69 H69A 109.5 . . ?
 C65 C69 H69B 109.5 . . ?
 C65 C69 H69C 109.5 . . ?
 H69A C69 H69B 109.5 . . ?
 H69A C69 H69C 109.5 . . ?
 H69B C69 H69C 109.5 . . ?
 O8 C70 N4 124.5(9) . . ?
 O8 C70 H70 117.8 . . ?
 N4 C70 H70 117.8 . . ?
 N4 C71 H71A 109.5 . . ?
 N4 C71 H71B 109.5 . . ?
 N4 C71 H71C 109.5 . . ?
 H71A C71 H71B 109.5 . . ?
 H71A C71 H71C 109.5 . . ?
 H71B C71 H71C 109.5 . . ?
 N4 C72 H72A 109.5 . . ?
 N4 C72 H72B 109.5 . . ?
 N4 C72 H72C 109.5 . . ?
 H72A C72 H72B 109.5 . . ?
 H72A C72 H72C 109.5 . . ?
 H72B C72 H72C 109.5 . . ?
 N5 C73 H73 123.4 . . ?
 O9 C73 N5 113.2(15) . . ?
 O9 C73 H73 123.4 . . ?
 N5 C74 H74A 109.5 . . ?
 N5 C74 H74B 109.5 . . ?
 N5 C74 H74C 109.5 . . ?
 H74A C74 H74B 109.5 . . ?
 H74A C74 H74C 109.5 . . ?
 H74B C74 H74C 109.5 . . ?
 N5 C75 H75A 109.5 . . ?
 N5 C75 H75B 109.5 . . ?
 N5 C75 H75C 109.5 . . ?
 H75A C75 H75B 109.5 . . ?
 H75A C75 H75C 109.5 . . ?
 H75B C75 H75C 109.5 . . ?
 N6 C76 H76 112.8 . . ?
 O10 C76 N6 134(2) . . ?
 O10 C76 H76 112.8 . . ?
 N6 C77 H77A 109.5 . . ?
 N6 C77 H77B 109.5 . . ?
 N6 C77 H77C 109.5 . . ?
 H77A C77 H77B 109.5 . . ?
 H77A C77 H77C 109.5 . . ?
 H77B C77 H77C 109.5 . . ?
 N6 C78 H78A 109.5 . . ?
 N6 C78 H78B 109.5 . . ?
 N6 C78 H78C 109.5 . . ?
 H78A C78 H78B 109.5 . . ?
 H78A C78 H78C 109.5 . . ?
 H78B C78 H78C 109.5 . . ?
 N7 N7 C79 174(2) 7_557 . ?
 N7 N7 C80 60.3(17) 7_557 7_557 ?
 N7 N7 C80 60.9(14) 7_557 . ?
 C80 N7 C79 124.6(18) . . ?
 C80 N7 C79 114(2) 7_557 . ?
 C80 N7 C80 121.2(19) . 7_557 ?
 O11 C79 N7 109.9(17) . . ?
 N7 C80 N7 58.8(19) . 7_557 ?
 C39 C42 H42A 109.4 . . ?
 C39 C42 H42B 109.4 . . ?
 C39 C42 H42C 109.5 . . ?
 H42A C42 H42B 109.5 . . ?
 H42A C42 H42C 109.5 . . ?
 H42B C42 H42C 109.5 . . ?
 C39 C41 H41A 109.5 . . ?
 C39 C41 H41B 109.5 . . ?
 C39 C41 H41C 109.5 . . ?
 H41A C41 H41B 109.5 . . ?
 H41A C41 H41C 109.5 . . ?
 H41B C41 H41C 109.5 . . ?
 C39 C40 H40A 109.5 . . ?
 C39 C40 H40B 109.5 . . ?
 C39 C40 H40C 109.5 . . ?
 H40A C40 H40B 109.5 . . ?
 H40A C40 H40C 109.5 . . ?
 H40B C40 H40C 109.5 . . ?
 H59D C59A H59E 109.5 . . ?
 H59D C59A H59F 109.5 . . ?
 H59E C59A H59F 109.5 . . ?
 C57A C59A H59D 109.5 . . ?
 C57A C59A H59E 109.5 . . ?
 C57A C59A H59F 109.5 . . ?
 H60D C60A H60E 109.5 . . ?
 H60D C60A H60F 109.5 . . ?
 H60E C60A H60F 109.5 . . ?
 C57A C60A H60D 109.5 . . ?
 C57A C60A H60E 109.5 . . ?
 C57A C60A H60F 109.5 . . ?
 H58D C58A H58E 109.5 . . ?
 H58D C58A H58F 109.5 . . ?
 H58E C58A H58F 109.5 . . ?
 C57A C58A H58D 109.5 . . ?
 C57A C58A H58E 109.5 . . ?
 C57A C58A H58F 109.5 . . ?
 H14D C14A H14E 109.5 . . ?
 H14D C14A H14F 109.5 . . ?
 H14E C14A H14F 109.5 . . ?
 C11A C14A H14D 109.5 . . ?
 C11A C14A H14E 109.5 . . ?
 C11A C14A H14F 109.5 . . ?
 H12D C12A H12E 109.5 . . ?
 H12D C12A H12F 109.5 . . ?
 H12E C12A H12F 109.5 . . ?
 C11A C12A H12D 109.5 . . ?
 C11A C12A H12E 109.5 . . ?
 C11A C12A H12F 109.5 . . ?
 H13D C13A H13E 109.5 . . ?
 H13D C13A H13F 109.5 . . ?
 H13E C13A H13F 109.5 . . ?
 C11A C13A H13D 109.5 . . ?
 C11A C13A H13E 109.5 . . ?
 C11A C13A H13F 109.5 . . ?
 C14A C11A C3 114(2) . . ?
 C12A C11A C3 106.6(16) . . ?
 C12A C11A C14A 108.9(15) . . ?
 C13A C11A C3 108.5(17) . . ?
 C13A C11A C14A 109.9(15) . . ?
 C13A C11A C12A 109.0(15) . . ?
 H41D C41A H41E 109.5 . . ?
 H41D C41A H41F 109.5 . . ?
 H41E C41A H41F 109.5 . . ?
 C39A C41A H41D 109.5 . . ?
 C39A C41A H41E 109.5 . . ?
 C39A C41A H41F 109.5 . . ?
 H40D C40A H40E 109.5 . . ?
 H40D C40A H40F 109.5 . . ?
 H40E C40A H40F 109.5 . . ?
 C39A C40A H40D 109.5 . . ?
 C39A C40A H40E 109.5 . . ?
 C39A C40A H40F 109.5 . . ?
 H42D C42A H42E 109.5 . . ?
 H42D C42A H42F 109.5 . . ?
 H42E C42A H42F 109.5 . . ?
 C39A C42A H42D 109.5 . . ?
 C39A C42A H42E 109.5 . . ?
 C39A C42A H42F 109.5 . . ?
 C59A C57A C50 111(2) . . ?
 C59A C57A C60A 111.6(18) . . ?
 C59A C57A C58A 110.4(17) . . ?
 C60A C57A C50 109(3) . . ?
 C60A C57A C58A 111.1(18) . . ?
 C58A C57A C50 103(3) . . ?
 C41A C39A C37 109.8(11) . . ?
 C41A C39A C40A 109.8(11) . . ?
 C41A C39A C42A 108.4(11) . . ?
 C40A C39A C37 108.9(10) . . ?
 C42A C39A C37 110.5(14) . . ?
 C42A C39A C40A 109.5(12) . . ?

loop_
  _geom_torsion_atom_site_label_1
  _geom_torsion_atom_site_label_2
  _geom_torsion_atom_site_label_3
  _geom_torsion_atom_site_label_4
  _geom_torsion
  _geom_torsion_site_symmetry_1
  _geom_torsion_site_symmetry_2
  _geom_torsion_site_symmetry_3
  _geom_torsion_site_symmetry_4
  _geom_torsion_publ_flag
 Zn1 O2 C17 C16 -106.6(2) . . . . ?
 Zn1 O2 C17 C18 64.7(3) . . . . ?
 Zn1 O3 C25 C24 71.3(3) . . . . ?
 Zn1 O3 C25 C26 -107.4(2) . . . . ?
 Zn1 O6 C63 C62 -106.3(2) . . . . ?
 Zn1 O6 C63 C64 73.0(3) . . . . ?
 Zn2 O2 C17 C16 107.5(3) . . . . ?
 Zn2 O2 C17 C18 -81.2(3) . . . . ?
 Zn2 O5 C47 C48 6.7(6) . . . . ?
 Zn2 O5 C47 C52 -175.2(3) . . . . ?
 Zn2 O6 C63 C62 2.2(3) . . . . ?
 Zn2 O6 C63 C64 -178.49(15) . . . . ?
 Zn2 N3 C61 C48 -8.6(7) . . . . ?
 Zn2 N3 C62 C63 -2.9(4) . . . . ?
 Zn2 N3 C62 C67 177.89(18) . . . . ?
 Zn3 O3 C25 C24 -178.86(15) 2_756 . . . ?
 Zn3 O3 C25 C26 2.5(3) 2_756 . . . ?
 Zn3 O4 C34 C33 2.3(5) 2_756 . . . ?
 Zn3 O4 C34 C35 -175.5(2) 2_756 . . . ?
 Zn3 O6 C63 C62 111.2(2) . . . . ?
 Zn3 O6 C63 C64 -69.5(3) . . . . ?
 Zn3 N2 C26 C25 2.3(4) 2_756 . . . ?
 Zn3 N2 C26 C27 -179.69(18) 2_756 . . . ?
 Zn3 N2 C32 C33 -3.7(7) 2_756 . . . ?
 Zn4 O1 C6 C1 -7.0(5) . . . . ?
 Zn4 O1 C6 C5 166.5(2) . . . . ?
 Zn4 O2 C17 C16 0.0(3) . . . . ?
 Zn4 O2 C17 C18 171.35(17) . . . . ?
 Zn4 O3 C25 C24 -72.8(3) 2_756 . . . ?
 Zn4 O3 C25 C26 108.5(2) 2_756 . . . ?
 Zn4 N1 C15 C1 7.7(8) . . . . ?
 Zn4 N1 C16 C17 19.6(4) . . . . ?
 Zn4 N1 C16 C21 -163.6(2) . . . . ?
 O1 C6 C1 C2 173.4(4) . . . . ?
 O1 C6 C1 C15 -9.8(5) . . . . ?
 O1 C6 C5 C4 -173.6(4) . . . . ?
 O1 C6 C5 C7 9.3(5) . . . . ?
 O2 C17 C18 C19 -171.1(3) . . . . ?
 O2 C17 C18 C24 19.8(3) . . . . ?
 O3 C25 C26 N2 -3.2(3) . . . . ?
 O3 C25 C26 C27 178.7(3) . . . . ?
 O4 C34 C35 C36 177.8(4) . . . . ?
 O4 C34 C35 C43 -4.2(5) . . . . ?
 O5 C47 C48 C49 178.0(4) . . . . ?
 O5 C47 C48 C61 -2.7(5) . . . . ?
 O5 C47 C52 C51 -178.1(4) . . . . ?
 O5 C47 C52 C53 1.9(6) . . . . ?
 O6 C63 C64 C64 8.6(4) . . . 2_756 ?
 O6 C63 C64 C65 -179.3(3) . . . . ?
 N1 C16 C17 O2 -11.6(4) . . . . ?
 N1 C16 C17 C18 176.9(3) . . . . ?
 N1 C16 C21 C20 -176.7(4) . . . . ?
 N2 C26 C27 C28 -178.0(3) . . . . ?
 N2 C32 C33 C34 -2.0(7) . . . . ?
 N2 C32 C33 C38 178.6(5) . . . . ?
 N3 C62 C63 O6 0.1(3) . . . . ?
 N3 C62 C63 C64 -179.2(3) . . . . ?
 N3 C62 C67 C66 179.2(3) . . . . ?
 C6 C1 C2 C3 0.0 . . . . ?
 C6 C1 C15 N1 9.3(8) . . . . ?
 C6 C5 C7 C8 -68.1(6) . . . . ?
 C6 C5 C7 C9 54.4(6) . . . . ?
 C6 C5 C7 C10 172.2(5) . . . . ?
 C1 C6 C5 C4 0.0 . . . . ?
 C1 C6 C5 C7 -177.1(5) . . . . ?
 C1 C2 C3 C4 0.0 . . . . ?
 C1 C2 C3 C11 -167.4(9) . . . . ?
 C1 C2 C3 C11A 173.4(13) . . . . ?
 C2 C1 C15 N1 -173.8(5) . . . . ?
 C2 C3 C4 C5 0.0 . . . . ?
 C2 C3 C11 C12 102.9(14) . . . . ?
 C2 C3 C11 C13 -136.2(13) . . . . ?
 C2 C3 C11 C14 -19.5(17) . . . . ?
 C2 C3 C11A C14A 22(3) . . . . ?
 C2 C3 C11A C12A 142(2) . . . . ?
 C2 C3 C11A C13A -101(2) . . . . ?
 C3 C4 C5 C6 0.0 . . . . ?
 C3 C4 C5 C7 177.2(4) . . . . ?
 C4 C3 C11 C12 -64.7(12) . . . . ?
 C4 C3 C11 C13 56.3(13) . . . . ?
 C4 C3 C11 C14 172.9(12) . . . . ?
 C4 C3 C11A C14A -164.4(16) . . . . ?
 C4 C3 C11A C12A -44(2) . . . . ?
 C4 C3 C11A C13A 72.9(18) . . . . ?
 C4 C5 C7 C8 114.7(5) . . . . ?
 C4 C5 C7 C9 -122.8(5) . . . . ?
 C4 C5 C7 C10 -5.0(7) . . . . ?
 C5 C6 C1 C2 0.0 . . . . ?
 C5 C6 C1 C15 176.8(5) . . . . ?
 C11 C3 C4 C5 167.6(8) . . . . ?
 C15 N1 C16 C17 -155.6(4) . . . . ?
 C15 N1 C16 C21 21.3(6) . . . . ?
 C15 C1 C2 C3 -177.2(4) . . . . ?
 C16 N1 C15 C1 -177.3(5) . . . . ?
 C16 C17 C18 C19 0.0 . . . . ?
 C16 C17 C18 C24 -169.1(3) . . . . ?
 C17 C16 C21 C20 0.0 . . . . ?
 C17 C18 C19 C20 0.0 . . . . ?
 C17 C18 C19 C23 177.6(4) . . . . ?
 C17 C18 C24 C25 -74.2(3) . . . . ?
 C17 C18 C24 C29 110.8(2) . . . . ?
 C18 C19 C20 C21 0.0 . . . . ?
 C18 C19 C20 C22 173.5(5) . . . . ?
 C18 C24 C25 O3 6.2(3) . . . . ?
 C18 C24 C25 C26 -175.2(3) . . . . ?
 C18 C24 C29 C28 175.0(3) . . . . ?
 C18 C24 C29 C30 -7.5(4) . . . . ?
 C19 C18 C24 C25 116.8(2) . . . . ?
 C19 C18 C24 C29 -58.3(3) . . . . ?
 C19 C20 C21 C16 0.0 . . . . ?
 C21 C16 C17 O2 171.4(3) . . . . ?
 C21 C16 C17 C18 0.0 . . . . ?
 C22 C20 C21 C16 -173.7(5) . . . . ?
 C23 C19 C20 C21 -177.7(4) . . . . ?
 C23 C19 C20 C22 -4.2(6) . . . . ?
 C24 C18 C19 C20 168.8(3) . . . . ?
 C24 C18 C19 C23 -13.6(4) . . . . ?
 C24 C25 C26 N2 178.1(3) . . . . ?
 C24 C25 C26 C27 0.0 . . . . ?
 C25 C24 C29 C28 0.0 . . . . ?
 C25 C24 C29 C30 177.5(4) . . . . ?
 C25 C26 C27 C28 0.0 . . . . ?
 C26 N2 C32 C33 178.2(4) . . . . ?
 C26 C27 C28 C29 0.0 . . . . ?
 C26 C27 C28 C31 178.8(4) . . . . ?
 C27 C28 C29 C24 0.0 . . . . ?
 C27 C28 C29 C30 -177.6(4) . . . . ?
 C29 C24 C25 O3 -178.7(3) . . . . ?
 C29 C24 C25 C26 0.0 . . . . ?
 C31 C28 C29 C24 -178.7(4) . . . . ?
 C31 C28 C29 C30 3.7(5) . . . . ?
 C32 N2 C26 C25 -179.7(4) . . . . ?
 C32 N2 C26 C27 -1.6(5) . . . . ?
 C32 C33 C34 O4 2.9(5) . . . . ?
 C32 C33 C34 C35 -179.4(4) . . . . ?
 C32 C33 C38 C37 179.5(4) . . . . ?
 C33 C34 C35 C36 0.0 . . . . ?
 C33 C34 C35 C43 178.1(5) . . . . ?
 C34 C33 C38 C37 0.0 . . . . ?
 C34 C35 C36 C37 0.0 . . . . ?
 C34 C35 C43 C44 -61.5(6) . . . . ?
 C34 C35 C43 C45 -179.4(6) . . . . ?
 C34 C35 C43 C46 59.8(7) . . . . ?
 C35 C36 C37 C38 0.0 . . . . ?
 C35 C36 C37 C39 177.5(15) . . . . ?
 C35 C36 C37 C39A -172.4(7) . . . . ?
 C36 C35 C43 C44 116.6(5) . . . . ?
 C36 C35 C43 C45 -1.3(8) . . . . ?
 C36 C35 C43 C46 -122.1(5) . . . . ?
 C36 C37 C38 C33 0.0 . . . . ?
 C36 C37 C39 C42 174(2) . . . . ?
 C36 C37 C39 C41 -64(3) . . . . ?
 C36 C37 C39 C40 55(3) . . . . ?
 C36 C37 C39A C41A -31.9(13) . . . . ?
 C36 C37 C39A C40A 88.3(12) . . . . ?
 C36 C37 C39A C42A -151.4(9) . . . . ?
 C38 C33 C34 O4 -177.7(4) . . . . ?
 C38 C33 C34 C35 0.0 . . . . ?
 C38 C37 C39 C42 -9(3) . . . . ?
 C38 C37 C39 C41 113(2) . . . . ?
 C38 C37 C39 C40 -128(2) . . . . ?
 C38 C37 C39A C41A 155.6(9) . . . . ?
 C38 C37 C39A C40A -84.2(12) . . . . ?
 C38 C37 C39A C42A 36.1(12) . . . . ?
 C39 C37 C38 C33 -177.4(16) . . . . ?
 C43 C35 C36 C37 -178.1(5) . . . . ?
 C47 C48 C49 C50 0.0 . . . . ?
 C47 C48 C61 N3 4.3(8) . . . . ?
 C47 C52 C53 C54 -66.2(8) . . . . ?
 C47 C52 C53 C55 54.4(7) . . . . ?
 C47 C52 C53 C56 174.5(6) . . . . ?
 C48 C47 C52 C51 0.0 . . . . ?
 C48 C47 C52 C53 180.0(5) . . . . ?
 C48 C49 C50 C51 0.0 . . . . ?
 C48 C49 C50 C57 -179.6(7) . . . . ?
 C48 C49 C50 C57A -173.9(18) . . . . ?
 C49 C48 C61 N3 -176.4(5) . . . . ?
 C49 C50 C51 C52 0.0 . . . . ?
 C49 C50 C57 C58 -117.7(13) . . . . ?
 C49 C50 C57 C59 125.4(13) . . . . ?
 C49 C50 C57 C60 3.0(16) . . . . ?
 C49 C50 C57A C59A -179(2) . . . . ?
 C49 C50 C57A C60A 58(3) . . . . ?
 C49 C50 C57A C58A -61(3) . . . . ?
 C50 C51 C52 C47 0.0 . . . . ?
 C50 C51 C52 C53 -180.0(5) . . . . ?
 C51 C50 C57 C58 62.7(14) . . . . ?
 C51 C50 C57 C59 -54.1(15) . . . . ?
 C51 C50 C57 C60 -176.5(12) . . . . ?
 C51 C50 C57A C59A 7(3) . . . . ?
 C51 C50 C57A C60A -117(3) . . . . ?
 C51 C50 C57A C58A 125(3) . . . . ?
 C51 C52 C53 C54 113.8(6) . . . . ?
 C51 C52 C53 C55 -125.7(5) . . . . ?
 C51 C52 C53 C56 -5.5(9) . . . . ?
 C52 C47 C48 C49 0.0 . . . . ?
 C52 C47 C48 C61 179.3(4) . . . . ?
 C57 C50 C51 C52 179.5(8) . . . . ?
 C61 N3 C62 C63 172.9(4) . . . . ?
 C61 N3 C62 C67 -6.3(5) . . . . ?
 C61 C48 C49 C50 -179.4(4) . . . . ?
 C62 N3 C61 C48 175.7(4) . . . . ?
 C62 C63 C64 C64 -172.1(4) . . . 2_756 ?
 C62 C63 C64 C65 0.0 . . . . ?
 C63 C62 C67 C66 0.0 . . . . ?
 C63 C64 C65 C66 0.0 . . . . ?
 C63 C64 C65 C69 174.6(3) . . . . ?
 C64 C64 C65 C66 171.9(4) 2_756 . . . ?
 C64 C64 C65 C69 -13.5(4) 2_756 . . . ?
 C64 C65 C66 C67 0.0 . . . . ?
 C64 C65 C66 C68 -177.9(4) . . . . ?
 C65 C66 C67 C62 0.0 . . . . ?
 C67 C62 C63 O6 179.3(3) . . . . ?
 C67 C62 C63 C64 0.0 . . . . ?
 C68 C66 C67 C62 178.0(4) . . . . ?
 C69 C65 C66 C67 -174.7(3) . . . . ?
 C69 C65 C66 C68 7.3(5) . . . . ?
 C71 N4 C70 O8 -178.3(10) . . . . ?
 C72 N4 C70 O8 0.0(15) . . . . ?
 C74 N5 C73 O9 -174.2(10) . . . . ?
 C75 N5 C73 O9 -1.2(16) . . . . ?
 C77 N6 C76 O10 -179(3) . . . . ?
 C78 N6 C76 O10 8(4) . . . . ?
 C79 N7 C80 N7 177(3) . . . 7_557 ?
 C80 N7 C79 O11 177(2) 7_557 . . . ?
 C80 N7 C79 O11 0(2) . . . . ?
 C80 N7 C80 N7 0.005(9) 7_557 . . 7_557 ?
 C11A C3 C4 C5 -173.5(13) . . . . ?
 C57A C50 C51 C52 174.3(17) . . . . ?
 C39A C37 C38 C33 172.7(7) . . . . ?

_shelx_res_file
;
    sad.res created by SHELXL-2014/7

TITL JD034_0m in C2/c
CELL 1.54178 20.7405 24.232 32.6921 90 97.999 90
ZERR 4 0.0004 0.0005 0.0005 0 0.001 0
LATT 7
SYMM -X,+Y,0.5-Z
SFAC C H N O Zn
UNIT 636 840 52 84 28
DFIX 2.5 C13 C12
DFIX 2.5 C60 C58
DFIX 2.5 C58 C59
DFIX 2.5 C59 C60
DFIX 1.51 C60 C57 C58 C57 C59 C57
DFIX 3.2 C68 C69
DFIX 2.5 C12A C13A
DFIX 2.5 C60A C58A
DFIX 2.5 C59A C58A
DFIX 2.5 C60A C59A
DFIX 1.53 C57 C50
DFIX 2.5 C12A C14A
DFIX 2.5 C14A C13A
DFIX 2.5 C42A C40A
DFIX 2.5 C40 C42
DFIX 2.5 C41A C42A
DFIX 2.5 C41A C40A
DFIX 1.51 C42A C39A C40A C39A C41A C39A
DFIX 2.5 C41 C40
DFIX 2.5 C42 C41
DFIX 1.51 C42 C39 C40 C39 C41 C39
DFIX 1.51 C58A C57A C59A C57A C60A C57A
DFIX 1.53 C57A C50
DFIX 1.49 N7 C79
DFIX 2.65 C80 C79
DFIX 1.45 C80 N7
DFIX 1.61 N4 C72
DFIX 1.55 N4 C71
DFIX 1.8 N4 C70
DFIX 1.25 C79 O11
DFIX 2.2984 O11 N7
DFIX 2.6 O10 N6
DFIX 2.3 N6 O10
DFIX 2.5 C14 C13
DFIX 2.5 C12 C14
DFIX 1.53 C3 C11
DFIX 1.53 C11 C3 C11A C3
DFIX 1.51 C13 C11 C12 C11 C14 C11
DFIX 1.51 C12A C11A C12 C11 C13 C11 C13A C11A C14 C11 C14A C11A
DFIX 1.55 N6 C78
DFIX 1.55 N6 C77
DFIX 1.59 N6 C76
DFIX 1.25 O10 C76
DFIX 2.6 C76 C77
DFIX 1.59 N5 C75
DFIX 1.56 N5 C74
DFIX 1.7 N5 C73
FLAT N7 C79 C80 O11
FLAT N6 C76 C77 C78
DELU C75 N5
DELU N5 C74
DELU C73 N5
DELU C72 N4
DELU C71 N4
DELU N4 C70
DELU C79 O11
DELU N6 C78
DELU C76 N6
DELU O10 C76
DELU N6 C77
SIMU 0.02 0.08 1.7 C57 C58
SIMU 0.02 0.08 1.7 C57 C59
SIMU 0.02 0.08 1.7 C57 C60
SIMU 0.01 0.08 1.7 C50 C57
SIMU 0.01 0.08 1.7 C3 C11A
SIMU 0.01 0.08 1.7 C14A > C11A C11A C11A
SIMU 0.01 0.08 1.7 C39 C40
SIMU 0.01 0.08 1.7 C37 C39
SIMU 0.01 0.08 1.7 C39 C42
SIMU 0.01 0.08 1.7 C41A C39A
SIMU 0.01 0.08 1.7 C39 C41
SIMU 0.01 0.08 1.7 C50 C57A
SIMU 0.01 0.08 1.7 C60A C57A
SIMU 0.01 0.08 1.7 C58A C57A
SIMU 0.01 0.08 1.7 C59A C57A
SIMU 0.04 0.08 1.7 N7 > O11
SIMU 0.04 0.08 1.7 O8 N4 C70 > C72
SIMU 0.01 0.08 1.7 C11 C11 C11 > C14
SIMU 0.04 0.08 1.7 N6 C76 C77 C78 O10
SIMU 0.01 0.02 2 N5 C73 C74 C75 O9
RIGU C57 C59
RIGU C57 C60
RIGU C57 C58
RIGU C50 C57
RIGU C12A C11A
RIGU C3 C11A
RIGU C13A C11A
RIGU C42 C42A
RIGU 0.001 0.001 C39 C40
RIGU 0.001 0.001 C37 C39
RIGU 0.001 0.001 C39 C42
RIGU 0.001 0.001 C39 C41
RIGU 0.001 0.001 C41 C41A
RIGU C50 C57A
RIGU C60A C57A
RIGU 0.001 0.001 C58A C57A
RIGU 0.001 0.001 C59A C57A
RIGU C11 C12
RIGU 0.001 0.001 C11 C14
ISOR 0.01 0.02 C14A
ISOR 0.0001 0.2 C14
EADP C41 C41A
EADP C42A C42
EADP C77 C78 C76 N6

L.S. 10
PLAN  100
SIZE 0.2 0.2 0.2
TEMP 23
BOND
MORE -1
BOND $H
CONF
fmap 2
acta
OMIT -3 110
OMIT 5 15 8
OMIT 6 14 8
OMIT 3 17 1
OMIT 5 5 2
OMIT 7 15 2
OMIT -6 16 1
OMIT 6 14 9
OMIT 0 14 15
OMIT 3 15 14
OMIT 0 2 0
OMIT -7 21 17
OMIT 1 25 7
OMIT 1 25 5
REM <olex2.extras>
REM <HklSrc "%.\\sad.hkl">
REM </olex2.extras>

WGHT    0.086000   66.960503
FVAR       0.11066   0.80157   0.64648   0.25594
ZN1   5    1.000000    0.127986    0.750000    10.50000    0.03886    0.02332 =
         0.03650    0.00000    0.00129    0.00000
ZN2   5    0.843146    0.135200    0.741760    11.00000    0.04114    0.03409 =
         0.05027    0.00168    0.00575   -0.00737
ZN3   5    0.914552    0.192173    0.674111    11.00000    0.04255    0.02858 =
         0.04167    0.00432    0.00516    0.00196
ZN4   5    0.905243    0.064203    0.677703    11.00000    0.05413    0.02792 =
         0.04576   -0.00185   -0.00277   -0.00554
O1    4    0.891284    0.040374    0.620726    11.00000    0.07593    0.03897 =
         0.04429    0.00417   -0.00052   -0.01060
O2    4    0.915653    0.078814    0.748844    11.00000    0.04666    0.02854 =
         0.03860    0.00231    0.00106   -0.00510
O3    4    1.018211    0.115388    0.813325    11.00000    0.04150    0.02365 =
         0.03788   -0.00007    0.00313   -0.00272
O4    4    1.137232    0.255409    0.845928    11.00000    0.05176    0.03649 =
         0.06371   -0.01285    0.00735   -0.01156
O5    4    0.764610    0.096763    0.750453    11.00000    0.05962    0.06200 =
         0.07541   -0.00083    0.01119   -0.02469
O6    4    0.931144    0.191857    0.737132    11.00000    0.03364    0.02550 =
         0.04174   -0.00249    0.00623   -0.00093
O7    4    0.848153    0.132474    0.680397    11.00000    0.04375    0.03606 =
         0.04695    0.00288   -0.00079   -0.00414
O8    4    0.731355    0.132795    0.633884    11.00000    0.09838    0.09530 =
         0.13124   -0.01140   -0.02630   -0.00267
N1    3    0.894770   -0.010247    0.700584    11.00000    0.06252    0.03881 =
         0.04122   -0.00303   -0.00325   -0.00809
N2    3    1.018824    0.202030    0.863904    11.00000    0.04534    0.03050 =
         0.03985   -0.00246    0.00475   -0.00756
N3    3    0.833176    0.194438    0.782708    11.00000    0.03667    0.04158 =
         0.05117    0.00893    0.01044   -0.00524
N4    3    0.667211    0.059120    0.607289    11.00000    0.07278    0.14220 =
         0.09571   -0.01401    0.00231   -0.01039
N5    3    0.647938    0.251078    0.744461    11.00000    0.14736    0.12983 =
         0.15817    0.07012    0.03645    0.04227
N6    3    0.499188    0.299873    0.965964    11.00000    0.23553    0.41707 =
         0.25347   -0.05131   -0.03955   -0.01154
AFIX  66
C6    1    0.863819   -0.007574    0.606204    11.00000    0.06062    0.03520 =
         0.04930   -0.00647    0.00149   -0.00910
C1    1    0.848278   -0.048696    0.632821    11.00000    0.06938    0.03679 =
         0.04510   -0.01260    0.00339   -0.01014
C2    1    0.814060   -0.095131    0.617113    11.00000    0.09248    0.04241 =
         0.05310   -0.00404    0.00768   -0.01865
AFIX  43
H2    2    0.803662   -0.122644    0.634922    11.00000   -1.20000
AFIX  65
C3    1    0.795380   -0.100444    0.574788    11.00000    0.10292    0.06282 =
         0.05163   -0.01968    0.00561   -0.02719
C4    1    0.810920   -0.059322    0.548171    11.00000    0.09411    0.06073 =
         0.04670   -0.00807    0.00420   -0.01312
AFIX  43
H4    2    0.798422   -0.062877    0.519852    11.00000   -1.20000
AFIX  65
C5    1    0.845139   -0.012887    0.563878    11.00000    0.06877    0.05260 =
         0.04588   -0.00315   -0.00044   -0.00701
AFIX   0
C7    1    0.864664    0.031321    0.532941    11.00000    0.09088    0.05514 =
         0.04484    0.00461   -0.00164   -0.00863
C8    1    0.829248    0.084890    0.538480    11.00000    0.13045    0.05812 =
         0.08522    0.01686   -0.00038    0.00854
AFIX  33
H8A   2    0.783141    0.078388    0.534451    11.00000   -1.50000
H8B   2    0.842370    0.098809    0.565867    11.00000   -1.50000
H8C   2    0.839788    0.111423    0.518634    11.00000   -1.50000
AFIX   0
C9    1    0.937922    0.040327    0.539147    11.00000    0.10058    0.09783 =
         0.06819    0.02334    0.01684   -0.01298
AFIX  33
H9A   2    0.959493    0.005983    0.535520    11.00000   -1.50000
H9B   2    0.948973    0.066650    0.519304    11.00000   -1.50000
H9C   2    0.951556    0.054036    0.566537    11.00000   -1.50000
AFIX   0
C10   1    0.846855    0.013023    0.487479    11.00000    0.16274    0.10633 =
         0.04859    0.00702    0.00230   -0.03291
AFIX  33
H10A  2    0.868745   -0.020944    0.483142    11.00000   -1.50000
H10B  2    0.800643    0.007675    0.481481    11.00000   -1.50000
H10C  2    0.860118    0.040973    0.469580    11.00000   -1.50000
AFIX   0
PART 1
C11   1    0.744467   -0.146368    0.557296    31.00000    0.11946    0.08560 =
         0.07385   -0.02949    0.03032   -0.06100
C12   1    0.676538   -0.123407    0.543743    31.00000    0.12184    0.11401 =
         0.19133   -0.05648   -0.01211   -0.05615
AFIX 137
H12A  2    0.678860   -0.094188    0.524171    31.00000   -1.50000
H12B  2    0.659077   -0.109320    0.567360    31.00000   -1.50000
H12C  2    0.648836   -0.152231    0.531151    31.00000   -1.50000
AFIX   0
C13   1    0.769033   -0.173616    0.520622    31.00000    0.21781    0.12942 =
         0.10587   -0.07309    0.06878   -0.10534
AFIX 137
H13A  2    0.736669   -0.198750    0.507675    31.00000   -1.50000
H13B  2    0.808423   -0.193464    0.529884    31.00000   -1.50000
H13C  2    0.777547   -0.145869    0.501108    31.00000   -1.50000
AFIX   0
C14   1    0.742613   -0.190143    0.590838    31.00000    0.34799    0.14617 =
         0.10204    0.00972   -0.03651   -0.17465
AFIX 137
H14A  2    0.711010   -0.217830    0.581198    31.00000   -1.50000
H14B  2    0.730911   -0.173127    0.615284    31.00000   -1.50000
H14C  2    0.784754   -0.206939    0.597080    31.00000   -1.50000
AFIX   0
PART 0
C15   1    0.867240   -0.050018    0.677223    11.00000    0.07791    0.03069 =
         0.04999    0.01316    0.00134   -0.00974
AFIX  43
H15   2    0.858958   -0.082631    0.690556    11.00000   -1.20000
AFIX  66
C16   1    0.913085   -0.018694    0.743633    11.00000    0.06295    0.02085 =
         0.04650   -0.00351   -0.00385   -0.00809
C17   1    0.917436    0.028359    0.768180    11.00000    0.04651    0.03223 =
         0.04396    0.00879    0.00011   -0.01163
C18   1    0.932027    0.023683    0.810842    11.00000    0.05257    0.02159 =
         0.04459    0.00045   -0.00087   -0.01164
C19   1    0.942268   -0.028047    0.828955    11.00000    0.06418    0.03885 =
         0.04259    0.00864   -0.00359   -0.01356
C20   1    0.937917   -0.075101    0.804408    11.00000    0.08571    0.02945 =
         0.05864    0.00667   -0.00849   -0.00846
C21   1    0.923326   -0.070425    0.761747    11.00000    0.08834    0.02907 =
         0.05685   -0.00186   -0.00717   -0.01270
AFIX  43
H21   2    0.920415   -0.101908    0.745323    11.00000   -1.20000
AFIX   0
C22   1    0.955693   -0.131747    0.822526    11.00000    0.15319    0.02509 =
         0.06876    0.01128   -0.01631   -0.00632
AFIX 137
H22A  2    1.001096   -0.132435    0.833491    11.00000   -1.50000
H22B  2    0.947016   -0.159203    0.801305    11.00000   -1.50000
H22C  2    0.930194   -0.139382    0.844226    11.00000   -1.50000
AFIX   0
C23   1    0.960919   -0.034618    0.875431    11.00000    0.08483    0.03965 =
         0.05176    0.01107   -0.00598   -0.01616
AFIX 137
H23A  2    0.964826    0.001134    0.888186    11.00000   -1.50000
H23B  2    1.001779   -0.053678    0.880966    11.00000   -1.50000
H23C  2    0.927905   -0.055452    0.886432    11.00000   -1.50000
AFIX  66
C24   1    0.924329    0.074838    0.837281    11.00000    0.05499    0.02620 =
         0.03561    0.00606    0.00057   -0.01030
C25   1    0.970491    0.116554    0.838100    11.00000    0.04386    0.03030 =
         0.03229    0.00312    0.00291   -0.00477
C26   1    0.968020    0.161679    0.864085    11.00000    0.04547    0.03211 =
         0.03743    0.00285    0.00417   -0.00541
C27   1    0.919387    0.165089    0.889252    11.00000    0.06186    0.04308 =
         0.04285   -0.00015    0.01683   -0.00494
AFIX  43
H27   2    0.917735    0.195280    0.906637    11.00000   -1.20000
AFIX  65
C28   1    0.873225    0.123373    0.888433    11.00000    0.05562    0.04290 =
         0.04527    0.01042    0.01262   -0.00988
C29   1    0.875695    0.078247    0.862448    11.00000    0.05334    0.04552 =
         0.04098    0.00893    0.00355   -0.01377
AFIX   0
C30   1    0.822654    0.034572    0.861231    11.00000    0.06495    0.06252 =
         0.06128    0.01097    0.01084   -0.02411
AFIX  33
H30A  2    0.830337    0.006009    0.842141    11.00000   -1.50000
H30B  2    0.823202    0.018988    0.888275    11.00000   -1.50000
H30C  2    0.780989    0.051189    0.852510    11.00000   -1.50000
AFIX   0
C31   1    0.822175    0.128969    0.917326    11.00000    0.07225    0.07317 =
         0.06711   -0.00248    0.02968   -0.01566
AFIX  33
H31A  2    0.828928    0.162881    0.932499    11.00000   -1.50000
H31B  2    0.779576    0.129090    0.901481    11.00000   -1.50000
H31C  2    0.825778    0.098471    0.936249    11.00000   -1.50000
AFIX   0
C32   1    1.019822    0.245134    0.887558    11.00000    0.05540    0.04642 =
         0.04737   -0.00752    0.01324   -0.00566
AFIX  43
H32   2    0.985847    0.248124    0.903233    11.00000   -1.20000
AFIX  66
C33   1    1.067274    0.288874    0.892415    11.00000    0.05883    0.03490 =
         0.04679   -0.00585    0.00454   -0.00528
C34   1    1.123059    0.293042    0.873466    11.00000    0.05214    0.02783 =
         0.05452   -0.00272   -0.00033   -0.00506
C35   1    1.164481    0.337968    0.881774    11.00000    0.05785    0.04803 =
         0.08017   -0.00665    0.00202   -0.01000
C36   1    1.150120    0.378727    0.909030    11.00000    0.07674    0.04493 =
         0.09924   -0.02361    0.00601   -0.01239
AFIX  43
H36   2    1.177834    0.408785    0.914589    11.00000   -1.20000
AFIX  65
C37   1    1.094335    0.374559    0.927979    11.00000    0.09115    0.04984 =
         0.07900   -0.02566    0.00503   -0.00957
C38   1    1.052912    0.329633    0.919672    11.00000    0.07528    0.04403 =
         0.06457   -0.01327    0.01204   -0.00511
AFIX  43
H38   2    1.015588    0.326845    0.932350    11.00000   -1.20000
AFIX   0
PART 1
C39   1    1.080868    0.421328    0.960851    41.00000    0.11732    0.06687 =
         0.09759   -0.04307    0.01418   -0.00718
PART 0
C43   1    1.228421    0.343751    0.862552    11.00000    0.05765    0.05763 =
         0.12008   -0.02344    0.01414   -0.02236
C44   1    1.273269    0.294506    0.877202    11.00000    0.06134    0.09552 =
         0.13842   -0.01504    0.00083   -0.00641
AFIX  33
H44A  2    1.281801    0.294372    0.906826    11.00000   -1.50000
H44B  2    1.252256    0.260633    0.867756    11.00000   -1.50000
H44C  2    1.313574    0.297963    0.866112    11.00000   -1.50000
AFIX   0
C45   1    1.267188    0.396804    0.876534    11.00000    0.10541    0.08768 =
         0.22460   -0.05799    0.06264   -0.06525
AFIX  33
H45A  2    1.276940    0.397214    0.906112    11.00000   -1.50000
H45B  2    1.307026    0.397386    0.864698    11.00000   -1.50000
H45C  2    1.241593    0.428647    0.867446    11.00000   -1.50000
AFIX   0
C46   1    1.214195    0.344907    0.815868    11.00000    0.08684    0.07794 =
         0.12829   -0.00212    0.04246   -0.01997
AFIX  33
H46A  2    1.186362    0.375649    0.807304    11.00000   -1.50000
H46B  2    1.254260    0.348567    0.804527    11.00000   -1.50000
H46C  2    1.192942    0.311237    0.806171    11.00000   -1.50000
AFIX  66
C47   1    0.726977    0.106680    0.779693    11.00000    0.04360    0.07368 =
         0.06613    0.01995    0.00767   -0.01713
C48   1    0.737305    0.151706    0.806137    11.00000    0.04681    0.05830 =
         0.06047    0.01399    0.01477   -0.01058
C49   1    0.695687    0.161284    0.835230    11.00000    0.06614    0.08863 =
         0.08314    0.00795    0.02830   -0.01060
AFIX  43
H49   2    0.702597    0.191409    0.852922    11.00000   -1.20000
AFIX  65
C50   1    0.643740    0.125837    0.837880    11.00000    0.06785    0.16433 =
         0.11631    0.03025    0.04601   -0.03569
C51   1    0.633411    0.080811    0.811437    11.00000    0.07241    0.12879 =
         0.10105    0.02618    0.00960   -0.05091
AFIX  43
H51   2    0.598655    0.057095    0.813210    11.00000   -1.20000
AFIX  65
C52   1    0.675029    0.071232    0.782343    11.00000    0.06573    0.07134 =
         0.07505    0.02400    0.00175   -0.03076
AFIX   0
C53   1    0.661278    0.020837    0.753870    11.00000    0.09351    0.09949 =
         0.08806    0.01750   -0.00256   -0.06083
C54   1    0.641577    0.041228    0.709001    11.00000    0.13374    0.15641 =
         0.09633    0.03398   -0.03063   -0.07032
AFIX  33
H54A  2    0.632878    0.010051    0.690958    11.00000   -1.50000
H54B  2    0.603199    0.063679    0.707618    11.00000   -1.50000
H54C  2    0.676435    0.062599    0.700599    11.00000   -1.50000
AFIX   0
C55   1    0.721570   -0.017120    0.755496    11.00000    0.13003    0.07616 =
         0.12577   -0.00047    0.00883   -0.04559
AFIX  33
H55A  2    0.711266   -0.048047    0.737413    11.00000   -1.50000
H55B  2    0.757029    0.003216    0.746845    11.00000   -1.50000
H55C  2    0.733822   -0.030081    0.783237    11.00000   -1.50000
AFIX   0
C56   1    0.605566   -0.016167    0.764465    11.00000    0.12708    0.13265 =
         0.14999    0.01964    0.00999   -0.09894
AFIX  33
H56A  2    0.599761   -0.046622    0.745529    11.00000   -1.50000
H56B  2    0.616141   -0.029878    0.792136    11.00000   -1.50000
H56C  2    0.566060    0.004925    0.762337    11.00000   -1.50000
AFIX   0
PART 1
C57   1    0.597537    0.139678    0.871903    21.00000    0.09585    0.19054 =
         0.13868    0.00667    0.07017   -0.04280
C58   1    0.603907    0.090818    0.901297    21.00000    0.32644    0.25743 =
         0.20616    0.07563    0.17796   -0.00411
AFIX 137
H58A  2    0.596587    0.057222    0.885784    21.00000   -1.50000
H58B  2    0.572306    0.094015    0.920014    21.00000   -1.50000
H58C  2    0.646855    0.090338    0.916671    21.00000   -1.50000
AFIX   0
C59   1    0.527707    0.142953    0.849529    21.00000    0.09363    0.31095 =
         0.24146   -0.03172    0.06360   -0.01730
AFIX 137
H59A  2    0.525899    0.168583    0.827006    21.00000   -1.50000
H59B  2    0.499252    0.155183    0.868478    21.00000   -1.50000
H59C  2    0.514182    0.107148    0.839075    21.00000   -1.50000
AFIX   0
C60   1    0.614749    0.192899    0.896180    21.00000    0.19286    0.25794 =
         0.23377   -0.08939    0.16259   -0.09549
AFIX 137
H60A  2    0.654563    0.187724    0.914592    21.00000   -1.50000
H60B  2    0.580363    0.201993    0.911857    21.00000   -1.50000
H60C  2    0.620118    0.222368    0.877320    21.00000   -1.50000
AFIX   0
PART 0
C61   1    0.788479    0.190670    0.807124    11.00000    0.04678    0.04548 =
         0.06138    0.00020    0.01382   -0.00501
AFIX  43
H61   2    0.790549    0.217079    0.827907    11.00000   -1.20000
AFIX  66
C62   1    0.878848    0.239280    0.786666    11.00000    0.03639    0.02860 =
         0.04848    0.00740    0.01310   -0.00327
C63   1    0.929046    0.236621    0.762649    11.00000    0.03686    0.02000 =
         0.03725    0.00000    0.00565    0.00273
C64   1    0.975552    0.278244    0.765234    11.00000    0.03261    0.02213 =
         0.04197    0.00375    0.00725    0.00297
C65   1    0.971861    0.322524    0.791836    11.00000    0.04067    0.02427 =
         0.04408   -0.00233    0.00796    0.00110
C66   1    0.921664    0.325183    0.815853    11.00000    0.05013    0.03732 =
         0.04821   -0.00802    0.01514   -0.00014
C67   1    0.875157    0.283562    0.813269    11.00000    0.04818    0.04199 =
         0.05950   -0.00919    0.02669   -0.00004
AFIX  43
H67   2    0.841572    0.285341    0.829338    11.00000   -1.20000
AFIX   0
C68   1    0.914128    0.373846    0.844471    11.00000    0.07964    0.05043 =
         0.07807   -0.02562    0.03409   -0.00703
AFIX 137
H68A  2    0.948570    0.373042    0.867355    11.00000   -1.50000
H68B  2    0.872896    0.371345    0.854537    11.00000   -1.50000
H68C  2    0.916180    0.407750    0.829516    11.00000   -1.50000
AFIX   0
C69   1    1.025111    0.366207    0.798265    11.00000    0.05036    0.03313 =
         0.05539   -0.00332    0.00740   -0.00258
AFIX 137
H69A  2    1.060838    0.355149    0.784352    11.00000   -1.50000
H69B  2    1.039960    0.370210    0.827261    11.00000   -1.50000
H69C  2    1.008096    0.400794    0.787235    11.00000   -1.50000
AFIX   0

C70   1    0.727076    0.085990    0.623154    11.00000    0.06026    0.19164 =
         0.11176    0.01040   -0.00133    0.00866
AFIX  43
H70   2    0.765172    0.065325    0.625176    11.00000   -1.20000
AFIX   0
C71   1    0.664502    0.000147    0.595389    11.00000    0.20502    0.14966 =
         0.15992   -0.05053    0.03044   -0.07070
AFIX 137
H71A  2    0.647126   -0.003186    0.566707    11.00000   -1.50000
H71B  2    0.637056   -0.019405    0.611806    11.00000   -1.50000
H71C  2    0.707568   -0.015219    0.599935    11.00000   -1.50000
AFIX   0
C72   1    0.607598    0.090024    0.603850    11.00000    0.07834    0.39087 =
         0.15030    0.00617   -0.01144    0.06472
AFIX  33
H72A  2    0.571910    0.066744    0.592836    11.00000   -1.50000
H72B  2    0.600859    0.103074    0.630656    11.00000   -1.50000
H72C  2    0.610187    0.120909    0.585759    11.00000   -1.50000
AFIX   0

C73   1    0.690263    0.291644    0.767965    11.00000    0.17877    0.12588 =
         0.15505    0.04041    0.04202    0.05498
AFIX  43
H73   2    0.731451    0.300785    0.761918    11.00000   -1.20000
AFIX   0
C74   1    0.673390    0.219368    0.712142    11.00000    0.20994    0.13349 =
         0.13939    0.02839    0.00723    0.02477
AFIX 137
H74A  2    0.714707    0.234256    0.707620    11.00000   -1.50000
H74B  2    0.643418    0.221534    0.687020    11.00000   -1.50000
H74C  2    0.678745    0.181507    0.720580    11.00000   -1.50000
AFIX   0
C75   1    0.586183    0.238557    0.756106    11.00000    0.15532    0.22146 =
         0.26350    0.10830    0.05092    0.00382
AFIX 137
H75A  2    0.583973    0.199857    0.762036    11.00000   -1.50000
H75B  2    0.552626    0.247913    0.733914    11.00000   -1.50000
H75C  2    0.580168    0.259430    0.780246    11.00000   -1.50000
AFIX   0

C76   1    0.522691    0.254614    0.993755    11.00000    0.23553    0.41707 =
         0.25347   -0.05131   -0.03955   -0.01154
AFIX  43
H76   2    0.501668    0.221404    0.986526    11.00000   -1.20000
AFIX   0
C77   1    0.448620    0.291476    0.932863    11.00000    0.23553    0.41707 =
         0.25347   -0.05131   -0.03955   -0.01154
AFIX 137
H77A  2    0.438621    0.252835    0.930400    11.00000   -1.50000
H77B  2    0.462287    0.304438    0.907682    11.00000   -1.50000
H77C  2    0.410596    0.311451    0.938016    11.00000   -1.50000
AFIX   0
C78   1    0.537087    0.349287    0.972966    11.00000    0.23553    0.41707 =
         0.25347   -0.05131   -0.03955   -0.01154
AFIX 137
H78A  2    0.568406    0.344933    0.997288    11.00000   -1.50000
H78B  2    0.508922    0.379777    0.976680    11.00000   -1.50000
H78C  2    0.559320    0.356251    0.949620    11.00000   -1.50000
AFIX   0

O9    4    0.666449    0.311981    0.795888    11.00000    0.32581    0.15204 =
         0.18543    0.01325    0.06418    0.09176
O10   4    0.560337    0.250912    1.021811    11.00000    0.18839    0.24181 =
         0.17771   -0.03526    0.01409    0.02831
N7    3    0.266218    0.233061    0.987030    10.50000    0.24936    0.12264 =
         0.14719    0.01125   -0.03130   -0.04635
C79   1    0.294930    0.198702    0.955915    10.50000    0.31240    0.14785 =
         0.19249    0.03870   -0.03635   -0.05127
C80   1    0.302966    0.257175    1.023127    11.00000    0.27838    0.21759 =
         0.22706    0.05970   -0.08286   -0.04883
O11   4    0.355850    0.194547    0.966177    10.50000    0.33587    0.29326 =
         0.29529    0.01111   -0.07034    0.04605
PART 1
C42   1    1.014298    0.412544    0.973903    41.00000    0.14960    0.16216 =
         0.18718   -0.12036    0.06807   -0.05118
AFIX  33
H42A  2    0.981549    0.414913    0.950133    41.00000   -1.50000
H42B  2    1.012645    0.376760    0.986316    41.00000   -1.50000
H42C  2    1.006539    0.440394    0.993525    41.00000   -1.50000
AFIX   0
C41   1    1.134696    0.418082    0.996993    41.00000    0.14721    0.07772 =
         0.12332   -0.05819   -0.01408    0.00595
AFIX 137
H41A  2    1.173248    0.403372    0.987875    41.00000   -1.50000
H41B  2    1.121415    0.394471    1.017875    41.00000   -1.50000
H41C  2    1.143635    0.454339    1.008200    41.00000   -1.50000
AFIX   0
C40   1    1.083204    0.475265    0.937475    41.00000    0.23435    0.07839 =
         0.15275   -0.01821    0.07819    0.01718
AFIX 137
H40A  2    1.118910    0.497220    0.950335    41.00000   -1.50000
H40B  2    1.043176    0.495008    0.937910    41.00000   -1.50000
H40C  2    1.089001    0.467672    0.909397    41.00000   -1.50000
AFIX   0
PART 0
PART 2
C59A  1    0.541941    0.090466    0.863407   -21.00000    0.07961    0.18393 =
         0.12411    0.03448    0.04564   -0.03312
AFIX  33
H59D  2    0.563744    0.056107    0.870437   -21.00000   -1.50000
H59E  2    0.511200    0.097492    0.882192   -21.00000   -1.50000
H59F  2    0.519460    0.088494    0.835719   -21.00000   -1.50000
AFIX   0
C60A  1    0.559468    0.191813    0.855552   -21.00000    0.19239    0.22003 =
         0.14308    0.04891    0.09400    0.03994
AFIX  33
H60D  2    0.592131    0.220135    0.857725   -21.00000   -1.50000
H60E  2    0.537131    0.190671    0.827799   -21.00000   -1.50000
H60F  2    0.528870    0.199668    0.874272   -21.00000   -1.50000
AFIX   0
C58A  1    0.630846    0.137896    0.909079   -21.00000    0.08201    0.25853 =
         0.12344    0.03791    0.04899   -0.05291
AFIX  33
H58D  2    0.662026    0.167356    0.910511   -21.00000   -1.50000
H58E  2    0.602247    0.143745    0.929373   -21.00000   -1.50000
H58F  2    0.653216    0.103401    0.914381   -21.00000   -1.50000
AFIX   0
C14A  1    0.731682   -0.190860    0.587035   -31.00000    0.10379    0.06026 =
         0.07386   -0.02988    0.02029   -0.04093
AFIX 137
H14D  2    0.765097   -0.209488    0.605183   -31.00000   -1.50000
H14E  2    0.703036   -0.217602    0.572444   -31.00000   -1.50000
H14F  2    0.707339   -0.167367    0.602919   -31.00000   -1.50000
AFIX   0
C12A  1    0.710491   -0.138907    0.520649   -31.00000    0.21135    0.08737 =
         0.13248   -0.02913   -0.09096   -0.03888
AFIX 137
H12D  2    0.670932   -0.130628    0.531545   -31.00000   -1.50000
H12E  2    0.702899   -0.168630    0.501159   -31.00000   -1.50000
H12F  2    0.724607   -0.106845    0.507101   -31.00000   -1.50000
AFIX   0
C13A  1    0.814819   -0.189423    0.538292   -31.00000    0.14582    0.11324 =
         0.18005   -0.10389    0.02785   -0.04600
AFIX 137
H13D  2    0.830105   -0.169188    0.516294   -31.00000   -1.50000
H13E  2    0.796439   -0.223846    0.527840   -31.00000   -1.50000
H13F  2    0.850548   -0.196430    0.559653   -31.00000   -1.50000
AFIX   0
C11A  1    0.763053   -0.155802    0.555882   -31.00000    0.12264    0.06562 =
         0.04992   -0.02609    0.00059   -0.03694
C41A  1    1.129751    0.454843    0.976056   -41.00000    0.14721    0.07772 =
         0.12332   -0.05819   -0.01408    0.00595
AFIX 137
H41D  2    1.161194    0.429160    0.989305   -41.00000   -1.50000
H41E  2    1.116442    0.479430    0.996335   -41.00000   -1.50000
H41F  2    1.148814    0.475737    0.955853   -41.00000   -1.50000
AFIX   0
C40A  1    1.027514    0.462545    0.926860   -41.00000    0.22580    0.10529 =
         0.21279   -0.10231   -0.09489    0.10466
AFIX 137
H40D  2    1.049669    0.473925    0.904374   -41.00000   -1.50000
H40E  2    1.017427    0.494375    0.942263   -41.00000   -1.50000
H40F  2    0.987958    0.443799    0.916180   -41.00000   -1.50000
AFIX   0
C42A  1    1.033623    0.401064    0.988266   -41.00000    0.14960    0.16216 =
         0.18718   -0.12036    0.06807   -0.05118
AFIX 137
H42D  2    0.995555    0.381957    0.975432   -41.00000   -1.50000
H42E  2    1.020822    0.430993    1.004614   -41.00000   -1.50000
H42F  2    1.060812    0.375990    1.005670   -41.00000   -1.50000
AFIX   0
C57A  1    0.591410    0.136608    0.866359   -21.00000    0.07528    0.17960 =
         0.12272    0.02840    0.05141   -0.02902
C39A  1    1.071189    0.423674    0.955081   -41.00000    0.12571    0.05063 =
         0.10762   -0.05094    0.00061   -0.01165
HKLF 4

REM  JD034_0m in C2/c
REM R1 =  0.0558 for    8217 Fo > 4sig(Fo)  and  0.0652 for all    9551 data
REM    947 parameters refined using    349 restraints

END

WGHT      0.0883     66.3385

REM Highest difference peak  1.154,  deepest hole -0.511,  1-sigma level  0.079
Q1    1   0.6724  0.1190  0.6204  11.00000  0.05    0.51
Q2    1   1.0830  0.3879  0.9324  11.00000  0.05    0.47
Q3    1   0.6350  0.1367  0.8450  11.00000  0.05    0.45
Q4    1   0.8133  0.1307  0.6602  11.00000  0.05    0.44
Q5    1   0.7219  0.0257  0.6239  11.00000  0.05    0.43
Q6    1   0.8638 -0.0062  0.5561  11.00000  0.05    0.41
Q7    1   1.0844  0.4027  0.9991  11.00000  0.05    0.40
Q8    1   0.8759  0.1584  0.6820  11.00000  0.05    0.39
Q9    1   0.7785 -0.1113  0.5740  11.00000  0.05    0.39
Q10   1   0.5415  0.2525  0.9899  11.00000  0.05    0.38
Q11   1   0.9399  0.0242  0.7696  11.00000  0.05    0.37
Q12   1   0.7378  0.1034  0.7668  11.00000  0.05    0.36
Q13   1   0.4562  0.2995  1.0059  11.00000  0.05    0.35
Q14   1   0.2882  0.2143  1.0166  11.00000  0.05    0.35
Q15   1   0.8405  0.1365  0.7032  11.00000  0.05    0.34
Q16   1   1.0588  0.2023  0.8505  11.00000  0.05    0.34
Q17   1   0.9228  0.0409  0.8206  11.00000  0.05    0.33
Q18   1   1.1850  0.3438  0.8892  11.00000  0.05    0.33
Q19   1   0.9851  0.3197  0.8031  11.00000  0.05    0.33
Q20   1   0.9595 -0.0709  0.8013  11.00000  0.05    0.32
Q21   1   0.5154  0.3503  0.9394  11.00000  0.05    0.32
Q22   1   1.1385  0.3691  0.9097  11.00000  0.05    0.32
Q23   1   0.6938 -0.1511  0.5790  11.00000  0.05    0.32
Q24   1   0.8627  0.0141  0.6122  11.00000  0.05    0.31
Q25   1   0.6442  0.0939  0.8123  11.00000  0.05    0.31
Q26   1   0.2751  0.2405  0.9802  11.00000  0.05    0.31
Q27   1   1.0000  0.2747  0.7500  10.50000  0.05    0.31
Q28   1   0.7114  0.0756  0.6158  11.00000  0.05    0.31
Q29   1   1.1232  0.2841  0.8626  11.00000  0.05    0.30
Q30   1   0.8591  0.0689  0.8571  11.00000  0.05    0.30
Q31   1   0.8050 -0.0455  0.5602  11.00000  0.05    0.30
Q32   1   0.8250  0.1744  0.7593  11.00000  0.05    0.30
Q33   1   0.8730  0.2962  0.8037  11.00000  0.05    0.29
Q34   1   0.4556  0.2555  0.9582  11.00000  0.05    0.29
Q35   1   0.6129  0.3061  0.8189  11.00000  0.05    0.29
Q36   1   0.4412  0.3277  0.9528  11.00000  0.05    0.29
Q37   1   0.6087  0.3136  0.8099  11.00000  0.05    0.28
Q38   1   0.8199 -0.0644  0.5608  11.00000  0.05    0.28
Q39   1   0.5097  0.2934  0.9219  11.00000  0.05    0.28
Q40   1   0.4597  0.2417  0.9460  11.00000  0.05    0.28
Q41   1   0.5994  0.2698  0.7912  11.00000  0.05    0.27
Q42   1   0.9209  0.0519  0.7605  11.00000  0.05    0.27
Q43   1   0.8200 -0.1060  0.6079  11.00000  0.05    0.27
Q44   1   0.6134  0.0357  0.6027  11.00000  0.05    0.27
Q45   1   0.6425  0.2638  0.7602  11.00000  0.05    0.27
Q46   1   0.6789  0.2799  0.7658  11.00000  0.05    0.27
Q47   1   0.8023 -0.2112  0.5704  11.00000  0.05    0.26
Q48   1   0.6219  0.0867  0.6081  11.00000  0.05    0.26
Q49   1   0.8173  0.1565  0.6811  11.00000  0.05    0.26
Q50   1   0.2737  0.2869  1.0481  11.00000  0.05    0.26
Q51   1   0.9309  0.0518  0.8322  11.00000  0.05    0.26
Q52   1   0.7420 -0.1353  0.4990  11.00000  0.05    0.26
Q53   1   0.9119  0.1243  0.6593  11.00000  0.05    0.26
Q54   1   0.8723  0.1001  0.6885  11.00000  0.05    0.26
Q55   1   0.3138  0.2625  1.0083  11.00000  0.05    0.25
Q56   1   0.3427  0.2645  0.9934  11.00000  0.05    0.24
Q57   1   0.9076  0.0673  0.7174  11.00000  0.05    0.24
Q58   1   0.8994  0.1694  0.7405  11.00000  0.05    0.24
Q59   1   0.9751  0.1739  0.8687  11.00000  0.05    0.24
Q60   1   0.9074 -0.0351  0.6884  11.00000  0.05    0.23
Q61   1   0.5441  0.2459  1.0248  11.00000  0.05    0.23
Q62   1   0.8972  0.1332  0.8990  11.00000  0.05    0.23
Q63   1   1.0609  0.3480  0.9206  11.00000  0.05    0.23
Q64   1   0.9224  0.0499  0.6494  11.00000  0.05    0.23
Q65   1   0.5970  0.1230  0.9058  11.00000  0.05    0.22
Q66   1   0.6631  0.0615  0.7878  11.00000  0.05    0.22
Q67   1   0.8222  0.0946  0.7607  11.00000  0.05    0.22
Q68   1   0.9398  0.1504  0.8884  11.00000  0.05    0.22
Q69   1   1.0196  0.4536  0.9410  11.00000  0.05    0.22
Q70   1   0.5606  0.1074  0.8728  11.00000  0.05    0.22
Q71   1   1.2802  0.3751  0.9125  11.00000  0.05    0.22
Q72   1   0.5856  0.2119  0.7100  11.00000  0.05    0.22
Q73   1   0.8956 -0.0404  0.7516  11.00000  0.05    0.21
Q74   1   0.9471  0.1619  0.6587  11.00000  0.05    0.21
Q75   1   0.6950  0.3157  0.8016  11.00000  0.05    0.21
Q76   1   0.5981  0.2073  0.7172  11.00000  0.05    0.21
Q77   1   0.9410  0.0348  0.6678  11.00000  0.05    0.21
Q78   1   0.7236 -0.1592  0.5549  11.00000  0.05    0.21
Q79   1   1.1401  0.4420  0.9919  11.00000  0.05    0.21
Q80   1   1.0002  0.4544  0.9925  11.00000  0.05    0.21
Q81   1   0.8954  0.0121  0.6408  11.00000  0.05    0.21
Q82   1   0.5789  0.0249  0.6291  11.00000  0.05    0.21
Q83   1   0.9090  0.1954  0.7091  11.00000  0.05    0.21
Q84   1   0.8408  0.1370  0.7801  11.00000  0.05    0.21
Q85   1   0.6756  0.0440  0.7711  11.00000  0.05    0.21
Q86   1   0.8933 -0.0250  0.7367  11.00000  0.05    0.20
Q87   1   0.3604  0.3012  1.0072  11.00000  0.05    0.20
Q88   1   0.8795  0.0683  0.6010  11.00000  0.05    0.20
Q89   1   0.9610  0.0953  0.7581  11.00000  0.05    0.20
Q90   1   0.8766  0.2239  0.7935  11.00000  0.05    0.20
Q91   1   0.3287  0.3043  1.0078  11.00000  0.05    0.19
Q92   1   1.1516  0.3797  1.0177  11.00000  0.05    0.19
Q93   1   0.7869  0.0396  0.8770  11.00000  0.05    0.19
Q94   1   0.5654  0.0104  0.7508  11.00000  0.05    0.19
Q95   1   0.6777 -0.2064  0.5741  11.00000  0.05    0.19
Q96   1   0.9221  0.3494  0.8303  11.00000  0.05    0.19
Q97   1   0.5828  0.0945  0.5701  11.00000  0.05    0.19
Q98   1   0.8280  0.1598  0.6187  11.00000  0.05    0.19
Q99   1   0.9003 -0.0189  0.4909  11.00000  0.05    0.19
Q100  1   0.8650  0.0547  0.6393  11.00000  0.05    0.19
;
_shelx_res_checksum               53863
_shelx_hkl_file
;
   2   0   0  775.77   22.69
  -2   0   0  767.77   22.58
  -4   0   0 5213.22  113.33
   4   0   0 5301.95  140.92
  -4   0   0 4906.35  139.73
  -6   0   0  135.54    4.30
  -8   0   0    1.50    0.78
 -10   0   0    6.50    1.23
  12   0   0 2264.57   48.62
 -12   0   0 2041.54   34.21
 -12   0   0 2042.37   48.65
  14   0   0  283.93   10.42
 -14   0   0  269.02    6.14
 -14   0   0  280.41    9.02
  16   0   0  451.65   15.29
 -18   0   0   51.78    2.40
 -20   0   0   26.62    1.72
 -22   0   0    1.25    0.71
   1   1   0 5323.33  164.20
  -3  -1   0   36.03    1.43
   3   1   0   35.84    1.37
  -3   1   0   36.65    1.34
  -5  -1   0  611.76   16.91
  -7   1   0   71.57    2.77
  -7  -1   0   68.06    2.90
  -9  -1   0   79.24    3.45
  -9   1   0   80.41    3.34
 -11   1   0  537.12    9.94
 -11   1   0  529.20   14.18
 -11  -1   0  545.37   14.39
  11   1   0  584.55   15.44
 -11  -1   0  533.85    9.89
 -13   1   0  305.81    6.43
  13   1   0  301.64   10.58
 -13  -1   0  288.29    6.32
 -13  -1   0  284.27    9.22
  13  -1   0  322.49   10.59
 -13   1   0  294.55    9.19
  15   1   0    1.16    2.07
  15  -1   0    3.99    2.17
 -15   1   0    1.76    0.79
  17  -1   0   75.07    6.12
 -19   1   0   16.35    1.47
 -19  -1   0   16.50    1.50
 -21   1   0   20.12    1.49
 -21  -1   0   20.63    1.51
   0  -2   0   55.00    1.93
   0   2   0   56.45    1.93
   2   2   0   97.60    3.17
   2  -2   0   94.76    2.95
  -4  -2   0 3425.82   89.74
   4   2   0 3506.64   91.60
  -4   2   0 3178.17   73.94
  -6   2   0   53.52    2.21
  -8   2   0   13.19    1.30
  -8  -2   0    7.63    1.32
 -10   2   0    3.49    0.98
 -10   2   0    3.19    0.64
 -10  -2   0    4.02    1.20
  12   2   0    1.78    1.76
 -12  -2   0    2.75    1.20
 -14  -2   0   64.13    2.44
  14  -2   0   72.24    4.74
 -14   2   0   68.24    2.58
  14   2   0   64.64    5.12
 -14  -2   0   67.49    3.89
 -14   2   0   61.15    3.55
  16  -2   0    4.13    2.43
  18  -2   0   30.89    4.50
 -18   2   0   30.23    1.90
 -18  -2   0   26.55    1.89
 -20   2   0   53.48    2.21
 -20  -2   0   53.99    2.25
 -22  -2   0   13.09    1.13
 -22   2   0   11.61    1.09
   1   3   0    9.39    0.73
  -1  -3   0    7.94    0.74
   3   3   0  137.71    4.32
  -3   3   0  123.64    3.52
   3  -3   0  132.90    3.95
  -5   3   0 1408.48   31.65
  -7   3   0  432.82   10.83
  -9   3   0  162.41    5.21
 -11   3   0  277.87    5.73
 -11  -3   0  267.64    5.61
 -11   3   0  268.59    8.13
 -11  -3   0  279.75    8.61
  11   3   0  276.90    9.62
 -13   3   0  402.41    8.02
 -13   3   0  393.74   11.39
 -13  -3   0  406.76    7.93
 -13  -3   0  387.62   11.68
  13   3   0  399.71   13.23
  15  -3   0    1.17    1.72
 -15   3   0    4.60    0.98
 -17   3   0   18.32    1.81
  17  -3   0   20.29    3.67
 -19   3   0   38.01    1.97
 -19   3   0   36.70    2.26
 -19  -3   0   36.74    2.01
 -21  -3   0    7.61    1.03
 -21   3   0    3.99    0.87
   0  -4   0 1269.17   33.21
   0   4   0 1179.01   27.22
   2   4   0  490.85   13.49
  -2   4   0  438.77   10.91
   2  -4   0  488.18   13.26
  -4   4   0 2045.68   45.85
   4  -4   0 2088.81   55.32
  -6   4   0  564.24   13.57
  -8   4   0  121.22    4.12
 -10   4   0   24.39    1.97
 -10   4   0   24.86    1.33
  10   4   0   22.68    2.86
  12   4   0  292.18   10.77
 -12   4   0  313.53    9.25
 -12   4   0  308.71    6.44
 -12  -4   0  315.54    6.36
 -12  -4   0  311.48    9.68
 -14   4   0    9.15    1.71
 -14  -4   0   12.00    2.10
 -14   4   0   12.06    1.29
  16  -4   0  101.37    6.21
 -18  -4   0   17.23    1.51
 -18   4   0   16.50    1.42
  18  -4   0   21.43    3.83
 -18   4   0   19.52    1.87
 -20   4   0   36.42    2.17
 -20   4   0   34.36    1.84
 -20  -4   0   34.99    1.86
 -22   4   0   -0.03    0.58
 -22  -4   0   -0.21    0.58
  -1   5   0  317.74    7.80
   1   5   0  329.00    8.02
  -3   5   0   11.71    0.99
  -5   5   0  529.59   12.71
  -7   5   0  537.93   13.23
  -9   5   0   36.32    2.24
 -11  -5   0   47.15    3.20
  11   5   0   45.76    4.12
 -11   5   0   45.86    2.67
 -11   5   0   45.00    1.83
 -13   5   0   40.94    2.78
 -13  -5   0   42.53    3.26
 -13   5   0   43.10    2.00
 -15   5   0    2.13    1.10
 -15   5   0    0.69    0.71
  17  -5   0   32.16    4.15
 -17   5   0   34.36    2.27
 -17   5   0   32.91    1.85
 -17  -5   0   34.73    1.95
 -19  -5   0   28.08    1.82
 -19   5   0   31.27    2.15
 -19   5   0   32.43    1.83
 -21  -5   0    1.10    0.73
 -21   5   0    1.39    0.76
 -21   5   0    2.40    0.92
   0   6   0   19.92    1.37
  -2   6   0   94.78    2.98
  -4   6   0  160.92    4.60
  -6   6   0  133.22    4.26
  -8   6   0  205.44    6.16
 -10   6   0  103.83    4.09
  10   6   0   86.17    5.32
 -10   6   0  111.60    2.93
 -12  -6   0   52.05    3.63
 -12   6   0   53.25    2.09
 -12   6   0   49.74    2.94
 -14   6   0   12.25    1.30
 -14   6   0   12.17    1.67
 -16   6   0   45.09    2.51
 -18   6   0    1.13    0.95
  18  -6   0    3.86    2.45
 -18  -6   0    0.59    0.78
 -20   6   0    2.65    1.00
 -20  -6   0    1.65    0.78
   1   7   0  204.65    5.64
  -1   7   0  199.06    5.47
  -5   7   0  429.16   10.75
  -7   7   0 4387.15   96.95
   9   7   0  461.34   13.99
  -9   7   0  499.55   12.67
 -11   7   0  329.29    9.65
 -11   7   0  332.17    6.70
 -13  -7   0    5.98    1.90
 -13   7   0   -0.27    0.61
 -13   7   0   -0.42    0.92
 -15   7   0   49.59    3.01
 -15   7   0   52.27    2.38
 -17  -7   0   39.76    2.02
 -17   7   0   43.43    2.53
  17  -7   0   43.81    4.53
 -19  -7   0   85.07    2.74
 -19   7   0   94.81    3.59
 -21  -7   0    9.68    1.01
 -21   7   0   10.01    1.27
   0   8   0    5.12    1.15
  -2   8   0  144.07    4.43
  -4   8   0  293.75    7.84
  -6   8   0 4034.80   89.30
  -8   8   0 1138.90   26.80
 -10   8   0  834.59   14.27
 -10   8   0  813.20   20.34
 -12   8   0   62.85    2.34
 -12   8   0   64.72    3.51
 -14   8   0   45.29    2.88
 -14   8   0   40.23    2.09
 -16   8   0   13.22    1.93
 -16   8   0   12.96    1.59
  18  -8   0   96.12    6.37
 -18   8   0  100.30    3.86
 -20   8   0   39.11    2.31
 -20  -8   0   31.41    1.67
  -1   9   0   97.52    3.45
   1   9   0   97.02    3.54
  -3   9   0   58.59    2.65
  -5   9   0 2174.06   48.99
  -7   9   0  460.89   12.04
  -9   9   0   10.47    1.49
 -11   9   0   81.03    3.89
 -13   9   0   22.54    2.18
 -13   9   0   20.75    1.54
 -15   9   0   25.22    2.04
 -15   9   0   24.68    2.35
 -17   9   0   58.51    2.93
  17   9   0   55.97    4.94
 -17   9   0   56.60    3.38
 -19   9   0    4.52    1.26
 -21   9   0    1.30    0.80
   0  10   0    8.73    1.16
  -2  10   0   12.99    1.37
  -4  10   0  125.86    4.41
  -6  10   0  225.82    6.88
  -8  10   0   44.64    2.66
 -10  10   0  133.42    5.18
 -14  10   0    5.70    1.22
  14  10   0    8.44    2.50
 -14  10   0    6.40    1.45
 -16  10   0    4.60    1.42
  16  10   0    5.85    2.53
 -16  10   0    6.24    1.29
  18  10   0   12.22    2.80
 -18  10   0    9.58    1.52
 -20  10   0   47.71    2.48
  -1  11   0   48.56    2.59
   1  11   0   52.49    2.66
   5  11   0  209.48    6.97
  -5  11   0  217.56    6.74
  -7  11   0  814.12   20.14
  -9  11   0  115.74    4.79
  13  11   0   20.39    3.05
 -13  11   0   17.55    2.12
 -15  11   0    0.58    0.96
 -15  11   0    0.32    1.13
  15  11   0   -0.49    1.77
  17  11   0   15.44    2.89
 -17  11   0   16.48    1.81
 -17  11   0   16.58    2.22
 -19  11   0  147.41    4.67
   0  12   0  909.00   21.23
   0  12   0  924.42   22.20
  -2  12   0  126.38    4.68
   2  12   0  129.62    4.69
  -2  12   0  130.54    4.58
  -4  12   0    7.93    1.49
  -4  12   0    9.51    1.44
   4  12   0    9.56    1.68
  -6  12   0  638.83   16.44
  -8  12   0  122.20    4.96
 -10  12   0    0.97    1.05
  12  12   0   70.64    4.65
 -12  12   0   70.71    3.72
 -14  12   0   44.11    2.58
  14  12   0   38.40    3.91
 -14  12   0   43.45    3.09
 -16  12   0    5.70    1.55
 -16  12   0    5.03    1.29
  16  12   0    5.71    2.19
 -18  12   0    6.84    1.36
 -20  12   0   14.45    1.59
  -1  13   0  433.94   11.70
  -1  13   0  425.92   11.13
   1  13   0  409.62   11.07
  -3  13   0    1.21    0.83
  -3  13   0    5.21    1.29
   5  13   0  290.21    8.84
  -5  13   0  292.15    8.86
  -7  13   0   16.97    2.01
  -9  13   0    0.09    1.05
 -11  13   0   28.03    2.43
  11  13   0   27.87    3.11
  13  13   0   59.07    4.49
 -13  13   0   61.67    3.61
 -13  13   0   57.70    2.90
 -15  13   0    4.40    1.21
 -15  13   0    4.24    1.48
  15  13   0    1.23    1.78
 -17  13   0    1.29    1.23
 -17  13   0    0.93    1.00
 -19  13   0    8.34    1.35
   0  14   0  241.62    8.00
   0  14   0  270.35    7.84
   2  14   0   30.53    2.47
  -2  14   0   32.54    2.31
  -2  14   0   34.04    2.48
   4  14   0  247.73    7.66
  -4  14   0  221.16    7.57
  -6  14   0   14.97    1.99
  -8  14   0    3.05    1.36
  10  14   0    3.51    1.60
 -10  14   0    2.85    1.16
  12  14   0  107.05    5.55
 -12  14   0  102.70    3.94
 -12  14   0  109.33    4.85
  14  14   0    0.46    1.65
 -14  14   0    1.29    0.98
 -14  14   0    2.15    1.32
  16  14   0   32.60    3.54
 -16  14   0   33.15    2.82
 -16  14   0   32.01    2.34
 -18  14   0   19.15    1.91
  -1  15   0 1219.87   28.15
  -1  15   0 1208.92   29.55
   1  15   0 1219.51   28.18
   3  15   0  117.65    4.84
  -3  15   0  108.48    4.59
  -3  15   0  111.15    4.91
  -5  15   0   55.46    3.40
  -9  15   0    0.68    0.97
   9  15   0    1.08    1.27
  -9  15   0   -0.90    2.37
 -11  15   0  197.86    6.93
 -11  15   0  196.05    5.68
  11  15   0  198.06    7.57
  13  15   0  310.67   10.35
 -13  15   0  323.29    9.67
 -13  15   0  317.61    7.93
 -15  15   0   22.91    2.14
 -15  15   0   22.64    2.49
  15  15   0   18.69    2.76
 -17  15   0   66.47    3.06
 -17  15   0   66.16    3.67
   0  16   0 1800.61   40.54
  -2  16   0  374.27   10.59
   2  16   0  362.68   10.57
  -2  16   0  369.76   11.23
  -4  16   0  504.56   14.36
  -6  16   0    2.41    1.04
  -6  16   0   -1.42    2.42
  -8  16   0    6.62    1.53
  -8  16   0    0.43    2.76
   8  16   0    6.69    1.76
 -10  16   0  150.27    5.84
  10  16   0  148.86    6.28
 -12  16   0  371.50   10.77
  12  16   0  364.74   11.35
 -12  16   0  372.54    8.83
  14  16   0   53.65    4.04
 -14  16   0   53.84    3.56
 -14  16   0   54.27    2.89
 -16  16   0   87.40    4.25
 -16  16   0   90.95    3.60
   1  17   0   25.66    2.55
  -1  17   0   29.14    2.71
  -3  17   0    0.04    2.87
   5  17   0   46.37    3.20
  -5  17   0   47.58    3.01
  -7  17   0   10.44    1.77
   7  17   0    9.20    1.86
  -9  17   0  221.36    7.53
   9  17   0  221.77    7.85
 -11  17   0    2.73    1.47
  11  17   0    5.14    1.74
 -13  17   0    9.10    1.51
 -13  17   0    9.19    1.91
  13  17   0    9.95    2.15
 -15  17   0    2.79    1.11
 -15  17   0    1.93    1.32
 -17  17   0    0.45    1.06
 -17  17   0   -0.09    0.82
   0  18   0  801.45   19.71
   0  18   0  756.11   18.67
   2  18   0   10.88    1.85
  -2  18   0   11.27    1.82
  -2  18   0   13.18    2.07
   4  18   0  118.97    5.13
  -4  18   0  113.59    4.88
   6  18   0    0.44    1.18
  -6  18   0   -0.82    2.92
  -6  18   0    1.40    1.10
   8  18   0   44.92    3.34
  -8  18   0   43.29    3.11
  10  18   0   54.84    3.74
 -10  18   0   51.72    3.48
 -12  18   0  176.83    6.62
  12  18   0  177.71    6.90
 -14  18   0   96.46    4.55
 -14  18   0   88.60    3.58
 -16  18   0    9.22    1.63
 -16  18   0    7.99    1.25
   3  19   0   47.66    3.30
  -3  19   0   44.74    3.07
   5  19   0   21.67    2.55
  -5  19   0   21.58    2.31
  -7  19   0    1.35    1.13
  -7  19   0   -2.02    2.80
   7  19   0    0.95    1.28
   9  19   0   60.57    3.89
  -9  19   0   54.50    3.53
 -11  19   0   40.58    3.18
  11  19   0   40.24    3.29
 -13  19   0  163.28    6.17
 -15  19   0   16.67    1.69
 -15  19   0   13.56    1.91
  -4  20   0    6.78    1.59
   4  20   0    6.79    1.65
  -4  20   0   -1.49    3.33
   6  20   0   10.08    2.02
  -6  20   0   13.34    2.08
  -8  20   0    4.18    1.47
   8  20   0    4.68    1.61
  -8  20   0    0.05    3.10
 -10  20   0   -0.53    1.23
  10  20   0    0.66    1.40
 -10  20   0   -0.13    3.42
 -12  20   0   19.29    2.43
 -14  20   0    9.00    1.66
  -3  21   0  195.28    7.08
   3  21   0  208.88    7.33
  -5  21   0    2.83    1.31
   5  21   0    2.15    1.29
  -5  21   0   -0.62    3.28
   7  21   0    0.17    1.14
  -7  21   0    0.45    1.14
  -7  21   0   -0.97    3.09
   9  21   0   55.66    3.73
  -9  21   0   52.50    3.48
  11  21   0    0.01    1.27
 -11  21   0   -0.03    1.16
 -13  21   0   30.39    2.55
  -2  22   0   47.83    3.30
   2  22   0   50.58    3.45
  -4  22   0    1.22    1.22
   4  22   0   -0.79    1.04
  -4  22   0    0.68    3.45
  -6  22   0  242.69    8.14
   6  22   0  245.12    8.19
  -8  22   0   -0.07    3.49
   8  22   0    7.73    1.81
  -8  22   0    7.33    1.74
  10  22   0   64.34    3.80
 -10  22   0   62.34    3.64
 -12  22   0   -0.26    1.01
   3  23   0   49.26    3.47
  -3  23   0   55.63    3.53
  -5  23   0  311.71    9.64
   5  23   0  330.65    9.81
  -7  23   0  347.93   10.23
   7  23   0  344.63   10.18
  -9  23   0   -3.24    2.80
   9  23   0    5.91    1.58
  -9  23   0    6.42    1.60
 -11  23   0  106.71    4.55
   0  24   0    6.77    1.64
   0  24   0    0.22    3.77
  -2  24   0    1.02    3.83
   2  24   0    8.49    1.78
  -2  24   0   10.08    1.89
  -4  24   0   20.90    2.48
   4  24   0   24.01    2.50
  -6  24   0  267.43    8.48
   6  24   0  271.93    8.50
  -8  24   0   68.17    3.72
   8  24   0   68.32    3.70
  -1  25   0   19.00    2.27
  -3  25   0  135.84    5.47
   3  25   0  136.82    5.45
  -5  25   0   10.73    1.87
   5  25   0   10.93    1.84
  -7  25   0   -0.11    3.22
  -7  25   0    2.19    1.15
   0  26   0    6.14    1.49
   0  26   0   -1.05    3.19
   2  26   0   13.13    1.88
  -2  26   0   12.58    1.91
  -4  26   0   -0.65    3.00
   4  26   0    3.64    1.30
  -4  26   0    1.86    1.16
 -22   0   1   -0.26    0.64
 -20   0   1   -0.80    0.66
  18   0  -1    2.69    2.94
 -18   0   1    1.45    0.88
  16   0  -1    1.25    2.36
 -10   0   1    0.60    0.83
  10   0  -1    0.39    1.28
  -8   0   1    0.92    0.67
   6   0  -1    0.79    0.59
  -6   0   1   -1.61    0.71
  -4   0   1    0.69    0.48
   2   0  -1    2.16    0.34
  -2   0   1    1.23    0.29
   0   0  -1  -14.99    0.04
  -4   0  -1    0.66    0.60
  -4   0  -1    0.63    0.33
  -6   0  -1    0.58    0.66
  -8   0  -1   -0.73    0.68
 -10   0  -1    0.57    0.81
 -12   0  -1    0.20    0.68
  12   0   1    2.42    1.60
 -14   0  -1    0.84    1.10
 -14   0  -1    0.97    0.61
  14   0   1    0.59    1.77
 -18   0  -1   -0.22    0.79
 -20   0  -1    0.02    0.72
 -22   0  -1   -0.87    0.60
 -21   1   1   26.30    1.62
 -21  -1   1   26.22    1.64
 -19  -1   1    2.15    0.82
 -19   1   1    2.33    0.84
  17  -1  -1  188.26    9.11
  17   1  -1  163.54    8.94
  15   1  -1   35.70    4.21
  15  -1  -1   36.10    3.80
 -13   1   1  740.99   19.42
  13   1  -1  765.95   20.87
 -13   1   1  759.07   13.67
 -13  -1   1  750.36   13.62
 -13  -1   1  757.21   19.64
  13  -1  -1  825.36   20.82
 -11  -1   1  140.89    3.64
  11   1  -1  159.30    6.78
 -11   1   1  154.56    5.45
 -11   1   1  165.85    3.84
 -11  -1   1  147.59    5.47
  -9   1   1    1.65    0.87
  -9  -1   1    2.65    1.02
  -7  -1   1    4.18    0.93
  -7   1   1    4.29    0.83
   5   1  -1  236.40    6.85
  -5   1   1  227.37    6.06
  -5  -1   1  231.86    6.99
   5  -1  -1  235.32    6.66
   3  -1  -1  856.21   23.73
   3   1  -1  860.31   23.38
  -3  -1   1  849.66   23.37
  -1  -1   1 6703.95  188.54
   1   1  -1 7212.05  190.11
   1  -1   1 4814.80  138.18
  -1   1  -1 4915.33  139.39
  -3   1  -1    1.67    0.42
  -3  -1  -1    1.62    0.36
  -5  -1  -1  666.92   18.13
  -5   1  -1  652.59   15.46
  -7   1  -1  176.19    5.34
  -7  -1  -1  185.03    5.60
  -9   1  -1    1.01    0.82
  -9  -1  -1    2.10    0.92
  11   1   1  601.12   15.63
 -11   1  -1  545.10   14.59
 -11  -1  -1  559.25   10.17
 -11   1  -1  558.44   10.20
 -11  -1  -1  545.93   14.74
  13  -1   1  434.57   12.88
 -13  -1  -1  388.53    7.96
 -13   1  -1  398.86    8.05
 -13   1  -1  381.12   11.45
  13   1   1  411.00   12.96
 -15  -1  -1  106.29    3.42
 -15   1  -1  111.20    3.52
  15  -1   1  115.00    6.46
 -19  -1  -1    2.94    0.92
 -19   1  -1    2.00    0.87
 -21  -1  -1   29.56    1.67
 -21   1  -1   29.59    1.67
 -22  -2   1   14.53    1.25
 -22   2   1   14.36    1.24
 -20   2   1    9.22    1.11
 -20  -2   1    8.02    1.08
 -18  -2   1    7.12    1.19
 -18   2   1    7.00    1.15
  18  -2  -1    7.88    3.23
 -18   2   1    5.88    1.19
  16   2  -1  111.33    7.29
  16  -2  -1  126.27    7.04
 -14  -2   1  264.43    8.67
 -14   2   1  260.62    5.88
 -14   2   1  240.32    8.23
  14   2  -1  249.08   10.12
  14  -2  -1  265.63    9.76
 -12   2   1 1424.86   23.89
 -12   2   1 1427.34   33.86
 -12  -2   1 1450.26   23.87
  12   2  -1 1456.34   34.80
 -12  -2   1 1443.30   34.20
  10   2  -1    5.46    1.67
 -10  -2   1    4.06    1.16
  -8   2   1   77.95    3.00
  -8  -2   1   70.30    3.20
  -6   2   1    4.94    0.78
   6   2  -1    4.40    0.71
  -4  -2   1  218.10    6.73
   4   2  -1  217.76    6.59
   4  -2  -1  221.17    6.26
  -4   2   1  216.74    5.56
   2   2  -1   77.26    2.65
  -2  -2   1   77.36    2.70
   0  -2   1 8091.65  222.90
   0   2  -1 8460.02  223.85
   2  -2   1  237.34    7.05
  -2   2  -1  253.49    7.07
  -4  -2  -1 3285.22   87.14
  -4   2  -1 3236.36   71.66
  -6   2  -1  313.01    8.08
  -8   2  -1  625.70   15.05
  -8  -2  -1  595.76   15.39
 -10   2  -1  110.83    2.95
 -10   2  -1  113.80    4.26
 -10  -2  -1  107.74    4.46
  12   2   1 1054.66   26.04
 -12  -2  -1 1037.62   17.51
 -12   2  -1 1021.05   17.57
 -12  -2  -1 1021.19   25.28
 -12   2  -1  987.41   24.87
 -14  -2  -1    4.64    0.89
  14  -2   1    2.97    1.93
 -14   2  -1    3.97    1.35
 -14   2  -1    4.43    0.90
 -14  -2  -1    4.47    1.57
 -16   2  -1  264.42    6.30
  16  -2   1  261.68   10.57
 -18  -2  -1   16.02    1.48
 -18   2  -1   17.97    1.51
 -20  -2  -1   61.00    2.39
 -20   2  -1   56.45    2.30
 -22  -2  -1   -0.50    0.59
 -22   2  -1    0.41    0.65
 -21   3   1   71.94    2.45
 -21  -3   1   76.09    2.52
  19  -3  -1   76.93    6.29
 -19   3   1   75.57    3.10
 -19   3   1   74.18    2.59
 -19  -3   1   78.15    2.72
  17  -3  -1  140.88    7.66
 -17   3   1  133.97    4.33
  15  -3  -1  100.25    5.76
  15   3  -1   89.27    6.32
 -13   3   1  220.95    7.34
  13   3  -1  216.21    9.08
 -13   3   1  229.49    5.19
 -13  -3   1  208.12    7.45
 -11   3   1  306.15    6.26
 -11  -3   1  314.57    6.25
 -11  -3   1  315.86    9.38
 -11   3   1  312.13    8.98
  11   3  -1  304.50   10.42
  -9   3   1  119.72    4.12
  -9  -3   1  109.56    4.45
  -5   3   1  178.44    4.91
   5  -3  -1  183.04    5.21
   5   3  -1  177.68    5.73
  -3   3   1  414.28    9.89
   3   3  -1  435.10   12.15
  -1  -3   1   49.78    2.04
   1   3  -1   51.46    2.01
   1  -3   1  106.64    3.61
  -1  -3  -1  117.32    3.76
  -1   3  -1  121.04    3.63
  -3   3  -1  462.28   10.53
   3  -3   1  436.97   12.41
  -5   3  -1  209.07    5.60
  -7   3  -1  234.39    6.51
  -9   3  -1   43.19    2.35
 -11   3  -1  488.02    9.08
 -11  -3  -1  485.29    8.97
 -11  -3  -1  483.31   13.35
 -11   3  -1  483.11   12.91
  11   3   1  490.20   14.19
 -13  -3  -1   20.99    2.36
 -13  -3  -1   23.10    1.51
 -13   3  -1   25.70    1.60
 -13   3  -1   24.23    2.22
 -15   3  -1   99.71    3.35
  15  -3   1  105.68    6.06
 -17  -3  -1    9.64    1.28
 -17   3  -1    8.52    1.35
  17  -3   1   10.49    3.07
 -17   3  -1    7.31    1.16
 -19  -3  -1   80.59    2.80
 -19   3  -1   76.33    2.71
 -21  -3  -1    8.22    1.06
 -21   3  -1    6.54    0.99
 -22   4   1   17.72    1.26
 -22  -4   1   18.87    1.32
 -20   4   1   -0.62    0.69
 -20  -4   1    1.63    0.80
 -20   4   1    1.16    0.91
  18  -4  -1   -0.70    2.20
 -18  -4   1   -1.52    0.77
 -18   4   1   -0.48    0.74
 -18   4   1    0.96    0.88
  16  -4  -1   54.84    4.74
  14   4  -1  165.27    8.52
 -14  -4   1  184.65    6.97
 -14   4   1  181.12    4.61
 -14   4   1  174.19    6.51
 -12  -4   1   51.84    3.24
 -12   4   1   51.23    2.95
  12   4  -1   53.84    4.51
 -12   4   1   57.42    2.16
 -10   4   1   72.96    2.25
 -10   4   1   68.20    3.10
 -10  -4   1   63.57    3.45
  10   4  -1   58.31    4.12
  -8   4   1  322.71    8.62
   6   4  -1   15.67    1.54
   4  -4  -1    5.25    0.85
   4   4  -1    3.49    1.05
  -4   4   1    2.94    0.87
   2   4  -1  309.88    9.13
  -2   4   1  304.96    7.35
   0   4  -1  390.80   11.10
   0   4  -1  384.90    9.06
   0   4   1  389.72    9.14
   2  -4   1   94.06    3.32
  -2   4  -1   93.16    2.75
  -4   4  -1  151.47    4.17
   4  -4   1  143.71    4.49
  -6   4  -1   31.83    1.70
  -8   4  -1  202.51    6.02
 -10   4  -1   25.55    2.03
  10   4   1   27.08    3.51
 -10   4  -1   26.62    1.43
 -12  -4  -1   16.18    1.25
 -12   4  -1   16.13    1.83
 -12  -4  -1   15.59    2.06
 -12   4  -1   21.15    1.45
 -14   4  -1   54.41    2.32
 -14  -4  -1   50.14    2.16
  16  -4   1   26.75    3.74
 -16   4  -1   25.25    1.82
 -16   4  -1   24.95    1.94
 -18   4  -1   31.85    1.95
 -18   4  -1   33.43    2.19
 -18  -4  -1   30.42    1.96
  18  -4   1   34.18    4.59
 -20   4  -1    8.85    1.09
 -20  -4  -1    8.10    1.11
 -22  -4  -1   -0.01    0.58
 -22   4  -1    0.08    0.60
 -21   5   1    0.90    0.81
 -21   5   1    0.33    0.69
 -21  -5   1    0.90    0.70
  19  -5  -1  109.00    7.10
 -19  -5   1  113.89    3.26
 -19   5   1  112.02    3.19
 -19   5   1  113.83    3.96
 -17   5   1   14.26    1.31
 -17  -5   1   13.90    1.36
 -17   5   1   12.93    1.55
  17  -5  -1   13.34    3.13
 -15   5   1    0.68    0.93
  13   5  -1  181.52    8.66
 -13  -5   1  189.22    7.11
 -13   5   1  187.36    6.61
 -13   5   1  192.05    4.65
 -11   5   1   94.25    3.96
 -11   5   1   91.10    2.69
  11   5  -1   88.93    5.47
 -11  -5   1   91.41    4.42
  -9   5   1  980.42   23.25
  -7   5   1 1628.13   36.87
  -5   5   1  505.89   12.03
   5   5  -1  491.81   14.57
  -3   5   1 1408.16   32.18
   3   5  -1 1473.62   39.30
   1   5  -1    6.81    0.99
  -1   5   1    8.24    0.90
   1   5  -1    7.85    0.91
  -1   5  -1 3150.32   83.06
  -1   5  -1 2981.69   67.87
   1   5   1 3145.68   68.19
   3  -5   1   22.05    1.45
  -3   5  -1   21.66    1.28
  -5   5  -1 1917.72   42.86
  -7   5  -1  697.94   16.76
  -9   5  -1  858.56   20.68
 -11   5  -1    5.00    0.76
 -11   5  -1    5.23    1.24
 -13   5  -1  544.48   10.32
 -13   5  -1  522.96   14.58
 -13  -5  -1  550.42   15.35
 -15   5  -1    3.35    0.86
 -15   5  -1    3.98    1.26
 -17  -5  -1    6.74    1.12
 -17   5  -1    6.59    1.27
  17  -5   1    7.86    2.70
 -17   5  -1    7.73    1.15
 -19  -5  -1   52.03    2.28
 -19   5  -1   48.03    2.61
 -19   5  -1   48.50    2.17
 -21  -5  -1    5.89    0.92
 -21   5  -1    5.48    0.92
 -21   5  -1    6.19    1.09
 -20   6   1   76.23    3.13
 -20  -6   1   73.79    2.48
 -18   6   1  114.55    4.11
 -18  -6   1  119.90    3.33
  18  -6  -1  114.88    6.98
 -16   6   1   15.67    1.64
 -14   6   1   -0.32    0.62
 -12  -6   1  197.02    7.22
 -12   6   1  185.67    6.43
 -12   6   1  185.30    4.46
  12   6  -1  176.05    8.30
 -10   6   1  713.03   12.26
  10   6  -1  653.58   18.77
 -10   6   1  729.09   17.49
  -8   6   1 2378.74   53.48
  -6   6   1 2286.41   51.07
   4   6  -1    6.18    1.04
  -4   6   1    6.55    0.90
  -2   6   1  320.90    7.73
   2   6  -1  293.96    9.48
   0   6  -1  306.75    7.71
   0   6   1  310.79    7.77
   0   6  -1  313.12    9.46
  -2   6  -1  141.91    4.02
  -4   6  -1 2332.92   51.80
  -6   6  -1 3188.46   70.72
  -8   6  -1  548.33   13.76
 -10   6  -1  566.15   14.47
 -10   6  -1  553.56   10.13
 -12  -6  -1    4.07    1.71
 -12   6  -1    2.94    0.72
 -12   6  -1    3.95    1.20
 -14   6  -1  114.41    3.49
 -14   6  -1  107.69    4.42
 -16   6  -1   13.78    1.55
 -16   6  -1   17.33    1.56
  18  -6   1   48.85    4.94
 -18   6  -1   54.77    2.76
 -18  -6  -1   47.24    2.21
 -20  -6  -1    3.74    0.88
 -20   6  -1    7.17    1.25
  21   7  -1   16.84    2.94
 -21   7   1   15.81    1.60
 -21  -7   1   15.61    1.26
 -19  -7   1   28.23    1.70
 -19   7   1   27.58    2.21
  17  -7  -1   33.57    4.30
 -17  -7   1   30.48    1.87
 -15   7   1   64.70    3.47
 -13   7   1    3.35    1.29
 -13   7   1    6.28    1.04
 -13  -7   1    3.52    1.74
 -11   7   1  143.89    3.65
 -11   7   1  141.12    5.25
  11   7  -1  145.69    7.07
  -9   7   1   21.58    2.02
   9   7  -1   27.82    3.62
  -7   7   1 2577.17   57.65
  -5   7   1  357.69    9.18
  -3   7   1  724.50   16.84
   3   7  -1  711.93   20.67
  -1   7   1    6.77    0.93
   1   7  -1    6.52    0.96
  -1   7  -1   25.93    1.45
   1   7   1   26.45    1.59
  -3   7  -1  850.74   19.72
  -5   7  -1  763.33   18.02
  -7   7  -1 2026.46   45.79
  -9   7  -1   98.85    2.75
  -9   7  -1  101.60    4.06
 -11   7  -1  118.50    3.30
 -11   7  -1  122.42    4.83
 -13   7  -1    8.56    1.14
 -13  -7  -1    7.66    2.10
 -15   7  -1   16.83    1.51
 -15   7  -1   18.45    2.07
  17  -7   1    8.94    2.77
 -17   7  -1    8.94    1.44
 -17  -7  -1    9.57    1.21
 -19  -7  -1   18.91    1.58
 -19   7  -1   23.52    2.04
 -21  -7  -1   -0.44    0.58
 -21   7  -1    0.79    0.81
 -20  -8   1   12.69    1.13
  20   8  -1   13.72    2.88
 -20   8   1   13.81    1.54
 -18   8   1    1.76    1.05
  18  -8  -1    3.16    2.32
 -16   8   1    5.52    1.25
 -16   8   1    7.29    1.60
 -14   8   1   38.72    2.71
 -12   8   1    9.46    1.07
 -12   8   1    7.66    1.50
 -10   8   1   41.39    1.77
 -10   8   1   45.01    2.67
  -8   8   1  102.69    3.98
  -6   8   1  389.74   10.19
  -4   8   1   26.12    1.63
  -2   8   1   89.19    3.17
   0   8  -1  141.02    4.42
   0   8   1  138.27    4.44
  -2   8  -1  125.42    3.98
  -4   8  -1  160.46    4.88
  -6   8  -1  871.05   20.68
 -10   8  -1   60.69    3.20
 -10   8  -1   62.59    2.21
 -12   8  -1    4.87    0.87
 -12   8  -1    4.61    1.36
 -14   8  -1   56.13    3.20
 -14   8  -1   55.44    2.41
 -16   8  -1    1.40    1.00
 -16   8  -1    0.64    1.06
 -18  -8  -1    1.18    0.78
  18  -8   1    2.56    2.25
 -18   8  -1    2.42    1.11
 -20  -8  -1    2.21    0.78
 -20   8  -1    6.26    1.25
 -21   9   1    0.16    0.77
 -19   9   1  114.81    4.10
  19   9  -1  111.09    6.26
  17   9  -1   38.48    4.29
 -17   9   1   39.77    2.47
 -17   9   1   40.04    2.90
 -15   9   1    3.16    1.10
 -15   9   1    4.17    1.33
 -13   9   1   22.97    2.16
 -11   9   1   34.86    2.47
   9   9  -1   22.19    3.09
  -9   9   1   18.05    1.79
  -7   9   1 1870.26   42.68
  -5   9   1  733.49   17.70
  -3   9   1  890.82   20.97
   1   9  -1    6.39    1.01
  -1   9   1    4.27    0.88
  -1   9  -1   11.04    1.26
   1   9   1    8.44    1.18
  -3   9  -1   52.60    2.45
  -5   9  -1 2219.80   50.00
  -7   9  -1  969.99   23.16
  -9   9  -1  429.06   11.66
 -11   9  -1  188.52    6.59
 -13   9  -1  107.04    4.48
 -13   9  -1  103.69    3.29
 -15   9  -1   43.44    2.95
 -15   9  -1   43.60    2.52
 -17   9  -1   76.15    3.95
 -17   9  -1   79.05    3.44
 -19   9  -1   67.71    3.10
 -21   9  -1   16.46    1.50
 -20  10   1   40.63    2.34
  20  10  -1   42.12    3.83
  18  10  -1   85.59    5.63
 -18  10   1   83.41    3.57
 -16  10   1   18.49    2.22
  16  10  -1   17.60    3.30
 -16  10   1   20.92    1.98
 -14  10   1   52.76    3.19
 -14  10   1   56.65    2.77
  14  10  -1   51.20    4.57
  10  10  -1  191.35    7.84
 -10  10   1  192.40    6.60
  -8  10   1  263.31    7.92
   8  10  -1  262.72    8.92
  -6  10   1 2534.92   56.30
   6  10  -1 2454.92   55.00
  -4  10   1  191.55    5.92
  -2  10   1  154.20    4.95
   0  10   1   11.17    1.33
   0  10  -1   10.83    1.31
  -2  10  -1   10.14    1.25
  -4  10  -1  480.31   12.30
  -6  10  -1 1107.16   26.19
  -8  10  -1    0.40    0.80
 -10  10  -1  482.91   13.24
 -14  10  -1  193.34    6.53
 -14  10  -1  182.20    5.40
  14  10   1  183.06    7.99
 -16  10  -1   45.53    2.69
 -16  10  -1   44.60    3.14
 -18  10  -1   49.09    2.72
 -20  10  -1    1.00    0.91
  19  11  -1   12.54    2.60
 -19  11   1   12.09    1.57
  17  11  -1   48.39    4.27
 -17  11   1   46.11    3.17
 -17  11   1   46.38    2.71
 -15  11   1   84.45    4.19
  15  11  -1   90.09    5.66
 -15  11   1   86.37    3.59
 -13  11   1   11.10    1.80
  13  11  -1   12.10    2.70
   9  11  -1    6.01    2.04
  -9  11   1    4.23    1.24
   7  11  -1   88.95    4.59
  -7  11   1   88.41    3.86
  -5  11   1  538.36   13.80
   5  11  -1  525.77   13.90
  -3  11   1  259.25    7.61
  -1  11   1   93.47    3.71
   1  11  -1   91.55    3.68
  -1  11  -1  110.57    4.07
  -3  11  -1    8.16    1.32
  -3  11  -1    8.52    1.26
  -5  11  -1    3.73    1.17
  -7  11  -1  118.24    4.59
  -9  11  -1   62.74    3.37
 -13  11  -1   80.58    3.94
  13  11   1   75.82    5.00
 -15  11  -1   40.01    2.55
 -15  11  -1   42.07    3.02
  15  11   1   42.90    4.16
 -17  11  -1    3.47    1.38
 -17  11  -1    4.69    1.28
 -19  11  -1    9.07    1.46
 -20  12   1   76.92    3.01
 -18  12   1    4.94    1.24
  18  12  -1    6.14    2.20
  16  12  -1   41.87    3.97
 -16  12   1   44.47    3.08
 -16  12   1   41.71    2.61
 -14  12   1   49.87    3.27
  14  12  -1   52.08    4.52
 -14  12   1   55.55    2.87
  12  12  -1   50.69    4.12
 -12  12   1   52.79    3.22
 -10  12   1    6.37    1.55
   8  12  -1   29.09    3.19
  -8  12   1   26.80    2.36
  -6  12   1   23.26    2.11
   6  12  -1   25.61    2.64
   4  12  -1  357.08   10.19
  -4  12   1  366.29   10.18
  -2  12   1   89.11    3.74
   2  12  -1   88.52    3.79
  -2  12   1   89.05    3.60
   0  12   1  137.97    5.26
   0  12  -1  168.22    5.34
   0  12  -1  164.29    5.47
  -2  12  -1   78.35    3.51
  -2  12  -1   79.03    3.38
  -4  12  -1  194.54    6.36
  -4  12  -1  187.23    6.05
  -6  12  -1   99.81    4.23
  -8  12  -1   32.03    2.50
 -10  12  -1    5.32    1.43
 -12  12  -1    1.82    1.11
  12  12   1   -0.13    1.63
  14  12   1   19.53    3.09
 -14  12  -1   22.92    2.42
 -14  12  -1   20.56    1.95
 -16  12  -1    7.59    1.71
 -16  12  -1    6.87    1.43
 -18  12  -1   75.09    3.29
 -20  12  -1   37.35    2.11
 -19  13   1   91.67    3.47
  17  13  -1   39.00    3.78
 -17  13   1   38.08    2.44
 -17  13   1   37.46    2.88
 -15  13   1    3.43    1.41
  15  13  -1    0.79    1.71
 -15  13   1    0.63    1.00
 -13  13   1  190.77    6.59
 -13  13   1  178.37    5.33
  13  13  -1  161.64    7.29
  11  13  -1  133.97    6.19
 -11  13   1  141.77    5.40
  -9  13   1   26.79    2.42
   7  13  -1  176.41    6.72
  -7  13   1  171.06    6.27
   5  13  -1    7.04    1.56
  -5  13   1    7.20    1.51
   3  13  -1   17.62    2.02
  -3  13   1   16.05    1.77
  -3  13   1   18.63    1.75
  -1  13   1  766.33   18.02
   1  13  -1  749.23   18.11
  -1  13   1  741.51   18.84
   1  13   1  287.15    8.33
  -1  13  -1  302.86    8.47
  -1  13  -1  296.64    8.79
  -3  13  -1  458.68   11.80
   3  13   1  443.77   11.79
  -3  13  -1  446.99   12.22
  -5  13  -1   47.27    2.96
  -7  13  -1  484.52   13.43
  -9  13  -1   30.24    2.61
  11  13   1  113.27    5.56
 -11  13  -1  114.91    4.81
 -13  13  -1   58.39    2.94
 -13  13  -1   53.03    3.37
  13  13   1   52.91    4.23
 -15  13  -1   96.50    4.52
 -15  13  -1   92.94    3.76
 -17  13  -1    6.32    1.65
 -17  13  -1    6.81    1.38
 -19  13  -1  111.69    3.85
 -18  14   1    0.11    0.92
 -18  14   1    0.10    1.07
 -16  14   1   40.31    3.06
 -16  14   1   42.94    2.58
  16  14  -1   39.21    3.84
 -14  14   1  168.36    6.32
 -14  14   1  170.32    5.21
  14  14  -1  157.95    7.13
 -12  14   1  291.79    8.90
  12  14  -1  282.51    9.77
 -12  14   1  289.39    7.33
 -10  14   1   39.49    2.79
  10  14  -1   39.95    3.42
  -8  14   1   48.79    3.31
   6  14  -1   18.32    2.39
  -6  14   1   17.14    1.97
   4  14  -1   55.05    3.30
  -4  14   1   47.67    3.08
   2  14  -1  469.05   12.39
  -2  14   1  467.31   12.19
  -2  14   1  462.50   12.85
   0  14  -1 1708.74   39.70
   0  14  -1 1694.58   37.99
   0  14   1 1672.22   39.64
   0  14   1 1714.20   37.88
  -2  14  -1    1.69    1.07
   2  14   1    1.98    1.05
  -2  14  -1    0.83    0.84
  -4  14  -1  506.92   13.82
  -6  14  -1    1.85    1.21
 -10  14  -1  155.27    5.74
  10  14   1  151.22    6.31
 -12  14  -1  277.84    7.11
  12  14   1  253.60    9.16
 -12  14  -1  272.27    8.49
 -14  14  -1    4.73    1.16
 -14  14  -1    2.82    1.35
 -16  14  -1  103.59    3.98
 -16  14  -1  103.81    4.73
 -18  14  -1    6.48    1.29
 -17  15   1    2.94    1.35
 -17  15   1    2.25    1.07
  17  15  -1    2.90    1.72
 -15  15   1    8.06    1.47
  15  15  -1    8.87    2.33
 -15  15   1    8.54    1.89
 -13  15   1   57.61    3.67
 -13  15   1   54.65    2.95
  13  15  -1   56.14    4.32
 -11  15   1  116.22    4.10
 -11  15   1  112.69    4.99
  11  15  -1  115.79    5.62
   9  15  -1   17.83    2.43
  -9  15   1   18.35    2.01
  -5  15   1   28.03    2.57
   5  15  -1   32.47    2.84
   3  15  -1  287.28    8.70
  -3  15   1  280.90    8.45
  -3  15   1  279.72    9.00
   1  15  -1  476.03   12.35
  -1  15   1  445.34   12.03
  -1  15   1  431.70   12.68
  -1  15  -1  321.09    9.84
   1  15   1  312.62    9.22
  -1  15  -1  321.95    9.36
  -3  15  -1    0.23    0.82
  -3  15  -1    1.77    1.14
  -5  15  -1   52.27    3.30
  -9  15  -1   21.51    2.22
   9  15   1   20.02    2.53
 -11  15  -1  114.78    4.99
  11  15   1  108.26    5.37
 -11  15  -1  105.73    4.03
 -13  15  -1    1.67    1.00
 -13  15  -1    2.64    1.38
 -15  15  -1    8.65    1.84
 -15  15  -1    5.41    1.36
 -17  15  -1   26.21    2.11
 -17  15  -1   24.35    2.42
 -18  16   1    2.01    0.94
 -16  16   1   46.29    2.60
  16  16  -1   47.95    3.72
 -16  16   1   46.74    3.15
 -14  16   1   61.47    3.04
  14  16  -1   65.06    4.35
 -14  16   1   65.05    3.85
  12  16  -1  201.34    7.77
 -12  16   1  196.37    5.74
 -12  16   1  205.79    7.21
  10  16  -1   58.62    3.98
 -10  16   1   67.31    3.78
  -8  16   1    4.51    1.35
   8  16  -1    2.80    1.45
  -8  16   1   -0.20    2.47
  -6  16   1    0.95    2.81
  -4  16   1  199.91    7.57
   4  16  -1  230.41    7.57
  -2  16   1    2.69    1.41
  -2  16   1    1.64    1.15
   0  16  -1  319.80    9.55
   0  16   1  318.05    9.42
  -2  16  -1   47.27    3.12
  -2  16  -1   49.90    3.39
  -4  16  -1  123.59    5.50
  -8  16  -1   19.72    2.20
   8  16   1   23.58    2.59
  10  16   1   18.51    2.51
 -10  16  -1   19.65    2.34
 -10  16  -1   20.75    1.97
 -12  16  -1  202.31    7.18
 -12  16  -1  202.52    5.92
 -14  16  -1   13.71    2.15
 -14  16  -1   15.27    1.73
 -16  16  -1   62.94    3.60
 -16  16  -1   64.80    3.03
 -17  17   1   34.02    2.57
 -17  17   1   35.10    2.12
  15  17  -1   24.45    2.91
 -15  17   1   26.27    2.08
 -15  17   1   25.22    2.56
 -13  17   1  405.68    9.44
  13  17  -1  408.36   12.13
 -13  17   1  416.24   11.65
  11  17  -1  116.55    5.57
 -11  17   1  115.30    5.23
   9  17  -1   27.35    2.88
  -9  17   1   23.86    2.50
  -7  17   1   -0.27    2.72
  -7  17   1    0.71    0.99
   7  17  -1   -0.70    1.10
   5  17  -1    5.84    1.53
  -5  17   1    6.47    1.44
   1  17  -1  937.13   23.03
  -1  17   1  957.43   22.92
  -3  17  -1    1.73    3.14
   5  17   1   63.95    3.67
  -5  17  -1   61.02    3.42
   7  17   1   14.14    2.11
  -7  17  -1   11.96    1.83
  -9  17  -1   25.81    2.58
   9  17   1   32.01    2.93
 -11  17  -1  149.34    5.95
 -11  17  -1  144.13    4.79
  11  17   1  138.67    6.10
 -13  17  -1  155.23    4.98
 -13  17  -1  157.23    6.11
 -15  17  -1   35.79    2.35
 -15  17  -1   34.72    2.82
 -17  17  -1   44.48    2.88
 -17  17  -1   52.06    2.50
 -16  18   1    0.46    0.87
 -16  18   1    0.17    1.06
 -14  18   1   61.11    2.97
  14  18  -1   67.99    4.11
 -14  18   1   65.74    3.77
 -12  18   1  105.67    4.93
  12  18  -1  103.56    5.20
  10  18  -1    4.26    1.64
 -10  18   1    3.40    1.48
  -8  18   1    0.72    1.09
  -8  18   1   -0.57    2.89
   8  18  -1    1.33    1.28
  -6  18   1   48.04    3.12
   6  18  -1   44.51    3.30
   4  18  -1   25.17    2.55
  -2  18  -1   13.81    2.05
   2  18   1    9.75    1.79
  -2  18  -1   11.86    1.84
  -4  18  -1   70.55    3.78
   4  18   1   73.32    4.00
   6  18   1    8.70    1.81
  -6  18  -1    0.68    3.19
  -6  18  -1    7.32    1.59
   8  18   1   40.88    3.20
  -8  18  -1   35.18    2.89
 -10  18  -1   53.57    3.55
  10  18   1   58.12    3.80
 -12  18  -1   31.41    2.35
 -12  18  -1   30.64    2.83
 -14  18  -1    8.91    1.81
 -14  18  -1    8.98    1.46
 -16  18  -1    3.42    1.27
 -16  18  -1    3.92    1.03
 -15  19   1    3.26    1.30
  13  19  -1   25.85    2.78
 -13  19   1   24.07    2.61
  11  19  -1    5.06    1.75
 -11  19   1    2.94    1.49
   9  19  -1   41.47    3.35
  -9  19   1   41.79    3.11
  -7  19   1   -0.80    3.07
   7  19  -1    2.02    1.35
  -7  19   1    2.87    1.28
  -5  19   1    1.49    1.11
  -5  19   1    0.28    3.18
   5  19  -1    0.65    1.09
  -3  19   1   40.33    2.90
   3  19  -1   38.28    3.02
  -1  19   1    2.37    1.18
   1  19  -1    0.87    1.12
   1  19  -1   -0.28    3.48
  -1  19   1   -1.10    3.27
   1  19  -1    1.71    1.30
   1  19   1   15.88    2.10
  -1  19  -1   14.19    2.02
   3  19   1  266.72    8.41
  -3  19  -1  253.80    8.26
  -5  19  -1   -0.89    3.15
  -5  19  -1    0.25    0.99
   5  19   1    1.20    1.19
   7  19   1   20.02    2.60
  -7  19  -1   20.02    2.34
  -9  19  -1  112.03    5.09
   9  19   1  113.25    5.24
 -11  19  -1    0.36    1.31
 -13  19  -1   33.75    2.84
 -15  19  -1    1.55    0.93
 -15  19  -1    0.80    1.13
 -14  20   1   86.58    4.11
  12  20  -1   31.51    2.96
 -12  20   1   28.42    2.73
  10  20  -1   34.49    3.13
 -10  20   1   32.37    3.00
  -8  20   1   -0.86    2.99
  -8  20   1    1.04    1.24
   8  20  -1    2.32    1.41
   6  20  -1   14.55    2.22
  -6  20   1   13.11    2.04
   4  20  -1  102.28    4.88
  -4  20   1   95.61    4.54
  -2  20   1   -0.77    3.44
  -2  20   1    1.64    1.15
   2  20  -1    1.11    1.13
   2  20  -1    0.00    3.28
   4  20   1  235.96    8.03
  -4  20  -1  245.01    7.99
  -6  20  -1   -0.10    1.14
  -6  20  -1   -0.51    3.23
   6  20   1    1.21    1.28
   8  20   1   12.71    2.16
  -8  20  -1   13.52    2.10
 -10  20  -1    5.05    1.65
 -10  20  -1    0.89    3.70
 -12  20  -1  123.78    5.29
 -13  21   1   22.29    2.31
 -11  21   1   -0.21    1.20
  11  21  -1    0.94    1.35
  -9  21   1    1.72    1.31
   9  21  -1    1.50    1.46
  -9  21   1   -0.10    3.37
  -7  21   1  194.11    7.04
   7  21  -1  200.75    7.25
   5  21  -1   45.18    3.32
  -5  21   1   48.88    3.31
   3  21  -1   60.79    3.75
  -3  21   1   59.31    3.59
   3  21   1   13.25    2.10
  -3  21  -1   13.91    2.09
  -5  21  -1   56.11    3.55
   5  21   1   58.79    3.65
   7  21   1   56.11    3.65
  -7  21  -1   57.87    3.66
 -11  21  -1    3.35    1.43
 -13  21  -1   73.00    3.76
 -12  22   1   17.33    2.08
  10  22  -1   12.78    2.06
 -10  22   1   10.44    1.89
   8  22  -1  231.69    7.87
  -8  22   1  225.12    7.71
   6  22  -1  218.63    7.61
  -6  22   1  212.32    7.47
   4  22  -1   16.49    2.26
  -4  22   1   17.96    2.23
  -2  22   1   75.56    4.08
   2  22  -1   76.41    4.17
   2  22   1    6.44    1.63
  -2  22  -1    0.07    3.43
   2  22   1   -0.67    3.35
  -2  22  -1    9.50    1.81
   4  22   1   98.91    4.70
  -4  22  -1   92.83    4.61
   6  22   1  238.31    8.07
  -6  22  -1  248.10    8.16
 -10  22  -1   -0.01    3.26
 -10  22  -1    9.22    1.80
 -12  22  -1    7.36    1.56
 -11  23   1    4.26    1.35
   9  23  -1   89.60    4.38
  -9  23   1   90.67    4.37
   7  23  -1   51.70    3.44
  -7  23   1   46.33    3.32
   5  23  -1    2.89    1.44
  -5  23   1    4.71    1.54
  -5  23   1    1.49    3.89
  -3  23   1    5.43    1.58
  -3  23   1    0.04    3.91
   3  23  -1    5.03    1.64
   1  23   1    0.28    1.15
  -1  23  -1    2.58    1.38
  -1  23  -1   -0.12    3.78
   1  23   1   -0.11    3.93
  -3  23  -1    9.78    1.92
   3  23   1   11.25    1.99
  -5  23  -1    0.70    3.80
  -5  23  -1    3.21    1.47
   5  23   1    1.24    1.31
  -7  23  -1   10.33    1.93
  -7  23  -1    0.55    3.59
  -9  23  -1   10.19    1.83
  -9  23  -1    0.38    3.36
 -11  23  -1    1.56    1.13
  -8  24   1   12.15    1.92
   8  24  -1   10.64    1.88
  -6  24   1  107.84    4.86
   6  24  -1  108.22    4.87
  -4  24   1    0.65    3.47
   4  24  -1    0.18    1.18
  -4  24   1   -0.60    1.12
  -2  24   1  146.87    5.82
   2  24  -1  152.18    5.95
  -2  24  -1   71.81    3.94
   2  24   1   66.77    3.82
  -4  24  -1   10.02    1.93
   4  24   1    9.99    1.89
  -6  24  -1  125.07    5.23
   6  24   1  118.79    5.11
  -8  24  -1    0.53    3.28
  -8  24  -1    1.95    1.24
   7  25  -1  209.11    6.90
  -7  25   1  204.94    6.81
  -5  25   1  126.74    5.20
   5  25  -1  128.46    5.22
  -3  25   1   10.47    1.86
   3  25  -1   11.83    1.94
  -1  25   1   16.73    2.15
   1  25  -1   18.11    2.25
  -1  25  -1    0.33    3.67
   1  25   1   -0.17    1.10
  -1  25  -1    1.54    1.21
   1  25   1   -0.60    3.19
  -3  25  -1   34.69    2.85
   3  25   1   39.00    2.90
  -4  26   1   53.46    3.20
   4  26  -1   57.67    3.29
   2  26  -1    3.95    1.31
  -2  26   1   -0.05    1.03
  -2  26   1   -2.08    3.07
   0  26  -1   -1.60    3.08
   0  26   1   -1.02    3.01
   0  26  -1    1.23    1.17
   0  26   1    2.02    1.17
  -2  26  -1  118.82    4.89
   2  26   1  118.95    4.79
 -22   0   2   28.26    1.59
 -20   0   2   25.29    1.69
  18   0  -2  134.40    8.27
 -18   0   2  140.84    3.76
  16   0  -2   11.57    3.20
 -14   0   2  896.96   22.61
  14   0  -2  898.25   23.98
 -12   0   2 2447.52   57.92
  12   0  -2 2661.42   57.65
 -12   0   2 2547.14   40.94
  10   0  -2   51.26    3.48
 -10   0   2   49.62    2.70
  -8   0   2   13.87    1.37
  -6   0   2 3673.57   80.64
   6   0  -2 3639.75   98.16
   4   0  -2 1183.43   31.24
  -4   0   2 1149.17   25.82
  -4   0   2 1116.26   31.04
  -2   0   2 6809.23  185.49
   2   0  -2 6920.62  185.97
   0   0  -2 9999.55  284.91
  -4   0  -2 3341.23   77.05
  -4   0  -2 3660.03   95.28
  -6   0  -2  125.36    4.11
  -8   0  -2  139.15    4.74
 -10   0  -2  120.89    4.63
 -10   0  -2  124.74    3.16
 -12   0  -2  598.38   11.20
  12   0   2  667.01   17.14
 -12   0  -2  585.44   16.11
 -14   0  -2    5.90    0.98
 -14   0  -2    5.42    1.60
 -16   0  -2  865.89   15.81
 -18   0  -2   42.90    2.16
 -20   0  -2   30.49    1.84
 -22   0  -2   52.64    2.01
 -21   1   2   20.07    1.49
 -21  -1   2   19.61    1.49
 -19   1   2   -0.94    0.61
  19  -1  -2    0.69    2.61
 -19  -1   2   -0.11    0.66
  17   1  -2   95.53    6.92
  17  -1  -2  105.52    6.90
 -17   1   2   99.34    3.50
  15   1  -2   26.11    3.76
  15  -1  -2   32.97    3.87
 -13   1   2 1179.15   29.31
 -13   1   2 1230.00   20.75
  13  -1  -2 1291.96   30.42
  13   1  -2 1212.48   30.54
 -13  -1   2 1205.82   29.53
  11   1  -2  623.96   16.45
 -11   1   2  587.42   15.10
 -11   1   2  571.42   10.55
 -11  -1   2  589.44   15.22
 -11  -1   2  582.49   10.59
  -9   1   2  124.61    4.27
  -9  -1   2  117.79    4.32
  -7  -1   2 1119.58   25.64
  -7   1   2 1096.90   25.43
  -5   1   2 4684.48  102.77
   5  -1  -2 4709.75  125.28
   5   1  -2 4721.41  124.47
  -5  -1   2 4398.36  122.84
  -3  -1   2  343.08    9.75
   3  -1  -2  334.39    9.56
   3   1  -2  340.26    9.76
   1   1  -2 4395.86  117.94
  -1  -1   2 4219.30  117.23
   1  -1   2 1253.45   35.62
  -1   1  -2 1364.51   36.33
  -3   1  -2  327.55    9.69
  -3   1  -2  345.01    8.10
  -5  -1  -2   21.78    1.22
  -5   1  -2   17.29    1.33
  -7  -1  -2  213.71    6.36
  -7   1  -2  210.62    6.14
  -9  -1  -2  138.10    4.94
  -9   1  -2  134.70    4.76
 -11   1  -2  334.58    9.84
  11   1   2  384.69   11.03
 -11  -1  -2  334.03    9.97
 -11  -1  -2  335.52    6.77
 -11   1  -2  332.72    6.82
 -13   1  -2   36.48    2.74
  13  -1   2   41.47    3.57
 -13  -1  -2   38.64    2.88
 -13   1  -2   34.01    1.80
 -13  -1  -2   36.03    1.84
 -15   1  -2  162.07    4.42
 -15  -1  -2  157.62    4.35
 -17  -1  -2   -0.29    0.80
 -17   1  -2   -0.65    0.82
 -19   1  -2  124.69    3.60
 -19  -1  -2  123.61    3.57
 -21  -1  -2    0.79    0.71
 -21   1  -2    0.41    0.69
 -22   2   2   31.80    1.61
 -22  -2   2   31.72    1.62
 -20  -2   2   15.53    1.33
 -20   2   2   17.72    1.49
 -18  -2   2    7.38    1.14
 -18   2   2    7.37    1.27
  18  -2  -2    5.93    3.06
 -18   2   2    5.93    1.07
  18   2  -2    5.41    3.49
  16  -2  -2   33.68    4.23
  16   2  -2   31.50    4.51
 -14  -2   2   57.06    3.52
  14  -2  -2   66.76    4.80
  14   2  -2   61.08    5.06
 -14   2   2   63.79    3.63
  12   2  -2   51.44    4.09
 -12  -2   2   50.35    3.02
 -12  -2   2   50.64    2.08
 -10   2   2  436.43   11.43
  10   2  -2  442.26   12.68
 -10  -2   2  427.94   11.69
  -8   2   2   17.46    1.38
  -8  -2   2   16.79    1.64
  -6   2   2 2396.32   53.11
   6   2  -2 2433.19   64.15
   6  -2  -2 2353.43   64.31
   4  -2  -2  228.94    6.59
  -4   2   2  224.79    5.71
  -4  -2   2  225.50    7.05
   4   2  -2  228.79    6.97
  -2  -2   2   32.19    1.53
   2   2  -2   33.03    1.53
   0   2  -2   16.86    0.98
   0  -2   2   14.60    0.94
   2  -2   2   68.03    2.33
  -2   2  -2   71.15    2.35
  -4   2  -2  944.94   22.16
  -4  -2  -2 1010.63   26.62
  -6   2  -2  197.36    5.60
  -8   2  -2   93.41    3.53
 -10   2  -2    0.73    0.50
 -10  -2  -2    0.30    0.87
 -10   2  -2    1.53    0.85
 -12  -2  -2   13.50    1.84
 -12   2  -2   13.95    1.81
 -12  -2  -2   10.18    1.06
 -14   2  -2   11.97    1.28
 -14  -2  -2   11.55    2.03
  14  -2   2   14.90    2.85
 -14  -2  -2   12.59    1.25
 -16   2  -2   14.46    1.50
 -18   2  -2   68.12    2.67
 -18  -2  -2   72.87    2.78
 -20  -2  -2   12.45    1.30
 -20   2  -2   12.78    1.27
 -22   2  -2    1.00    0.67
 -22  -2  -2    0.96    0.66
 -21   3   2    2.10    0.89
 -21   3   2    1.82    0.77
 -21  -3   2    3.09    0.83
 -19   3   2   69.40    3.00
  19  -3  -2   75.66    6.26
 -19  -3   2   76.57    2.65
 -19   3   2   74.42    2.55
  17  -3  -2   21.17    3.78
  17   3  -2   27.11    4.56
 -17   3   2   23.92    2.01
  15  -3  -2   53.38    4.44
  15   3  -2   49.13    4.99
 -13   3   2  726.10   12.95
  13   3  -2  668.48   19.95
 -13  -3   2  743.15   18.76
 -13   3   2  721.17   18.37
  11   3  -2   48.42    4.08
 -11  -3   2   46.00    2.87
 -11   3   2   53.19    1.95
 -11   3   2   54.17    2.88
 -11  -3   2   48.03    1.87
  -9  -3   2  982.70   23.71
  -9   3   2  987.95   23.21
  -7   3   2  828.36   19.23
   7   3  -2  815.75   22.87
  -5   3   2 1026.50   23.94
   5   3  -2 1082.72   29.08
   5  -3  -2 1064.54   28.63
  -3   3   2 2688.20   60.21
   3   3  -2 2795.48   73.35
   1   3  -2  120.92    3.94
  -1  -3   2  113.66    3.93
  -1   3  -2 2540.25   67.62
   1  -3   2 2441.79   66.86
  -3   3  -2 1440.79   37.66
   3  -3   2 1339.01   37.54
  -3   3  -2 1404.52   31.08
  -5   3  -2   34.58    1.66
  -7   3  -2  442.49   11.15
  -9   3  -2   36.25    2.16
 -11   3  -2  124.91    4.84
 -11  -3  -2  125.04    3.31
 -11   3  -2  140.74    3.54
 -11  -3  -2  130.07    5.29
 -13   3  -2  170.31    4.42
 -13   3  -2  175.46    6.40
 -13  -3  -2  177.49    4.36
 -13  -3  -2  174.70    6.74
  15  -3   2   31.58    3.74
 -15  -3  -2   29.56    1.76
 -15   3  -2   28.47    1.77
 -17  -3  -2   49.68    2.30
 -17   3  -2   44.11    2.19
 -19  -3  -2  109.81    3.37
 -19   3  -2  107.40    3.28
 -21  -3  -2    2.06    0.78
 -21   3  -2    1.10    0.76
 -22  -4   2    0.65    0.63
 -22   4   2    0.77    0.60
 -22   4   2    1.04    0.72
 -20  -4   2  101.19    3.00
 -20   4   2  105.29    3.62
 -20   4   2   97.80    2.93
 -18   4   2    4.61    0.96
 -18  -4   2    5.54    1.03
  18  -4  -2    3.32    2.57
 -18   4   2    4.52    1.16
  16  -4  -2   64.75    5.04
  16   4  -2   61.94    5.81
 -14  -4   2  140.67    5.87
 -14   4   2  139.84    5.61
  14   4  -2  137.61    7.69
  12   4  -2   98.69    5.80
 -12  -4   2   99.41    4.53
 -12   4   2  101.83    4.30
 -12   4   2  101.88    2.98
 -10   4   2  513.29   12.94
 -10   4   2  499.47    9.07
 -10  -4   2  515.32   13.56
  10   4  -2  466.59   14.29
  -8   4   2  746.04   17.82
   6   4  -2 2548.76   67.92
  -6   4   2 2503.76   56.05
  -4   4   2  135.49    3.89
   4   4  -2  137.77    4.89
  -2   4   2  100.87    2.88
   2   4  -2  100.39    3.75
   0   4   2  523.26   12.11
   0   4  -2  510.86   11.98
   0   4  -2  532.49   14.79
  -2   4  -2   64.76    2.45
   2  -4   2   62.31    2.53
  -2   4  -2   64.89    2.10
   4  -4   2 2627.50   71.53
  -4   4  -2 2730.75   59.20
  -6   4  -2  541.77   13.17
  -8   4  -2   48.69    2.48
 -10   4  -2   36.35    2.37
 -10   4  -2   36.00    1.65
 -12   4  -2  163.36    5.96
 -12  -4  -2  170.43    6.48
 -12  -4  -2  165.05    4.03
 -12   4  -2  161.46    4.16
 -14  -4  -2   46.47    2.07
 -14   4  -2   50.78    2.26
  16  -4   2   26.31    3.78
 -16   4  -2   21.65    1.84
 -16   4  -2   24.62    1.81
 -18  -4  -2   65.53    2.56
 -18   4  -2   65.76    2.99
 -18   4  -2   64.88    2.52
 -20  -4  -2   24.55    1.63
 -20   4  -2   20.36    1.57
 -22  -4  -2    5.94    0.83
 -22   4  -2    6.23    0.86
 -21   5   2   60.24    2.15
 -21  -5   2   57.68    2.14
 -21   5   2   58.09    2.59
 -19   5   2   76.63    3.22
 -19  -5   2   77.58    2.62
  19  -5  -2   71.13    5.99
 -19   5   2   77.58    2.60
 -17  -5   2   58.30    2.40
  17  -5  -2   60.52    5.15
 -17   5   2   56.23    2.82
 -15   5   2  104.80    4.33
  15   5  -2  101.81    6.94
 -13   5   2    2.55    0.84
 -13   5   2    3.87    1.30
  13   5  -2    8.48    3.01
 -13  -5   2    3.65    1.63
 -11  -5   2   10.90    1.87
 -11   5   2   11.49    1.00
  11   5  -2    8.74    2.36
 -11   5   2    9.18    1.47
  -9   5   2    0.55    0.76
   7   5  -2 1652.78   45.16
  -7   5   2 1650.47   37.33
  -5   5   2  308.06    7.80
   5   5  -2  306.57    9.59
  -3   5   2   79.82    2.56
   3   5  -2   75.90    3.28
   1   5  -2  525.25   15.03
   1   5  -2  520.65   12.27
   1   5   2 1299.91   28.52
  -1   5  -2 1231.64   28.17
  -1   5  -2 1256.48   34.32
  -3   5  -2 1215.84   27.35
  -5   5  -2  106.91    3.59
  -7   5  -2  348.25    9.17
  -9   5  -2  156.07    5.24
 -11   5  -2   42.82    2.66
 -11   5  -2   42.12    1.85
 -13   5  -2   84.83    2.88
 -13   5  -2   81.18    4.06
 -13  -5  -2   85.00    4.61
 -15   5  -2   22.13    1.64
 -15   5  -2   19.64    2.12
 -17  -5  -2   30.78    1.88
  17  -5   2   28.25    3.99
 -17   5  -2   27.58    1.84
 -17   5  -2   29.25    2.16
 -19  -5  -2    1.49    0.91
 -19   5  -2    1.90    1.03
 -19   5  -2    0.65    0.81
 -21   5  -2    1.12    0.73
 -21  -5  -2    1.34    0.71
 -22   6   2   19.36    1.52
 -22  -6   2   17.80    1.17
  22   6  -2   23.12    3.04
 -20   6   2    5.01    1.16
  18  -6  -2   20.55    3.67
 -18  -6   2   23.41    1.64
 -18   6   2   21.60    2.05
 -16   6   2   39.53    2.37
  16  -6  -2   40.04    4.26
  14   6  -2   -1.24    2.18
  12   6  -2    6.88    2.73
 -12   6   2    7.30    0.97
 -12   6   2    8.43    1.55
 -12  -6   2    8.29    1.90
 -10   6   2   20.63    1.27
  10   6  -2   17.60    2.83
 -10   6   2   20.97    1.81
  -8   6   2  553.84   13.81
   6   6  -2   83.00    3.80
  -6   6   2   86.64    3.12
  -4   6   2  134.96    3.93
   4   6  -2  125.68    4.90
   2   6  -2    0.77    0.67
  -2   6   2    0.62    0.50
   0   6  -2   58.11    2.11
   0   6  -2   54.85    2.61
   0   6   2   56.72    2.19
  -2   6  -2    5.91    0.94
  -2   6  -2    5.00    0.72
  -4   6  -2  192.23    5.39
  -8   6  -2  124.10    4.37
 -12  -6  -2  138.14    6.05
 -12   6  -2  135.04    3.68
 -12   6  -2  129.22    5.19
 -14   6  -2    5.37    1.32
 -14   6  -2    3.01    0.80
 -16   6  -2    7.00    1.20
 -16   6  -2    3.64    1.09
 -18  -6  -2    0.14    0.74
 -18   6  -2   -0.68    0.83
 -20  -6  -2   -0.91    0.64
 -20   6  -2    0.15    0.84
 -21  -7   2    6.78    0.89
  21   7  -2   13.29    2.76
 -21   7   2    7.95    1.22
 -19   7   2  223.70    6.01
 -19  -7   2  207.01    4.61
 -17   7   2   43.21    2.56
  17  -7  -2   42.74    4.58
 -17  -7   2   39.28    2.02
 -15   7   2   25.54    2.34
 -13   7   2  171.95    6.30
 -13  -7   2  178.59    7.05
  13   7  -2  156.29    8.17
 -13   7   2  174.87    4.39
 -11   7   2  171.96    5.85
  11   7  -2  164.60    7.66
 -11   7   2  163.69    4.00
  -9   7   2   14.93    1.72
   9   7  -2    8.41    2.51
  -7   7   2 1939.87   43.80
  -5   7   2  445.80   11.06
   5   7  -2  443.89   13.68
   3   7  -2  454.23   13.71
  -3   7   2  448.80   11.05
   1   7  -2  787.57   22.27
   1   7  -2  780.20   18.24
  -1   7   2  779.48   18.17
  -1   7  -2  145.15    4.17
   1   7   2  145.67    4.37
  -1   7  -2  134.65    5.02
  -3   7  -2  305.89    7.91
  -5   7  -2 1807.02   40.70
  -7   7  -2 1958.45   44.36
  -9   7  -2  521.71   13.43
  -9   7  -2  505.73    9.34
 -11   7  -2   14.32    1.77
 -11   7  -2   15.20    1.27
 -13   7  -2  324.62    6.99
 -15   7  -2   52.11    2.66
 -15   7  -2   50.02    3.11
 -15   7  -2   54.65    2.45
 -17   7  -2    0.06    0.89
  17  -7   2    2.51    2.11
 -17  -7  -2    2.11    0.87
 -19   7  -2   12.95    1.56
 -19  -7  -2   11.94    1.21
 -21  -7  -2    5.86    0.85
 -21   7  -2    6.91    1.12
 -20  -8   2  118.06    3.17
  20   8  -2  138.82    6.88
 -20   8   2  137.35    4.30
  18  -8  -2  123.95    7.28
 -18   8   2  131.52    4.43
 -16   8   2   25.83    2.09
 -16   8   2   25.12    2.41
 -14   8   2    1.04    1.00
 -12   8   2  117.58    3.29
 -12   8   2  109.97    4.69
  12   8  -2  112.00    6.46
  10   8  -2    0.77    1.64
 -10   8   2    0.46    0.52
 -10   8   2    2.12    0.97
  -8   8   2 2387.04   53.10
   8   8  -2 2315.69   52.88
  -6   8   2 1618.22   36.86
  -4   8   2   20.90    1.48
   4   8  -2   15.47    1.68
  -2   8   2  561.02   13.19
   2   8  -2  521.76   16.14
   0   8  -2   27.25    2.03
   0   8  -2   33.03    1.82
   0   8   2   28.10    1.77
  -2   8  -2  394.14    9.89
  -4   8  -2 1833.93   41.33
  -6   8  -2 1600.67   36.54
  -8   8  -2   11.36    1.56
 -10   8  -2  748.77   18.68
 -10   8  -2  731.00   13.03
 -12   8  -2   80.31    4.06
 -12   8  -2   83.07    2.78
 -14   8  -2  163.23    5.81
 -14   8  -2  160.98    4.42
 -16   8  -2    4.40    1.36
 -16   8  -2    3.00    0.98
 -16   8  -2    2.85    1.08
 -18  -8  -2   71.49    2.55
 -18   8  -2   73.48    3.28
 -20  -8  -2   -1.07    0.59
 -20   8  -2   -0.42    0.85
  21   9  -2    1.00    1.75
 -21   9   2    2.36    0.93
 -19   9   2   20.67    2.03
  19   9  -2   20.15    3.36
  17   9  -2   54.74    4.90
 -17   9   2   56.01    3.38
 -17   9   2   58.92    2.95
 -15   9   2    4.34    1.20
 -15   9   2    6.72    1.52
 -13   9   2    0.35    0.88
  13   9  -2    1.74    2.15
  11   9  -2    5.38    2.12
 -11   9   2    5.96    1.37
  -9   9   2   36.40    2.38
   9   9  -2   36.47    3.43
   7   9  -2  708.12   18.58
  -7   9   2  743.87   17.85
  -5   9   2  383.89   10.07
  -3   9   2  108.47    3.81
   1   9  -2   11.28    1.29
  -1   9   2   12.91    1.27
   1   9   2   14.02    1.44
  -1   9  -2   12.93    1.33
  -3   9  -2  599.66   14.62
  -5   9  -2  268.11    7.55
  -7   9  -2  159.55    5.36
  -9   9  -2   58.38    3.04
 -11   9  -2    2.14    1.14
 -13   9  -2   35.61    2.66
 -13   9  -2   34.39    1.91
 -15   9  -2   32.67    2.23
 -15   9  -2   34.30    2.68
 -15   9  -2   35.48    2.05
 -17   9  -2    4.05    1.36
 -17   9  -2    3.94    1.17
 -19   9  -2    6.82    1.35
  20  10  -2   50.88    4.12
 -20  10   2   47.26    2.52
 -18  10   2    0.98    1.10
  18  10  -2    0.88    2.20
 -16  10   2   88.65    3.65
  16  10  -2   87.92    5.90
 -16  10   2   89.64    4.36
 -14  10   2   10.90    1.72
  14  10  -2   11.34    2.82
  12  10  -2   13.09    2.86
  10  10  -2   10.81    2.42
 -10  10   2   10.16    1.60
   8  10  -2   76.70    4.44
  -8  10   2   75.22    3.44
   6  10  -2  215.42    7.37
  -6  10   2  215.32    6.64
  -4  10   2 1163.87   27.21
  -2  10   2   12.15    1.36
   0  10  -2    2.07    0.79
   0  10   2    3.79    0.92
  -2  10  -2   37.68    2.11
  -6  10  -2  715.04   17.67
  -8  10  -2   35.75    2.42
 -10  10  -2  317.35    9.58
 -12  10  -2   18.22    1.95
 -14  10  -2    4.03    1.34
 -14  10  -2    2.95    1.08
 -16  10  -2    6.19    1.30
 -16  10  -2    8.40    1.70
 -18  10  -2   36.59    2.45
 -20  10  -2    7.50    1.24
  19  11  -2  126.35    6.24
 -19  11   2  118.21    4.13
 -17  11   2    8.51    1.43
  17  11  -2    4.94    2.26
 -17  11   2    6.37    1.58
 -15  11   2   16.00    2.11
 -15  11   2   16.05    1.74
  15  11  -2   14.02    3.02
 -13  11   2   67.15    3.65
  13  11  -2   66.68    4.93
  11  11  -2    6.48    2.35
 -11  11   2    3.32    1.35
  -9  11   2    1.29    0.96
   9  11  -2    1.24    1.69
   7  11  -2  585.30   15.71
  -7  11   2  586.17   15.15
   5  11  -2   53.43    3.29
  -5  11   2   54.78    2.89
  -3  11   2  423.06   11.21
   1  11  -2    5.41    1.13
  -1  11   2    5.10    1.13
  -1  11  -2   61.69    2.90
  -3  11  -2   21.51    1.85
  -3  11  -2   25.16    1.87
  -5  11  -2  555.22   14.30
  -7  11  -2  783.96   19.52
  -9  11  -2  169.97    6.13
 -13  11  -2  148.60    5.66
 -15  11  -2    5.10    1.49
 -15  11  -2    4.95    1.29
 -17  11  -2   10.51    1.90
 -17  11  -2   10.47    1.61
 -19  11  -2   73.09    3.19
 -20  12   2   35.15    2.12
  20  12  -2   40.55    3.40
  18  12  -2    3.69    2.03
 -18  12   2    3.98    1.20
 -16  12   2   16.93    1.88
  16  12  -2   12.50    2.67
 -16  12   2   12.13    1.95
  14  12  -2  131.96    6.60
 -14  12   2  123.58    4.33
 -14  12   2  126.25    5.25
  12  12  -2  115.59    5.94
 -12  12   2  117.37    4.88
 -10  12   2   68.47    3.72
  10  12  -2   76.78    4.91
   8  12  -2   22.94    3.06
  -8  12   2   22.44    2.10
  -6  12   2  327.06    9.55
   6  12  -2  329.02    9.97
  -4  12   2  591.51   15.07
   4  12  -2  576.71   14.97
  -2  12   2  172.69    5.79
  -2  12   2  180.27    5.57
   2  12  -2  169.86    5.75
   0  12  -2  437.08   11.61
   0  12  -2  425.32   11.22
   0  12   2  440.04   11.72
  -2  12  -2    6.26    1.21
  -2  12  -2    2.66    0.92
  -4  12  -2  135.52    4.85
  -4  12  -2  137.86    5.03
  -6  12  -2 1171.05   28.06
  -8  12  -2   26.63    2.30
 -12  12  -2   90.54    4.27
 -14  12  -2   11.08    1.88
 -14  12  -2   11.07    1.54
 -16  12  -2   90.82    4.37
 -16  12  -2   88.52    3.71
 -18  12  -2    9.78    1.53
  19  13  -2    8.66    2.16
 -19  13   2    8.54    1.34
  17  13  -2   17.92    2.89
 -17  13   2   22.61    2.04
 -17  13   2   18.95    2.33
 -15  13   2   76.69    4.06
 -15  13   2   80.36    3.44
  15  13  -2   78.99    5.13
 -13  13   2   58.10    2.94
  13  13  -2   61.90    4.53
 -13  13   2   60.11    3.56
  11  13  -2    0.21    1.46
 -11  13   2    1.08    0.94
   9  13  -2   37.17    3.56
  -9  13   2   37.43    2.83
   7  13  -2    3.44    1.47
  -7  13   2    2.82    1.17
   5  13  -2  471.12   12.80
  -5  13   2  458.68   12.70
   3  13  -2  179.76    6.20
  -3  13   2  187.85    5.96
  -3  13   2  182.96    6.24
   1  13  -2  395.68   10.47
  -1  13   2  370.37   10.66
  -1  13   2  379.43   10.12
  -1  13  -2   14.49    1.76
   1  13   2   11.95    1.67
  -3  13  -2  136.87    5.00
  -3  13  -2  141.29    5.21
  -5  13  -2   16.82    1.97
  -7  13  -2   84.33    4.11
 -11  13  -2   95.20    4.36
 -13  13  -2   13.42    1.60
 -13  13  -2   13.05    1.96
 -15  13  -2   20.82    2.41
 -15  13  -2   20.96    2.01
 -17  13  -2   57.88    3.43
 -17  13  -2   59.67    2.99
 -19  13  -2    2.71    1.01
 -18  14   2    0.74    0.96
  18  14  -2   -0.82    1.42
 -18  14   2   -0.46    1.04
 -16  14   2   62.39    3.70
  16  14  -2   63.62    4.61
 -16  14   2   63.46    3.10
 -14  14   2    5.78    1.62
 -14  14   2    5.68    1.32
  14  14  -2    5.97    2.18
  12  14  -2   61.02    4.37
 -12  14   2   67.58    3.08
 -12  14   2   61.25    3.67
  10  14  -2    2.64    1.59
 -10  14   2    2.32    1.11
  -8  14   2   11.57    1.97
   8  14  -2   14.94    2.47
   6  14  -2   55.34    3.50
  -6  14   2   52.18    3.19
  -4  14   2   46.41    3.01
   4  14  -2   48.01    3.17
  -2  14   2   43.92    2.91
  -2  14   2   46.64    2.81
   0  14  -2  376.93   10.81
   0  14  -2  398.59   10.55
   0  14   2  357.74   10.12
  -2  14  -2    6.45    1.42
  -2  14  -2    6.66    1.39
  -4  14  -2  252.93    8.17
  -4  14  -2  259.68    7.90
  -6  14  -2   51.36    3.30
 -10  14  -2    8.55    1.65
 -12  14  -2   11.79    1.58
 -12  14  -2   13.57    1.98
 -14  14  -2   18.74    2.29
 -14  14  -2   18.61    1.91
 -16  14  -2   14.95    1.73
 -16  14  -2   13.88    2.00
 -18  14  -2   43.01    2.48
  17  15  -2   61.89    4.17
 -17  15   2   54.42    3.36
 -17  15   2   50.32    2.71
 -15  15   2    6.73    1.76
  15  15  -2    6.76    2.17
 -15  15   2    7.69    1.40
 -13  15   2  683.17   14.23
  13  15  -2  688.71   18.32
 -13  15   2  702.30   17.34
  11  15  -2   25.11    3.01
 -11  15   2   25.50    2.52
   9  15  -2   44.53    3.48
  -9  15   2   57.61    3.32
   7  15  -2    3.83    1.60
  -5  15   2    2.77    1.24
   5  15  -2    2.41    1.35
   3  15  -2   14.10    1.96
   1  15  -2 2104.73   47.56
  -1  15   2 2179.61   49.81
  -1  15   2 2148.89   47.31
  -1  15  -2  195.39    6.65
  -1  15  -2  198.76    6.99
  -3  15  -2  847.17   21.69
  -3  15  -2  865.00   20.80
  -5  15  -2  126.40    5.36
  -7  15  -2    1.33    2.90
 -11  15  -2  209.54    6.03
 -11  15  -2  212.65    7.26
 -13  15  -2   51.96    2.87
 -13  15  -2   47.04    3.28
 -15  15  -2  103.72    3.98
 -15  15  -2  101.94    4.69
 -17  15  -2   15.38    1.68
 -17  15  -2   16.48    2.08
 -18  16   2   18.24    1.68
 -16  16   2    2.15    1.35
 -16  16   2    1.93    1.00
  16  16  -2    1.30    1.66
 -14  16   2  228.60    6.32
 -14  16   2  228.52    7.77
  14  16  -2  229.93    8.49
 -12  16   2  309.82    9.53
  12  16  -2  310.33   10.28
  10  16  -2    1.55    1.39
 -10  16   2    3.02    1.28
  -8  16   2   23.81    2.31
   8  16  -2   16.41    2.31
   4  16  -2   57.05    3.56
  -4  16   2   44.41    3.26
  -2  16   2 1167.63   28.81
  -2  16   2 1159.36   27.15
   2  16  -2 1166.85   27.51
   0  16  -2  908.61   22.08
  -2  16  -2    9.46    1.69
  -2  16  -2   14.04    2.12
  -4  16  -2  774.47   20.32
 -10  16  -2  161.38    5.07
 -10  16  -2  163.67    6.17
 -12  16  -2   68.22    3.92
 -12  16  -2   58.05    3.06
 -14  16  -2   13.19    2.13
 -14  16  -2   14.21    1.71
 -16  16  -2  123.88    4.26
 -16  16  -2  114.98    4.91
  17  17  -2    0.70    1.26
 -17  17   2    1.18    0.88
 -17  17   2    0.27    1.04
 -15  17   2    9.71    1.89
 -15  17   2    9.40    1.42
  15  17  -2    8.89    2.10
 -13  17   2    3.21    1.46
  13  17  -2    4.48    1.78
  11  17  -2   -1.28    1.30
 -11  17   2    0.17    1.15
  -9  17   2   20.89    2.34
   9  17  -2   21.08    2.61
  -7  17   2    7.63    1.57
  -7  17   2    0.60    3.04
   7  17  -2    5.27    1.61
   5  17  -2    1.09    1.12
  -5  17   2   -2.04    2.38
   5  17  -2    1.20    1.29
  -5  17   2    1.10    0.97
  -1  17  -2   -0.17    3.15
  -1  17  -2    9.82    1.77
  -7  17  -2   78.49    4.01
   7  17   2   82.04    4.28
 -11  17  -2    3.51    1.43
 -11  17  -2    1.40    1.15
 -13  17  -2   20.67    2.47
 -13  17  -2   24.28    2.16
 -15  17  -2   -0.15    1.12
 -15  17  -2    0.28    0.95
 -17  17  -2    3.63    1.28
 -17  17  -2    3.38    1.03
 -16  18   2    0.72    0.88
  16  18  -2    1.83    1.39
 -16  18   2    1.20    1.13
 -14  18   2  185.79    6.69
  14  18  -2  183.53    7.04
  12  18  -2  192.12    7.33
 -12  18   2  193.71    6.99
  10  18  -2   84.26    4.64
 -10  18   2   84.41    4.35
  -8  18   2   31.47    2.70
   8  18  -2   31.79    2.94
  -6  18   2    1.33    0.99
   6  18  -2    2.85    1.32
  -6  18   2   -1.37    2.80
   4  18  -2   42.23    3.10
   4  18  -2   39.72    3.20
  -4  18   2   41.62    2.91
   2  18  -2    3.60    1.33
  -2  18   2   -0.34    3.08
   2  18  -2   -0.16    3.33
  -2  18   2    2.27    1.15
   2  18  -2    2.58    1.34
  -2  18  -2    1.98    1.16
   2  18   2   -0.62    2.92
  -2  18  -2   -1.01    2.99
  -2  18  -2    1.19    1.22
   2  18   2    1.20    1.10
  -4  18  -2  250.12    8.02
   4  18   2  253.36    8.13
   6  18   2   22.10    2.58
  -6  18  -2   20.85    2.32
 -12  18  -2   83.92    4.33
 -12  18  -2   78.95    3.47
 -14  18  -2   10.97    1.52
 -14  18  -2   12.54    2.04
 -16  18  -2   66.48    3.44
 -15  19   2   53.49    3.22
  15  19  -2   54.84    3.50
 -13  19   2  298.84    9.21
  13  19  -2  303.28    9.57
 -11  19   2    9.35    1.92
  11  19  -2    8.90    2.00
  -9  19   2   47.89    3.32
   9  19  -2   49.41    3.56
   7  19  -2   23.60    2.65
  -7  19   2   23.91    2.47
  -5  19   2   16.76    2.09
   5  19  -2   13.31    2.11
   3  19  -2   95.22    4.60
  -3  19   2   92.76    4.40
   3  19  -2   97.35    4.85
   3  19   2    2.49    1.25
  -3  19  -2    1.67    3.57
  -3  19  -2    1.13    1.08
   5  19   2   48.56    3.37
  -5  19  -2   50.24    3.25
  -7  19  -2    0.63    3.31
  -7  19  -2    0.38    1.14
   7  19   2    0.80    1.20
  -9  19  -2    2.02    1.28
  -9  19  -2    0.56    3.35
 -11  19  -2   43.06    3.22
 -13  19  -2  101.43    3.76
 -13  19  -2   95.09    4.54
 -15  19  -2    0.11    1.05
 -15  19  -2    1.74    0.93
  14  20  -2    8.10    1.83
 -14  20   2    9.49    1.71
  12  20  -2   29.72    2.96
 -12  20   2   27.80    2.75
 -10  20   2   -1.41    3.26
 -10  20   2    5.00    1.67
  10  20  -2    5.22    1.80
  -8  20   2   15.89    2.19
   8  20  -2   17.24    2.39
   6  20  -2   11.64    2.12
  -6  20   2   11.22    1.93
   4  20  -2    9.18    1.88
  -4  20   2   11.71    1.89
  -2  20   2   -0.76    3.29
  -2  20   2    1.88    1.15
   2  20  -2    0.54    1.16
   2  20  -2    1.28    1.38
   4  20   2  102.22    4.80
  -4  20  -2   98.29    4.67
   6  20   2   64.31    3.89
  -6  20  -2   69.47    3.92
  -8  20  -2   -0.22    1.14
  -8  20  -2    0.94    3.28
 -10  20  -2    5.07    1.60
 -10  20  -2    0.01    3.23
 -12  20  -2   10.10    1.88
 -14  20  -2   12.85    1.85
  13  21  -2    8.73    1.82
 -13  21   2    7.78    1.63
 -11  21   2   78.54    4.10
  11  21  -2   78.61    4.31
  -9  21   2   48.95    3.35
   9  21  -2   48.29    3.50
   7  21  -2   21.59    2.54
  -7  21   2   20.57    2.41
  -5  21   2   15.01    2.10
   5  21  -2   13.80    2.13
   3  21  -2    0.25    1.16
  -3  21   2   -2.94    3.23
  -3  21   2   -0.39    0.93
  -3  21  -2  429.92   12.07
   3  21   2  428.73   12.02
   5  21   2   11.32    1.99
  -5  21  -2    6.90    1.64
  -7  21  -2    0.22    1.11
  -7  21  -2    0.36    3.40
  -9  21  -2   -0.62    3.12
  -9  21  -2    0.60    1.19
 -11  21  -2    9.31    1.79
 -13  21  -2   22.95    2.27
  12  22  -2    5.28    1.58
 -12  22   2    4.77    1.46
  10  22  -2   98.36    4.72
 -10  22   2   94.69    4.51
  -8  22   2   46.65    3.32
   8  22  -2   51.35    3.56
  -6  22   2  147.69    5.95
   6  22  -2  148.89    6.09
  -4  22   2    1.32    1.16
  -4  22   2    0.66    3.34
   4  22  -2    2.12    1.31
   2  22  -2   18.11    2.33
  -2  22   2   18.81    2.21
   0  22   2   -1.06    3.48
   0  22   2   12.49    1.98
   0  22  -2   -0.74    3.40
   0  22  -2    6.24    1.60
   2  22   2    1.34    1.17
  -2  22  -2    0.24    3.60
   2  22   2   -1.66    3.24
  -2  22  -2    1.88    1.23
  -4  22  -2    2.81    1.37
   4  22   2    3.73    1.45
  -4  22  -2    0.38    3.48
  -8  22  -2    3.02    1.44
  -8  22  -2   -1.97    3.04
 -12  22  -2   28.37    2.41
  11  23  -2   56.11    3.35
 -11  23   2   55.52    3.24
   9  23  -2   39.58    3.07
  -9  23   2   39.42    2.98
   7  23  -2  322.37    9.74
  -7  23   2  321.08    9.69
  -5  23   2   79.54    4.18
   5  23  -2   78.87    4.29
  -3  23   2  173.92    6.43
   3  23  -2  167.25    6.51
   3  23   2   30.38    2.75
  -3  23  -2   31.71    2.83
   8  24  -2  227.54    7.49
  -8  24   2  228.05    7.45
   6  24  -2  148.04    5.82
  -6  24   2  143.53    5.71
   4  24  -2   -0.26    1.10
  -4  24   2   -0.60    1.07
  -4  24   2   -0.61    3.34
  -2  24   2   38.70    2.96
   2  24  -2   36.31    2.97
  -2  24  -2   24.24    2.50
   2  24   2   26.42    2.49
  -8  24  -2    8.76    1.70
  -8  24  -2    1.31    3.43
  -7  25   2    1.71    1.15
   7  25  -2    2.16    1.23
  -7  25   2   -0.23    3.22
   5  25  -2   26.64    2.49
  -5  25   2   21.32    2.36
  -3  25   2   10.97    1.88
   3  25  -2   14.90    2.07
   1  25  -2   14.96    2.11
  -1  25   2   11.71    1.90
  -5  25  -2   -0.46    3.29
  -5  25  -2    0.61    1.15
  -7  25  -2    2.84    1.21
  -7  25  -2    1.07    3.28
   4  26  -2   23.19    2.27
  -4  26   2   19.60    2.19
  -2  26   2    3.33    1.28
  -2  26   2   -0.62    3.15
   2  26  -2    2.46    1.26
   0  26  -2   11.34    1.78
   0  26  -2   -1.47    3.14
   0  26   2   -0.16    3.27
  -2  26  -2    0.93    3.40
  -2  26  -2   10.19    1.70
  -4  26  -2    1.47    1.15
  -4  26  -2   -0.87    2.92
 -22   0   3    0.87    0.67
 -20   0   3   -1.48    0.66
 -18   0   3   -0.73    0.74
  18   0  -3   -0.07    2.77
  16   0  -3   -0.28    2.13
 -14   0   3   33.89    2.85
  14   0  -3   33.24    4.02
 -10   0   3    0.43    0.82
  10   0  -3    0.53    1.23
  -8   0   3    0.68    0.65
   6   0  -3    0.59    0.53
  -6   0   3    1.26    0.54
  -6   0   3    0.90    0.63
  -4   0   3    0.26    0.45
  -2   0   3    2.70    0.37
   2   0  -3    2.08    0.40
   0   0  -3    1.33    0.29
  -6   0  -3    0.32    0.69
  -8   0  -3    1.05    0.77
 -10   0  -3    0.24    0.83
 -10   0  -3   -0.08    0.45
 -12   0  -3   -0.56    0.48
 -12   0  -3   -0.23    0.93
 -14   0  -3   -0.31    0.59
 -16   0  -3    0.96    0.83
 -18   0  -3    1.33    0.90
 -20   0  -3    1.30    0.84
 -22   0  -3    0.78    0.66
 -21  -1   3    7.12    1.05
 -21   1   3    6.10    1.00
 -19   1   3    4.44    0.91
 -19  -1   3    4.92    0.95
  19  -1  -3    4.92    2.88
 -19   1   3    6.14    1.12
  19   1  -3    5.05    3.10
  17   1  -3   14.24    3.59
  17  -1  -3   15.45    3.52
 -17   1   3   15.86    1.63
  15  -1  -3  113.03    6.50
  15   1  -3  122.91    6.99
  13  -1  -3  721.58   19.26
 -13   1   3  696.64   17.86
  13   1  -3  672.88   19.34
 -13  -1   3  697.51   18.00
 -11  -1   3   18.77    1.95
  11  -1  -3   20.63    2.85
 -11   1   3   19.01    2.01
 -11  -1   3   18.99    1.33
  11   1  -3   20.36    2.73
 -11   1   3   19.25    1.44
  -9  -1   3    5.25    1.17
  -9   1   3    5.18    1.05
  -7   1   3   16.43    1.27
  -7  -1   3   16.32    1.43
  -5  -1   3 1207.27   27.11
  -5   1   3 1229.10   26.95
   5   1  -3 1192.61   32.65
  -5  -1   3 1154.89   32.53
   5  -1  -3 1207.19   32.51
   3   1  -3  276.75    8.22
   3  -1  -3  280.63    8.01
  -1  -1   3  692.60   19.21
   1   1  -3  709.80   19.30
   1  -1   3  141.39    4.36
  -1   1  -3  141.43    4.42
  -3   1  -3    3.53    0.49
  -3   1  -3    2.70    0.54
  -5  -1  -3   50.10    1.98
  -5   1  -3   46.79    2.10
  -7   1  -3  228.07    6.49
  -7  -1  -3  218.41    6.64
  -9  -1  -3  170.96    5.84
  -9   1  -3  178.62    5.74
 -11   1  -3  154.31    5.59
 -11  -1  -3  150.85    3.76
 -11  -1  -3  149.83    5.65
 -11   1  -3  150.15    3.81
 -13  -1  -3   13.48    1.24
 -13   1  -3   12.69    1.85
 -13   1  -3   14.49    1.37
 -13  -1  -3   16.59    2.17
 -15  -1  -3  221.11    5.43
 -15   1  -3  223.60    5.52
 -17   1  -3    1.38    0.88
 -17   1  -3    1.47    0.93
 -17  -1  -3   -0.73    0.82
 -19  -1  -3   92.96    3.13
 -19   1  -3   96.63    3.15
 -21   1  -3    0.22    0.69
 -21  -1  -3    1.02    0.76
 -22   2   3   13.80    1.22
 -22  -2   3   13.63    1.24
 -20  -2   3    3.59    0.91
 -20   2   3    5.82    1.12
 -20   2   3    5.00    0.94
 -18  -2   3    1.51    0.87
 -18   2   3    0.90    0.90
 -18   2   3    0.86    0.81
  18   2  -3    2.99    3.12
  18  -2  -3    0.89    2.61
  16  -2  -3    3.03    2.26
  16   2  -3    7.36    3.05
 -14   2   3 1063.65   26.03
 -14  -2   3 1085.29   26.26
  14  -2  -3 1083.59   27.16
  14   2  -3  990.56   27.55
 -12   2   3 1301.68   30.42
 -12  -2   3 1295.21   30.61
  12   2  -3 1236.66   31.42
 -12   2   3 1299.13   21.50
 -10  -2   3  476.41   12.73
  10   2  -3  492.62   13.89
 -10   2   3  490.29   12.50
  -8  -2   3  177.04    5.58
  -8   2   3  184.47    5.36
   6   2  -3  210.10    6.64
   6  -2  -3  204.28    6.24
  -6   2   3  207.71    5.56
   4  -2  -3 4218.79  113.71
  -4   2   3 3900.03   92.05
   4   2  -3 4515.62  115.46
  -2  -2   3  405.06   11.64
   2   2  -3  407.25   11.68
   0  -2   3 4194.57  113.22
   0   2  -3 4275.42  115.49
   2  -2   3 3294.80   90.81
  -2   2  -3 3422.60   91.77
  -4   2  -3 1347.64   30.43
  -4   2  -3 1362.63   37.19
  -6   2  -3  423.80   10.68
  -8   2  -3  298.51    8.28
 -10   2  -3    4.58    0.78
 -10   2  -3    1.39    0.87
 -10  -2  -3    3.10    1.19
 -12   2  -3  333.92   10.06
 -12  -2  -3  349.13   10.46
 -12   2  -3  350.78    7.13
 -12  -2  -3  341.31    6.95
 -14  -2  -3    3.74    0.83
 -14   2  -3    3.40    0.83
 -16  -2  -3  156.73    4.44
 -16   2  -3  163.24    4.59
 -18   2  -3  176.03    4.42
 -18  -2  -3  178.97    4.47
 -20   2  -3  188.80    4.45
 -20  -2  -3  188.16    4.48
 -22   2  -3   11.91    1.07
 -22  -2  -3   13.14    1.19
 -21  -3   3   95.87    2.84
 -21   3   3   97.84    2.83
 -21   3   3   93.25    3.28
 -19   3   3   33.67    2.19
  19  -3  -3   35.91    4.68
 -19  -3   3   36.08    1.90
 -19   3   3   34.86    1.82
  17  -3  -3  210.99    9.46
 -17   3   3  197.59    5.46
  17   3  -3  192.06    9.90
  15   3  -3   38.10    4.61
  15  -3  -3   39.50    3.97
 -13   3   3  499.80   13.47
 -13  -3   3  506.45   13.73
  13   3  -3  477.20   15.40
 -11  -3   3  214.75    7.11
 -11   3   3  230.49    4.91
  11   3  -3  211.78    8.48
 -11   3   3  229.09    6.92
  -9   3   3   10.01    1.21
  -7   3   3    1.50    0.61
   7   3  -3    1.64    0.70
  -5   3   3  845.05   19.63
   5   3  -3  871.60   24.01
   5  -3  -3  866.86   23.51
  -3   3   3 1211.27   27.68
   3   3  -3 1280.23   34.07
   1   3  -3   94.01    3.43
  -1  -3   3   95.13    3.44
  -1   3  -3  112.65    3.74
   1  -3   3  109.45    3.72
   3  -3   3  236.42    6.93
  -3   3  -3  245.35    6.98
  -3   3  -3  235.56    5.99
  -5   3  -3  100.70    3.28
  -7   3  -3  252.34    7.03
  -9   3  -3  221.24    6.73
 -11   3  -3    2.28    0.66
 -11  -3  -3    2.57    1.19
 -11   3  -3    4.35    1.14
 -11  -3  -3    3.36    0.70
 -13   3  -3    4.64    1.46
 -13  -3  -3    6.15    1.73
 -13   3  -3    5.91    0.99
 -13  -3  -3    4.61    0.88
 -15   3  -3    3.85    0.91
 -15  -3  -3    4.26    0.90
 -17  -3  -3   56.47    2.42
 -17   3  -3   55.29    2.40
 -17   3  -3   60.70    2.72
 -19  -3  -3   61.73    2.57
 -19   3  -3   62.47    2.56
 -21  -3  -3    1.25    0.71
 -21   3  -3   -0.47    0.63
 -22   4   3   37.71    1.96
 -22  -4   3   38.92    1.69
 -22   4   3   38.28    1.63
 -20   4   3   15.67    1.69
 -20   4   3   11.60    1.16
 -20  -4   3   17.12    1.44
  18   4  -3  234.92   11.24
  18  -4  -3  233.29   10.45
 -18   4   3  244.96    6.33
 -18  -4   3  257.99    5.26
 -18   4   3  237.85    5.08
  16  -4  -3  220.97    9.23
  16   4  -3  188.20    9.69
  14   4  -3   72.59    5.65
 -14   4   3   76.52    3.94
 -14  -4   3   71.25    4.05
 -12  -4   3   16.31    2.02
 -12   4   3   16.44    1.28
  12   4  -3   15.81    2.91
 -12   4   3   13.22    1.79
  10   4  -3  232.03    8.88
 -10   4   3  247.20    5.14
 -10   4   3  254.34    7.32
 -10  -4   3  256.76    7.86
  -6   4   3  110.79    3.54
   6   4  -3  109.83    4.35
   4   4  -3   17.61    1.49
  -4   4   3   17.91    1.20
  -2   4   3    6.51    0.81
   2   4  -3    8.36    1.19
   0   4   3  239.14    6.04
   0   4  -3  236.58    7.45
  -2   4  -3  314.00    9.07
  -2   4  -3  309.22    7.47
   2  -4   3  304.69    9.11
  -4   4  -3  135.40    4.01
   4  -4   3  131.62    4.33
  -4   4  -3  152.59    4.36
  -6   4  -3  154.96    4.73
  -8   4  -3   50.92    2.54
 -10   4  -3    4.76    1.30
 -10   4  -3    5.49    0.84
 -12  -4  -3   99.22    2.94
 -12   4  -3  101.72    4.52
 -12  -4  -3  106.58    5.03
 -12   4  -3  105.34    3.20
 -14  -4  -3    0.91    0.61
 -14   4  -3    1.07    0.64
 -16   4  -3   45.09    2.30
 -16   4  -3   39.75    2.37
 -18   4  -3   10.87    1.28
 -18  -4  -3    8.08    1.21
 -20  -4  -3   14.31    1.30
 -20   4  -3   14.34    1.27
 -21   5   3    0.58    0.66
 -21  -5   3    2.16    0.75
 -21   5   3    1.55    0.89
 -19   5   3  222.92    4.76
  19  -5  -3  211.10   10.00
 -19   5   3  226.36    5.98
 -19  -5   3  217.44    4.78
 -17   5   3    4.98    1.24
 -17  -5   3    5.58    0.98
  17   5  -3    8.28    3.50
 -17   5   3    5.70    0.95
  17  -5  -3    3.34    2.32
  15   5  -3    8.84    3.18
 -15   5   3    8.05    1.47
 -13   5   3   11.69    1.75
  13   5  -3   10.43    3.15
 -13  -5   3   11.37    2.03
  11   5  -3   80.75    5.38
 -11   5   3   88.85    3.73
 -11   5   3   85.67    2.61
 -11  -5   3   91.13    4.27
   9   5  -3   20.77    2.96
  -9   5   3   26.87    1.93
   7   5  -3 1731.09   47.46
  -7   5   3 1739.59   39.15
  -5   5   3   16.84    1.27
   5   5  -3   18.53    1.67
  -3   5   3  793.56   18.29
   3   5  -3  806.64   22.64
   1   5  -3 1821.10   50.46
  -1   5   3 1887.54   41.36
   1   5  -3 1886.27   41.40
  -1   5  -3  122.45    3.43
  -1   5  -3  125.94    4.39
  -3   5  -3  356.47   10.18
  -3   5  -3  342.93    8.54
  -5   5  -3  677.78   16.02
  -7   5  -3  357.48    9.41
  -9   5  -3  307.59    8.72
 -11   5  -3  140.62    3.64
 -11   5  -3  133.23    5.12
 -13   5  -3  385.83   11.43
 -13  -5  -3  384.48   11.99
 -13   5  -3  397.89    8.06
 -15   5  -3    0.68    1.02
 -15   5  -3    1.93    0.82
 -17   5  -3   15.97    1.73
 -17   5  -3   10.72    1.30
 -17   5  -3   10.74    1.41
 -17  -5  -3   11.02    1.30
 -19   5  -3    3.86    1.13
 -19   5  -3    3.32    0.95
 -19  -5  -3    3.30    0.97
 -21  -5  -3    0.04    0.63
 -21   5  -3    0.17    0.66
 -22   6   3    1.11    0.73
  22   6  -3    0.39    1.71
 -22  -6   3    0.69    0.55
 -20  -6   3  191.73    4.29
 -20   6   3  194.15    5.35
 -18   6   3   72.73    3.19
  18  -6  -3   66.63    5.51
 -18  -6   3   72.41    2.50
 -16   6   3   52.35    2.69
  16  -6  -3   52.52    4.66
  16   6  -3   51.31    5.71
  14   6  -3   45.80    4.96
  12   6  -3   18.69    3.35
 -12  -6   3   23.14    2.59
 -12   6   3   18.12    1.99
 -10   6   3    8.64    0.90
 -10   6   3    8.40    1.36
  10   6  -3   11.20    2.62
  -8   6   3 2150.84   48.43
  -6   6   3  280.86    7.34
   6   6  -3  271.07    9.08
   4   6  -3  559.32   16.66
  -4   6   3  569.91   13.43
   2   6  -3   66.16    3.15
  -2   6   3   71.68    2.48
   0   6   3  302.90    7.57
   0   6  -3  304.79    9.30
   0   6  -3  284.41    7.35
  -2   6  -3  110.29    3.36
  -2   6  -3  115.19    4.12
  -4   6  -3 1206.69   27.44
  -6   6  -3 1283.65   29.46
  -8   6  -3   91.15    3.64
  -8   6  -3   87.90    2.75
 -10   6  -3   10.90    1.02
 -10   6  -3   10.48    1.49
 -12   6  -3  610.99   16.50
 -12   6  -3  640.41   11.70
 -12  -6  -3  639.59   17.59
 -14   6  -3  165.22    4.49
 -14   6  -3  164.97    5.74
 -16   6  -3   17.59    1.79
 -16   6  -3   15.05    1.52
 -18  -6  -3   14.13    1.34
 -18   6  -3   12.30    1.54
 -20   6  -3    1.75    0.95
 -20  -6  -3    0.99    0.74
 -21  -7   3   41.24    1.71
 -21   7   3   41.49    2.21
  21   7  -3   45.63    4.21
 -19   7   3   53.25    2.83
 -19  -7   3   52.32    2.13
 -17   7   3   44.53    2.59
 -17  -7   3   38.81    1.92
  17  -7  -3   41.02    4.50
 -15   7   3    7.44    1.52
  15   7  -3    4.69    3.03
 -13   7   3   29.72    2.52
  13   7  -3   25.03    3.86
  11   7  -3    0.91    1.96
 -11   7   3    2.12    0.67
 -11   7   3    0.02    0.80
   9   7  -3  680.03   19.05
  -9   7   3  731.21   17.46
  -7   7   3  883.09   20.78
   7   7  -3  875.66   25.44
   5   7  -3   13.41    1.53
  -5   7   3   11.15    1.15
  -3   7   3   86.25    3.06
   3   7  -3   84.62    3.98
   1   7  -3   46.31    2.04
  -1   7   3   45.60    2.00
   1   7  -3   45.84    2.55
  -1   7  -3   33.62    2.05
  -1   7  -3   31.60    1.58
  -3   7  -3  437.36   10.87
  -3   7  -3  449.29   13.07
  -5   7  -3  464.34   11.57
  -7   7  -3  260.33    5.85
  -7   7  -3  264.33    7.49
  -9   7  -3  139.60    3.45
  -9   7  -3  132.73    4.89
 -11   7  -3    7.78    1.56
 -11   7  -3    1.88    0.69
 -13   7  -3  106.42    3.37
 -15   7  -3    8.87    1.33
 -15   7  -3    8.50    1.20
 -15   7  -3    8.62    1.61
  17  -7   3    2.89    2.25
 -17   7  -3    3.87    1.10
 -17  -7  -3    3.65    0.93
 -19   7  -3    0.39    0.92
 -19  -7  -3   -0.75    0.67
 -21   7  -3    3.77    0.95
 -21  -7  -3    3.21    0.71
 -20  -8   3   26.94    1.55
  20   8  -3   34.91    4.05
 -20   8   3   28.63    2.14
 -18   8   3    2.15    1.01
  18  -8  -3    1.42    2.13
 -16   8   3   47.48    3.10
 -16   8   3   49.07    2.71
 -14   8   3   34.08    2.57
  14   8  -3   35.21    4.67
 -12   8   3   17.65    1.98
  12   8  -3   26.53    3.72
  10   8  -3  277.85   10.12
 -10   8   3  282.46    8.35
 -10   8   3  291.17    5.85
   8   8  -3   52.74    4.15
  -8   8   3   43.34    2.51
  -6   8   3  652.37   15.54
   6   8  -3  617.70   19.08
   4   8  -3   79.90    3.97
  -4   8   3   89.42    3.17
  -2   8   3    5.71    0.91
   0   8  -3   51.03    2.79
   0   8  -3   51.79    2.20
   0   8   3   53.70    2.32
  -2   8  -3  160.25    4.69
  -2   8  -3  157.35    5.71
  -6   8  -3 1030.79   18.94
  -6   8  -3 1010.32   23.95
  -8   8  -3    4.73    1.21
 -10   8  -3  115.60    3.16
 -10   8  -3  109.01    4.54
 -12   8  -3    6.28    1.53
 -12   8  -3    8.83    1.09
 -14   8  -3   72.23    2.80
 -14   8  -3   69.62    3.62
 -16   8  -3    0.90    0.95
 -16   8  -3    1.89    0.94
 -16   8  -3    1.93    1.26
 -18  -8  -3   10.54    1.22
 -18   8  -3   13.85    1.64
 -20   8  -3    7.17    1.25
 -20  -8  -3    5.95    0.89
  21   9  -3   19.32    2.82
 -21   9   3   16.26    1.56
  19   9  -3  155.00    7.56
 -19   9   3  162.31    4.92
 -17   9   3    3.43    1.10
 -17   9   3    2.85    1.36
  17   9  -3    3.63    2.30
 -15   9   3    9.40    1.42
 -15   9   3    8.49    1.63
 -13   9   3    9.38    1.52
  13   9  -3    8.52    2.78
  11   9  -3    6.38    2.31
 -11   9   3    4.71    1.28
   9   9  -3  320.83   10.69
  -9   9   3  321.43    9.18
  -7   9   3 2420.03   53.21
   7   9  -3 2287.84   52.59
  -5   9   3    1.26    0.81
  -3   9   3  387.30    9.58
   3   9  -3  338.67   11.74
   1   9  -3    7.73    1.07
  -1   9   3    6.17    1.00
   1   9  -3    9.08    1.41
  -1   9  -3    2.77    0.75
  -1   9  -3    2.43    0.91
  -3   9  -3  822.76   19.48
  -5   9  -3  552.94   13.83
  -7   9  -3    5.85    1.26
  -9   9  -3 1060.77   25.58
 -11   9  -3    8.67    1.62
 -11   9  -3    9.31    1.07
 -13   9  -3  424.09   11.30
 -13   9  -3  420.68    8.64
 -15   9  -3   81.21    3.43
 -15   9  -3   81.93    3.10
 -15   9  -3   83.84    4.05
 -17   9  -3   21.63    2.01
 -19   9  -3    8.41    1.39
 -20  10   3  112.81    3.87
  20  10  -3  119.10    5.97
 -18  10   3   25.48    2.21
  18  10  -3   24.62    3.63
  16  10  -3   15.43    3.31
 -16  10   3   14.21    1.64
 -16  10   3   15.58    2.11
 -14  10   3   69.96    3.66
  14  10  -3   66.82    5.13
  12  10  -3   12.27    2.88
 -10  10   3    3.91    1.18
  10  10  -3    2.41    1.76
  -8  10   3  583.40   14.87
   8  10  -3  568.96   15.89
   6  10  -3  676.71   17.63
  -6  10   3  706.63   17.16
  -4  10   3  471.60   12.13
  -2  10   3  169.36    5.36
   0  10  -3  380.61    9.97
   0  10   3  383.00   10.11
  -2  10  -3  915.62   21.65
  -4  10  -3  109.59    4.03
  -4  10  -3  111.60    4.02
  -6  10  -3  393.39   10.66
  -8  10  -3  222.08    7.10
 -10  10  -3  356.41   10.50
 -12  10  -3  335.57    9.47
 -14  10  -3  317.71    9.32
 -14  10  -3  324.05    7.93
 -16  10  -3    0.18    0.92
 -16  10  -3    1.04    1.16
 -18  10  -3    7.55    1.43
 -20  10  -3   -0.02    0.78
 -19  11   3    4.99    1.22
  19  11  -3    7.55    2.37
 -17  11   3   98.63    4.57
  17  11  -3  105.36    6.11
 -17  11   3  102.61    3.89
  15  11  -3   35.64    4.12
 -15  11   3   29.23    2.61
 -15  11   3   31.32    2.26
 -13  11   3   30.96    2.62
  13  11  -3   33.07    3.91
  11  11  -3   28.18    3.78
 -11  11   3   25.26    2.36
   9  11  -3    8.90    2.28
  -9  11   3    8.40    1.49
   7  11  -3  103.19    4.96
  -7  11   3   97.32    4.09
   5  11  -3  642.69   16.53
  -5  11   3  652.50   16.31
   3  11  -3   49.90    2.97
  -3  11   3   48.95    2.70
  -1  11   3    4.88    1.09
   1  11  -3    5.42    1.11
  -1  11  -3  544.59   13.75
  -3  11  -3   85.10    3.48
  -3  11  -3   80.78    3.42
  -5  11  -3   45.03    2.70
  -7  11  -3   45.67    2.71
  -9  11  -3   10.20    1.68
 -13  11  -3   85.30    3.51
 -13  11  -3   85.73    4.17
 -15  11  -3    1.48    1.19
 -15  11  -3    0.88    1.00
 -17  11  -3   29.60    2.62
 -17  11  -3   26.91    2.27
 -19  11  -3    5.72    1.25
  20  12  -3   44.36    3.53
 -20  12   3   40.16    2.26
 -18  12   3    5.61    1.25
  18  12  -3    5.76    2.23
 -16  12   3   95.17    3.80
  16  12  -3   99.55    5.76
 -14  12   3    6.59    1.60
 -14  12   3    6.90    1.35
  14  12  -3    7.29    2.42
  12  12  -3  109.77    5.80
 -12  12   3  118.78    4.94
  12  12  -3  132.23    6.79
  10  12  -3    2.20    1.89
 -10  12   3    0.53    1.03
  -8  12   3   39.30    2.70
   8  12  -3   38.74    3.64
  -6  12   3    2.99    1.16
   6  12  -3    4.28    1.51
  -4  12   3  634.65   16.11
   4  12  -3  630.90   16.09
  -2  12   3   42.42    2.54
  -2  12   3   41.40    2.33
   2  12  -3   48.21    2.80
   0  12   3    5.49    1.26
  -2  12  -3   43.77    2.53
  -2  12  -3   46.15    2.60
  -4  12  -3   53.10    2.87
  -4  12  -3   54.61    2.83
  -6  12  -3  290.43    8.74
  -8  12  -3   18.43    2.02
 -12  12  -3    2.60    1.25
 -14  12  -3    1.00    1.15
 -14  12  -3    0.64    0.93
 -16  12  -3    9.30    1.81
 -16  12  -3    9.94    1.55
 -18  12  -3   65.98    3.09
 -19  13   3   46.95    2.49
  19  13  -3   49.28    3.80
 -17  13   3   38.42    2.48
 -17  13   3   33.05    2.82
  17  13  -3   39.15    3.86
 -15  13   3    1.43    0.94
 -15  13   3    0.01    1.09
  15  13  -3    2.18    1.99
  13  13  -3  466.70   14.12
 -13  13   3  480.56   12.78
 -13  13   3  478.87   10.55
  11  13  -3   36.95    3.58
 -11  13   3   43.80    2.90
  11  13  -3   44.95    4.24
  -9  13   3  247.73    8.45
   9  13  -3  274.24    9.49
   7  13  -3  455.56   12.98
  -7  13   3  436.47   12.46
  -5  13   3  273.13    8.44
   5  13  -3  272.91    8.69
  -3  13   3  140.89    5.27
   3  13  -3  144.87    5.43
  -1  13   3 1119.22   24.86
   1  13  -3 1073.16   25.18
  -1  13   3 1064.15   26.12
  -1  13  -3    1.38    0.99
  -1  13  -3    4.74    1.15
  -3  13  -3  430.27   11.80
  -3  13  -3  432.40   11.45
  -5  13  -3   27.67    2.33
  -7  13  -3  455.27   12.82
 -11  13  -3   13.89    1.92
 -13  13  -3    6.34    1.58
 -13  13  -3    6.68    1.34
 -15  13  -3   96.97    4.52
 -15  13  -3   95.32    3.80
 -17  13  -3    0.30    0.96
 -17  13  -3    0.06    1.07
 -19  13  -3  103.23    3.62
  18  14  -3    1.45    1.65
 -18  14   3    1.04    1.00
  16  14  -3    2.30    1.86
 -16  14   3    3.53    1.17
 -16  14   3    1.27    1.33
  14  14  -3  402.05   12.52
 -14  14   3  388.82   11.18
 -14  14   3  394.79    9.29
 -12  14   3  209.81    5.85
 -12  14   3  217.11    7.29
  12  14  -3  207.25    8.18
  10  14  -3   26.06    3.04
  10  14  -3   25.64    3.31
 -10  14   3   32.14    2.56
   8  14  -3  129.81    5.99
  -8  14   3  119.19    5.27
  -6  14   3   26.30    2.33
   6  14  -3   26.70    2.64
  -4  14   3  248.60    8.02
   4  14  -3  243.26    7.95
  -2  14   3 1591.34   37.39
   2  14  -3 1558.18   35.91
  -2  14   3 1612.34   35.51
   0  14  -3  335.96    9.67
   0  14  -3  348.00   10.06
  -2  14  -3  392.81   10.76
  -2  14  -3  388.34   11.10
  -4  14  -3  400.47   11.62
  -4  14  -3  419.29   11.31
  -6  14  -3  255.15    8.42
 -10  14  -3  220.60    7.26
 -12  14  -3   17.38    2.21
 -12  14  -3   20.63    1.99
 -14  14  -3   38.04    2.46
 -14  14  -3   36.59    2.92
 -16  14  -3  100.89    4.61
 -16  14  -3  100.19    3.92
 -18  14  -3   34.26    2.27
 -17  15   3   47.86    2.60
  17  15  -3   51.61    3.88
 -17  15   3   43.86    3.04
 -15  15   3   68.33    3.87
  15  15  -3   61.75    4.48
 -15  15   3   66.14    3.08
 -13  15   3   62.67    3.09
  13  15  -3   69.93    4.67
 -13  15   3   63.94    3.84
 -11  15   3   24.19    2.48
  11  15  -3   27.64    3.14
  -9  15   3   83.74    4.07
   9  15  -3   79.54    4.53
   9  15  -3   86.48    4.97
   7  15  -3   83.24    4.63
   5  15  -3    8.21    1.84
  -5  15   3    9.61    1.75
   3  15  -3  493.40   13.23
  -3  15   3  475.62   13.55
  -1  15   3  106.62    4.79
  -1  15  -3   10.77    1.83
  -1  15  -3   13.04    1.82
  -3  15  -3  102.83    4.46
  -3  15  -3  101.20    4.65
  -5  15  -3    0.68    1.18
  -7  15  -3    0.19    2.82
 -11  15  -3   44.01    3.08
 -11  15  -3   41.99    2.62
 -13  15  -3   29.77    2.32
 -13  15  -3   27.46    2.63
 -15  15  -3    3.32    1.18
 -15  15  -3    3.56    1.45
 -17  15  -3    1.61    1.05
 -17  15  -3    1.47    1.17
 -18  16   3   -0.41    0.80
  18  16  -3    0.96    1.27
 -16  16   3    6.55    1.30
 -16  16   3    7.46    1.70
  16  16  -3    7.15    2.09
 -14  16   3   34.88    2.94
 -14  16   3   33.24    2.33
  14  16  -3   36.97    3.64
 -12  16   3   57.83    3.68
  12  16  -3   63.71    4.36
 -10  16   3  150.02    5.85
  10  16  -3  148.31    6.41
   8  16  -3    0.95    1.18
  -8  16   3    1.50    1.09
  -8  16   3   -0.28    2.65
   8  16  -3    2.42    1.58
   4  16  -3   31.12    2.89
  -4  16   3   31.58    2.77
  -2  16   3   98.19    4.94
   2  16  -3  123.91    5.08
   0  16  -3  135.32    5.47
  -2  16  -3   75.32    4.08
  -2  16  -3   75.50    3.92
  -4  16  -3  157.51    6.32
 -10  16  -3    3.48    1.37
 -10  16  -3    0.75    1.00
 -10  16  -3   -2.30    2.87
 -12  16  -3  159.51    5.14
 -12  16  -3  159.15    6.14
 -14  16  -3    0.56    1.31
 -14  16  -3    0.16    0.96
 -16  16  -3   43.32    2.57
 -16  16  -3   41.38    2.93
  17  17  -3   -0.20    1.19
 -17  17   3   -0.23    1.01
 -17  17   3    0.40    0.87
  15  17  -3   76.44    4.52
 -15  17   3   70.04    3.92
 -15  17   3   75.27    3.20
  13  17  -3  328.30   10.57
 -13  17   3  334.77    9.98
  11  17  -3    0.40    1.37
 -11  17   3   -0.28    1.08
   9  17  -3   88.44    4.71
  -9  17   3   88.72    4.37
  -7  17   3   21.17    2.25
   7  17  -3   21.31    2.54
   7  17  -3   23.01    2.77
   5  17  -3   53.52    3.46
   5  17  -3   56.47    3.71
  -5  17   3   56.72    3.25
  -1  17  -3    9.87    4.26
  -3  17  -3  608.21   15.62
  -3  17  -3  656.67   16.64
  -5  17  -3    0.37    3.05
  -5  17  -3   13.65    1.90
  -9  17  -3    5.93    1.58
  -9  17  -3    4.91    1.24
  -9  17  -3   -0.71    2.97
 -11  17  -3   24.54    2.56
 -11  17  -3   21.62    2.19
 -13  17  -3   20.81    2.06
 -13  17  -3   20.52    2.55
 -15  17  -3   59.68    2.96
 -15  17  -3   62.52    3.56
 -17  17  -3    0.24    1.01
  16  18  -3    5.95    1.69
 -16  18   3    5.97    1.52
 -14  18   3  177.28    6.56
  14  18  -3  184.65    7.09
  12  18  -3   73.68    4.45
 -12  18   3   71.71    4.08
  10  18  -3   39.36    3.35
 -10  18   3   34.66    2.89
   8  18  -3   11.13    2.05
  -8  18   3   13.05    1.98
   6  18  -3   60.42    3.78
   6  18  -3   62.21    3.97
  -6  18   3   55.02    3.35
  -4  18   3   -1.48    2.78
  -4  18   3    0.90    1.00
   4  18  -3    0.01    1.21
   2  18  -3  416.66   11.66
  -2  18   3  420.16   11.51
   2  18  -3  438.95   12.44
   2  18   3   10.76    1.76
  -2  18  -3    9.57    1.71
  -2  18  -3    9.34    1.82
  -2  18  -3    0.11    2.94
   4  18   3  157.15    6.00
  -4  18  -3  160.53    6.01
 -10  18  -3  111.72    4.16
 -10  18  -3  115.79    5.13
 -12  18  -3   21.00    2.07
 -12  18  -3   22.36    2.53
 -14  18  -3    0.71    1.21
 -14  18  -3    1.84    1.02
 -16  18  -3    2.62    1.20
 -16  18  -3    2.88    1.00
  15  19  -3   -1.40    1.11
 -15  19   3    0.95    1.19
 -13  19   3    3.68    1.50
 -11  19   3    0.18    1.18
  11  19  -3    1.62    1.48
   9  19  -3   45.00    3.42
  -9  19   3   45.91    3.21
  -7  19   3   26.37    2.54
   7  19  -3   26.43    2.74
  -5  19   3    7.18    1.54
  -5  19   3    0.09    3.21
   5  19  -3    6.77    1.84
   5  19  -3    8.28    1.79
   3  19  -3    4.86    1.64
  -3  19   3    4.03    1.34
  -3  19   3   -1.96    2.97
   3  19  -3    6.75    1.65
   1  19  -3    1.32    3.67
  -1  19   3    6.44    1.51
  -1  19   3    0.22    3.38
   1  19  -3    5.38    1.50
   1  19  -3    6.63    1.74
   1  19   3   -1.99    2.82
  -1  19  -3    1.02    1.20
   1  19   3    1.79    1.14
  -1  19  -3    0.90    1.09
  -1  19  -3   -0.63    3.20
   3  19   3  226.27    7.49
  -3  19  -3  219.13    7.50
 -11  19  -3    4.36    1.52
 -13  19  -3   30.56    2.20
 -13  19  -3   27.33    2.65
 -15  19  -3   31.02    2.49
 -15  19  -3   32.71    2.09
 -14  20   3   33.49    2.64
  14  20  -3   32.10    2.87
 -12  20   3    6.44    1.73
  12  20  -3    9.37    2.01
  10  20  -3   34.24    3.20
 -10  20   3   32.24    2.85
  -8  20   3    4.81    1.50
   8  20  -3    5.55    1.66
  -8  20   3    0.62    3.21
   6  20  -3   16.74    2.37
  -6  20   3   19.49    2.31
   4  20  -3    2.74    1.38
  -4  20   3    0.01    3.44
  -4  20   3    2.75    1.23
   4  20  -3    0.92    1.41
   2  20  -3    8.96    2.00
  -2  20   3    9.21    1.78
   2  20  -3    8.60    1.78
  -2  20  -3    1.90    3.97
   2  20   3    0.47    3.70
   2  20   3    2.22    1.27
  -2  20  -3    2.34    1.27
  -6  20  -3    0.92    1.20
  -6  20  -3    1.13    3.51
 -10  20  -3   -1.33    3.02
 -10  20  -3   -0.74    1.06
 -12  20  -3  118.03    5.07
 -14  20  -3   12.93    1.47
 -14  20  -3   14.91    1.94
  13  21  -3    7.45    1.73
 -13  21   3    7.12    1.59
  11  21  -3    2.19    1.47
 -11  21   3   -0.57    1.18
  -9  21   3   54.86    3.50
   9  21  -3   56.00    3.81
   7  21  -3  209.63    7.56
  -7  21   3  212.30    7.37
  -5  21   3   10.71    1.89
   5  21  -3   10.14    1.95
   3  21  -3   18.55    2.39
   3  21  -3   19.85    2.59
  -3  21   3   20.24    2.23
  -1  21   3   10.39    1.87
   1  21  -3   13.09    2.27
   3  21   3  192.19    6.95
  -3  21  -3  196.43    7.07
  -7  21  -3    3.65    1.44
  -7  21  -3    1.21    3.41
 -11  21  -3    9.41    1.79
 -13  21  -3  127.89    5.05
  12  22  -3    0.32    1.18
 -12  22   3   -0.19    1.06
  10  22  -3  113.25    5.12
 -10  22   3  104.47    4.79
   8  22  -3  164.78    6.46
  -8  22   3  164.61    6.27
   6  22  -3   21.37    2.60
  -6  22   3   19.37    2.43
   4  22  -3   31.61    2.85
  -4  22   3   30.55    2.65
  -2  22   3   -0.23    3.59
   2  22  -3    5.24    1.56
  -2  22   3    4.72    1.43
   0  22   3    0.84    3.67
   0  22  -3   -1.53    3.45
   0  22   3   10.26    1.84
   0  22  -3   11.47    1.99
 -10  22  -3   -1.50    2.89
 -10  22  -3   10.14    1.78
 -11  23   3   32.97    2.57
  11  23  -3   32.18    2.69
   9  23  -3  178.33    6.49
  -9  23   3  170.62    6.27
   7  23  -3    2.35    1.36
  -7  23   3   -1.09    3.50
  -7  23   3    1.07    1.24
  -5  23   3    5.15    1.56
   5  23  -3    8.22    1.88
  -3  23   3   22.03    2.47
   3  23  -3   17.87    2.41
  -5  23  -3    1.10    3.84
  -5  23  -3    2.06    1.35
  -9  23  -3   -0.20    3.07
  -9  23  -3    0.35    1.11
   8  24  -3   56.33    3.47
  -8  24   3   52.80    3.33
  -6  24   3   65.34    3.75
   6  24  -3   71.76    3.96
   4  24  -3   56.69    3.62
  -4  24   3   55.33    3.46
  -2  24   3   32.78    2.75
   2  24  -3   36.77    2.98
   0  24   3    6.23    1.54
   0  24   3    0.35    3.78
   0  24  -3    1.44    3.89
   0  24  -3   10.13    1.94
  -2  24  -3   -0.58    3.73
  -2  24  -3    4.30    1.44
  -8  24  -3   12.30    1.81
  -8  24  -3    1.32    3.40
  -7  25   3  217.52    7.06
   7  25  -3  220.77    7.23
   5  25  -3   10.70    1.86
  -5  25   3   11.39    1.84
   3  25  -3  142.35    5.63
  -3  25   3  136.98    5.43
  -1  25   3   18.39    2.20
   1  25  -3   18.70    2.27
   1  25   3    1.24    3.64
  -1  25  -3   -0.14    3.64
  -7  25  -3    2.86    1.22
  -7  25  -3   -0.63    2.91
  -4  26   3    3.73    1.33
   4  26  -3    5.36    1.40
  -4  26   3   -1.46    2.92
  -2  26   3   24.57    2.35
   2  26  -3   23.08    2.32
   0  26  -3   -1.74    3.03
   0  26   3   -0.25    3.07
  -4  26  -3    0.80    3.21
 -22   0   4    4.98    0.85
 -20   0   4    4.36    0.95
  18   0  -4   -0.90    2.56
 -18   0   4   -0.46    0.78
 -18   0   4   -0.07    0.70
  16   0  -4   13.86    3.23
 -14   0   4 1657.77   37.93
  14   0  -4 1546.88   38.73
 -12   0   4 1374.84   33.14
  12   0  -4 1456.06   34.02
  10   0  -4  226.31    7.73
 -10   0   4  216.89    6.62
  -8   0   4 1392.70   31.76
   6   0  -4    9.24    1.10
  -6   0   4   10.29    1.04
  -4   0   4   32.72    1.35
   4   0  -4   33.26    1.75
  -4   0   4   31.15    1.62
  -2   0   4  583.43   16.32
   2   0  -4  597.50   16.43
   0   0  -4  293.39    8.50
  -6   0  -4 2750.92   61.40
  -8   0  -4  240.92    7.17
 -10   0  -4   43.78    1.80
 -10   0  -4   41.80    2.70
 -12   0  -4   91.56    2.90
 -12   0  -4   88.12    4.26
 -14   0  -4  135.80    3.90
 -16   0  -4    7.48    1.23
 -18   0  -4  273.72    5.90
 -20   0  -4  212.88    4.87
 -21   1   4   -1.05    0.65
 -21  -1   4   -0.41    0.71
 -19  -1   4   -0.57    0.60
 -19   1   4    0.36    0.67
  19   1  -4    1.73    2.74
 -19   1   4    0.94    0.76
  19  -1  -4    0.41    2.45
  17   1  -4    6.16    3.02
  17  -1  -4    5.47    2.76
 -17   1   4    7.44    1.18
  15   1  -4  126.63    7.19
  15  -1  -4  133.47    7.03
  13   1  -4 1574.84   38.68
  13  -1  -4 1627.93   38.33
 -13   1   4 1606.70   37.66
 -13  -1   4 1623.85   37.76
  11  -1  -4  122.92    5.61
 -11  -1   4  121.43    4.65
 -11   1   4  119.47    4.54
  11   1  -4  118.08    6.02
  -9   1   4  395.12   10.39
  -9  -1   4  412.28   10.59
  -7  -1   4  998.35   22.77
  -7   1   4  975.58   22.59
   7   1  -4  977.27   27.21
   5   1  -4  183.85    6.13
  -5   1   4  192.62    4.94
   5  -1  -4  186.71    5.93
  -5  -1   4  188.02    5.05
  -3  -1   4 1578.21   42.95
   3  -1  -4 1609.36   42.94
   3   1  -4 1598.14   43.15
   1   1  -4   26.41    1.33
  -1  -1   4   20.41    1.19
   1  -1   4  647.16   17.77
  -1   1  -4  646.72   17.86
  -3   1  -4 2322.34   51.93
  -3   1  -4 2379.36   63.77
  -5   1  -4  186.78    5.28
  -5   1  -4  181.89    5.38
  -7   1  -4  864.71   20.74
  -7  -1  -4  883.51   21.05
  -9   1  -4   11.16    1.56
  -9  -1  -4    8.28    1.44
 -11   1  -4    1.86    1.03
 -11  -1  -4    2.86    0.69
 -11   1  -4    2.81    0.73
 -11  -1  -4    2.54    1.19
 -13  -1  -4   21.97    1.51
 -13   1  -4   22.78    1.51
 -13  -1  -4   21.90    2.34
 -13   1  -4   20.01    2.17
 -15  -1  -4  104.57    3.40
 -15   1  -4  101.53    3.42
 -17  -1  -4   26.60    1.87
 -17   1  -4   31.58    2.00
 -17  -1  -4   28.99    1.89
 -17   1  -4   30.98    1.91
 -19  -1  -4  213.68    4.98
 -19   1  -4  206.00    4.92
 -21   1  -4    1.23    0.71
 -21  -1  -4    0.60    0.72
 -22  -2   4   13.66    1.22
 -22   2   4   13.01    1.18
 -20   2   4    4.65    1.07
 -20  -2   4    2.64    0.85
 -20   2   4    4.63    0.93
  18  -2  -4   55.69    5.55
 -18   2   4   55.29    2.28
 -18  -2   4   58.55    2.31
  18   2  -4   54.38    5.98
 -18   2   4   50.82    2.59
  16  -2  -4  108.40    6.61
  16   2  -4  106.50    7.17
  14  -2  -4   41.30    3.86
 -14  -2   4   39.91    2.98
 -14   2   4   36.56    2.93
  12   2  -4  284.88   10.43
 -12   2   4  307.36    8.98
 -12  -2   4  304.03    9.07
  12  -2  -4  328.21   10.29
  10   2  -4  446.31   13.03
 -10  -2   4  436.23   11.76
 -10   2   4  457.56   11.62
  -8  -2   4   43.97    2.28
  -8   2   4   44.75    2.11
  -6   2   4 1616.11   35.90
   6  -2  -4 1591.66   43.33
   6   2  -4 1606.47   43.69
  -4   2   4  220.00    5.51
   4  -2  -4  220.68    6.69
   4   2  -4  223.06    7.12
   2   2  -4  149.39    4.98
   0  -2   4  108.39    3.61
   0   2  -4  104.66    3.66
  -2   2  -4  154.70    4.83
   2  -2   4  152.34    4.69
  -4   2  -4  195.02    5.82
  -4   2  -4  198.10    5.32
  -6   2  -4   12.52    1.19
  -8   2  -4   98.51    3.77
 -10   2  -4   47.50    1.93
 -10  -2  -4   45.44    1.87
 -10   2  -4   48.28    2.87
 -10  -2  -4   50.37    3.10
 -12   2  -4  126.15    5.13
 -12  -2  -4  122.55    3.42
 -12  -2  -4  125.52    5.37
 -12   2  -4  126.97    3.59
 -14  -2  -4   12.88    1.24
 -14   2  -4   10.40    1.22
 -16  -2  -4   46.95    2.29
 -16   2  -4   47.40    2.37
 -18   2  -4    2.45    0.93
 -18  -2  -4    2.33    0.96
 -20  -2  -4   29.73    1.87
 -20   2  -4   27.94    1.79
 -21   3   4    2.66    0.77
 -21   3   4    2.78    0.94
 -21  -3   4    2.05    0.82
 -19   3   4  127.14    3.33
 -19   3   4  121.95    4.02
  19   3  -4  117.50    7.94
 -19  -3   4  126.72    3.41
  19  -3  -4  121.09    7.66
 -17   3   4  170.06    4.88
  17  -3  -4  172.21    8.49
  17   3  -4  151.63    8.81
  15  -3  -4  127.43    6.54
  15   3  -4  111.23    7.07
 -13   3   4  295.31    8.88
 -13  -3   4  296.66    9.05
  13   3  -4  276.43   10.81
 -11   3   4  605.36   15.13
  11   3  -4  571.86   16.77
 -11  -3   4  605.31   15.44
  -9   3   4  513.76   12.78
  -9  -3   4  505.40   13.13
   7   3  -4  785.46   22.36
  -7   3   4  793.66   18.44
   5   3  -4    1.12    0.70
  -5   3   4    0.75    0.46
  -3   3   4  377.27    9.00
   3   3  -4  394.05   11.52
   1   3  -4 1677.08   45.42
   1  -3   4  936.47   25.81
  -1   3  -4  951.84   25.96
   3  -3   4 7970.78  218.40
  -3   3  -4 8119.68  181.40
  -3   3  -4 8371.58  219.42
  -5   3  -4  273.11    7.15
  -7   3  -4  208.12    6.11
  -9   3  -4   61.29    2.97
 -11   3  -4  260.37    8.09
 -11   3  -4  265.52    5.71
 -11  -3  -4  267.94    8.57
 -11  -3  -4  256.92    5.51
 -13   3  -4  100.80    4.68
 -13   3  -4  109.03    3.34
 -13  -3  -4  112.47    5.20
 -13  -3  -4  107.81    3.19
 -15  -3  -4   76.99    2.81
 -15   3  -4   82.66    3.02
 -17   3  -4    8.26    1.30
 -17   3  -4    6.27    1.15
 -17  -3  -4    6.42    1.16
 -19  -3  -4  145.36    3.91
 -19   3  -4  143.75    3.90
 -21  -3  -4    9.26    1.05
 -21   3  -4   11.03    1.08
 -22  -4   4    0.16    0.56
 -22   4   4    0.69    0.72
 -22   4   4    1.22    0.61
 -20  -4   4  110.07    3.09
 -20   4   4  108.11    3.70
 -20   4   4  105.40    3.00
 -18   4   4  111.65    3.91
  18   4  -4  110.23    7.79
 -18   4   4  111.71    3.14
  18  -4  -4  120.02    7.28
 -18  -4   4  117.41    3.25
  16  -4  -4   -1.05    1.69
  16   4  -4    1.35    2.65
 -14   4   4  111.19    4.82
  14   4  -4  110.20    7.00
  12   4  -4   74.29    5.29
 -12  -4   4   77.89    3.83
 -12   4   4   73.85    3.50
 -10   4   4    2.59    0.66
 -10   4   4    2.86    0.95
 -10  -4   4    2.80    1.19
  10   4  -4    1.81    1.64
  -8   4   4  971.02   22.63
   6   4  -4 1405.48   38.66
  -6   4   4 1398.61   31.63
   4   4  -4  132.45    4.85
  -4   4   4  123.25    3.57
  -2   4   4  710.72   16.55
   2   4  -4  750.25   20.71
   0   4   4 1311.72   29.17
   0   4  -4 1289.33   35.60
  -2   4  -4   88.16    2.70
  -2   4  -4   91.16    3.43
  -4   4  -4 1811.72   47.18
   4  -4   4 1740.83   47.05
  -4   4  -4 1711.38   39.16
  -6   4  -4  875.99   20.53
  -8   4  -4    7.59    1.18
 -10  -4  -4  173.08    4.01
 -10   4  -4  181.91    6.06
 -10   4  -4  181.74    4.25
 -12   4  -4  311.82    9.44
 -12  -4  -4  311.73    9.93
 -12   4  -4  308.70    6.60
 -12  -4  -4  303.97    6.36
 -14   4  -4   21.87    1.58
 -16   4  -4    6.27    1.16
 -18  -4  -4    9.41    1.25
 -18   4  -4   10.66    1.30
 -20  -4  -4   17.39    1.54
 -20   4  -4   16.28    1.34
 -21   5   4   98.33    2.73
 -21  -5   4  100.49    2.80
 -21   5   4   97.32    3.40
  19  -5  -4   21.88    3.92
 -19   5   4   23.38    1.99
 -19   5   4   23.96    1.57
 -19  -5   4   29.72    1.70
 -17   5   4  134.71    4.37
  17  -5  -4  129.31    7.27
  17   5  -4  125.78    8.20
 -17  -5   4  126.77    3.43
  15  -5  -4  103.01    5.96
 -15   5   4   91.62    4.04
  15   5  -4   88.46    6.69
  13   5  -4  108.24    6.90
 -13   5   4  108.30    4.59
 -11   5   4   19.39    1.85
  11   5  -4   16.80    2.97
 -11  -5   4   19.14    2.10
   9   5  -4  274.51    9.69
  -9   5   4  297.92    8.03
  -7   5   4   77.66    2.92
   7   5  -4   76.27    3.70
   5   5  -4  107.14    4.52
  -5   5   4  106.88    3.41
   3   5  -4  320.43   10.10
  -3   5   4  323.15    7.91
   1   5  -4   37.01    2.21
  -1   5   4   38.72    1.62
   1   5  -4   39.16    1.64
  -1   5  -4  138.80    4.87
  -1   5  -4  134.19    3.71
  -3   5  -4 1175.62   31.11
  -3   5  -4 1100.16   25.67
  -5   5  -4  383.58    9.65
  -7   5  -4   69.78    2.92
  -9   5  -4    5.91    1.22
  -9   5  -4    5.25    0.77
 -11   5  -4    6.14    1.35
 -11   5  -4    6.33    0.91
 -13   5  -4  212.61    7.61
 -13  -5  -4  229.14    8.35
 -13   5  -4  233.91    5.47
 -15   5  -4   17.63    1.54
 -17  -5  -4   -0.32    0.73
 -17   5  -4    0.88    0.87
 -17   5  -4    0.24    0.78
 -17   5  -4    0.87    0.88
 -19  -5  -4    2.72    0.93
 -19   5  -4    3.28    0.95
 -21  -5  -4    6.16    0.90
 -21   5  -4    5.25    0.89
 -22  -6   4   16.37    1.10
 -22   6   4   15.92    1.42
  22   6  -4   17.58    2.87
 -20   6   4   11.66    1.48
 -20  -6   4   16.85    1.40
 -18  -6   4   55.64    2.21
 -18   6   4   56.95    2.85
  18  -6  -4   54.27    5.07
  18   6  -4   55.17    5.98
  16   6  -4    3.16    3.05
 -16   6   4    3.04    1.04
  16  -6  -4    0.88    1.89
  14   6  -4   -0.29    2.11
  12   6  -4    3.41    2.39
 -12   6   4    1.97    1.13
  10   6  -4   29.60    3.78
 -10   6   4   34.82    2.20
  -8   6   4    1.05    0.71
   6   6  -4  590.20   17.66
  -6   6   4  592.37   14.20
  -4   6   4  489.38   11.77
   4   6  -4  485.83   14.79
   2   6  -4   33.29    2.15
  -2   6   4   33.07    1.57
   0   6  -4  162.06    4.43
   0   6   4  166.86    4.64
   0   6  -4  158.88    5.73
  -2   6  -4  256.73    8.06
  -2   6  -4  254.19    6.51
  -4   6  -4    7.60    1.05
  -6   6  -4   11.08    1.23
  -8   6  -4  420.62   11.26
  -8   6  -4  437.68    8.86
 -10   6  -4   43.39    2.60
 -10   6  -4   43.13    1.86
 -12   6  -4    0.90    0.68
 -12   6  -4    2.12    1.15
 -12  -6  -4    3.61    1.64
 -14   6  -4    0.99    0.71
 -14   6  -4    2.50    1.13
 -16   6  -4   20.14    1.68
 -16   6  -4   20.61    1.86
 -16  -6  -4   17.49    1.54
 -18  -6  -4   -1.26    0.70
 -18   6  -4   -0.19    0.84
 -20  -6  -4   12.03    1.17
 -21  -7   4   46.79    1.81
  21   7  -4   57.97    4.59
 -21   7   4   49.61    2.40
 -19  -7   4  175.45    4.12
 -19   7   4  192.68    5.42
  17  -7  -4   40.17    4.44
 -17  -7   4   30.92    1.80
 -17   7   4   40.61    2.54
  17   7  -4   33.91    5.01
 -15   7   4  159.99    5.75
  15   7  -4  158.91    8.77
 -13   7   4   19.96    2.16
  13   7  -4   21.81    3.81
 -11   7   4    0.51    0.87
  11   7  -4    2.80    2.05
   9   7  -4  177.53    7.70
  -9   7   4  181.81    5.76
  -7   7   4 1824.54   41.88
   7   7  -4 1882.00   51.21
   5   7  -4  117.32    5.02
  -5   7   4  118.32    3.82
   3   7  -4 1113.22   32.18
  -3   7   4 1177.18   26.16
   1   7  -4  114.08    4.65
  -1   7   4  115.22    3.64
   1   7  -4  115.01    3.61
  -1   7  -4  761.67   17.64
  -1   7  -4  760.82   21.72
  -3   7  -4  243.49    7.83
  -3   7  -4  248.09    6.56
  -5   7  -4 1180.06   27.15
  -7   7  -4   25.19    1.94
  -7   7  -4   26.69    1.56
  -9   7  -4   11.46    1.15
  -9   7  -4   10.85    1.45
  -9   7  -4   12.20    1.11
 -11   7  -4  115.84    4.83
 -11   7  -4  121.26    3.42
 -13   7  -4  527.76   10.30
 -15   7  -4    0.56    0.76
 -15   7  -4    0.40    1.03
 -15   7  -4    2.09    1.01
 -17   7  -4    8.77    1.36
 -17  -7  -4    6.72    1.10
 -17   7  -4    8.62    1.41
 -19  -7  -4   -0.19    0.75
 -19   7  -4    1.12    0.96
 -21  -7  -4   -0.80    0.51
 -20  -8   4  215.74    4.54
  20   8  -4  226.06    9.13
 -20   8   4  235.66    6.03
  18  -8  -4  134.38    7.59
 -18   8   4  148.25    4.70
 -16   8   4   91.61    3.58
 -16   8   4   88.16    4.19
  16   8  -4   83.56    6.65
 -14   8   4   37.70    2.67
  14   8  -4   35.76    4.80
 -12   8   4   50.54    2.98
  12   8  -4   53.95    4.95
  10   8  -4  333.67   11.49
 -10   8   4  335.30    9.50
   8   8  -4 1468.16   36.29
  -8   8   4 1635.42   35.83
  -6   8   4  402.86   10.41
  -4   8   4 1044.45   23.08
   4   8  -4  934.66   28.31
   2   8  -4   57.30    3.22
  -2   8   4   67.01    2.58
   0   8   4 1112.16   24.97
   0   8  -4 1052.72   30.34
   0   8  -4 1072.34   24.73
  -2   8  -4  513.04   12.32
  -2   8  -4  497.71   15.02
  -4   8  -4  589.44   14.34
  -6   8  -4  109.00    4.00
  -6   8  -4  119.23    3.32
  -8   8  -4  520.63   13.50
  -8   8  -4  543.31   10.67
  -8   8  -4  492.88    9.38
 -10   8  -4   95.27    2.87
 -10   8  -4   86.68    3.99
 -12   8  -4  598.07   11.17
 -12   8  -4  579.61   15.88
 -14   8  -4  210.35    5.39
 -14   8  -4  220.05    7.02
 -16   8  -4    8.59    1.71
 -16   8  -4    6.70    1.22
 -16   8  -4    5.56    1.31
 -18   8  -4    0.95    0.98
 -18  -8  -4    0.16    0.81
 -20  -8  -4    4.16    0.82
 -20   8  -4    6.10    1.15
  21   9  -4   27.76    3.25
 -21   9   4   25.04    1.78
 -19   9   4   58.66    2.90
  19   9  -4   54.02    4.85
 -17   9   4    8.18    1.74
 -17   9   4    7.01    1.34
  17  -9  -4    6.86    2.49
 -15   9   4    0.48    1.04
 -15   9   4    0.15    0.84
  15   9  -4   -0.81    2.38
  13   9  -4    2.08    2.29
 -13   9   4    0.93    0.89
 -11   9   4   23.72    2.08
  11   9  -4   27.38    3.54
   9   9  -4   92.52    5.26
  -9   9   4   95.23    3.95
   7   9  -4  435.91   12.85
  -7   9   4  459.56   11.76
  -5   9   4  483.24   12.25
   3   9  -4  453.58   14.88
  -3   9   4  502.35   12.09
   1   9  -4  221.72    8.21
   1   9  -4  235.70    6.62
  -1   9   4  250.52    6.75
  -1   9  -4  278.47    9.38
  -1   9  -4  283.26    7.55
  -3   9  -4  367.11    9.55
  -5   9  -4  413.00   10.72
  -5   9  -4  405.27    8.52
  -7   9  -4    2.61    1.09
  -7   9  -4    3.23    0.81
  -9   9  -4   13.39    1.68
 -11   9  -4   28.76    1.65
 -11   9  -4   27.86    2.37
 -13   9  -4   77.90    2.88
 -13   9  -4   78.75    3.84
 -15   9  -4   52.21    2.74
 -15   9  -4   52.18    2.45
 -15   9  -4   49.19    3.16
 -17   9  -4   11.01    1.54
 -19   9  -4    2.79    1.09
  20  10  -4    6.75    2.25
 -20  10   4    8.00    1.31
  18  10  -4   16.49    3.29
 -18  10   4   19.36    1.95
 -16  10   4    6.82    1.65
  16  10  -4    6.77    2.69
 -16  10   4    5.59    1.30
  14  10  -4   18.77    3.64
  14  10  -4   21.06    3.32
 -14  10   4   18.49    2.15
  12  10  -4   -0.58    1.88
 -10  10   4    2.25    1.03
  10  10  -4    2.30    1.86
  -8  10   4   55.13    2.88
   8  10  -4   57.48    4.16
  -6  10   4    7.39    1.27
   6  10  -4    7.57    1.71
  -4  10   4  870.18   20.83
  -2  10   4   10.17    1.39
   0  10   4    1.20    0.82
   0  10  -4    0.98    0.89
   0  10  -4    1.14    0.70
  -2  10  -4   20.13    1.56
  -4  10  -4  183.50    5.67
  -4  10  -4  179.71    5.69
  -6  10  -4   59.31    2.99
  -8  10  -4   17.78    1.77
 -10  10  -4   71.76    3.75
 -12  10  -4   17.67    2.06
 -14  10  -4   36.25    2.75
 -14  10  -4   32.85    2.32
 -16  10  -4   13.63    1.65
 -16  10  -4   12.98    1.95
 -18  10  -4   15.04    1.70
 -20  10  -4    0.97    0.83
  19  11  -4   43.38    4.05
 -19  11   4   41.05    2.47
 -17  11   4   47.28    3.26
  17  11  -4   50.16    4.55
 -17  11   4   50.98    2.79
 -15  11   4    9.55    1.43
  15  11  -4    6.67    2.61
 -15  11   4    7.08    1.66
 -13  11   4  107.41    4.71
  13  11  -4  113.29    6.79
  13  11  -4  116.44    6.34
 -11  11   4   13.73    1.91
  11  11  -4   15.16    3.00
  -9  11   4   32.52    2.42
   9  11  -4   32.86    3.43
  -7  11   4  335.18    9.50
   7  11  -4  323.57   10.33
  -5  11   4  530.22   13.65
   5  11  -4  520.81   14.02
  -3  11   4  362.41    9.75
   3  11  -4  346.67    9.86
   1  11  -4  441.79   11.23
   1  11  -4  406.73   10.95
  -1  11   4  416.90   11.17
  -3  11  -4   79.50    3.38
  -3  11  -4   78.54    3.38
  -5  11  -4  981.00   23.61
  -7  11  -4   81.70    3.76
  -9  11  -4  195.52    6.84
 -13  11  -4  311.92    7.78
 -13  11  -4  309.42    9.22
 -15  11  -4    4.80    1.23
 -15  11  -4    5.45    1.52
 -17  11  -4    7.96    1.69
 -17  11  -4    8.15    1.50
 -19  11  -4   14.56    1.59
 -20  12   4   29.12    1.96
  20  12  -4   33.79    3.22
 -18  12   4   15.57    1.75
  18  12  -4   14.09    2.76
 -16  12   4   23.65    2.50
 -16  12   4   22.82    2.07
  16  12  -4   21.69    3.27
 -14  12   4  145.20    4.76
  14  12  -4  147.95    7.12
 -14  12   4  149.51    5.76
  12  12  -4   22.98    3.49
 -12  12   4   24.66    2.36
  12  12  -4   25.15    3.16
  10  12  -4   50.55    4.16
 -10  12   4   47.37    3.07
   8  12  -4  179.72    7.21
  -8  12   4  178.30    6.34
   6  12  -4  867.38   21.39
  -6  12   4  843.43   21.13
   4  12  -4   55.00    3.38
  -4  12   4   51.44    2.83
  -2  12   4   19.28    1.97
   2  12  -4   17.80    1.92
   0  12  -4    2.73    0.99
   0  12   4    2.50    1.05
  -2  12  -4    7.88    1.40
  -2  12  -4    8.87    1.49
  -4  12  -4    5.81    1.28
  -4  12  -4    6.28    1.21
  -6  12  -4  422.80   11.74
  -8  12  -4    0.06    0.93
 -12  12  -4   67.76    3.69
 -14  12  -4    4.10    1.20
 -14  12  -4    4.55    1.51
 -16  12  -4   16.28    1.80
 -16  12  -4   16.26    2.11
 -18  12  -4    0.84    1.03
  19  13  -4    0.45    1.58
 -19  13   4    0.46    0.90
  17  13  -4   85.82    5.27
 -17  13   4   80.85    4.15
 -17  13   4   81.10    3.40
 -15  13   4  178.26    5.34
  15  13  -4  178.43    7.78
 -15  13   4  171.37    6.38
 -13  13   4    7.06    1.36
  13  13  -4    5.70    2.22
 -13  13   4    6.90    1.61
  11  13  -4   23.30    2.97
  11  13  -4   22.05    3.23
 -11  13   4   24.06    2.28
   9  13  -4    1.49    1.70
  -9  13   4    1.80    1.21
   7  13  -4   16.80    2.44
  -7  13   4   16.67    1.90
   5  13  -4   56.15    3.46
  -5  13   4   51.17    2.99
  -3  13   4  461.77   12.41
   3  13  -4  446.31   12.23
   1  13  -4  109.30    4.32
  -1  13   4   82.62    3.97
  -1  13  -4  273.67    8.24
  -1  13  -4  276.66    8.12
  -3  13  -4    0.56    0.77
  -3  13  -4    0.87    0.92
  -5  13  -4    1.13    0.97
  -7  13  -4   88.90    4.26
 -11  13  -4   52.07    3.22
 -13  13  -4    0.88    1.17
 -13  13  -4    0.68    0.91
 -15  13  -4    4.05    1.44
 -15  13  -4    4.40    1.24
 -17  13  -4   31.30    2.31
 -17  13  -4   29.69    2.55
 -19  13  -4    6.19    1.19
  18  14  -4   17.25    2.66
 -18  14   4   19.19    1.84
 -16  14   4   65.87    3.76
  16  14  -4   68.68    4.79
 -16  14   4   66.11    3.10
 -14  14   4    8.29    1.80
  14  14  -4    9.15    2.38
 -14  14   4    7.70    1.41
 -12  14   4  162.00    6.07
  12  14  -4  146.58    6.82
 -12  14   4  158.55    4.86
 -10  14   4    3.66    1.28
  10  14  -4    4.36    1.80
  10  14  -4    1.30    1.78
   8  14  -4   52.71    4.01
  -8  14   4   50.01    3.29
   6  14  -4  229.41    7.97
  -6  14   4  213.40    7.45
  -4  14   4    3.39    1.33
  -2  14   4  194.56    7.15
   2  14  -4  251.89    7.56
   0  14  -4  127.27    4.98
   0  14  -4  131.85    5.10
  -2  14  -4  100.76    4.38
  -2  14  -4  101.22    4.30
  -4  14  -4    6.43    1.42
  -4  14  -4    6.45    1.53
  -6  14  -4  234.88    7.97
  -8  14  -4    0.96    2.87
 -10  14  -4    4.65    1.37
 -12  14  -4    5.41    1.26
 -12  14  -4    4.53    1.41
 -14  14  -4   38.50    2.99
 -14  14  -4   37.57    2.51
 -16  14  -4    6.22    1.61
 -16  14  -4    5.26    1.34
 -18  14  -4   38.38    2.36
  17  15  -4    3.54    1.81
 -17  15   4    2.20    1.32
 -17  15   4    2.06    1.03
 -15  15   4   29.73    2.18
  15  15  -4   35.51    3.70
 -15  15   4   27.90    2.79
 -13  15   4  231.31    7.72
 -13  15   4  223.93    6.24
  13  15  -4  226.13    8.62
 -11  15   4    0.45    1.07
  11  15  -4    0.84    1.49
   9  15  -4  484.91   14.18
   9  15  -4  455.05   13.18
  -9  15   4  465.38   12.45
   7  15  -4   33.40    3.19
  -5  15   4  146.89    5.92
   5  15  -4  156.40    6.20
  -3  15   4  283.02    9.23
   3  15  -4  308.74    9.28
   1  15  -4  986.86   23.64
  -1  15  -4   20.80    2.12
  -1  15  -4   21.28    2.19
  -3  15  -4  682.94   17.17
  -3  15  -4  674.83   17.81
  -5  15  -4  145.45    5.87
 -11  15  -4    7.27    1.64
 -11  15  -4    6.83    1.35
 -13  15  -4    0.09    1.13
  13  15   4    1.05    0.87
 -13  15  -4    0.61    0.92
 -15  15  -4   84.61    4.23
 -15  15  -4   84.41    3.57
 -17  15  -4   12.08    1.81
 -17  15  -4   13.46    1.61
 -18  16   4   11.48    1.38
  18  16  -4   12.94    2.10
 -16  16   4   58.79    2.85
  16  16  -4   59.47    4.19
 -16  16   4   58.85    3.54
 -14  16   4  167.67    5.17
 -14  16   4  178.29    6.57
  14  16  -4  187.63    7.53
  12  16  -4   54.89    4.12
 -12  16   4   55.15    3.55
 -10  16   4  105.38    4.77
  10  16  -4  102.63    5.29
  -8  16   4  174.75    6.26
   8  16  -4  179.07    7.26
   8  16  -4  167.80    6.70
   6  16  -4   36.28    2.95
   6  16  -4   38.20    3.21
  -4  16   4  439.17   13.00
   4  16  -4  446.48   12.67
   2  16  -4  896.71   22.32
  -2  16   4  930.04   23.36
   0  16  -4   43.89    3.06
  -2  16  -4  633.69   16.44
  -2  16  -4  640.69   17.17
 -10  16  -4   75.14    3.97
 -10  16  -4   69.78    3.25
 -12  16  -4    6.09    1.36
 -12  16  -4    5.30    1.51
 -14  16  -4   45.55    3.18
 -14  16  -4   44.34    2.67
 -16  16  -4    0.72    1.11
 -16  16  -4    2.24    1.12
 -17  17   4    5.03    1.38
 -17  17   4    5.56    1.14
  17  17  -4    6.69    1.71
  15  17  -4   47.86    3.76
 -15  17   4   46.30    3.20
  13  17  -4   21.26    2.82
 -13  17   4   24.47    2.65
 -11  17   4    3.38    1.42
  11  17  -4    2.91    1.60
   9  17  -4    8.20    1.96
   9  17  -4    9.49    2.25
  -9  17   4    6.46    1.57
  -7  17   4   20.35    2.21
   7  17  -4   24.88    2.87
   7  17  -4   21.30    2.56
  -5  17   4  139.06    5.37
   5  17  -4  147.31    6.14
   5  17  -4  141.03    5.76
   3  17  -4  290.88    8.99
   3  17  -4  310.08    9.64
  -5  17  -4    4.64    1.39
  -5  17  -4   -0.83    2.72
  -9  17  -4   33.29    2.30
  -9  17  -4   36.75    2.93
 -11  17  -4   -1.27    0.79
 -11  17  -4   -0.44    1.11
 -13  17  -4   35.94    2.92
 -13  17  -4   34.43    2.42
 -15  17  -4    0.32    1.00
 -15  17  -4    0.85    1.14
 -16  18   4    0.21    1.08
  16  18  -4   -0.44    1.18
  14  18  -4   64.82    4.18
 -14  18   4   61.89    3.68
 -12  18   4   46.32    3.33
  12  18  -4   46.92    3.65
  10  18  -4   95.23    4.96
 -10  18   4   92.00    4.55
   8  18  -4    0.90    1.30
  -8  18   4   -0.32    2.91
   8  18  -4    1.12    1.45
  -8  18   4    2.25    1.27
  -6  18   4   46.62    3.11
   6  18  -4   46.69    3.40
   6  18  -4   48.45    3.59
   4  18  -4   83.79    4.36
  -4  18   4   88.73    4.17
   4  18  -4   91.12    4.68
  -2  18   4   -0.14    2.96
   2  18  -4    6.54    1.69
   2  18  -4    6.44    1.51
  -2  18   4    6.07    1.46
 -10  18  -4   26.44    2.23
 -10  18  -4   26.71    2.58
 -12  18  -4   93.22    3.78
 -12  18  -4   96.69    4.66
 -14  18  -4    2.05    1.04
 -14  18  -4    2.93    1.35
 -16  18  -4   51.46    2.53
  15  19  -4   30.19    2.81
 -15  19   4   29.36    2.53
  13  19  -4  249.92    8.53
 -13  19   4  247.64    8.10
 -11  19   4    1.54    1.25
  11  19  -4    1.29    1.48
   9  19  -4   21.05    2.62
  -9  19   4   21.44    2.36
  -7  19   4   34.60    2.80
   7  19  -4   37.81    3.15
   5  19  -4    6.14    1.82
  -5  19   4   -0.61    3.05
   5  19  -4    3.66    1.47
  -5  19   4    4.69    1.39
   3  19  -4   65.47    3.84
  -3  19   4   63.82    3.60
   3  19  -4   65.14    4.07
  -3  19  -4   -0.43    3.35
  -3  19  -4    1.58    1.13
   3  19   4    0.27    3.34
  -9  19  -4   11.99    1.98
  -9  19  -4   -0.94    2.90
 -11  19  -4   20.81    2.01
 -11  19  -4   22.45    2.51
 -13  19  -4   41.46    3.01
 -13  19  -4   44.45    2.53
 -15  19  -4    5.32    1.15
 -15  19  -4    5.25    1.41
 -14  20   4   13.38    1.93
  14  20  -4   13.11    2.16
  12  20  -4  107.80    5.18
 -12  20   4  100.32    4.72
  10  20  -4   64.44    4.15
 -10  20   4   62.49    3.79
   8  20  -4   97.29    4.90
  -8  20   4   96.20    4.63
   6  20  -4   13.07    2.18
  -6  20   4   13.59    2.03
   4  20  -4  139.47    5.79
  -4  20   4  129.36    5.39
   4  20  -4  136.98    6.05
   2  20  -4    8.53    1.81
  -2  20   4    8.05    1.67
   2  20  -4    8.36    1.90
  -8  20  -4    0.00    1.08
  -8  20  -4    0.18    3.11
 -10  20  -4   -0.34    3.07
 -10  20  -4    0.11    1.16
 -12  20  -4    4.13    1.18
 -12  20  -4    2.26    1.35
 -14  20  -4   42.61    2.32
 -14  20  -4   39.72    2.73
 -13  21   4    0.58    1.10
  13  21  -4    0.67    1.27
 -11  21   4  118.94    5.13
  11  21  -4  125.88    5.53
   9  21  -4   87.54    4.62
  -9  21   4   81.99    4.29
  -7  21   4   11.95    1.97
   7  21  -4    9.78    1.93
  -5  21   4   21.34    2.33
   5  21  -4   22.79    2.52
   3  21  -4    1.01    1.41
   3  21  -4    0.64    1.21
  -3  21   4    0.49    3.50
  -3  21   4    1.53    1.12
   1  21  -4    9.66    2.11
  -1  21   4   -2.19    3.47
   1  21  -4    0.95    4.04
   1  21  -4    9.66    1.91
  -1  21   4    9.20    1.78
   1  21   4   -1.14    3.52
  -1  21  -4    1.09    4.15
  -1  21  -4    1.11    1.24
  -1  21  -4    2.89    1.53
  -5  21  -4    1.47    1.17
  -5  21  -4   -1.00    3.24
  -7  21  -4   -0.65    1.05
  -7  21  -4   -1.48    3.17
  -9  21  -4    0.76    3.37
  -9  21  -4    0.68    1.19
 -11  21  -4    5.25    1.49
 -13  21  -4    0.88    1.10
 -12  22   4    9.39    1.71
  12  22  -4   10.95    1.89
 -10  22   4   43.42    3.12
  10  22  -4   47.66    3.44
  -8  22   4   82.91    4.26
   8  22  -4   86.11    4.49
   6  22  -4   68.18    4.07
  -6  22   4   74.65    4.01
  -4  22   4    0.00    3.44
   4  22  -4    2.05    1.34
  -4  22   4    2.98    1.29
   2  22  -4    4.01    1.42
  -2  22   4    4.39    1.38
  -2  22   4    1.23    3.75
   2  22  -4    4.74    1.67
  -2  22  -4    1.62    3.86
  -8  22  -4   12.86    1.99
  -8  22  -4   -0.40    3.17
 -10  22  -4   -1.40    2.91
 -10  22  -4    0.93    1.13
 -11  23   4    1.33    1.11
  11  23  -4    3.64    1.37
   9  23  -4  126.99    5.38
  -9  23   4  127.14    5.19
   7  23  -4  127.69    5.46
  -7  23   4  128.45    5.31
  -5  23   4    0.97    1.20
  -5  23   4   -2.37    3.08
   5  23  -4    0.29    1.25
  -3  23   4   86.94    4.32
   3  23  -4   89.55    4.63
  -1  23  -4   -1.11    3.73
  -1  23  -4    6.75    1.80
   1  23   4    1.39    4.00
   8  24  -4  129.60    5.33
  -8  24   4  128.96    5.16
   6  24  -4   11.00    1.99
  -6  24   4   11.69    1.94
   4  24  -4   57.59    3.63
  -4  24   4   55.31    3.45
  -2  24   4   64.80    3.66
   2  24  -4   65.41    3.86
  -6  24  -4    2.25    3.86
  -6  24  -4    3.96    1.36
  -7  25   4    1.77    1.15
   7  25  -4    2.58    1.26
  -7  25   4   -1.00    3.12
   5  25  -4    2.05    1.27
  -5  25   4    1.73    1.20
  -5  25   4   -1.14    3.26
   3  25  -4    0.48    1.15
  -3  25   4    0.54    3.53
   1  25   4    0.22    3.50
  -1  25  -4   -0.28    3.51
  -1  25  -4   10.05    1.78
  -5  25  -4   -0.12    3.31
  -5  25  -4    2.37    1.22
   2  26  -4    2.11    1.21
  -2  26   4   -1.30    2.81
  -2  26  -4    0.34    3.39
  -2  26  -4    3.62    1.26
 -22   0   5    0.47    0.61
 -20   0   5    0.05    0.78
 -20   0   5   -1.24    0.65
 -18   0   5    2.29    0.82
  18   0  -5   -0.72    2.57
 -18   0   5   -0.40    0.77
  16   0  -5   -0.73    2.00
  12   0  -5    1.66    1.46
 -12   0   5    1.25    0.93
  10   0  -5    0.37    1.17
 -10   0   5   -0.32    0.74
  -8   0   5    1.33    0.72
   4   0  -5    2.01    0.72
   2   0  -5    1.42    0.53
   0   0  -5   -0.06    0.40
  -6   0  -5    0.55    0.81
  -8   0  -5    0.28    0.91
 -10   0  -5    0.16    0.58
 -10   0  -5    0.55    1.01
 -12   0  -5   -0.13    0.58
 -12   0  -5    0.54    1.14
 -14   0  -5   -0.25    0.58
 -16   0  -5   -0.14    0.72
 -18   0  -5    2.73    0.99
 -20   0  -5    1.05    0.82
 -21   1   5    0.66    0.73
 -21  -1   5    0.48    0.75
 -21   1   5    2.14    0.89
  19   1  -5   -1.38    2.40
 -19  -1   5    0.76    0.73
 -19   1   5    0.85    0.68
 -19   1   5    1.30    0.82
  19  -1  -5    2.78    2.73
 -17  -1   5   88.72    3.17
 -17   1   5   89.74    3.31
  17  -1  -5   95.93    6.60
  17   1  -5   84.70    6.54
  15  -1  -5  105.09    6.22
  15   1  -5   99.54    6.45
  13   1  -5  244.66    9.84
 -13   1   5  275.84    8.34
  13  -1  -5  274.50    9.82
 -11  -1   5  143.37    5.11
  11  -1  -5  145.31    6.28
  11   1  -5  144.41    6.52
 -11   1   5  149.18    5.07
  -9  -1   5 1138.64   26.41
  -9   1   5 1134.15   26.30
  -7   1   5   22.43    1.39
  -5  -1   5  375.19    8.91
   5  -1  -5  364.50   10.90
  -5   1   5  368.11    8.80
   5   1  -5  369.74   11.13
   3  -1  -5  284.96    8.42
   3   1  -5  278.99    8.60
   1   1  -5  254.56    7.71
  -1   1  -5   60.82    2.41
  -3   1  -5  317.43    9.15
  -3   1  -5  313.58    7.81
  -5   1  -5 1094.64   25.18
  -7  -1  -5  238.83    7.15
  -7   1  -5  240.25    6.93
  -9   1  -5    5.72    1.23
  -9  -1  -5    5.01    1.25
 -11  -1  -5    1.04    0.60
 -11   1  -5    1.02    0.96
 -11   1  -5    1.21    0.59
 -11  -1  -5    0.66    0.93
 -13   1  -5    4.83    0.91
 -13  -1  -5    4.20    1.46
 -13   1  -5    3.78    1.35
 -13  -1  -5    4.12    0.83
 -15  -1  -5   55.36    2.46
 -15   1  -5   55.60    2.45
 -17   1  -5   97.40    3.17
 -17  -1  -5   87.99    3.32
 -17   1  -5   92.36    3.41
 -17  -1  -5   98.38    3.15
 -19  -1  -5  297.05    6.21
 -19   1  -5  290.00    6.16
 -21   1  -5   -0.02    0.67
 -21  -1  -5    0.46    0.73
 -22   2   5    3.99    0.94
 -22   2   5    2.11    0.68
 -22  -2   5    3.77    0.77
 -20   2   5   -0.08    0.77
 -20   2   5   -1.10    0.62
 -20  -2   5   -1.12    0.65
 -18  -2   5  187.75    4.27
 -18   2   5  177.54    4.15
  18   2  -5  169.75    9.50
 -18   2   5  174.03    5.02
  18  -2  -5  178.74    9.24
  16   2  -5   50.68    5.38
  16  -2  -5   49.55    4.82
  14  -2  -5  735.79   19.97
  14   2  -5  667.10   20.36
 -14   2   5  739.39   18.49
 -12  -2   5  124.99    4.80
  12  -2  -5  123.41    5.71
 -12   2   5  122.26    4.64
  12   2  -5  111.12    6.11
 -10   2   5 1424.29   32.13
  10   2  -5 1322.22   32.88
 -10  -2   5 1424.32   32.34
  -8   2   5    1.64    0.68
  -8  -2   5    2.33    0.81
   6  -2  -5  710.50   20.11
   6   2  -5  708.49   20.48
  -6   2   5  725.96   16.60
  -6  -2   5  722.16   16.82
   4   2  -5    3.02    0.90
   4  -2  -5    3.95    0.74
  -4   2   5    2.71    0.51
   2   2  -5  864.92   24.08
   0   2  -5  531.60   15.12
  -2   2  -5 6942.79  149.22
  -2   2  -5 6707.16  181.37
   2  -2   5 6522.35  180.96
  -4   2  -5  149.19    4.28
  -4   2  -5  146.11    4.69
  -6   2  -5 1138.54   26.29
  -8   2  -5   43.07    2.40
  -8  -2  -5   41.63    2.60
 -10  -2  -5   63.11    3.49
 -10   2  -5   66.03    3.34
 -10   2  -5   64.70    2.29
 -10  -2  -5   61.69    2.19
 -12  -2  -5  200.72    4.74
 -12   2  -5  200.51    4.86
 -12  -2  -5  195.38    7.18
 -12   2  -5  202.15    6.99
 -14  -2  -5    7.19    1.03
 -14   2  -5    8.77    1.16
 -16   2  -5    8.26    1.24
 -16  -2  -5    7.08    1.13
 -18  -2  -5  243.72    5.44
 -18   2  -5  249.29    5.47
 -18   2  -5  229.93    6.04
 -20   2  -5   70.09    2.58
 -20  -2  -5   66.75    2.56
 -21  -3   5   50.43    2.03
 -21   3   5   48.39    2.37
 -21   3   5   50.10    1.95
 -19   3   5   14.57    1.63
 -19   3   5   10.30    1.10
  19  -3  -5   11.06    3.26
  19   3  -5   15.62    3.90
 -19  -3   5   11.88    1.16
 -17   3   5    1.63    0.94
  17   3  -5    5.14    3.02
  17  -3  -5    2.11    2.22
  15   3  -5   20.75    3.72
  15  -3  -5   23.28    3.34
 -13   3   5  443.40   12.05
  13  -3  -5  461.30   13.48
  13   3  -5  396.11   13.97
  11   3  -5   15.01    2.64
 -11  -3   5   17.77    1.81
 -11   3   5   16.95    1.73
  -9  -3   5   12.85    1.51
  -9   3   5   12.47    1.36
   7   3  -5 1616.11   44.60
  -7   3   5 1635.13   36.54
   5  -3  -5  413.41   12.03
  -5   3   5  418.93    9.94
   5   3  -5  414.70   12.60
   3   3  -5  565.76   16.23
  -3   3   5  548.66   12.72
  -1   3   5 2520.48   56.69
   1   3  -5 2618.65   69.08
  -1   3  -5  598.46   16.95
  -3   3  -5 2949.39   65.22
   3  -3   5 2924.28   78.91
  -3   3  -5 3016.07   79.27
  -5   3  -5  287.46    7.58
  -7   3  -5  106.31    3.80
  -9   3  -5   68.09    2.24
  -9   3  -5   71.32    3.26
 -11  -3  -5  263.03    8.54
 -11  -3  -5  247.36    5.46
 -11   3  -5  258.08    8.06
 -11   3  -5  262.70    5.71
 -13   3  -5  166.95    6.34
 -13   3  -5  169.01    4.42
 -13  -3  -5  167.51    4.26
 -13  -3  -5  164.93    6.61
 -15  -3  -5    2.02    0.78
 -15   3  -5    2.56    0.88
 -17  -3  -5    0.99    0.88
 -17   3  -5    0.44    0.83
 -17   3  -5    0.37    0.85
 -19   3  -5    3.48    1.02
 -19  -3  -5    3.96    1.04
 -21   3  -5   -0.31    0.63
 -21  -3  -5    0.14    0.67
 -22   4   5   26.89    1.72
 -22  -4   5   27.70    1.42
 -22   4   5   27.52    1.41
 -20   4   5   11.46    1.11
 -20   4   5   11.22    1.39
 -20  -4   5   12.78    1.19
  18  -4  -5  169.87    8.70
 -18  -4   5  167.18    4.04
  18   4  -5  171.88    9.49
 -18   4   5  169.31    4.99
 -18   4   5  161.60    3.92
  16  -4  -5   87.22    5.76
  16   4  -5   86.63    6.67
  14   4  -5    2.86    2.75
 -14   4   5    1.82    1.20
  14  -4  -5    1.26    1.66
  12   4  -5   38.68    4.02
 -12   4   5   44.28    2.62
 -10  -4   5    1.33    1.11
  10   4  -5    0.64    1.61
 -10   4   5    1.39    0.85
  -8   4   5    4.14    0.87
   6  -4  -5  110.91    3.96
   6   4  -5  105.85    4.48
  -6   4   5  105.83    3.40
   4   4  -5  170.08    6.10
  -4   4   5  168.02    4.51
  -2   4   5  395.45    9.76
   2   4  -5  439.53   12.64
   0   4   5    2.93    0.67
   0   4  -5    3.17    0.88
  -4   4  -5 4911.81  127.82
  -4   4  -5 4698.61  105.38
  -6   4  -5    4.75    0.89
  -8   4  -5    6.19    1.11
 -10   4  -5   74.18    2.48
 -10  -4  -5   69.92    2.25
 -10   4  -5   70.70    3.40
 -12   4  -5   34.42    1.85
 -12  -4  -5   34.42    1.70
 -12   4  -5   33.68    2.54
 -12  -4  -5   35.89    2.91
 -14   4  -5   -0.29    0.55
 -16   4  -5   29.25    1.94
 -18  -4  -5   14.29    1.39
 -18   4  -5   14.00    1.60
 -18   4  -5   15.70    1.45
 -20  -4  -5   19.44    1.61
 -20   4  -5   17.61    1.53
 -21  -5   5   23.95    1.45
 -21   5   5   20.87    1.76
 -21   5   5   24.15    1.40
 -19  -5   5  178.73    4.14
  19   5  -5  169.23    9.41
 -19   5   5  184.15    4.12
 -19   5   5  178.99    5.13
  19  -5  -5  172.52    8.98
  17  -5  -5   11.32    3.00
 -17  -5   5   13.49    1.23
 -17   5   5   15.54    1.62
 -17   5   5   14.05    1.20
  17   5  -5   12.94    3.83
  15  -5  -5    1.25    1.75
  15   5  -5    3.71    2.72
 -13   5   5   71.12    3.66
  13   5  -5   67.62    5.75
 -11   5   5  327.86    9.05
  11   5  -5  297.88   11.08
  -9   5   5   44.93    2.32
   9   5  -5   45.95    3.76
  -7   5   5 1315.69   29.92
   7   5  -5 1310.05   36.70
   5   5  -5   71.30    3.49
  -5   5   5   71.65    2.54
   3   5  -5  201.19    7.11
  -3   5   5  208.68    5.36
   1   5  -5  190.40    4.97
   1   5  -5  195.00    6.64
  -1   5   5  188.37    5.04
  -1   5  -5  435.81   12.67
  -1   5  -5  412.37    9.95
  -3   5  -5 2766.52   72.27
  -3   5  -5 2622.74   59.48
  -5   5  -5   12.41    1.14
  -7   5  -5  131.22    4.45
  -9   5  -5   48.83    1.98
  -9   5  -5   50.00    2.81
 -11  -5  -5  137.27    5.89
 -11   5  -5  136.76    3.71
 -11   5  -5  129.82    5.15
 -13   5  -5  110.02    3.46
 -15   5  -5   23.42    1.72
 -17   5  -5    9.58    1.25
 -17  -5  -5    9.70    1.22
 -17   5  -5    9.47    1.37
 -19  -5  -5   14.45    1.36
 -19   5  -5   14.50    1.35
 -21  -5  -5   20.63    1.38
  22   6  -5   17.24    2.86
 -22   6   5   16.23    1.42
 -22  -6   5   15.92    1.10
 -20  -6   5  123.72    3.25
 -20   6   5  131.44    4.19
  18   6  -5   18.17    4.04
 -18   6   5   20.19    1.88
  18  -6  -5   21.81    3.70
 -18  -6   5   20.86    1.50
  16  -6  -5  174.39    8.23
 -16   6   5  175.30    5.14
  16   6  -5  169.23    9.34
  14   6  -5   -1.90    2.09
 -14   6   5    5.40    1.28
 -12   6   5  354.97    9.86
  12   6  -5  316.19   12.07
 -10   6   5 1142.57   25.79
  10   6  -5 1025.74   27.39
  -8   6   5  260.26    7.19
   8   6  -5  254.70    9.01
   6   6  -5   43.22    2.77
  -6   6   5   43.62    2.07
  -4   6   5 1373.42   30.46
   4   6  -5 1325.83   37.58
  -2   6   5  551.85   13.04
   0   6  -5 1378.42   31.55
   0   6  -5 1408.81   38.90
   0   6   5 1448.61   31.88
  -2   6  -5   61.95    2.92
  -2   6  -5   61.88    2.25
  -4   6  -5 1774.46   39.81
  -6   6  -5   76.58    3.01
  -8   6  -5  133.60    3.70
  -8   6  -5  131.57    4.68
 -10   6  -5   27.54    1.56
 -10   6  -5   29.84    2.23
 -12   6  -5  943.43   16.27
 -12   6  -5  898.29   22.91
 -12  -6  -5  902.11   23.89
 -14   6  -5   23.32    1.66
 -14   6  -5   22.32    2.13
 -16   6  -5   30.78    2.21
 -16  -6  -5   29.32    1.80
 -16   6  -5   34.23    2.07
 -18  -6  -5    0.16    0.76
 -18   6  -5   -0.02    0.83
 -20  -6  -5    1.73    0.78
 -21   7   5   42.20    2.24
  21   7  -5   50.26    4.37
 -21  -7   5   41.54    1.68
 -19   7   5   20.38    2.04
 -19  -7   5   19.85    1.45
  17  -7  -5    5.98    2.56
 -17   7   5    6.79    1.36
  17   7  -5   12.62    3.85
 -17  -7   5    6.93    1.02
 -15   7   5  146.20    5.38
  15   7  -5  134.44    8.18
 -13   7   5  180.97    6.40
  13   7  -5  172.75    8.64
  11   7  -5  662.38   19.46
 -11   7   5  699.48   17.25
  -9   7   5  177.25    5.61
   9   7  -5  165.04    7.61
   7   7  -5  337.84   11.27
  -7   7   5  331.59    8.86
  -5   7   5    1.93    0.72
   5   7  -5    2.25    0.95
  -3   7   5  539.72   12.98
   1   7  -5  336.76   10.87
   1   7  -5  336.81    8.54
  -1   7   5  338.46    8.59
  -1   7  -5  169.70    4.77
  -1   7  -5  170.58    6.21
  -3   7  -5    1.50    0.73
  -3   7  -5    1.22    0.62
  -5   7  -5   46.59    2.21
  -7   7  -5  965.19   23.42
  -7   7  -5 1010.90   18.56
  -9   7  -5    2.69    0.73
  -9   7  -5    1.16    0.56
  -9   7  -5    2.82    1.06
 -11   7  -5  211.43    5.00
 -11   7  -5  209.18    7.15
 -13   7  -5  161.63    4.43
 -15   7  -5    4.34    1.34
 -15   7  -5    4.97    1.15
 -15   7  -5    5.47    1.09
 -17  -7  -5    1.35    0.80
 -17   7  -5   -0.09    0.80
 -17   7  -5    0.31    0.87
 -19  -7  -5    6.17    1.04
 -19   7  -5    8.62    1.33
 -21  -7  -5    0.18    0.54
  20   8  -5    5.36    2.47
 -20   8   5    4.20    1.16
 -18   8   5    1.36    0.92
  18  -8  -5    0.32    2.07
  16   8  -5   61.03    5.96
 -16   8   5   67.05    3.64
 -16   8   5   66.48    3.08
 -14   8   5  114.93    4.66
  14   8  -5  114.60    7.30
  12   8  -5    4.98    2.53
 -12   8   5    4.36    1.26
  10   8  -5   71.66    5.02
 -10   8   5   76.18    3.48
  -8   8   5  122.08    4.40
   8   8  -5  120.41    6.09
  -6   8   5  776.22   18.54
  -4   8   5  186.86    5.39
   4   8  -5  174.84    6.98
   2   8  -5  230.33    8.30
  -2   8   5  238.54    6.49
   0   8  -5   18.32    1.80
   0   8   5   19.67    1.49
   0   8  -5   23.60    1.47
  -2   8  -5  717.52   16.97
  -2   8  -5  721.91   20.85
  -4   8  -5   35.23    1.90
  -6   8  -5   74.19    2.56
  -6   8  -5   70.89    3.10
  -8   8  -5  267.37    6.10
  -8   8  -5  246.72    5.30
  -8   8  -5  243.61    7.54
 -10   8  -5    2.37    1.18
 -10   8  -5    2.64    0.73
 -12   8  -5   80.30    2.89
 -14   8  -5    1.53    0.76
 -14   8  -5    3.14    1.22
 -16   8  -5   10.72    1.41
 -16   8  -5   11.31    1.85
 -16   8  -5   10.23    1.49
 -18  -8  -5    2.85    0.88
 -18   8  -5    2.12    1.03
 -20  -8  -5    2.37    0.74
 -20   8  -5    2.09    0.97
  21   9  -5   25.98    3.20
 -19   9   5   97.08    3.64
  19   9  -5   86.90    5.84
 -17   9   5   44.99    2.58
  17   9  -5   38.72    4.38
  17   9  -5   41.39    5.21
  17  -9  -5   41.40    4.40
 -15   9   5    5.69    1.45
 -15   9   5    9.00    1.36
  15   9  -5    4.23    2.85
  13   9  -5   19.36    3.59
 -13   9   5   19.01    2.03
  11   9  -5  116.84    6.61
 -11   9   5  114.89    4.74
  -9   9   5  662.20   16.85
   9   9  -5  680.60   18.60
  -7   9   5  807.32   18.85
   7   9  -5  736.26   19.70
  -5   9   5 1069.21   25.03
  -3   9   5  749.03   17.92
   1   9  -5 1689.73   47.96
   1   9  -5 1741.77   39.17
  -1   9   5 1760.59   39.27
  -1   9  -5  810.50   18.76
  -1   9  -5  776.70   23.04
  -3   9  -5  557.27   13.77
  -3   9  -5  562.61   11.03
  -5   9  -5  496.30   10.00
  -5   9  -5  481.38   12.44
  -7   9  -5  428.83   11.61
  -7   9  -5  444.46    9.28
  -9   9  -5  307.59    7.01
  -9   9  -5  279.78    8.70
 -11   9  -5  135.86    3.76
 -11   9  -5  133.09    5.44
 -13   9  -5  324.80    9.23
 -13   9  -5  316.45    7.08
 -15   9  -5    6.96    1.59
 -15   9  -5    5.54    1.11
 -15   9  -5    5.24    1.27
 -17   9  -5    0.53    0.96
 -17   9  -5    0.46    0.83
 -19   9  -5   -0.17    0.84
 -20  10   5   93.15    3.42
  20  10  -5   88.99    5.29
 -18  10   5   11.83    1.58
  18  10  -5   12.55    3.05
 -16  10   5    1.02    0.95
 -16  10   5    0.63    1.22
  16  10  -5    0.67    2.27
  16  10  -5   -0.67    2.56
  14  10  -5   14.61    3.02
  14  10  -5   13.05    3.21
 -14  10   5   11.99    1.80
  12  10  -5    2.16    2.11
  10  10  -5  123.65    6.41
 -10  10   5  116.46    4.76
  -8  10   5  433.62   11.65
   8  10  -5  429.28   12.98
   6  10  -5   29.53    3.11
  -6  10   5   24.06    2.04
   4  10  -5 1754.83   40.37
  -4  10   5 1856.53   41.20
  -2  10   5    9.26    1.29
   0  10  -5 1089.56   32.72
   0  10   5 1167.25   26.91
   0  10  -5 1191.81   26.74
  -2  10  -5 1091.88   30.90
  -2  10  -5 1073.28   25.26
  -4  10  -5  349.87    9.66
  -4  10  -5  372.82    9.59
  -6  10  -5    6.43    1.27
  -8  10  -5  382.29   10.78
 -10  10  -5   31.34    2.46
 -12  10  -5  427.23   11.38
 -14  10  -5  228.22    6.23
 -14  10  -5  213.42    5.52
 -14  10  -5  221.37    7.24
 -16  10  -5    3.47    1.17
 -16  10  -5    3.82    1.36
 -16  10  -5    4.19    1.07
 -18  10  -5    1.64    1.00
 -20  10  -5    3.02    0.99
  19  11  -5   20.91    3.10
 -19  11   5   22.43    1.95
 -17  11   5   83.86    3.48
  17  11  -5   86.67    5.68
 -17  11   5   84.36    4.17
  15  11  -5    6.58    2.48
 -15  11   5    5.44    1.22
  15  11  -5    5.60    2.85
 -15  11   5    4.75    1.50
  13  11  -5    8.95    2.57
 -13  11   5   11.91    1.81
  13  11  -5   11.46    3.12
  11  11  -5   75.36    5.31
 -11  11   5   59.48    3.49
  -9  11   5  186.41    6.44
   9  11  -5  188.30    7.74
  -7  11   5  226.30    7.12
   7  11  -5  224.94    8.06
   5  11  -5   39.55    3.10
  -5  11   5   36.07    2.40
   3  11  -5  175.92    6.14
  -3  11   5  188.98    5.94
  -1  11   5   23.24    1.89
   1  11  -5   23.41    1.93
   1  11  -5   21.49    1.94
  -1  11  -5   82.94    3.50
  -1  11  -5   81.49    3.34
  -3  11  -5   36.29    2.27
  -3  11  -5   32.80    2.15
  -5  11  -5   18.79    1.72
  -7  11  -5   94.27    4.07
  -9  11  -5   10.34    1.72
 -11  11  -5    4.50    1.34
 -13  11  -5   14.26    1.98
 -13  11  -5   14.37    1.70
 -15  11  -5    0.72    1.15
 -15  11  -5    0.25    0.89
 -17  11  -5    3.55    1.21
 -17  11  -5    4.13    1.40
 -19  11  -5    0.80    0.93
  20  12  -5    2.28    1.70
 -20  12   5    2.54    0.93
  18  12  -5   17.02    2.93
 -18  12   5   19.10    1.87
 -16  12   5  154.17    5.96
  16  12  -5  159.75    7.47
 -16  12   5  158.33    4.94
  14  12  -5  128.80    7.31
  14  12  -5  126.55    6.69
 -14  12   5  118.74    5.10
 -14  12   5  120.67    4.23
  12  12  -5   39.10    3.90
  12  12  -5   40.86    4.41
 -12  12   5   46.75    3.03
  10  12  -5    8.23    2.49
 -10  12   5    9.08    1.73
   8  12  -5    5.14    1.80
  -8  12   5    5.54    1.32
  -6  12   5  104.79    4.38
   6  12  -5  105.30    4.98
   4  12  -5  203.47    6.96
  -4  12   5  202.40    6.57
  -2  12   5  108.05    4.38
   2  12  -5  108.65    4.54
   0  12  -5   61.37    3.04
   0  12  -5   60.67    3.17
  -2  12  -5   32.18    2.29
  -2  12  -5   34.34    2.30
  -4  12  -5    3.20    1.05
  -4  12  -5    1.52    0.88
  -6  12  -5  225.63    7.30
  -8  12  -5    6.74    1.55
 -12  12  -5   12.92    1.63
 -12  12  -5   13.09    1.91
 -14  12  -5    2.00    1.08
 -14  12  -5    1.77    1.28
 -16  12  -5    4.61    1.53
 -16  12  -5    6.39    1.41
 -18  12  -5   25.30    2.11
  19  13  -5   14.01    2.48
 -19  13   5   11.97    1.44
 -17  13   5   24.66    2.08
 -17  13   5   25.46    2.50
  17  13  -5   26.19    3.48
 -15  13   5   18.08    2.30
  15  13  -5   18.55    3.04
 -15  13   5   18.86    1.88
  13  13  -5  526.15   16.06
 -13  13   5  480.86   10.82
 -13  13   5  499.63   13.26
  13  13  -5  490.06   14.72
 -11  13   5   23.39    2.32
  11  13  -5   25.13    3.24
  11  13  -5   26.37    3.63
   9  13  -5  152.50    6.91
  -9  13   5  141.87    5.82
   7  13  -5  468.38   13.52
  -7  13   5  460.41   12.91
   5  13  -5  434.50   12.39
  -5  13   5  440.25   12.15
   3  13  -5   79.77    3.89
  -3  13   5   68.36    3.48
   1  13  -5  185.90    6.29
  -1  13   5  187.51    6.35
  -1  13  -5    1.29    0.95
  -1  13  -5    2.14    0.99
  -3  13  -5  636.33   16.04
  -3  13  -5  655.43   16.57
  -5  13  -5   83.61    3.99
  -7  13  -5  748.21   19.34
  -9  13  -5   -0.42    2.67
 -11  13  -5    5.82    1.07
 -11  13  -5    5.08    1.39
 -13  13  -5   36.65    2.89
 -13  13  -5   40.90    2.63
 -15  13  -5   25.53    2.54
 -15  13  -5   22.53    2.02
 -17  13  -5    4.21    1.41
 -17  13  -5    3.41    1.22
  18  14  -5   22.78    3.03
 -18  14   5   21.88    1.91
 -16  14   5   76.31    4.07
  16  14  -5   79.36    5.09
 -16  14   5   71.16    3.21
 -14  14   5  170.54    5.20
  14  14  -5  175.31    7.58
 -14  14   5  173.48    6.43
  12  14  -5   -0.82    1.50
  12  14  -5   -1.58    1.78
 -12  14   5    0.84    1.12
 -10  14   5  334.89    9.78
  10  14  -5  360.05   11.78
  10  14  -5  330.63   10.76
   8  14  -5   52.21    4.05
  -6  14   5  203.01    7.23
   6  14  -5  216.65    7.79
  -4  14   5  547.20   14.59
   4  14  -5  527.27   14.42
  -2  14   5  401.58   11.33
   2  14  -5  384.17   10.99
   0  14  -5   10.04    1.59
   0  14  -5   11.02    1.61
  -2  14  -5  173.51    6.12
  -2  14  -5  169.39    6.02
  -4  14  -5   83.05    4.00
  -4  14  -5   83.55    3.89
  -6  14  -5  899.74   22.78
 -10  14  -5    2.43    1.17
 -12  14  -5   22.19    2.06
 -12  14  -5   19.45    2.28
 -14  14  -5    6.53    1.35
 -14  14  -5    6.85    1.66
 -16  14  -5   -0.14    1.09
 -16  14  -5    0.92    1.00
 -18  14  -5   99.99    3.64
  17  15  -5  105.60    5.39
 -17  15   5   99.43    4.48
 -17  15   5   88.56    3.49
 -15  15   5   51.54    3.47
  15  15  -5   52.27    4.28
 -15  15   5   48.73    2.67
  13  15  -5   13.98    2.62
 -13  15   5    9.63    1.87
 -11  15   5   43.27    3.09
  11  15  -5   41.14    4.04
  11  15  -5   38.21    3.57
   9  15  -5   56.61    3.95
   9  15  -5   58.48    4.21
  -9  15   5   54.34    3.32
   7  15  -5   -0.85    1.08
   5  15  -5  116.25    5.32
  -5  15   5  112.24    5.01
   3  15  -5  133.72    5.47
  -3  15   5  123.08    5.29
   1  15  -5   11.38    1.75
  -1  15  -5   48.56    3.04
  -1  15  -5   46.59    2.97
  -3  15  -5   35.95    2.76
  -3  15  -5   36.42    2.79
  -5  15  -5    3.20    1.43
  -9  15  -5    0.37    2.96
  -9  15  -5    5.80    1.44
  11  15   5    1.92    0.94
 -11  15  -5    4.72    1.26
 -11  15  -5    2.92    1.33
 -13  15  -5    9.37    1.82
  13  15   5    8.32    1.22
 -13  15  -5    7.54    1.41
 -15  15  -5    3.65    1.44
 -15  15  -5    3.90    1.24
 -17  15  -5   14.39    1.92
 -17  15  -5   14.44    1.67
  18  16  -5   19.59    2.49
 -18  16   5   17.61    1.66
 -16  16   5    9.42    1.81
  16  16  -5   10.69    2.34
 -16  16   5    9.92    1.44
 -14  16   5   10.62    1.97
  14  16  -5   11.97    2.51
  12  16  -5   15.82    2.65
 -12  16   5   17.58    2.29
  10  16  -5   36.89    3.40
  10  16  -5   36.50    3.67
 -10  16   5   31.70    2.74
   8  16  -5   19.69    2.54
  -8  16   5   17.82    2.16
   8  16  -5   19.75    2.71
   6  16  -5   60.21    3.93
   6  16  -5   57.56    3.64
   2  16  -5  106.00    4.88
   0  16  -5    0.38    1.05
  -2  16  -5  124.52    5.39
  -2  16  -5  120.87    5.13
  -4  16  -5    5.34    1.42
  -4  16  -5    0.14    2.88
  -4  16  -5    3.40    1.56
  -8  16  -5    2.70    1.23
  -8  16  -5   -0.38    3.09
 -10  16  -5   12.88    1.64
 -10  16  -5   12.40    1.91
 -12  16  -5   45.18    2.76
 -12  16  -5   49.01    3.27
 -14  16  -5    0.29    0.97
 -14  16  -5   -0.40    1.10
 -16  16  -5    5.20    1.44
 -16  16  -5    5.72    1.27
 -17  17   5   36.05    2.66
  17  17  -5   39.69    3.18
  15  17  -5   27.63    3.08
 -15  17   5   25.03    2.59
  13  17  -5   82.18    4.77
 -13  17   5   72.97    4.09
 -11  17   5   63.56    3.80
  11  17  -5   70.73    4.40
   9  17  -5   31.95    3.08
  -9  17   5   27.56    2.58
   9  17  -5   30.64    3.28
   7  17  -5    5.56    1.78
  -7  17   5    5.41    1.41
   7  17  -5    7.16    1.80
   5  17  -5  351.72   10.44
   5  17  -5  364.93   11.13
  -5  17   5  351.96   10.00
   3  17  -5  210.38    7.50
   3  17  -5  200.81    7.01
  -7  17  -5  294.59    8.94
  -7  17  -5  285.52    7.33
  -9  17  -5   -0.16    0.86
  -9  17  -5    0.57    1.12
  -9  17  -5   -1.23    3.10
 -11  17  -5    0.15    0.90
 -11  17  -5    0.37    1.11
 -13  17  -5    0.11    1.14
 -13  17  -5    0.44    0.93
 -15  17  -5    3.39    1.34
 -15  17  -5    3.61    1.17
 -16  18   5   64.05    3.49
  16  18  -5   66.92    3.96
  14  18  -5  118.67    5.61
 -14  18   5  113.69    5.01
 -12  18   5   14.35    2.12
  12  18  -5   15.53    2.46
 -10  18   5   10.35    1.86
  10  18  -5   12.28    2.22
  -8  18   5    1.38    3.38
   8  18  -5    2.62    1.61
  -8  18   5    2.57    1.35
   8  18  -5    4.42    1.59
   6  18  -5  106.95    5.33
  -6  18   5  107.04    4.71
   6  18  -5   99.90    4.94
  -4  18   5  190.13    6.46
   4  18  -5  180.45    6.74
   4  18  -5  186.15    7.18
   2  18  -5  261.12    8.75
  -2  18   5  258.27    7.99
   2  18  -5  250.43    8.13
  -4  18  -5    8.95    1.69
  -4  18  -5   -0.42    3.13
  -8  18  -5   13.14    2.02
  -8  18  -5   10.35    1.52
 -10  18  -5    1.00    3.18
 -10  18  -5    5.77    1.33
 -10  18  -5    6.52    1.62
 -12  18  -5    0.24    0.91
 -12  18  -5    0.19    1.18
 -14  18  -5    2.45    1.26
 -14  18  -5    0.96    0.97
 -15  19   5   25.44    2.39
  15  19  -5   25.03    2.67
 -13  19   5    1.82    1.34
  13  19  -5    2.34    1.60
 -11  19   5   32.93    2.86
  11  19  -5   34.79    3.22
   9  19  -5   70.37    4.23
  -9  19   5   69.11    3.89
   7  19  -5    5.22    1.70
   7  19  -5    4.77    1.71
  -7  19   5    4.42    1.50
  -7  19   5   -0.59    3.05
   5  19  -5    2.58    1.39
  -5  19   5    3.47    1.32
   5  19  -5    3.87    1.62
  -5  19   5    0.23    3.15
   3  19  -5   67.29    4.12
  -3  19   5   65.51    3.61
   3  19  -5   63.45    3.81
  -1  19  -5   18.15    2.32
  -9  19  -5   10.39    1.91
  -9  19  -5    0.17    3.06
 -11  19  -5   34.95    2.38
 -11  19  -5   34.39    2.87
 -13  19  -5   10.59    1.48
 -13  19  -5   10.24    1.84
 -15  19  -5   42.96    2.76
  14  20  -5   -0.24    1.21
 -14  20   5    0.20    1.09
 -12  20   5    1.88    1.34
  12  20  -5    3.16    1.61
  10  20  -5   58.18    3.92
 -10  20   5   56.27    3.53
  -8  20   5    1.47    3.45
   8  20  -5    2.62    1.38
  -8  20   5    1.11    1.13
  -6  20   5   72.71    3.95
   6  20  -5   71.23    4.40
   6  20  -5   69.91    4.14
  -4  20   5   49.20    3.23
   4  20  -5   56.30    3.83
   4  20  -5   53.70    3.58
  -2  20   5   -0.54    3.34
   2  20  -5    5.29    1.76
  -2  20   5    3.89    1.38
   2  20  -5    4.72    1.54
  -4  20  -5    0.93    1.16
  -4  20  -5    0.26    3.83
  -8  20  -5   -0.33    3.11
  -8  20  -5   13.20    2.04
 -10  20  -5   -0.18    2.96
 -10  20  -5    0.73    1.20
 -12  20  -5   67.32    3.71
 -12  20  -5   67.14    3.03
 -14  20  -5    4.83    1.10
 -14  20  -5    3.71    1.26
 -13  21   5   20.75    2.24
  13  21  -5   23.60    2.54
 -11  21   5    5.35    1.59
  11  21  -5    8.64    1.94
  -9  21   5   55.41    3.53
   9  21  -5   64.33    4.00
   7  21  -5  121.98    5.55
  -7  21   5  126.19    5.34
   5  21  -5    1.84    1.51
  -5  21   5    1.71    1.17
   5  21  -5    2.14    1.29
  -5  21   5   -1.50    2.82
   3  21  -5   62.61    4.06
  -3  21   5   59.25    3.54
   3  21  -5   62.23    3.87
  -7  21  -5    2.17    1.33
  -7  21  -5    1.17    3.63
  12  22  -5   36.49    2.93
 -12  22   5   36.81    2.72
 -10  22   5  201.62    6.97
  10  22  -5  210.93    7.41
  -8  22   5   80.54    4.16
   8  22  -5   84.82    4.51
  -6  22   5    6.64    1.65
  -6  22   5   -0.94    3.61
   6  22  -5    5.93    1.73
  -4  22   5   29.60    2.67
   4  22  -5   30.15    2.88
   4  22  -5   31.05    3.12
   2  22  -5   73.16    4.13
   2  22  -5   67.92    4.25
  -4  22  -5    8.24    1.82
  -4  22  -5   -1.38    3.33
  -6  22  -5   10.48    1.89
  -6  22  -5    1.55    3.71
 -10  22  -5    0.67    3.15
 -10  22  -5    4.09    1.35
 -11  23   5   61.86    3.37
  11  23  -5   62.48    3.56
   9  23  -5   25.24    2.61
  -9  23   5   25.51    2.44
   7  23  -5   57.37    3.61
  -7  23   5   51.61    3.32
   5  23  -5    9.56    1.97
  -5  23   5   10.30    1.90
   3  23  -5    1.24    1.33
  -3  23   5   -1.29    3.44
  -1  23  -5    7.30    1.76
   1  23   5   -2.70    3.34
  -1  23  -5    2.15    4.49
  -9  23  -5    0.63    3.20
  -9  23  -5    0.63    1.05
   8  24  -5   57.18    3.52
  -8  24   5   62.08    3.44
   6  24  -5   16.87    2.25
  -6  24   5   17.74    2.17
   2  24  -5    4.43    1.54
  -2  24   5   -1.35    3.35
   2  24   5   -0.25    3.33
  -2  24  -5    1.25    3.81
  -4  24  -5    1.84    3.74
  -4  24  -5    3.66    1.43
  -6  24  -5    1.90    3.68
  -8  24  -5    0.99    3.15
  -8  24  -5   14.61    1.92
   7  25  -5   64.75    3.60
  -7  25   5   63.17    3.40
   1  25   5    3.37    3.73
  -1  25  -5   -0.56    3.45
  -4  26   5    0.41    3.12
  -2  26   5    0.41    3.08
   2  26  -5   -0.38    0.98
  -2  26  -5    0.74    3.45
 -22   0   6   34.11    1.59
 -20   0   6    1.41    0.79
 -20   0   6    2.20    0.90
 -18   0   6  199.81    4.40
  18   0  -6  182.54    9.68
 -18   0   6  193.35    5.19
  16   0  -6    9.91    3.06
  14   0  -6  423.49   13.90
  12   0  -6  229.59    8.60
 -10   0   6  408.16   10.77
  10   0  -6  422.09   12.13
  -8   0   6  299.47    5.92
  -8   0   6  313.30    8.01
   6   0  -6 2464.26   67.18
  -6   0   6 2516.34   55.00
   4   0  -6   98.55    3.83
   2   0  -6   38.19    2.08
   0   0  -6   11.44    1.20
  -2   0  -6 3690.67   98.30
  -4   0  -6  303.73    8.73
  -4   0  -6  278.99    7.67
  -6   0  -6  509.54   12.90
  -8   0  -6  239.18    7.27
 -10   0  -6  331.89    6.72
 -10   0  -6  336.55    9.81
 -12   0  -6  181.95    6.71
 -12   0  -6  187.79    4.62
 -14   0  -6   52.39    2.33
 -16   0  -6  112.06    3.70
 -18   0  -6  409.80    8.88
 -18   0  -6  414.47    7.88
 -20   0  -6   45.50    2.16
 -21   1   6   -0.60    0.74
 -21  -1   6   -1.52    0.63
 -21   1   6   -1.70    0.55
 -19  -1   6    4.47    1.01
  19   1  -6    3.55    2.77
 -19   1   6    3.77    0.86
 -19  -1   6    4.40    0.88
  19  -1  -6    4.55    2.76
 -19   1   6    4.76    1.02
 -17   1   6    9.70    1.25
  17  -1  -6    9.04    3.01
 -17  -1   6   10.43    1.24
  17   1  -6   10.20    3.25
  15  -1  -6  115.61    6.61
  15   1  -6  113.53    6.85
  13  -1  -6  257.66    9.45
  13   1  -6  245.93    9.69
 -11   1   6   16.95    1.58
  11  -1  -6   18.37    2.47
  11   1  -6   18.34    2.66
  -9  -1   6    3.40    0.85
   7   1  -6  286.62    9.40
  -7   1   6  296.88    7.47
  -7  -1   6  287.01    5.68
  -7  -1   6  299.14    7.55
  -5  -1   6  362.53    8.47
  -5   1   6  352.13    8.41
   5  -1  -6  350.53   10.66
   5   1  -6  347.46   10.86
   3   1  -6  243.07    7.78
   3  -1  -6  246.28    7.60
   1   1  -6   85.58    3.35
  -1   1  -6 1895.39   51.05
  -3   1  -6  276.18    8.26
  -3   1  -6  273.55    6.98
  -5   1  -6 1186.25   27.26
  -7  -1  -6   67.17    3.17
  -7   1  -6   67.08    2.98
  -9  -1  -6   11.74    1.67
  -9   1  -6   14.44    1.67
  -9   1  -6   13.05    1.05
 -11   1  -6   50.56    2.13
 -11   1  -6   55.78    3.19
 -11  -1  -6   51.62    2.05
 -11  -1  -6   52.81    3.16
 -13  -1  -6   26.68    1.63
 -13   1  -6   26.00    1.67
 -13  -1  -6   26.76    2.59
 -13   1  -6   25.37    2.41
 -15  -1  -6   33.53    1.95
 -15   1  -6   32.97    2.00
 -17   1  -6   33.79    2.06
 -17  -1  -6   30.17    1.99
 -17  -1  -6   35.50    2.09
 -17   1  -6   30.82    2.03
 -19   1  -6   44.48    2.30
 -19  -1  -6   43.53    2.28
 -21   1  -6    0.13    0.69
 -21  -1  -6    0.43    0.73
 -22   2   6    3.99    0.95
 -22   2   6    4.99    0.80
 -22  -2   6    5.29    0.82
 -20  -2   6   -0.68    0.66
 -20   2   6   -0.42    0.78
 -20   2   6   -0.64    0.62
 -18  -2   6    9.14    1.08
 -18   2   6    9.12    1.07
 -18   2   6    5.66    1.17
  18  -2  -6    9.14    3.27
  16  -2  -6   36.28    4.29
  16   2  -6   34.74    4.76
  14   2  -6   15.19    3.22
  14  -2  -6   13.61    2.69
  12  -2  -6  125.41    5.72
 -12   2   6  118.42    4.53
  12   2  -6  107.19    6.06
 -10   2   6  335.34    8.87
  10   2  -6  313.93   10.44
  -8   2   6  212.97    5.86
  -8  -2   6  203.96    5.94
  -6   2   6   24.79    1.41
  -6  -2   6   20.37    1.17
   6   2  -6   20.78    2.08
  -6  -2   6   21.62    1.58
   6  -2  -6   21.71    1.72
   4  -2  -6   68.53    2.85
   4   2  -6   68.65    3.23
  -4   2   6   68.54    2.11
   2   2  -6  978.46   27.25
   0   2  -6  203.95    6.61
  -2   2  -6 3642.07   99.36
  -2   2  -6 3769.62   82.31
  -4   2  -6   17.16    1.25
  -4   2  -6   18.08    1.31
  -6   2  -6   14.85    1.36
  -8   2  -6   98.81    3.86
  -8  -2  -6   94.37    4.13
 -10   2  -6    6.60    0.93
 -10  -2  -6    7.14    1.49
 -10   2  -6    7.26    1.41
 -10  -2  -6    7.90    0.92
 -12  -2  -6   23.75    1.47
 -12   2  -6   24.20    1.54
 -12  -2  -6   24.79    2.47
 -12   2  -6   25.71    2.33
 -14  -2  -6    9.34    1.12
 -14   2  -6   10.32    1.24
 -16  -2  -6    0.43    0.71
 -16   2  -6    2.83    0.93
 -18  -2  -6   61.11    2.58
 -18   2  -6   61.43    2.79
 -18   2  -6   60.64    2.56
 -20   2  -6   19.05    1.64
 -20  -2  -6   21.07    1.66
 -21   3   6    3.15    0.75
 -21  -3   6    3.49    0.81
 -21   3   6    2.87    0.98
 -19  -3   6   75.15    2.50
 -19   3   6   68.28    2.37
 -19   3   6   69.06    2.93
  19   3  -6   70.26    6.34
  19  -3  -6   62.81    5.72
  17  -3  -6  137.55    7.63
  17   3  -6  131.46    8.24
 -17   3   6  140.77    4.33
  15  -3  -6   64.03    4.71
  15   3  -6   55.24    5.22
  13   3  -6   95.81    6.04
  13  -3  -6  111.23    5.56
 -13   3   6  105.52    4.40
  11   3  -6   87.53    5.27
 -11   3   6   95.54    3.77
  -9   3   6   30.89    1.85
   9   3  -6   24.85    2.81
  -7  -3   6  141.34    4.41
  -7   3   6  138.51    4.12
   7   3  -6  133.12    5.37
   5   3  -6  287.48    9.40
  -5   3   6  286.32    7.09
   5  -3  -6  289.57    8.81
   3   3  -6  138.03    5.18
  -3   3   6  136.32    3.59
  -1   3   6 2852.88   62.63
  -1   3  -6  279.99    8.73
  -3   3  -6 3192.73   70.31
  -3   3  -6 3200.50   85.47
  -5   3  -6 1009.75   23.30
  -7   3  -6  143.54    4.73
  -9   3  -6   43.05    2.57
  -9   3  -6   40.95    1.76
 -11   3  -6   36.20    2.51
 -11  -3  -6   28.29    2.49
 -11  -3  -6   26.64    1.52
 -11   3  -6   28.91    1.63
 -13  -3  -6   55.46    2.27
 -13   3  -6   56.47    2.39
 -13   3  -6   53.69    3.46
 -13  -3  -6   59.38    3.88
 -15   3  -6   22.86    1.71
 -15  -3  -6   20.34    1.54
 -17   3  -6   50.08    2.48
 -17   3  -6   46.52    2.22
 -17  -3  -6   47.61    2.24
 -19   3  -6   72.61    2.70
 -19  -3  -6   70.88    2.70
 -21  -3  -6    1.87    0.75
 -21   3  -6    1.52    0.73
 -22   4   6    1.64    0.79
 -22   4   6    1.76    0.65
 -22  -4   6    1.44    0.63
 -20   4   6   67.27    2.85
 -20  -4   6   67.70    2.36
 -20   4   6   69.76    2.33
 -18   4   6  188.69    4.21
  18  -4  -6  174.81    8.95
 -18  -4   6  188.65    4.27
  18   4  -6  172.74    9.65
 -18   4   6  187.78    5.24
  16  -4  -6   68.32    5.17
  16   4  -6   57.36    5.75
 -16   4   6   65.80    2.86
  14  -4  -6  179.43    7.62
  14   4  -6  155.40    8.50
 -12   4   6   28.53    2.10
  12   4  -6   26.94    3.59
  10   4  -6  155.36    7.32
 -10   4   6  175.33    5.44
  -8   4   6  253.71    6.95
  -6   4   6  271.12    6.95
   6  -4  -6  266.17    8.39
   6   4  -6  272.12    9.12
   4   4  -6   67.56    3.34
  -4   4   6   68.47    2.26
   2   4  -6  103.11    4.24
  -2   4   6   98.67    2.91
   0   4  -6   42.29    2.44
  -2   4  -6 2228.60   59.54
  -2   4  -6 2181.04   48.65
  -4   4  -6  340.87    8.60
  -6   4  -6  312.17    8.34
  -8   4  -6    1.55    0.70
  -8   4  -6    3.24    0.98
 -10   4  -6  293.44    8.80
 -10  -4  -6  292.65    5.99
 -10   4  -6  302.10    6.26
 -12   4  -6  334.16   10.13
 -12   4  -6  340.45    7.18
 -12  -4  -6  328.40   10.59
 -14   4  -6    6.03    1.04
 -16   4  -6    2.31    0.92
 -16  -4  -6    2.45    0.92
 -18  -4  -6   17.87    1.57
 -18   4  -6   20.12    1.69
 -18   4  -6   20.19    1.75
 -20   4  -6   30.23    1.76
 -20  -4  -6   24.75    1.70
 -21   5   6   39.82    1.71
 -21  -5   6   41.58    1.76
 -21   5   6   39.66    2.21
  19  -5  -6   -0.29    2.20
 -19  -5   6    2.45    0.74
 -19   5   6    0.15    0.89
  19   5  -6    2.05    2.88
 -19   5   6    1.35    0.69
 -17   5   6   24.59    1.98
 -17  -5   6   22.15    1.52
 -17   5   6   21.34    1.46
  17  -5  -6   25.61    3.85
  17   5  -6   24.57    4.63
  15  -5  -6    0.48    1.54
  15   5  -6   -1.36    2.16
  13   5  -6  207.19    9.69
 -13   5   6  238.11    7.45
  11   5  -6  100.36    6.10
 -11   5   6  115.85    4.31
  -9   5   6  102.66    3.71
   9   5  -6  100.72    5.51
   7   5  -6   27.52    2.23
  -7   5   6   21.00    1.42
  -5   5   6    9.24    0.95
   5   5  -6    9.17    1.41
  -3   5   6  212.96    5.45
   3   5  -6  203.05    7.31
  -1   5   6   35.31    1.61
   1   5  -6   32.95    2.23
   1   5  -6   33.99    1.48
  -1   5  -6 2133.99   57.30
  -1   5  -6 2091.66   46.62
  -3   5  -6   28.66    1.65
  -3   5  -6   28.82    2.11
  -5   5  -6  593.44   14.32
  -7   5  -6   49.99    2.47
  -7   5  -6   52.01    2.08
  -9   5  -6   21.07    1.86
  -9   5  -6   22.23    1.41
 -11   5  -6   33.22    2.49
 -11   5  -6   32.90    1.83
 -11  -5  -6   34.28    3.05
 -13   5  -6  170.63    4.58
 -15   5  -6    1.89    0.95
 -15   5  -6    5.99    1.12
 -17  -5  -6    1.83    0.83
 -17   5  -6    1.57    0.87
 -17   5  -6    1.10    0.83
 -19  -5  -6    3.24    0.95
 -19   5  -6    2.17    0.88
 -21  -5  -6    4.31    0.81
  22   6  -6    1.50    1.83
 -22  -6   6   -0.04    0.51
 -22   6   6    0.21    0.67
 -20   6   6   24.63    1.90
 -20  -6   6   24.95    1.47
 -18   6   6   20.75    1.93
 -18  -6   6   21.61    1.50
  18  -6  -6   19.35    3.60
  18   6  -6   22.87    4.36
 -16   6   6   -0.54    0.78
  16  -6  -6    4.19    2.21
  16   6  -6    1.68    2.87
 -14   6   6   27.59    2.28
  14   6  -6   24.07    4.07
  12   6  -6   10.49    2.91
 -12   6   6   12.06    1.75
  10   6  -6   44.98    4.29
 -10   6   6   53.89    2.73
   8   6  -6  151.03    6.80
   8   6  -6  172.33    6.78
  -8   6   6  174.98    5.21
   6   6  -6  205.94    7.67
  -6   6   6  209.00    5.81
   4   6  -6   40.97    2.66
  -4   6   6   37.12    1.76
  -2   6   6   60.09    2.22
   2   6  -6   53.93    3.06
   0   6  -6   36.60    2.43
   0   6   6   38.05    1.85
   0   6  -6   36.50    1.59
  -2   6  -6   55.91    3.13
  -2   6  -6   53.55    2.18
  -4   6  -6  995.90   22.94
  -6   6  -6  115.01    4.03
  -6   6  -6  119.83    3.34
  -8   6  -6   17.86    1.29
  -8   6  -6   20.77    1.78
  -8   6  -6   18.29    1.46
 -10   6  -6   46.64    2.80
 -10   6  -6   47.04    2.01
 -12  -6  -6    5.93    1.86
 -12   6  -6    3.41    0.90
 -12   6  -6    5.74    1.49
 -14   6  -6    1.02    0.69
 -16   6  -6   12.91    1.57
 -16  -6  -6   11.83    1.28
 -16   6  -6    9.69    1.36
 -18  -6  -6   17.87    1.55
 -18   6  -6   21.20    1.83
 -20  -6  -6   20.61    1.48
  21   7  -6   47.13    4.30
 -21  -7   6   51.46    1.83
 -19   7   6   46.61    2.55
 -19  -7   6   40.01    1.83
 -17  -7   6  149.70    3.67
  17  -7  -6  154.26    7.99
  17   7  -6  139.83    8.80
 -17   7   6  156.48    4.80
  15   7  -6   18.49    4.01
 -15   7   6   20.90    2.16
 -13   7   6  349.14   10.13
  13   7  -6  331.06   12.84
  11   7  -6  170.76    8.25
 -11   7   6  184.46    6.05
  -9   7   6  361.39    9.43
   9   7  -6  319.16   11.29
  -7   7   6  375.32    9.76
   5   7  -6  365.00   12.25
  -5   7   6  383.02    9.54
  -3   7   6  127.94    3.93
   3   7  -6  123.87    5.29
   1   7  -6  571.71   17.39
   1   7  -6  581.01   13.80
  -1   7   6  592.05   13.94
  -1   7  -6 1402.53   32.09
  -1   7  -6 1454.50   39.61
  -3   7  -6   44.99    2.03
  -3   7  -6   46.63    2.59
  -5   7  -6    4.57    0.97
  -5   7  -6    8.57    0.98
  -7   7  -6  139.15    4.79
  -7   7  -6  136.27    3.85
  -9   7  -6    1.09    0.93
  -9   7  -6    0.88    0.56
  -9   7  -6    1.57    0.67
 -11   7  -6  623.66   16.55
 -11   7  -6  626.23   11.66
 -13   7  -6  183.51    4.86
 -15   7  -6   80.95    3.31
 -15   7  -6   82.91    3.13
 -17   7  -6    8.39    1.33
 -17  -7  -6    6.40    1.05
 -17   7  -6    7.53    1.35
 -19   7  -6    5.34    1.17
 -19  -7  -6    6.07    1.01
  20   8  -6  132.50    6.91
 -20   8   6  139.50    4.34
 -18   8   6    7.88    1.36
  18   8  -6    6.41    3.18
  18  -8  -6    7.99    2.74
 -16   8   6  174.54    6.18
  16   8  -6  166.05    9.18
 -16   8   6  177.38    5.24
  16  -8  -6  177.09    8.42
  14   8  -6  106.13    7.18
 -14   8   6  122.75    4.77
 -12   8   6  573.33   15.14
  12   8  -6  568.69   17.68
 -10   8   6  905.81   21.65
  10   8  -6  867.08   23.58
  -8   8   6  317.39    8.62
   8   8  -6  293.36   10.36
  -6   8   6   13.56    1.39
   4   8  -6 1229.96   36.22
  -4   8   6 1323.58   29.32
  -2   8   6    5.63    0.95
   2   8  -6    8.91    1.48
   0   8   6 2709.17   60.03
   0   8  -6 2687.45   73.18
   0   8  -6 2687.71   59.76
  -2   8  -6  121.22    4.99
  -2   8  -6  118.23    3.81
  -4   8  -6  569.04   13.90
  -4   8  -6  565.09   11.19
  -6   8  -6   39.17    2.19
  -6   8  -6   38.70    1.84
  -8   8  -6   23.36    1.57
  -8   8  -6   20.15    1.79
  -8   8  -6   18.24    1.26
 -10   8  -6   53.67    2.18
 -10   8  -6   54.12    3.12
 -12   8  -6  752.29   13.81
 -14   8  -6   10.99    1.37
 -14   8  -6    8.63    1.36
 -16   8  -6   86.93    3.51
 -16   8  -6   87.53    3.29
 -18   8  -6    0.48    0.88
 -18  -8  -6    1.13    0.77
 -20   8  -6    1.63    0.89
 -20  -8  -6    2.97    0.75
 -21   9   6   60.54    2.58
  21   9  -6   65.87    4.42
  19   9  -6   31.01    4.12
 -19   9   6   30.53    2.15
  17   9  -6    1.32    2.17
 -17   9   6    0.10    0.85
  17   9  -6    2.17    2.69
  17  -9  -6    1.41    1.87
  15   9  -6    3.00    2.77
 -15   9   6    2.89    1.03
 -15   9   6    4.23    1.36
 -13   9   6    1.19    1.05
  13   9  -6    3.99    2.41
  11   9  -6   22.40    3.58
 -11   9   6   26.27    2.29
   9   9  -6  181.09    7.72
  -9   9   6  193.43    6.21
  -7   9   6   14.84    1.69
   7   9  -6   14.30    2.45
  -5   9   6  611.56   15.08
  -3   9   6  273.00    7.53
  -1   9   6  347.96    9.13
   1   9  -6  342.42   11.55
   1   9  -6  345.20    9.02
  -1   9  -6  272.96    9.45
  -1   9  -6  276.62    7.41
  -3   9  -6   71.53    2.43
  -3   9  -6   69.95    2.87
  -5   9  -6    2.47    0.89
  -5   9  -6    3.14    0.73
  -7   9  -6    6.01    1.22
  -7   9  -6    4.38    0.85
  -9   9  -6    1.60    0.70
  -9   9  -6    0.38    0.92
  -9   9  -6    0.85    0.78
 -11   9  -6   54.39    2.33
 -11   9  -6   53.79    3.34
 -13   9  -6   76.85    2.93
 -13   9  -6   75.95    3.82
 -15   9  -6    1.38    0.83
 -15   9  -6    4.05    1.14
 -17   9  -6    0.37    0.85
 -17   9  -6   -0.14    0.90
 -19   9  -6    0.85    0.95
 -20  10   6    1.87    0.95
  20  10  -6    2.15    1.91
 -18  10   6    5.85    1.29
  18  10  -6    2.65    2.40
  16  10  -6   17.55    3.83
  16  10  -6   16.53    3.32
 -16  10   6   19.14    2.27
 -16  10   6   20.75    1.94
 -14  10   6    2.60    1.22
  14  10  -6    0.98    2.45
  14  10  -6    2.33    2.08
  12  10  -6  192.54    8.72
  10  10  -6    7.12    2.19
 -10  10   6    8.83    1.50
   8  10  -6   39.20    3.66
  -8  10   6   31.32    2.21
  -6  10   6  335.46    9.26
   6  10  -6  327.81   10.24
  -4  10   6   88.06    3.53
   4  10  -6   81.35    4.00
  -2  10   6  342.64    9.26
   0  10  -6  100.17    3.65
  -2  10  -6  350.26   11.58
  -2  10  -6  348.08    9.27
  -4  10  -6    1.66    0.80
  -4  10  -6    1.77    0.80
  -4  10  -6    0.04    0.47
  -6  10  -6   33.00    1.81
  -6  10  -6   33.43    2.24
  -8  10  -6  153.50    5.65
  -8  10  -6  161.81    4.58
 -10  10  -6   11.56    1.80
 -12  10  -6   47.49    3.00
 -12  10  -6   44.59    2.27
 -14  10  -6   20.29    1.96
 -14  10  -6   21.87    2.35
 -14  10  -6   17.71    1.60
 -16  10  -6   13.60    1.51
 -16  10  -6    9.36    1.49
 -18  10  -6    0.95    0.95
 -19  11   6   26.62    2.05
  19  11  -6   23.74    3.21
 -17  11   6    8.28    1.73
  17 -11  -6    9.50    2.82
  17  11  -6    6.12    2.46
 -17  11   6    8.13    1.38
  15  11  -6    0.27    2.43
  15  11  -6    0.55    1.99
 -15  11   6    0.21    0.86
 -15  11   6    0.26    1.15
 -13  11   6   49.30    3.15
  13  11  -6   50.72    4.52
  13  11  -6   49.19    4.97
  11  11  -6   28.06    3.70
  -9  11   6   14.77    1.80
   9  11  -6   13.62    2.60
   7  11  -6  336.79   10.66
  -7  11   6  338.50    9.68
  -5  11   6   48.76    2.77
   5  11  -6   48.09    3.39
   3  11  -6  284.73    8.54
  -3  11   6  287.87    8.24
   1  11  -6  326.86    8.97
   1  11  -6  315.90    8.99
  -1  11   6  328.46    9.09
  -1  11  -6   65.40    3.08
  -1  11  -6   68.84    2.99
  -3  11  -6   19.29    1.79
  -3  11  -6   19.06    1.83
  -5  11  -6  214.44    6.76
  -7  11  -6    0.82    0.94
  -9  11  -6   11.03    1.76
 -11  11  -6  120.93    4.86
 -13  11  -6  279.42    7.24
 -13  11  -6  271.34    8.44
 -15  11  -6    1.82    1.22
 -15  11  -6    0.12    0.87
 -17  11  -6    3.14    1.15
 -19  11  -6   27.92    1.97
 -20  12   6   16.06    1.55
  20  12  -6   15.76    2.52
  18  12  -6   44.79    4.14
 -18  12   6   39.85    2.41
 -16  12   6   32.79    2.81
  16  12  -6   38.13    4.56
  16  12  -6   38.92    4.02
 -16  12   6   34.06    2.32
  14  12  -6   30.10    3.88
 -14  12   6   30.71    2.24
 -14  12   6   31.21    2.81
  14  12  -6   33.85    4.50
 -12  12   6    1.79    1.18
  12  12  -6    2.29    1.90
  12  12  -6    3.26    2.32
 -10  12   6    0.88    1.06
  10  12  -6    3.69    2.02
  -8  12   6  209.52    7.15
   8  12  -6  223.28    8.29
  -6  12   6  523.73   13.88
   6  12  -6  520.99   14.44
  -4  12   6    0.45    0.86
   4  12  -6    0.76    1.05
   2  12  -6   29.70    2.43
  -2  12   6   29.33    2.34
   0  12  -6   20.27    1.94
   0  12  -6   19.58    2.05
  -2  12  -6   17.38    1.73
  -2  12  -6   17.82    1.68
  -4  12  -6    6.05    1.26
  -4  12  -6    5.31    1.24
  -6  12  -6   76.87    3.71
  -8  12  -6    0.96    1.06
 -10  12  -6   -0.48    0.89
 -12  12  -6   81.73    3.50
 -12  12  -6   81.64    4.08
 -14  12  -6    3.09    1.33
 -14  12  -6    3.82    1.14
 -16  12  -6    0.09    1.15
 -16  12  -6   -1.54    0.84
 -18  12  -6   23.89    2.00
 -19  13   6   43.13    2.37
  19  13  -6   48.54    3.82
 -17  13   6  150.12    4.77
  17  13  -6  165.62    7.32
 -17  13   6  156.41    5.92
 -15  13   6    2.80    1.33
  15  13  -6    2.47    2.34
  15  13  -6    3.29    2.02
 -15  13   6    1.72    0.99
 -13  13   6  137.64    4.50
  13  13  -6  143.77    7.50
 -13  13   6  134.52    5.51
  13  13  -6  137.86    6.77
  11  13  -6    0.00    1.83
 -11  13   6    0.05    0.98
  11  13  -6   -0.01    1.50
   9  13  -6    2.47    1.83
  -9  13   6    1.09    1.17
   7  13  -6  147.99    6.45
  -7  13   6  149.61    5.73
  -5  13   6   64.47    3.38
   5  13  -6   62.89    3.84
  -3  13   6   97.52    4.23
   3  13  -6   96.90    4.36
  -1  13   6  122.11    4.79
   1  13  -6  118.37    4.77
  -1  13  -6   95.53    3.97
  -1  13  -6   89.04    3.96
  -3  13  -6    2.40    1.06
  -3  13  -6    3.20    1.05
  -5  13  -6    2.07    1.15
  -7  13  -6    9.49    1.78
  -9  13  -6   -0.10    2.68
  -9  13  -6    3.41    1.25
 -11  13  -6   23.94    2.00
 -11  13  -6   20.17    1.69
 -11  13  -6   21.92    2.32
 -13  13  -6    0.43    1.15
 -13  13  -6    1.66    1.02
 -15  13  -6   -0.08    0.90
 -15  13  -6   -0.79    1.02
 -17  13  -6    5.48    1.35
 -17  13  -6    3.73    1.36
  18  14  -6   18.04    2.70
 -18  14   6   15.14    1.59
 -16  14   6   10.30    1.47
 -16  14   6    9.36    1.82
  16  14  -6   10.31    2.51
  14  14  -6   98.55    5.65
 -14  14   6   94.93    3.69
 -14  14   6   93.94    4.58
  14  14  -6  104.62    6.30
 -12  14   6   99.88    4.66
  12  14  -6  104.88    5.70
  12  14  -6  107.78    6.32
  10  14  -6  141.79    6.87
 -10  14   6  140.04    5.41
  10  14  -6  127.64    6.14
   8  14  -6   28.42    3.22
   6  14  -6  131.86    5.89
  -6  14   6  123.35    5.23
   4  14  -6   19.17    2.42
  -4  14   6   16.51    2.03
  -2  14   6  128.04    5.21
   2  14  -6  130.76    5.25
   0  14  -6   31.78    2.51
  -2  14  -6  102.10    4.43
  -2  14  -6  102.13    4.40
  -4  14  -6    4.26    1.18
  -4  14  -6    1.26    1.06
  -6  14  -6  517.56   14.39
 -10  14  -6   12.82    1.88
 -12  14  -6   11.43    1.93
 -12  14  -6   11.56    1.58
  12  14   6   14.03    1.36
 -14  14  -6    4.34    1.26
  14  14   6    2.84    0.97
 -14  14  -6    3.74    1.43
 -16  14  -6   -0.60    0.90
  16  14   6   -0.88    0.79
 -16  14  -6   -0.42    1.08
 -18  14  -6    8.97    1.37
 -17  15   6   28.50    2.59
  17  15  -6   31.60    3.33
 -17  15   6   26.52    2.02
 -15  15   6   29.63    2.76
 -15  15   6   26.70    2.13
  15  15  -6   28.58    3.57
  13  15  -6   11.69    2.48
 -13  15   6    8.21    1.79
  13  15  -6    9.86    2.70
  11  15  -6  113.39    5.74
  11  15  -6  111.53    6.18
 -11  15   6  107.23    4.83
   9  15  -6  395.75   12.59
  -9  15   6  395.15   10.88
   9  15  -6  386.44   11.75
   5  15  -6  282.30    9.25
  -5  15   6  283.13    9.17
  -3  15   6  122.45    5.34
   3  15  -6  129.08    5.45
   1  15  -6    2.53    1.15
  -1  15  -6  135.31    5.38
  -3  15  -6   85.01    4.17
  -3  15  -6  103.41    4.58
  -5  15  -6  940.57   23.80
  -9  15  -6    8.71    1.68
  -9  15  -6   -0.88    2.75
 -11  15  -6  102.83    3.98
 -11  15  -6  107.55    4.81
  11  15   6  103.56    3.11
  13  15   6    8.50    1.19
 -13  15  -6   11.18    1.95
 -13  15  -6   10.27    1.58
 -15  15  -6   17.09    1.82
 -15  15  -6   18.61    2.25
 -17  15  -6   68.89    3.06
 -17  15  -6   68.52    3.45
 -18  16   6   70.55    2.86
  18  16  -6   85.22    4.42
 -16  16   6  150.29    5.79
  16  16  -6  153.90    6.64
 -14  16   6  112.18    5.00
  14  16  -6  115.31    5.86
  12  16  -6    0.36    1.49
 -12  16   6    0.22    1.14
  12  16  -6    1.49    1.83
  10  16  -6  365.83   11.41
  10  16  -6  372.08   12.19
 -10  16   6  364.23   10.55
   8  16  -6    6.39    2.04
   8  16  -6    7.10    1.85
  -8  16   6    6.15    1.51
   6  16  -6  515.52   14.06
   6  16  -6  552.52   15.17
   2  16  -6   27.61    2.56
   0  16  -6  139.18    5.65
  -2  16  -6  366.36   10.78
  -8  16  -6  159.96    5.96
  -8  16  -6  152.47    4.95
 -10  16  -6   15.20    1.69
 -10  16  -6   16.22    2.14
 -12  16  -6   54.35    2.93
 -12  16  -6   53.77    3.42
 -14  16  -6    0.17    1.13
 -14  16  -6    0.13    0.99
 -16  16  -6   82.17    3.95
 -16  16  -6   90.28    3.54
 -17  17   6   30.14    2.48
  17  17  -6   36.79    3.11
  15  17  -6  144.78    6.28
 -15  17   6  132.34    5.45
 -13  17   6   29.91    2.73
  13  17  -6   31.36    3.32
  11  17  -6    0.04    1.31
 -11  17   6    1.62    1.22
  11  17  -6    1.22    1.58
   9  17  -6   37.73    3.44
   9  17  -6   39.00    3.60
  -9  17   6   38.84    2.93
   7  17  -6   17.95    2.62
  -7  17   6   17.63    2.13
   7  17  -6   14.75    2.23
   5  17  -6   99.36    4.80
   5  17  -6  101.02    5.12
  -5  17   6  105.27    4.51
   3  17  -6  122.93    5.51
   3  17  -6  124.21    5.21
  -5  17  -6    4.44    1.41
  -5  17  -6   -0.35    3.03
  -7  17  -6   23.77    2.42
  -7  17  -6   26.52    2.21
  -9  17  -6    0.20    0.90
  -9  17  -6    0.45    1.10
  -9  17  -6    0.39    3.23
 -11  17  -6   66.04    3.74
 -11  17  -6   60.95    3.12
 -13  17  -6   25.07    2.47
 -13  17  -6   20.52    2.03
 -15  17  -6   41.98    2.91
 -15  17  -6   48.17    2.63
  16  18  -6    7.09    1.79
 -16  18   6    7.60    1.62
 -14  18   6   -0.24    1.19
  14  18  -6    0.21    1.45
  12  18  -6    1.09    1.48
 -12  18   6    0.12    1.15
 -10  18   6   20.11    2.34
  10  18  -6   23.77    3.04
  10  18  -6   20.68    2.69
   8  18  -6  108.84    5.29
   8  18  -6  110.88    5.66
  -8  18   6  107.34    4.92
  -6  18   6   25.43    2.45
   6  18  -6   23.23    2.81
   6  18  -6   26.00    2.74
   4  18  -6   24.36    2.59
   4  18  -6   26.58    2.80
  -2  18   6   -0.89    2.72
   2  18  -6    4.25    1.40
   2  18  -6    4.30    1.55
  -4  18  -6    0.31    3.31
  -4  18  -6    2.39    1.25
  -8  18  -6   -0.11    0.94
  -8  18  -6    0.77    1.14
  -8  18  -6    0.63    3.27
 -10  18  -6   -0.18    1.03
 -10  18  -6   -0.04    2.92
 -10  18  -6   -0.88    0.86
 -12  18  -6   69.99    3.24
 -12  18  -6   67.68    3.83
 -14  18  -6    4.43    1.22
 -14  18  -6    5.13    1.46
  15  19  -6    7.59    1.81
 -15  19   6    6.76    1.56
  13  19  -6   57.40    3.93
 -13  19   6   59.91    3.59
  11  19  -6    3.67    1.71
 -11  19   6    0.04    1.17
   9  19  -6    4.18    1.76
  -9  19   6    0.51    3.23
  -9  19   6    0.47    1.07
   9  19  -6    2.81    1.49
   7  19  -6  213.21    7.70
   7  19  -6  208.47    8.07
  -7  19   6  212.73    7.27
   5  19  -6   26.93    2.88
  -5  19   6   24.44    2.44
   5  19  -6   21.70    2.53
  -3  19   6   -0.83    3.00
   3  19  -6    4.55    1.68
   3  19  -6    5.19    1.51
  -9  19  -6   24.94    2.48
  -9  19  -6   23.02    2.07
 -11  19  -6   35.43    2.87
 -11  19  -6   33.93    2.39
 -13  19  -6   34.15    2.71
 -13  19  -6   35.12    2.29
  14  20  -6   32.10    2.89
 -14  20   6   28.72    2.50
 -12  20   6   45.97    3.17
  12  20  -6   43.81    3.46
 -10  20   6   66.29    3.82
  10  20  -6   67.37    4.19
   8  20  -6   66.84    4.11
  -8  20   6   71.98    3.88
   8  20  -6   71.41    4.45
   6  20  -6    6.00    1.84
   6  20  -6    5.24    1.66
  -6  20   6   -1.08    3.05
  -6  20   6    5.72    1.54
   4  20  -6   49.90    3.50
   4  20  -6   47.99    3.66
   2  20  -6  123.98    5.45
   2  20  -6  125.25    5.81
   2  20   6   -0.10    3.38
  -2  20  -6   -0.89    3.59
  -2  20  -6    4.85    1.65
  -2  20  -6    1.98    1.28
  -4  20  -6    1.34    3.95
  -4  20  -6   12.28    1.98
  -8  20  -6    0.80    1.15
  -8  20  -6   -0.18    3.13
 -10  20  -6   -0.75    0.93
 -10  20  -6    0.58    1.16
 -10  20  -6   -0.25    3.10
 -12  20  -6   22.18    1.96
 -12  20  -6   23.72    2.35
 -13  21   6   14.21    1.91
  13  21  -6   14.43    2.14
  11  21  -6  163.68    6.51
 -11  21   6  169.94    6.21
  -9  21   6  104.18    4.79
   9  21  -6  110.87    5.25
   7  21  -6   19.68    2.65
  -7  21   6   17.35    2.22
   7  21  -6   17.39    2.42
  -5  21   6   40.21    2.94
   5  21  -6   37.82    3.08
   5  21  -6   38.14    3.27
   3  21  -6   21.55    2.71
   3  21  -6   20.58    2.49
  -1  21   6    2.54    4.23
   1  21  -6    2.43    1.50
   1  21  -6    2.93    1.42
   1  21  -6    0.06    3.86
  -3  21  -6   -0.75    0.98
  -3  21  -6    0.94    3.77
   3  21   6   -1.66    2.88
  -5  21  -6    1.51    1.18
  -5  21  -6   -1.14    3.14
  -9  21  -6    0.45    1.07
  -9  21  -6    0.89    3.42
 -11  21  -6   -0.76    2.95
 -11  21  -6    1.39    1.14
 -12  22   6    1.64    1.19
  12  22  -6    1.00    1.28
 -10  22   6    3.86    1.42
  -8  22   6   55.15    3.41
   8  22  -6   53.46    3.61
  -6  22   6   15.38    2.12
   6  22  -6   18.77    2.45
   4  22  -6   13.94    2.17
   4  22  -6   15.17    2.44
  -2  22   6   -0.50    3.41
   2  22  -6   13.09    2.24
   2  22  -6    5.97    1.71
  -2  22  -6    4.18    1.45
  -2  22  -6    0.14    3.59
   2  22   6   -1.13    3.13
  -4  22  -6   -0.10    3.57
  -4  22  -6    0.34    1.18
  -8  22  -6   -0.62    3.09
  -8  22  -6    4.52    1.47
 -10  22  -6    1.51    3.35
 -10  22  -6    7.46    1.58
 -11  23   6   71.49    3.60
  11  23  -6   74.10    3.88
   9  23  -6   85.48    4.32
  -9  23   6   79.51    3.97
   7  23  -6   27.85    2.69
  -3  23  -6   -1.73    3.51
  -3  23  -6    2.24    1.29
  -5  23  -6   14.15    2.06
  -5  23  -6    0.61    3.55
  -9  23  -6   -0.37    2.99
  -9  23  -6    3.34    1.25
  -6  24   6   -0.89    3.21
   6  24  -6    8.74    1.81
  -2  24   6   -1.74    3.17
   2  24  -6   11.35    2.02
  -4  24  -6    0.23    3.58
  -4  24  -6    9.88    1.80
  -8  24  -6   -1.59    2.72
  -8  24  -6    3.87    1.31
   7  25  -6    6.47    1.54
  -5  25   6   -0.61    3.00
   5  25  -6   10.64    1.82
  -3  25   6   -1.10    3.03
   3  25  -6    0.66    1.18
   1  25  -6    1.05    1.16
  -1  25   6   -1.23    3.25
   1  25   6   -0.43    3.14
  -1  25  -6   -0.40    3.34
  -2  26   6    0.41    3.07
   2  26  -6   -0.35    0.98
   0  26  -6   65.75    3.51
 -22   0   7    0.59    0.62
 -20   0   7   -1.41    0.71
 -20   0   7   -1.26    0.60
 -18   0   7    1.28    0.88
  18   0  -7    0.20    2.66
 -18   0   7    0.26    0.68
  16   0  -7    1.25    2.35
  14   0  -7   -0.72    1.73
  12   0  -7    1.21    1.44
  10   0  -7    2.63    1.47
  -8   0   7    0.89    0.44
  -8   0   7    4.27    0.80
  -6   0   7    0.89    0.48
   6   0  -7    0.56    0.73
   4   0  -7    3.64    0.92
   2   0  -7    0.55    0.84
  -2   0  -7   -0.36    0.61
  -4   0  -7    0.08    0.49
  -4   0  -7    0.28    0.62
  -6   0  -7   -0.71    0.78
  -8   0  -7    0.08    0.78
 -10   0  -7    0.74    0.56
 -10   0  -7   -0.19    0.82
 -12   0  -7    1.23    1.18
 -12   0  -7    0.12    0.54
 -14   0  -7    0.31    0.59
 -16   0  -7    1.10    0.80
 -16   0  -7   -0.49    0.75
 -18   0  -7   -0.23    0.81
 -18   0  -7    2.55    0.95
 -20   0  -7   -0.67    0.76
 -21   1   7    3.01    0.96
 -21   1   7    2.17    0.76
 -21  -1   7    3.27    0.84
 -19  -1   7    5.93    0.96
  19  -1  -7    6.43    2.98
  19   1  -7    7.55    3.13
 -19  -1   7    5.45    1.07
 -19   1   7    4.26    0.87
 -19   1   7    3.74    1.00
 -17  -1   7   84.97    3.15
  17   1  -7   85.84    6.59
  17  -1  -7   90.21    6.42
 -17   1   7   90.42    3.27
  15  -1  -7   57.37    4.74
  15   1  -7   55.99    5.09
  13  -1  -7    4.03    1.83
  13   1  -7    1.14    1.62
  11  -1  -7  314.67   10.08
  11   1  -7  306.26   10.44
  -9   1   7  368.34    9.48
  -7   1   7 2358.80   50.38
  -7   1   7 2216.59   37.45
   7  -1  -7 2251.15   61.58
  -7  -1   7 2224.44   37.55
   7   1  -7 2295.67   61.80
  -5   1   7 1634.94   35.61
   5   1  -7 1582.96   44.16
   5  -1  -7 1605.17   43.93
   3   1  -7 2452.03   65.74
   3  -1  -7 2419.68   65.48
   1  -1  -7 1074.19   29.32
   1   1  -7 1054.86   29.45
  -1   1  -7  846.82   23.61
  -3   1  -7  113.76    3.51
  -3   1  -7  117.71    4.21
  -5   1  -7  764.74   18.15
  -7  -1  -7  263.78    7.81
  -7   1  -7  259.63    7.53
  -9   1  -7   72.94    2.45
  -9  -1  -7   72.77    2.40
  -9   1  -7   71.78    3.45
  -9  -1  -7   77.11    3.73
 -11   1  -7   34.01    2.51
 -11  -1  -7   31.38    1.71
 -11  -1  -7   33.45    2.58
 -11   1  -7   31.75    1.75
 -13  -1  -7   39.46    2.01
 -13  -1  -7   39.14    3.13
 -13   1  -7   42.66    2.08
 -13   1  -7   40.61    3.10
 -15   1  -7   35.07    2.06
 -15  -1  -7   38.57    2.09
 -17   1  -7  168.99    4.31
 -17  -1  -7  166.35    4.30
 -17  -1  -7  162.21    4.65
 -17   1  -7  157.85    4.67
 -19  -1  -7  111.65    3.41
 -19   1  -7  112.41    3.43
 -21   1  -7   34.74    1.78
 -21  -1  -7   35.41    1.80
 -22   2   7   20.87    1.32
 -22   2   7   18.46    1.56
 -22  -2   7   23.00    1.36
 -20   2   7    4.18    1.05
 -20  -2   7    3.05    0.82
 -20   2   7    4.70    0.89
 -18  -2   7  247.74    5.07
  18  -2  -7  236.10   10.74
 -18   2   7  241.32    4.99
  18   2  -7  210.61   10.68
 -18   2   7  238.56    6.03
 -18  -2   7  228.73    5.82
  16  -2  -7   10.39    2.95
  16   2  -7   13.56    3.42
  14   2  -7  104.05    6.55
  14  -2  -7  110.33    5.98
  12   2  -7   41.21    3.82
  12  -2  -7   41.56    3.46
 -10   2   7    1.94    0.81
  10   2  -7   -0.31    1.35
  -8   2   7  478.70   11.70
  -6   2   7  459.70   10.85
  -6  -2   7  446.51    8.34
   6  -2  -7  461.09   13.64
   6   2  -7  460.72   14.07
   4  -2  -7   20.40    1.53
   4   2  -7   21.34    1.79
  -4   2   7   19.56    0.99
   2   2  -7    1.77    0.85
   0   2  -7  891.75   24.97
  -2   2  -7  136.49    4.86
  -2   2  -7  136.37    3.69
  -4   2  -7  216.82    6.86
  -4   2  -7  213.87    5.85
  -6   2  -7  489.15   12.29
  -8  -2  -7    2.03    1.29
  -8   2  -7    1.32    0.97
 -10   2  -7  458.20   12.54
 -10  -2  -7  449.45    8.69
 -10   2  -7  475.28    8.92
 -10  -2  -7  463.76   12.93
 -12  -2  -7  162.44    6.43
 -12   2  -7  172.83    4.42
 -12   2  -7  157.19    6.15
 -12  -2  -7  162.44    4.20
 -14  -2  -7    5.06    0.97
 -14   2  -7    6.26    1.09
 -16   2  -7  119.63    3.86
 -16  -2  -7  112.64    3.51
 -16  -2  -7  111.19    3.65
 -18   2  -7   79.57    3.20
 -18   2  -7   79.00    2.87
 -18  -2  -7   77.30    2.85
 -20   2  -7    0.91    0.80
 -20  -2  -7    0.67    0.80
 -21  -3   7   10.97    1.09
 -21   3   7   11.19    1.04
 -21   3   7   11.65    1.35
 -19  -3   7    5.61    0.94
 -19   3   7    5.02    1.10
 -19   3   7    6.06    0.91
  19   3  -7    4.74    3.04
  19  -3  -7    5.79    2.72
 -17   3   7   48.35    2.47
  17   3  -7   47.54    5.45
  17  -3  -7   47.59    4.81
  15   3  -7  179.03    9.17
  15  -3  -7  197.38    8.52
  13  -3  -7   84.93    4.86
  13   3  -7   72.22    5.54
  11   3  -7   66.67    4.83
 -11   3   7   76.06    3.20
  -9   3   7   97.63    3.46
   9   3  -7   86.95    4.99
  -7   3   7  350.59    8.62
   7   3  -7  331.12   11.08
  -5  -3   7  139.92    3.23
   5  -3  -7  133.95    4.95
   5   3  -7  137.47    5.56
  -5   3   7  139.47    3.85
   3   3  -7   62.00    3.14
  -3   3   7   60.78    1.93
   1   3  -7   31.57    2.11
  -1   3   7   29.68    1.34
  -1   3  -7 1127.16   31.26
  -3   3  -7 2642.60   70.92
  -3   3  -7 2634.14   58.23
  -5   3  -7  203.41    5.76
  -7   3  -7  229.59    6.75
  -9  -3  -7   88.63    2.66
  -9  -3  -7   96.64    4.57
  -9   3  -7   95.18    2.85
  -9   3  -7   95.34    3.99
 -11  -3  -7  151.87    3.92
 -11  -3  -7  161.88    6.25
 -11   3  -7  151.00    5.73
 -11   3  -7  160.40    4.15
 -13   3  -7   45.30    2.21
 -13  -3  -7   45.33    2.06
 -15   3  -7   14.90    1.49
 -15  -3  -7   12.81    1.31
 -17   3  -7    3.75    0.98
 -17  -3  -7    2.89    0.92
 -17   3  -7    2.17    0.93
 -19   3  -7    5.97    1.12
 -19  -3  -7    7.15    1.17
 -21  -3  -7    6.19    0.95
 -21   3  -7    5.97    0.92
 -22   4   7    0.75    0.72
 -22   4   7    1.10    0.60
 -22  -4   7    1.55    0.63
 -20   4   7    9.03    0.98
 -20   4   7    8.91    1.32
 -20  -4   7    8.65    1.03
  18   4  -7    1.26    2.72
 -18   4   7    1.82    0.74
 -18  -4   7    1.15    0.72
 -18   4   7    2.42    0.99
  18  -4  -7    0.51    2.27
 -16   4   7    5.46    1.11
  16  -4  -7    5.15    2.31
  16   4  -7    4.84    3.02
  14   4  -7    4.73    2.67
  14  -4  -7    7.01    2.09
  12   4  -7   -0.92    1.80
 -10   4   7  107.15    3.94
  10   4  -7   98.21    5.81
   8   4  -7    3.39    1.11
  -8   4   7    4.66    0.87
  -6   4   7    0.66    0.52
   6   4  -7    1.96    0.99
   6  -4  -7    0.73    0.62
  -4   4   7  125.04    3.53
   4   4  -7  124.75    5.19
  -2   4   7  108.27    3.11
   2   4  -7  110.81    4.60
   0   4  -7    3.06    0.97
  -2   4  -7 1391.23   37.75
  -2   4  -7 1344.73   30.55
  -4   4  -7  385.17    9.56
  -6   4  -7   58.77    2.59
  -8   4  -7   24.29    1.39
  -8   4  -7   26.17    1.56
  -8   4  -7   27.19    1.97
 -10   4  -7   45.78    2.78
 -10   4  -7   46.52    1.97
 -10  -4  -7   44.91    3.23
 -12   4  -7    1.32    0.73
 -12   4  -7    2.93    1.26
 -12  -4  -7    0.88    1.29
 -14   4  -7    1.47    0.77
 -16   4  -7    0.96    0.81
 -16  -4  -7   -0.34    0.77
 -16   4  -7    0.71    0.82
 -18   4  -7    8.01    1.28
 -18   4  -7    7.51    1.20
 -18  -4  -7    9.50    1.23
 -20  -4  -7   19.02    1.56
 -20   4  -7   17.73    1.55
 -21   5   7   35.73    2.11
 -21  -5   7   36.28    1.63
 -21   5   7   38.32    1.68
 -19  -5   7   42.74    1.88
  19  -5  -7   40.15    4.75
 -19   5   7   42.84    2.36
 -19   5   7   41.77    1.81
 -17  -5   7    1.50    0.74
  17   5  -7    0.70    2.95
 -17   5   7    1.58    0.94
 -17   5   7    0.90    0.67
  17  -5  -7   -0.64    1.93
  15  -5  -7    2.99    1.77
  15   5  -7    0.92    2.49
  13   5  -7  223.75    9.97
 -11   5   7  144.00    4.90
  11   5  -7  124.25    6.73
   9   5  -7   36.27    3.71
  -9   5   7   39.96    2.15
   7   5  -7  255.03    9.11
  -7   5   7  256.97    6.87
  -5   5   7  111.52    3.41
   5   5  -7  109.96    4.90
  -3   5   7    3.07    0.61
   3   5  -7    2.73    1.01
   1   5  -7 2116.56   46.53
  -1   5   7 2173.11   46.72
   1   5  -7 2025.08   57.39
  -1   5  -7  810.97   22.67
  -1   5  -7  766.01   17.86
  -3   5  -7 2342.82   62.14
  -3   5  -7 2248.58   50.89
  -5   5  -7    8.99    1.14
  -7   5  -7   93.53    2.99
  -7   5  -7   92.59    3.65
  -9   5  -7  209.21    5.29
  -9   5  -7  205.87    4.79
  -9   5  -7  210.05    6.73
 -11   5  -7    8.77    1.61
 -11  -5  -7   12.46    2.14
 -11   5  -7    9.21    1.12
 -13   5  -7  177.32    4.75
 -15   5  -7   66.93    2.83
 -17   5  -7    0.22    0.79
 -17  -5  -7   -0.87    0.65
 -17   5  -7   -0.50    0.70
 -19  -5  -7  111.14    3.31
 -19   5  -7  119.88    3.40
 -21  -5  -7    8.68    0.97
 -22   6   7   20.84    1.56
  22   6  -7   21.83    3.03
 -22  -6   7   20.22    1.20
 -20  -6   7   56.50    2.03
 -20   6   7   56.53    2.67
  18   6  -7    2.55    2.80
 -18  -6   7    4.18    0.83
 -18   6   7    1.97    0.96
  18  -6  -7    3.11    2.29
  16  -6  -7  158.03    7.86
 -16   6   7  168.73    4.89
  16   6  -7  150.73    8.86
 -14   6   7  217.79    6.71
  14   6  -7  201.57    9.85
 -12   6   7  333.19    9.35
  12   6  -7  303.29   11.84
  10   6  -7  151.16    7.35
 -10   6   7  181.50    5.59
   8   6  -7    5.46    1.87
  -8   6   7    7.65    1.08
  -6   6   7  212.71    5.87
   6   6  -7  207.88    7.87
  -4   6   7   33.77    1.66
   4   6  -7   31.06    2.44
  -2   6   7  410.00    9.83
   2   6  -7  391.12   12.76
   0   6  -7 2912.25   77.08
   0   6  -7 2780.29   62.65
  -2   6  -7   37.89    1.69
  -2   6  -7   40.92    2.55
  -4   6  -7   26.81    1.63
  -6   6  -7  611.27   11.97
  -6   6  -7  598.60   14.86
  -8   6  -7    3.46    0.92
  -8   6  -7    2.21    0.71
  -8   6  -7    2.21    1.08
 -10   6  -7   78.44    2.68
 -10   6  -7   75.16    3.64
 -12   6  -7  497.25   14.03
 -12   6  -7  521.62   10.03
 -12  -6  -7  493.73   14.88
 -14   6  -7    3.61    0.95
 -16  -6  -7   55.72    2.33
 -16   6  -7   54.03    2.60
 -16   6  -7   53.15    2.78
 -18  -6  -7    3.55    0.96
 -20  -6  -7   12.60    1.20
  21   7  -7   10.53    2.64
 -21   7   7   11.64    1.35
 -21  -7   7   13.23    1.07
 -19  -7   7    4.41    0.83
 -19   7   7    4.14    1.14
  17  -7  -7   86.88    5.99
 -17  -7   7   80.38    2.56
 -17   7   7   82.66    3.40
  17   7  -7   83.34    6.89
 -15   7   7   37.36    2.69
  15   7  -7   40.81    5.16
  13   7  -7  552.91   17.81
  11   7  -7  106.22    6.69
 -11   7   7  117.67    4.51
   9   7  -7    4.18    1.85
  -9   7   7    4.76    1.02
  -7   7   7    2.88    0.91
   7   7  -7    4.28    1.85
   5   7  -7  364.86   12.36
  -5   7   7  383.43    9.55
  -3   7   7  608.60   14.04
   3   7  -7  561.58   17.81
   1   7  -7  148.18    4.33
   1   7  -7  144.79    5.93
  -1   7   7  152.34    4.47
  -1   7  -7   59.66    2.26
  -1   7  -7   61.27    3.31
  -3   7  -7   25.24    1.54
  -5   7  -7  326.41    7.05
  -5   7  -7  316.82    8.55
  -7   7  -7   14.59    1.61
  -7   7  -7   14.51    1.31
  -9   7  -7   39.44    1.78
  -9   7  -7   36.71    1.93
  -9   7  -7   38.69    2.51
 -11   7  -7  129.62    3.74
 -11   7  -7  123.93    5.21
 -13   7  -7   32.96    1.95
 -13   7  -7   35.01    1.99
 -15   7  -7   16.75    1.59
 -15   7  -7   16.30    1.80
 -17   7  -7   34.54    2.23
 -17   7  -7   30.62    2.02
 -17  -7  -7   29.46    1.78
 -19  -7  -7    3.17    0.87
  20   8  -7    3.23    2.28
 -20   8   7    2.82    1.02
  18   8  -7    3.64    2.75
 -18   8   7    2.84    1.03
  18  -8  -7    3.93    2.29
 -16   8   7   67.66    3.74
  16  -8  -7   66.33    5.20
  16   8  -7   72.00    6.35
 -16   8   7   73.43    3.19
  14   8  -7   35.73    4.59
 -14   8   7   39.15    2.75
  12   8  -7   29.95    4.10
 -12   8   7   24.54    2.26
 -10   8   7    4.83    1.14
  10   8  -7    1.54    1.87
  -8   8   7    4.97    1.17
   8   8  -7    6.20    2.34
  -6   8   7  228.59    6.44
   6   8  -7  211.19    7.61
  -4   8   7  550.84   13.48
   2   8  -7  161.02    6.61
  -2   8   7  170.12    5.01
   0   8  -7  449.38   14.16
   0   8  -7  446.75   10.99
  -2   8  -7   57.68    3.23
  -2   8  -7   57.39    2.35
  -4   8  -7  190.71    4.72
  -4   8  -7  191.89    5.65
  -6   8  -7   22.13    1.68
  -6   8  -7   16.28    1.38
  -8   8  -7   31.61    2.19
  -8   8  -7   32.35    1.85
  -8   8  -7   30.90    1.60
 -10   8  -7   19.34    1.59
 -10   8  -7   20.01    1.48
 -10   8  -7   21.16    2.08
 -12   8  -7   36.99    2.04
 -14   8  -7   24.96    2.00
 -14   8  -7   23.26    1.74
 -16  -8  -7    8.56    1.12
 -16   8  -7    9.83    1.45
 -16   8  -7    9.94    1.38
 -18   8  -7   -0.11    0.86
 -18  -8  -7   -0.14    0.75
 -20  -8  -7    0.71    0.61
  21   9  -7   10.61    2.39
 -21   9   7   10.78    1.27
  19   9  -7   18.38    3.30
 -19   9   7   14.47    1.59
  17  -9  -7  100.85    6.49
  17   9  -7  113.23    7.36
 -17   9   7  103.85    3.86
  17   9  -7  105.54    6.50
 -15   9   7    1.58    1.16
  15   9  -7    2.43    2.74
 -15   9   7    1.18    0.91
  13   9  -7  546.27   17.66
 -13   9   7  563.59   13.90
 -11   9   7  563.43   14.79
  11   9  -7  549.63   17.07
  -9   9   7  135.99    4.85
   9   9  -7  125.44    6.35
   7   9  -7  105.51    5.55
  -7   9   7  107.37    4.08
   5   9  -7  220.64    7.62
  -5   9   7  239.03    6.79
  -3   9   7   96.04    3.55
  -1   9   7 1649.85   36.65
   1   9  -7 1563.25   45.01
  -1   9  -7  474.86   14.92
  -1   9  -7  465.78   11.68
  -3   9  -7   10.41    1.02
  -3   9  -7    9.60    1.19
  -5   9  -7    2.62    0.88
  -5   9  -7    3.16    0.80
  -7   9  -7  250.46    7.62
  -7   9  -7  256.93    6.23
  -9   9  -7    5.35    1.26
  -9   9  -7    2.16    0.70
  -9   9  -7    0.16    0.63
 -11   9  -7  338.11    7.26
 -13   9  -7   32.15    1.97
 -15   9  -7  180.72    5.08
 -15   9  -7  187.78    5.51
 -17   9  -7    1.11    1.06
 -17   9  -7    1.31    0.95
 -19   9  -7   36.49    2.22
  20  10  -7   84.95    5.12
 -20  10   7   84.84    3.21
  18  10  -7    3.66    2.33
 -18  10   7    0.24    0.85
 -16  10   7   32.38    2.72
  16  10  -7   30.21    4.49
  16  10  -7   34.24    4.23
 -16  10   7   30.93    2.25
  14  10  -7    2.07    2.52
 -14  10   7    2.00    0.97
  14  10  -7    1.24    2.09
 -14  10   7    1.73    1.15
  12  10  -7  246.74   10.25
  12  10  -7  242.70    9.37
  10  10  -7  147.48    7.15
 -10  10   7  147.45    5.50
  -8  10   7  116.48    4.49
   8  10  -7  111.97    5.69
   6  10  -7   42.38    3.72
  -6  10   7   43.27    2.57
   4  10  -7 1033.19   24.85
  -4  10   7 1069.98   24.82
  -2  10   7  291.90    8.06
   2  10  -7  278.32    8.24
   0  10  -7  599.96   14.71
  -2  10  -7  640.78   12.54
  -2  10  -7  639.74   15.60
  -2  10  -7  631.32   15.38
  -4  10  -7    7.78    1.22
  -4  10  -7    6.36    1.18
  -4  10  -7    7.22    1.03
  -6  10  -7    2.17    0.73
  -6  10  -7    2.54    0.99
  -8  10  -7    6.23    1.15
  -8  10  -7    8.89    1.57
 -10  10  -7   77.90    4.03
 -12  10  -7  275.01    6.49
 -14  10  -7    0.77    0.80
 -14  10  -7    0.74    0.95
 -16  10  -7    7.41    1.38
 -16  10  -7    8.25    1.26
 -18  10  -7   36.18    2.32
 -19  11   7   43.49    2.43
  19  11  -7   45.51    4.04
 -17  11   7   18.64    2.32
 -17  11   7   18.43    1.81
  17 -11  -7   18.89    3.48
  17  11  -7   21.27    3.91
  17  11  -7   19.61    3.31
  15  11  -7    0.71    2.07
  15  11  -7    0.07    2.38
 -15  11   7   -0.15    0.86
 -15  11   7    0.83    1.18
  13  11  -7    1.87    2.30
  13  11  -7    3.53    2.16
 -13  11   7    3.99    1.36
  11  11  -7   14.73    2.93
   9  11  -7  110.43    5.92
  -9  11   7  116.06    4.71
   7  11  -7   12.30    2.26
  -7  11   7   13.92    1.70
   5  11  -7  423.37   12.04
  -5  11   7  421.48   11.34
   3  11  -7  117.32    4.77
  -3  11   7  120.60    4.42
   1  11  -7    1.92    0.92
  -1  11   7    0.99    0.89
  -1  11  -7  129.97    4.70
  -1  11  -7  134.86    4.60
  -3  11  -7   40.21    2.49
  -3  11  -7   41.73    2.50
  -5  11  -7    3.93    1.11
  -5  11  -7    2.65    0.76
  -7  11  -7   42.35    2.75
  -9  11  -7    5.74    1.48
 -11  11  -7   22.27    2.20
 -11  11  -7   19.08    1.62
 -13  11  -7    0.18    1.09
 -13  11  -7    0.68    0.89
 -15  11  -7    1.68    1.00
 -17  11  -7    4.66    1.28
 -19  11  -7   57.71    2.63
  20  12  -7    5.06    1.86
 -20  12   7    4.70    1.04
 -18  12   7   20.87    1.89
  18  12  -7   25.17    3.31
  16  12  -7    3.17    2.15
  16  12  -7    3.12    2.52
 -16  12   7    1.90    1.28
 -16  12   7    3.03    1.07
 -14  12   7  152.29    4.84
  14  12  -7  162.24    7.59
  14  12  -7  173.83    8.58
 -14  12   7  164.50    6.10
 -12  12   7    6.29    1.55
  12  12  -7    3.99    2.51
  12  12  -7    4.38    2.05
  10  12  -7   44.52    4.26
 -10  12   7   38.44    2.80
   8  12  -7    5.11    2.00
  -8  12   7    5.18    1.37
   6  12  -7   87.22    4.69
  -6  12   7   86.72    3.88
   4  12  -7   27.68    2.56
  -4  12   7   25.30    2.03
  -2  12   7  252.42    7.69
   2  12  -7  252.56    7.83
   0  12  -7  301.07    8.69
  -2  12  -7  314.86    8.91
  -2  12  -7  311.88    8.91
  -4  12  -7   30.36    2.24
  -4  12  -7   32.67    2.30
  -6  12  -7  117.47    4.75
  -8  12  -7    9.83    1.76
 -10  12  -7    2.36    1.22
 -12  12  -7   45.65    2.35
 -12  12  -7   46.18    2.67
 -12  12  -7   45.16    3.04
 -14  12  -7    3.21    1.33
 -14  12  -7    2.87    1.09
 -16  12  -7    0.78    1.01
 -18  12  -7    1.00    0.96
 -19  13   7    7.24    1.22
  19  13  -7    6.26    2.05
 -17  13   7    3.40    1.42
  17  13  -7    0.81    1.87
 -17  13   7    2.80    1.03
  15  13  -7  250.32   10.26
 -15  13   7  224.99    6.26
 -15  13   7  229.57    7.71
  15  13  -7  252.38    9.46
  13  13  -7   48.70    4.75
  13  13  -7   41.20    4.04
 -13  13   7   40.90    3.11
 -11  13   7  100.66    4.51
  11  13  -7  101.70    6.15
  11  13  -7  104.87    5.64
  -9  13   7   63.99    3.65
   9  13  -7   71.37    4.73
   7  13  -7  470.91   13.68
  -7  13   7  449.31   12.79
   5  13  -7  106.66    5.04
  -5  13   7  101.76    4.42
   3  13  -7   63.54    3.59
  -3  13   7   68.95    3.46
   1  13  -7  304.68    9.00
  -1  13  -7   12.88    1.64
  -3  13  -7  166.30    5.76
  -3  13  -7  156.61    5.66
  -5  13  -7  395.78   11.30
  -7  13  -7  576.82   15.63
 -11  13  -7    2.40    0.91
 -11  13  -7    0.30    1.06
 -11  13  -7    0.75    0.90
 -13  13  -7   49.88    2.83
 -13  13  -7   52.83    3.34
 -15  13  -7    0.93    1.04
 -17  13  -7   20.02    1.97
 -18  14   7   60.96    2.80
  18  14  -7   69.38    4.43
  16  14  -7  115.03    6.01
 -16  14   7  107.73    4.82
 -16  14   7  104.97    3.82
  14  14  -7   19.83    3.08
 -14  14   7   22.47    2.43
  14  14  -7   20.47    3.55
  12  14  -7  118.00    6.65
 -12  14   7  120.61    5.07
  12  14  -7  113.40    6.00
 -10  14   7   95.69    4.37
  10  14  -7   95.72    5.74
  10  14  -7   94.53    5.25
   8  14  -7   59.28    4.28
   6  14  -7  994.56   24.47
  -6  14   7  965.86   24.39
  -4  14   7   93.93    4.39
   4  14  -7  104.08    4.83
   2  14  -7   61.15    3.56
  -2  14   7   60.06    3.38
   0  14  -7   27.72    2.42
  -2  14  -7   70.11    3.63
  -4  14  -7   93.90    4.28
  -6  14  -7 1354.50   32.75
 -10  14  -7   39.96    2.89
 -10  14  -7   41.21    2.50
 -10  14  -7   40.84    2.28
 -12  14  -7    1.03    0.99
  12  14   7    0.53    0.88
 -12  14  -7   -0.62    1.08
 -14  14  -7   12.20    1.68
 -14  14  -7   14.11    2.04
  14  14   7   13.51    1.35
 -16  14  -7  115.00    4.17
  16  14   7  123.74    3.39
 -17  15   7   62.41    2.80
  17  15  -7   71.03    4.51
 -17  15   7   60.91    3.54
  15  15  -7   78.32    5.02
 -15  15   7   78.90    4.19
 -13  15   7   21.50    2.41
  13  15  -7   24.56    3.51
  13  15  -7   20.85    2.97
  11  15  -7   44.56    4.19
  11  15  -7   41.99    3.73
 -11  15   7   45.56    3.16
  -9  15   7   29.96    2.55
   9  15  -7   30.37    3.23
   9  15  -7   29.96    3.49
   7  15  -7   81.75    4.74
   7  15  -7   71.95    4.11
  -5  15   7   98.48    4.69
   5  15  -7  104.44    5.03
   3  15  -7    1.82    1.19
  -3  15   7    0.33    1.13
   1  15  -7  129.08    5.36
  -1  15  -7  150.32    5.80
  -3  15  -7   -0.38    0.83
  -5  15  -7    2.72    3.48
  -9  15  -7    1.30    1.14
  -9  15  -7   -0.62    2.94
  -9  15  -7    2.31    1.02
 -11  15  -7   12.43    1.96
  11  15   7   11.38    1.24
 -11  15  -7   11.90    1.62
  13  15   7   20.64    1.65
 -13  15  -7   21.04    2.07
 -13  15  -7   21.57    2.34
 -15  15  -7   33.06    2.70
 -15  15  -7   33.41    2.35
 -17  15  -7   45.82    2.53
  18  16  -7   44.41    3.36
  16  16  -7   26.82    3.21
 -16  16   7   23.32    2.50
 -14  16   7   33.53    2.83
  14  16  -7   31.64    3.53
  12  16  -7    5.39    1.97
  12  16  -7    5.57    2.21
 -12  16   7    4.83    1.47
 -10  16   7  106.34    4.77
  10  16  -7  104.81    5.45
  10  16  -7  108.22    6.00
  -8  16   7    3.67    1.30
   8  16  -7    1.69    1.69
   8  16  -7    1.78    1.43
  -8  16   7   -0.32    2.90
   6  16  -7  267.75    8.63
   6  16  -7  257.56    9.10
   2  16  -7    0.94    1.14
   0  16  -7    5.59    1.53
  -2  16  -7   -0.18    1.01
  -2  16  -7   -1.29    2.84
  -4  16  -7   64.95    3.51
  -4  16  -7   69.06    3.82
  -8  16  -7    4.65    1.26
  -8  16  -7    5.36    1.49
  -8  16  -7   -1.27    3.14
 -10  16  -7   27.87    2.59
 -10  16  -7   27.08    2.25
 -12  16  -7   49.87    2.80
 -12  16  -7   45.06    3.19
 -14  16  -7   17.48    1.93
 -14  16  -7   19.40    2.30
 -16  16  -7    4.29    1.22
  17  17  -7   51.11    3.54
 -17  17   7   50.94    3.05
  15  17  -7   39.86    3.55
 -15  17   7   41.08    3.03
 -13  17   7   -0.09    1.13
  13  17  -7    0.83    1.58
  11  17  -7   85.06    4.85
  11  17  -7   81.25    5.16
 -11  17   7   81.72    4.20
  -9  17   7   30.36    2.67
   9  17  -7   30.15    3.30
   9  17  -7   27.27    3.02
   7  17  -7  319.68   10.46
   7  17  -7  288.45    9.55
  -7  17   7  307.55    9.12
   5  17  -7  628.62   17.00
   5  17  -7  622.00   16.05
   3  17  -7    4.27    1.54
  -3  17   7   -0.79    2.49
   3  17  -7    6.75    1.58
  -1  17  -7   13.63    2.08
  -3  17  -7    1.05    3.29
   3  17   7   -1.39    2.48
  -3  17  -7    5.21    1.48
  -3  17  -7   -0.63    0.91
  -7  17  -7  462.65   10.58
  -7  17  -7  482.22   12.76
  -9  17  -7   35.20    2.41
  -9  17  -7   34.97    2.84
 -11  17  -7   42.70    3.04
 -11  17  -7   40.29    2.58
 -13  17  -7   14.05    2.07
 -13  17  -7   13.11    1.68
 -15  17  -7   16.58    2.06
 -15  17  -7   13.04    1.61
 -16  18   7   79.94    3.90
  16  18  -7   85.44    4.46
 -14  18   7   32.93    2.76
  14  18  -7   35.82    3.33
  12  18  -7    2.24    1.66
 -12  18   7    0.60    1.16
 -10  18   7   23.06    2.35
  10  18  -7   21.93    2.75
  10  18  -7   22.20    3.04
  -8  18   7    1.73    1.24
   8  18  -7    2.50    1.49
  -8  18   7   -2.35    2.75
   8  18  -7    1.59    1.60
   6  18  -7  407.16   12.44
   6  18  -7  399.28   11.69
   4  18  -7   71.53    4.02
   4  18  -7   68.20    4.20
   2  18  -7   13.42    2.19
   2  18  -7   12.93    1.95
   0  18  -7    2.50    1.23
   0  18  -7    2.13    1.25
   0  18  -7   -1.94    3.03
   0  18   7   -0.83    2.80
  -8  18  -7   14.87    1.75
  -8  18  -7   14.68    2.06
 -10  18  -7   86.30    4.30
 -10  18  -7   84.44    3.57
 -12  18  -7    4.10    1.22
 -12  18  -7    5.33    1.55
 -14  18  -7   26.45    2.07
 -14  18  -7   28.90    2.49
  15  19  -7   49.01    3.45
 -15  19   7   46.08    2.97
  13  19  -7   -0.51    1.33
 -13  19   7   -0.26    1.15
  11  19  -7    0.47    1.44
 -11  19   7   -0.64    1.07
   9  19  -7   -0.03    1.28
  -9  19   7   -1.38    2.83
   9  19  -7    0.44    1.38
  -9  19   7    0.61    1.13
   7  19  -7   26.34    3.02
   7  19  -7   25.33    2.83
  -7  19   7   24.88    2.51
   5  19  -7  106.43    5.39
   5  19  -7  110.08    5.17
   3  19  -7   17.27    2.34
   3  19  -7   18.00    2.32
   1  19  -7    4.17    1.58
   1  19  -7    0.49    3.40
   1  19  -7    3.67    1.40
  -1  19   7   -1.28    3.12
  -3  19  -7    1.97    1.17
   3  19   7   -1.19    2.98
  -3  19  -7   -1.12    3.25
  -5  19  -7   -0.75    3.38
  -5  19  -7    2.74    1.31
  -7  19  -7    8.39    1.71
  -7  19  -7   -1.06    3.08
  -9  19  -7    2.46    1.10
  -9  19  -7    0.13    3.16
  -9  19  -7    3.92    1.40
 -11  19  -7   11.57    1.62
 -11  19  -7   12.29    1.97
 -13  19  -7    0.11    1.06
 -13  19  -7    1.53    1.01
 -14  20   7    0.13    1.09
  14  20  -7    0.27    1.29
  12  20  -7    2.36    1.53
 -12  20   7    1.70    1.31
 -10  20   7    9.71    1.83
  10  20  -7   14.32    2.35
   8  20  -7   18.38    2.56
   8  20  -7   15.44    2.36
  -8  20   7   14.93    2.05
   6  20  -7    0.43    1.39
   6  20  -7    1.25    1.32
  -6  20   7   -0.70    2.93
   4  20  -7   71.91    4.43
   4  20  -7   75.32    4.25
   2  20  -7   29.55    2.81
   2  20  -7   31.67    3.07
  -4  20  -7   -0.05    3.48
  -4  20  -7   10.10    1.86
  -8  20  -7    1.02    1.23
  -8  20  -7    0.20    3.22
 -10  20  -7    9.46    1.50
 -10  20  -7    8.51    1.72
 -12  20  -7   40.68    2.40
 -12  20  -7   37.03    2.74
 -13  21   7   57.06    3.23
  11  21  -7   22.98    2.70
 -11  21   7   20.96    2.31
  -9  21   7   19.65    2.27
   9  21  -7   24.35    2.73
   7  21  -7    6.23    1.72
  -7  21   7   -1.60    2.93
   5  21  -7   70.51    4.40
   5  21  -7   80.59    4.34
   3  21  -7    4.21    1.56
   3  21  -7    2.93    1.57
  -3  21   7   -0.47    3.29
   3  21   7   -0.32    3.07
  -3  21  -7    0.47    3.44
  -5  21  -7   -0.19    3.30
  -5  21  -7    2.18    1.27
  -7  21  -7   -0.50    3.30
  -7  21  -7    5.07    1.56
  -9  21  -7    1.10    1.17
  -9  21  -7   -0.16    3.00
 -11  21  -7   85.91    3.40
 -11  21  -7   85.41    4.08
  12  22  -7  119.12    5.10
 -12  22   7  113.37    4.67
 -10  22   7  146.77    5.64
  10  22  -7  152.20    6.10
  -8  22   7   -0.14    3.21
   8  22  -7    4.20    1.58
   2  22   7   -0.25    3.27
  -2  22  -7   -0.69    3.27
  -8  22  -7    2.39    1.28
  -8  22  -7   -0.04    3.23
 -10  22  -7    2.20    3.43
  -9  23   7   -3.12    2.75
   9  23  -7    3.61    1.45
  -5  23   7   -1.16    3.15
   5  23  -7    1.66    1.32
   1  23   7    0.72    3.69
  -1  23  -7   -0.29    3.63
  -1  23  -7   10.08    1.88
  -3  23  -7   -1.08    3.37
  -3  23  -7   -0.17    1.17
  -7  23  -7    9.46    1.78
  -7  23  -7   -0.54    3.27
  -6  24   7   -0.73    3.09
   6  24  -7    0.40    1.23
  -2  24   7   -1.56    3.02
   2  24  -7    9.52    1.90
  -2  24  -7    1.36    1.22
  -2  24  -7   -0.02    3.61
   2  24   7   -1.75    3.13
  -4  24  -7    0.12    3.60
  -4  24  -7    7.09    1.63
  -6  24  -7    6.81    1.53
  -6  24  -7    0.54    3.31
  -8  24  -7    0.39    1.04
   5  25  -7   13.39    1.97
   3  25  -7    0.24    1.13
  -3  25   7   -0.68    2.93
  -1  25  -7    1.57    3.70
   1  25   7   -0.10    3.29
  -3  25  -7    1.52    3.61
  -3  25  -7    0.73    1.09
   2  26  -7   38.06    2.74
   0  26  -7   85.06    3.99
 -22   0   8    2.95    0.88
 -22   0   8    2.41    0.72
 -20   0   8   24.24    1.83
 -20   0   8   24.84    1.53
 -18   0   8  162.60    4.60
  18   0  -8  148.33    8.65
  16   0  -8   16.19    3.46
  14   0  -8   -0.98    1.81
  12   0  -8    0.42    1.40
  10   0  -8  394.65   11.91
  -8   0   8  793.65   13.90
  -6   0   8 1269.36   21.38
   6   0  -8 1266.80   35.44
   4   0  -8  297.74    9.55
   2   0  -8 1819.55   49.50
   0   0  -8 1681.30   45.86
  -2   0  -8   50.72    2.50
  -4   0  -8  435.62   12.62
  -4   0  -8  413.75   10.73
  -6   0  -8  381.65   10.17
  -8   0  -8   54.47    2.91
 -10   0  -8  432.25    8.41
 -10   0  -8  428.17   12.04
 -12   0  -8  206.56    7.39
 -12   0  -8  203.87    5.00
 -14   0  -8  130.38    3.93
 -16   0  -8  131.33    3.75
 -16   0  -8  122.20    3.95
 -18   0  -8  140.72    3.88
 -18   0  -8  135.02    4.25
 -20   0  -8   47.46    2.16
 -21   1   8    6.66    1.16
 -21  -1   8    4.72    0.87
 -21   1   8    5.48    0.91
 -21  -1   8    8.69    1.17
  19  -1  -8    0.86    2.44
  19   1  -8    4.50    2.86
 -19   1   8    0.83    0.66
 -19  -1   8    1.33    0.68
 -19   1   8    1.93    0.86
 -19  -1   8    1.56    0.83
 -17  -1   8   14.57    1.50
 -17   1   8   14.85    1.55
  17   1  -8   11.80    3.39
  17  -1  -8   13.68    3.39
  15   1  -8   17.93    3.50
  15  -1  -8   17.80    3.29
  13   1  -8    5.64    2.12
  13  -1  -8    9.03    2.19
  11   1  -8    9.55    2.17
  11  -1  -8   10.58    2.09
  -9  -1   8  127.16    3.20
   9   1  -8  122.67    5.60
   7  -1  -8 1296.20   35.63
   7   1  -8 1278.57   35.80
  -7   1   8 1280.80   21.53
  -7  -1   8 1238.21   21.56
   5  -1  -8    5.22    1.09
   5   1  -8    4.81    1.15
   3   1  -8   71.41    3.35
   3  -1  -8   70.80    3.17
   1  -1  -8   35.05    2.06
   1   1  -8   33.12    2.13
  -1   1  -8  149.89    5.36
  -3   1  -8   91.47    3.67
  -3   1  -8   89.08    2.97
  -5   1  -8  637.01   15.43
  -7   1  -8  133.87    4.66
  -7  -1  -8  131.02    4.83
  -9  -1  -8  282.48    6.02
  -9   1  -8  290.76    8.72
  -9  -1  -8  303.27    9.02
  -9   1  -8  288.76    6.12
 -11  -1  -8   59.43    2.37
 -11   1  -8   61.55    3.46
 -11  -1  -8   58.38    3.48
 -11   1  -8   65.68    2.50
 -13  -1  -8  143.78    4.03
 -13   1  -8  139.31    4.07
 -15  -1  -8   78.86    3.02
 -15   1  -8   84.30    3.14
 -17   1  -8   14.78    1.60
 -17  -1  -8   14.11    1.46
 -17  -1  -8   16.25    1.57
 -17   1  -8   14.87    1.47
 -19  -1  -8    4.25    1.05
 -19   1  -8    3.23    1.02
 -21  -1  -8    9.46    1.10
 -21   1  -8   10.02    1.09
 -22  -2   8    0.23    0.59
 -22   2   8    0.25    0.58
 -22   2   8   -0.37    0.70
 -20  -2   8   18.58    1.38
 -20  -2   8   17.22    1.59
 -20   2   8   17.41    1.30
 -20   2   8   13.53    1.45
  18  -2  -8    0.92    2.53
 -18  -2   8    1.85    0.75
 -18   2   8    1.07    0.68
  18   2  -8   -0.83    2.53
 -18   2   8    1.03    0.85
 -18  -2   8    0.73    0.78
  16   2  -8    1.46    2.48
  16  -2  -8    3.11    2.25
  14  -2  -8    5.38    2.23
  14   2  -8    3.94    2.66
  12   2  -8   19.86    3.08
  12  -2  -8   25.11    2.77
  10  -2  -8  137.23    5.71
  10   2  -8  118.23    6.06
  -6   2   8   40.73    1.41
  -6  -2   8   37.44    1.43
   6   2  -8   40.61    2.69
   6  -2  -8   44.59    2.49
   4   2  -8  159.17    6.02
   4  -2  -8  155.28    5.56
  -4   2   8  153.71    3.97
   2   2  -8  306.21    9.81
   0   2  -8   22.05    1.85
  -2   2  -8 1014.26   22.56
  -2   2  -8  990.30   27.94
  -4   2  -8    6.36    0.92
  -6   2  -8   17.01    1.49
  -8   2  -8    3.73    0.69
  -8   2  -8    4.19    0.89
  -8  -2  -8    5.11    1.33
  -8   2  -8    2.61    0.94
 -10   2  -8    4.54    0.83
 -10  -2  -8    2.00    1.17
 -10   2  -8    2.24    1.04
 -10  -2  -8    6.82    0.90
 -12   2  -8    6.98    1.07
 -12  -2  -8    8.68    1.07
 -12  -2  -8    7.46    1.71
 -12   2  -8    6.29    1.53
 -14  -2  -8    6.24    1.02
 -14   2  -8    6.68    1.12
 -16   2  -8   12.16    1.41
 -16  -2  -8   15.30    1.49
 -16  -2  -8   13.49    1.45
 -16   2  -8   14.79    1.53
 -18   2  -8   22.78    1.72
 -18   2  -8   19.91    1.74
 -18  -2  -8   18.44    1.62
 -18  -2  -8   19.10    1.66
 -20  -2  -8   -1.21    0.68
 -20   2  -8   -0.12    0.76
 -21   3   8   11.64    1.06
 -21   3   8    8.51    1.23
 -21  -3   8   10.31    1.04
  19   3  -8   21.35    4.23
 -19  -3   8   27.49    1.55
 -19   3   8   21.12    1.76
 -19   3   8   24.15    1.44
  19  -3  -8   20.60    3.89
 -17  -3   8   21.05    1.76
  17   3  -8   19.64    4.17
  17  -3  -8   24.63    3.95
 -17   3   8   22.01    1.88
  15  -3  -8    0.86    1.76
  15   3  -8    1.05    2.45
  13   3  -8   20.48    3.65
  13  -3  -8   26.95    3.23
  11  -3  -8   13.86    2.16
  11   3  -8   12.09    2.54
   9   3  -8   45.36    3.68
   7   3  -8  522.52   16.35
  -7  -3   8  534.47    9.76
  -7   3   8  533.12   12.62
  -7   3   8  523.74    9.47
   5   3  -8  412.20   12.85
  -5  -3   8  412.76    7.52
  -5   3   8  404.09    9.54
   5  -3  -8  377.43   12.06
   3   3  -8  238.38    8.13
  -3   3   8  227.59    5.69
   1   3  -8   36.62    2.37
  -1   3  -8  986.03   27.74
  -3   3  -8  101.70    3.19
  -3   3  -8   97.52    4.18
  -5   3  -8   98.88    3.43
  -7   3  -8    2.60    0.77
  -7   3  -8    3.94    0.96
  -9  -3  -8  128.36    3.39
  -9   3  -8  141.61    5.09
  -9   3  -8  136.00    3.60
  -9  -3  -8  134.19    5.44
 -11  -3  -8   48.76    3.26
 -11   3  -8   47.30    2.11
 -11   3  -8   43.70    2.89
 -11  -3  -8   50.16    2.03
 -13  -3  -8   94.77    3.10
 -13   3  -8  102.60    3.35
 -15   3  -8    7.47    1.22
 -15  -3  -8    7.68    1.14
 -17  -3  -8   31.79    1.98
 -17   3  -8   37.81    2.19
 -17   3  -8   36.76    2.03
 -19   3  -8   63.42    2.55
 -19  -3  -8   63.08    2.54
 -21  -3  -8    7.97    0.99
 -21   3  -8    7.86    0.99
 -22   4   8    0.22    0.57
 -22   4   8   -0.27    0.67
 -22  -4   8    0.65    0.58
 -20   4   8   28.56    1.52
 -20   4   8   31.97    2.09
 -20  -4   8   30.12    1.59
 -18   4   8   60.63    2.75
  18  -4  -8   55.69    5.21
  18   4  -8   56.74    5.87
 -18   4   8   60.71    2.17
 -18  -4   8   61.40    2.26
 -16   4   8    7.91    1.24
  16   4  -8    7.96    3.31
  16  -4  -8    7.07    2.48
  14   4  -8  147.91    8.33
  14  -4  -8  173.06    7.55
  12   4  -8   26.79    3.89
  10   4  -8    0.66    1.83
  -8   4   8  413.69   10.33
   8   4  -8  409.83   13.45
  -6   4   8    9.83    0.80
   6  -4  -8   11.28    1.21
  -6   4   8    7.48    0.87
   6   4  -8    9.37    1.51
  -6  -4   8    7.17    0.76
  -4  -4   8  116.45    2.91
  -4   4   8  114.96    3.37
   4   4  -8  116.97    5.16
  -2   4   8   55.32    1.95
   2   4  -8   56.25    3.13
   0   4  -8  152.13    5.77
  -2   4  -8  702.70   16.25
  -2   4  -8  711.88   20.52
  -4   4  -8    0.52    0.54
  -6   4  -8   61.75    2.73
  -8   4  -8   -0.01    0.65
  -8   4  -8    0.43    0.54
  -8   4  -8    0.30    0.78
 -10  -4  -8   18.53    2.24
 -10   4  -8   20.90    1.94
 -10   4  -8   26.83    1.54
 -12   4  -8  239.59    8.16
 -12  -4  -8  242.19    8.65
 -12   4  -8  254.15    5.86
 -14   4  -8    0.80    0.77
 -16   4  -8    3.03    0.98
 -16  -4  -8    4.09    1.03
 -16   4  -8    2.73    0.96
 -18  -4  -8   69.53    2.69
 -18   4  -8   75.43    2.78
 -18   4  -8   72.13    3.05
 -20  -4  -8   32.10    1.77
 -20   4  -8   29.82    1.78
 -21  -5   8    2.12    0.69
 -21   5   8    1.01    0.85
 -21   5   8    2.09    0.71
 -19   5   8   -0.51    0.76
 -19   5   8    0.37    0.60
 -19  -5   8   -0.29    0.56
 -17   5   8    1.38    0.93
 -17   5   8    0.16    0.62
  17   5  -8    1.03    2.92
 -17  -5   8    1.09    0.68
  17  -5  -8    1.12    2.14
  15  -5  -8   68.92    4.90
  15   5  -8   70.05    6.24
  13   5  -8  182.02    8.83
  11   5  -8   12.04    2.74
   9   5  -8    8.76    2.35
  -9   5   8    8.99    1.27
  -7   5   8    7.27    0.99
   7   5  -8    7.99    1.65
   5   5  -8    3.70    1.14
  -5   5   8    2.73    0.63
  -3   5   8    2.15    0.56
  -3  -5   8    1.62    0.52
   3   5  -8    2.76    1.05
  -1   5   8    5.44    0.78
   1   5  -8    5.54    1.24
  -1   5  -8  215.35    5.49
  -1   5  -8  217.60    7.72
  -3   5  -8  940.57   26.24
  -3   5  -8  906.60   21.14
  -5   5  -8  449.45   11.26
  -7   5  -8    8.97    1.08
  -7   5  -8    7.01    1.18
  -9   5  -8   84.63    2.76
  -9   5  -8   88.43    3.08
  -9   5  -8   92.42    3.91
 -11   5  -8  118.63    4.98
 -11   5  -8  123.31    3.65
 -11  -5  -8  118.41    5.57
 -13   5  -8  115.43    3.67
 -15   5  -8    7.38    1.22
 -17   5  -8    3.18    0.99
 -17   5  -8    2.93    0.95
 -17  -5  -8    1.71    0.83
 -19   5  -8    5.65    1.03
 -19  -5  -8    6.02    1.08
  22   6  -8    7.98    2.21
 -22  -6   8    5.71    0.78
 -22   6   8    5.00    0.96
 -20   6   8   32.66    2.09
 -20  -6   8   32.46    1.58
 -18   6   8    5.70    1.17
 -18  -6   8    6.65    0.92
  18  -6  -8    6.26    2.49
  18   6  -8    3.80    3.06
 -16   6   8   50.36    2.58
  16   6  -8   50.57    5.70
  16  -6  -8   48.04    4.50
  14   6  -8   49.07    5.52
 -14   6   8   52.85    3.03
  12   6  -8    0.91    2.03
 -10   6   8   20.11    1.70
  10   6  -8   18.87    3.09
   8   6  -8   62.18    4.47
  -8   6   8   74.88    2.93
  -6   6   8    1.72    0.69
   6   6  -8    2.71    1.18
   4   6  -8  220.05    8.47
  -4   6   8  239.97    6.24
  -4   6   8  240.53    4.75
   2   6  -8  374.99   12.26
  -2   6   8  378.66    9.30
   0   6  -8  226.70    8.08
  -2   6  -8  198.39    5.38
  -2   6  -8  207.40    7.33
  -4   6  -8  277.54    7.36
  -6   6  -8  658.76   13.03
  -6   6  -8  662.75   16.15
  -8   6  -8   13.49    1.27
  -8   6  -8   13.34    1.55
  -8   6  -8   13.08    1.16
 -10   6  -8    1.64    1.08
 -10   6  -8    1.33    0.68
 -12   6  -8    3.97    0.94
 -14   6  -8    0.66    0.73
 -16  -6  -8    0.24    0.79
 -16   6  -8    1.18    0.82
 -18  -6  -8   33.75    1.90
 -20  -6  -8    1.08    0.74
  21   7  -8   14.86    2.88
 -21  -7   8   18.14    1.21
 -21   7   8   17.14    1.60
 -19  -7   8    8.37    0.96
 -19   7   8    8.54    1.34
 -17  -7   8  138.50    3.45
  17   7  -8  141.06    8.54
  17  -7  -8  127.23    7.35
 -17   7   8  147.94    4.56
 -15   7   8    0.59    1.00
  15  -7  -8   -0.55    1.56
  15   7  -8    3.46    2.81
  13   7  -8  258.39   10.96
  11   7  -8  109.61    6.62
  -9   7   8   12.56    1.40
   9   7  -8   11.77    2.57
   7   7  -8   19.22    2.70
  -7   7   8   19.22    1.50
  -5   7   8  264.43    7.12
  -3   7   8   57.52    2.36
   3   7  -8   55.80    3.43
   1   7  -8 1278.47   36.81
  -1   7   8 1325.01   29.66
  -1   7  -8  230.48    6.13
  -1   7  -8  237.63    8.38
  -3   7  -8  304.09    7.88
  -5   7  -8    7.57    1.09
  -7   7  -8   13.02    1.38
  -7   7  -8   18.43    1.74
  -7   7  -8   13.82    1.26
  -9   7  -8   82.56    3.02
  -9   7  -8   77.90    3.70
  -9   7  -8   83.75    2.74
 -11   7  -8  320.46   10.03
 -11   7  -8  337.44    7.19
 -13   7  -8    5.87    1.07
 -13   7  -8    5.80    1.09
 -15  -7  -8   92.27    3.03
 -15   7  -8   98.86    3.66
 -15   7  -8   91.05    3.39
 -17  -7  -8    5.18    1.00
 -17   7  -8    5.65    1.25
 -17   7  -8    6.17    1.20
 -19  -7  -8   63.27    2.38
 -20   8   8   18.07    1.73
  20   8  -8   17.77    3.14
 -18   8   8   69.57    3.04
  18  -8  -8   61.40    5.36
  18   8  -8   73.46    6.12
 -16   8   8   51.10    2.66
  16  -8  -8   52.39    4.68
  16   8  -8   52.59    5.71
  14   8  -8  727.76   22.39
 -14   8   8  788.53   18.14
  12   8  -8  705.63   20.84
  10   8  -8   27.30    3.60
 -10   8   8   31.25    2.20
   8   8  -8  106.26    5.60
  -8   8   8  110.17    4.04
  -6   8   8    1.31    0.73
   6   8  -8    1.28    1.38
  -4   8   8    0.92    0.70
  -2   8   8 1158.31   26.38
   2   8  -8 1130.51   32.90
   0   8  -8 2312.43   63.48
  -2   8  -8  606.39   17.96
  -2   8  -8  573.48   14.12
  -4   8  -8  829.24   19.57
  -4   8  -8  822.54   15.81
  -6   8  -8  144.07    4.12
  -6   8  -8  140.84    4.86
  -8   8  -8  103.61    3.45
  -8   8  -8   99.03    2.98
  -8   8  -8   96.97    4.11
 -10   8  -8  268.06    6.66
 -10   8  -8  257.23    8.31
 -10   8  -8  253.44    5.86
 -12   8  -8  189.58    4.95
 -14   8  -8   97.13    3.71
 -14   8  -8   95.16    3.41
 -16  -8  -8   94.42    2.97
 -16   8  -8   99.52    3.77
 -16   8  -8   96.72    3.51
 -18  -8  -8   32.75    1.84
 -18   8  -8   38.21    2.32
 -20  -8  -8   80.45    2.39
  21   9  -8   37.27    3.54
 -21   9   8   34.04    1.97
  19   9  -8    3.58    2.31
 -19   9   8    3.91    1.13
  17   9  -8   -0.04    2.45
 -17   9   8    0.09    0.85
  17   9  -8    1.76    2.17
  17  -9  -8    1.60    1.96
 -15   9   8    3.65    1.03
  15   9  -8    3.26    2.80
 -15   9   8    2.43    1.20
  13   9  -8  125.03    7.57
 -13   9   8  128.94    5.02
 -11   9   8   61.22    3.30
  11   9  -8   58.82    5.12
   9   9  -8   15.69    2.72
  -9   9   8   16.65    1.68
   7   9  -8   12.48    2.27
  -7   9   8   10.06    1.40
  -5   9   8  132.31    4.47
   5   9  -8  128.26    5.45
  -3   9   8   23.56    1.70
  -1   9   8   47.41    2.40
  -1   9  -8   11.75    1.09
  -1   9  -8   12.79    1.88
  -3   9  -8  592.34   14.70
  -3   9  -8  612.14   12.01
  -5   9  -8    8.97    1.34
  -5   9  -8    8.60    1.18
  -7   9  -8    9.62    1.42
  -7   9  -8    9.20    1.24
  -9   9  -8   83.03    3.18
  -9   9  -8   82.48    3.91
  -9   9  -8   84.75    2.81
 -11   9  -8  104.69    3.38
 -13   9  -8    6.63    1.16
 -13   9  -8    8.42    1.38
 -13   9  -8    9.71    1.31
 -15   9  -8    9.34    1.44
 -15   9  -8    6.80    1.20
 -17   9  -8    5.42    1.23
 -19   9  -8   49.03    2.49
  20  10  -8    2.67    1.96
 -20  10   8    2.90    0.99
 -18  10   8    2.25    0.99
  18  10  -8    3.23    2.27
  16  10  -8   88.57    6.62
  16  10  -8   94.54    6.06
 -16  10   8   86.50    4.24
 -16  10   8   86.02    3.42
  16 -10  -8   73.67    5.60
  14  10  -8  190.24    9.39
 -14  10   8  192.60    6.55
  14  10  -8  186.39    8.50
 -14  10   8  187.63    5.38
  12  10  -8  154.30    7.35
  12  10  -8  163.31    8.19
  10  10  -8   63.20    5.09
 -10  10   8   66.06    3.47
  -8  10   8    6.99    1.33
   8  10  -8   11.69    2.36
  -6  10   8  590.65   14.86
   6  10  -8  581.15   15.81
   4  10  -8   88.19    4.23
  -4  10   8   87.42    3.54
  -2  10   8   51.00    2.57
   2  10  -8   46.21    2.77
   0  10  -8   86.34    3.69
   0  10  -8   89.96    2.80
  -2  10  -8  347.90    7.60
  -2  10  -8  348.83    9.35
  -4  10  -8  332.95    8.90
  -4  10  -8  313.83    7.28
  -4  10  -8  318.14    8.89
  -6  10  -8   36.58    2.38
  -6  10  -8   36.45    2.00
  -8  10  -8   81.79    3.12
  -8  10  -8   81.84    3.84
 -10  10  -8   10.54    1.42
 -10  10  -8   11.09    1.86
 -12  10  -8   15.90    1.55
 -12  10  -8   15.71    1.50
 -14  10  -8   10.68    1.54
 -14  10  -8   14.39    1.55
 -16  10  -8   20.65    1.97
 -16  10  -8   19.91    1.68
 -18  10  -8    4.02    1.12
 -19  11   8   54.56    2.65
  19  11  -8   56.52    4.40
  17  11  -8   39.14    4.24
 -17  11   8   37.82    2.32
  15  11  -8    7.91    2.65
 -15  11   8    5.69    1.27
 -15  11   8    5.34    1.55
  15  11  -8    4.31    2.99
 -13  11   8  226.54    7.28
  13  11  -8  218.76    9.86
  13  11  -8  223.37    9.08
  11  11  -8   17.58    3.22
  -9  11   8    5.79    1.46
   9  11  -8   11.11    2.67
   7  11  -8  296.91    9.93
  -7  11   8  294.94    8.75
   5  11  -8    8.56    1.73
  -5  11   8    8.70    1.39
  -3  11   8  102.02    4.06
   3  11  -8  103.62    4.58
   1  11  -8  150.91    5.37
  -1  11  -8  179.22    5.91
  -3  11  -8  122.43    3.70
  -3  11  -8  122.41    4.54
  -5  11  -8  155.66    4.46
  -5  11  -8  150.91    5.34
  -7  11  -8   63.74    3.35
  -7  11  -8   68.48    2.84
  -9  11  -8    2.79    1.21
 -11  11  -8  173.37    4.76
 -13  11  -8   27.81    2.28
 -15  11  -8   31.91    2.32
 -17  11  -8    6.31    1.31
 -19  11  -8   83.02    3.13
 -20  12   8   41.17    2.15
  20  12  -8   40.82    3.44
  18  12  -8   46.71    4.18
 -18  12   8   46.44    2.50
 -16  12   8    3.38    1.42
  16  12  -8    1.58    1.92
  16  12  -8    1.30    2.43
 -16  12   8    1.91    0.97
  14  12  -8   15.36    3.05
 -14  12   8   19.51    2.34
  14  12  -8   19.46    3.70
 -14  12   8   17.15    1.87
 -12  12   8    2.92    1.32
  12  12  -8    1.57    1.87
  12  12  -8    2.94    2.39
  10  12  -8    0.83    1.71
   8  12  -8   77.47    4.86
  -8  12   8   71.32    3.73
   6  12  -8  293.97    9.67
  -6  12   8  304.94    8.97
  -4  12   8    1.07    0.92
   4  12  -8    1.37    1.05
  -2  12   8    4.22    1.11
   2  12  -8    4.85    1.30
   0  12  -8   48.81    2.86
  -2  12  -8    4.86    1.15
  -4  12  -8    6.41    1.30
  -6  12  -8   41.40    2.72
  -8  12  -8   55.13    3.37
 -10  12  -8    1.12    0.78
 -12  12  -8   18.70    1.70
 -12  12  -8   15.95    1.74
 -14  12  -8    2.61    1.10
 -16  12  -8   13.29    1.67
 -18  12  -8   91.38    3.45
 -19  13   8   50.56    2.47
  19  13  -8   59.32    4.14
  17  13  -8   19.60    3.05
 -17  13   8   19.99    2.26
 -17  13   8   16.33    1.73
 -15  13   8  122.65    4.22
  15  13  -8  132.06    6.72
  15  13  -8  134.60    7.47
 -15  13   8  127.77    5.30
 -13  13   8   29.84    2.69
  13  13  -8   30.10    3.70
  13  13  -8   33.68    4.25
  11  13  -8    5.47    2.03
 -11  13   8    3.01    1.28
  11  13  -8    1.08    2.08
   9  13  -8   53.53    4.36
  -7  13   8  144.27    5.64
   7  13  -8  145.33    6.45
  -5  13   8   71.14    3.65
   5  13  -8   68.06    4.04
   3  13  -8   36.14    2.75
  -3  13   8   33.67    2.41
   1  13  -8  144.21    5.43
  -1  13  -8   64.40    3.32
  -3  13  -8   96.59    4.22
  -9  13  -8    0.83    3.05
  -9  13  -8    5.11    1.36
 -11  13  -8    0.41    0.84
 -11  13  -8   -0.07    1.03
 -11  13  -8    0.17    0.75
  13  13   8    3.02    0.96
 -13  13  -8    3.59    1.17
 -15  13  -8   11.77    1.64
  15  13   8   12.58    1.34
 -17  13  -8   54.86    2.81
  17  13   8   58.15    2.33
  18  14  -8    2.38    1.71
 -18  14   8    0.42    0.85
 -16  14   8    0.95    1.23
 -16  14   8   -0.08    0.86
  16  14  -8    2.43    1.88
  14  14  -8   86.53    5.90
 -14  14   8   85.81    4.27
  14  14  -8   86.15    5.32
  12  14  -8    8.58    2.33
  12  14  -8    9.05    2.73
 -12  14   8   10.33    1.83
 -10  14   8   16.55    2.03
  10  14  -8   16.90    3.09
  10  14  -8   16.92    2.66
   8  14  -8   -0.53    1.46
  -6  14   8   19.95    2.27
   6  14  -8   15.94    2.45
   4  14  -8    1.43    1.12
  -4  14   8    1.48    1.14
   2  14  -8   86.69    4.19
   0  14  -8    3.02    1.16
  -2  14  -8   21.72    2.05
  -4  14  -8   41.08    2.83
  -6  14  -8    1.25    3.27
 -10  14  -8   18.88    1.87
 -10  14  -8   16.55    1.71
 -10  14  -8   16.91    2.14
  12  14   8   64.39    2.46
 -12  14  -8   62.27    3.61
 -12  14  -8   61.06    3.10
 -14  14  -8   69.48    3.34
  14  14   8   69.87    2.62
 -16  14  -8   18.06    1.98
  16  14   8   20.08    1.59
  17  15  -8   17.44    2.69
 -17  15   8   17.29    1.73
 -17  15   8   19.97    2.26
  15  15  -8   20.67    3.07
 -15  15   8   22.09    2.44
  13  15  -8    7.27    2.21
 -13  15   8   11.76    1.93
  13  15  -8    8.71    2.64
 -11  15   8  265.40    8.38
  11  15  -8  267.95   10.22
  11  15  -8  264.63    9.40
   9  15  -8    9.21    2.15
  -9  15   8    8.75    1.67
   9  15  -8    8.40    2.28
   7  15  -8  616.94   16.20
   7  15  -8  641.52   17.45
   5  15  -8  326.91   10.27
  -5  15   8  306.58    9.89
   3  15  -8   12.67    2.01
  -3  15   8    9.73    1.78
   1  15  -8  185.64    6.72
  -1  15  -8   15.57    2.00
  -3  15  -8   83.26    4.10
  -5  15  -8    3.74    3.60
  -9  15  -8  195.31    6.72
  -9  15  -8  179.48    5.53
  11  15   8    1.65    0.87
 -11  15  -8    3.17    1.02
 -11  15  -8    3.08    1.14
 -11  15  -8    2.80    1.33
 -13  15  -8  192.28    5.86
  13  15   8  202.95    4.53
 -13  15  -8  203.31    7.01
 -15  15  -8   78.36    3.40
 -17  15  -8   23.66    1.91
  16  16  -8  154.13    6.65
 -16  16   8  148.91    5.73
  14  16  -8   55.91    4.27
 -14  16   8   54.59    3.51
  12  16  -8   72.66    4.70
 -12  16   8   75.17    4.00
  12  16  -8   82.35    5.34
 -10  16   8   56.91    3.44
  10  16  -8   50.10    3.94
  10  16  -8   54.04    4.37
   8  16  -8  279.17    9.88
   8  16  -8  272.28    9.14
   6  16  -8  550.05   15.53
   6  16  -8  547.76   14.57
   4  16  -8   71.46    4.13
   4  16  -8   62.13    3.59
  -2  16  -8    0.11    3.02
   2  16   8   -0.45    2.47
  -8  16  -8    1.91    1.04
  -8  16  -8    2.53    1.19
  -8  16  -8   -0.53    2.92
 -10  16  -8  200.91    6.00
 -10  16  -8  223.88    7.40
 -12  16  -8    1.46    1.07
 -12  16  -8    1.71    1.27
 -14  16  -8  140.13    4.68
 -16  16  -8   88.84    3.47
 -17  17   8   22.81    2.20
  17  17  -8   21.92    2.62
  15  17  -8   83.08    4.80
 -15  17   8   81.34    4.10
  13  17  -8    8.52    2.18
 -13  17   8    7.39    1.75
  11  17  -8   16.64    2.82
  11  17  -8   15.67    2.55
 -11  17   8   15.92    2.13
   9  17  -8   18.93    2.88
  -9  17   8   22.14    2.39
   9  17  -8   17.66    2.54
   7  17  -8   50.88    3.96
   7  17  -8   45.94    3.55
   5  17  -8    6.63    1.67
   5  17  -8    7.88    1.93
   3  17  -8   22.82    2.61
   3  17  -8   18.67    2.17
  -1  17  -8   -0.37    0.92
  -1  17  -8   -0.27    3.27
  -1  17  -8    2.21    1.24
   1  17   8    0.93    3.01
  -5  17  -8    2.61    1.24
  -5  17  -8   -0.96    3.18
  -7  17  -8   19.87    2.20
  -7  17  -8   15.81    1.75
  -9  17  -8   97.55    4.59
  -9  17  -8   91.85    3.77
 -11  17  -8   40.35    2.97
 -11  17  -8   35.15    2.48
 -13  17  -8    9.47    1.81
 -13  17  -8   12.27    1.64
 -15  17  -8   61.72    2.90
  16  18  -8   15.90    2.31
 -16  18   8   18.52    2.09
  14  18  -8   -1.20    1.32
 -14  18   8   -0.05    1.18
 -12  18   8   11.15    1.97
  12  18  -8   12.08    2.36
  10  18  -8    2.22    1.70
  10  18  -8    2.28    1.51
 -10  18   8    1.01    1.13
   8  18  -8   74.88    4.43
   8  18  -8   73.73    4.70
   6  18  -8   82.89    4.79
   6  18  -8   80.24    4.43
   4  18  -8   34.35    2.94
   4  18  -8   39.79    3.32
   2  18  -8    6.05    1.52
   2  18  -8    5.38    1.62
  -2  18  -8   11.06    1.99
  -2  18  -8   -0.84    3.15
   2  18   8   -0.56    2.97
  -2  18  -8    9.08    1.72
  -4  18  -8    1.16    1.12
  -4  18  -8    0.19    3.35
  -6  18  -8   40.46    2.57
  -6  18  -8   41.86    3.06
  -8  18  -8   -0.46    2.87
  -8  18  -8    2.58    1.11
  -8  18  -8    2.37    1.26
 -10  18  -8    1.12    1.14
 -10  18  -8    0.45    0.93
 -10  18  -8    0.40    3.20
 -12  18  -8    5.26    1.30
 -12  18  -8    6.14    1.53
 -14  18  -8    0.92    0.99
 -14  18  -8    0.39    1.10
 -15  19   8    5.45    1.49
  15  19  -8    4.67    1.66
  13  19  -8   17.70    2.53
 -13  19   8   18.11    2.23
 -11  19   8    1.64    1.26
  11  19  -8    2.86    1.65
   9  19  -8    5.81    1.88
   9  19  -8    5.84    1.82
   7  19  -8  137.68    6.38
   7  19  -8  143.55    6.13
   5  19  -8    6.01    1.69
   5  19  -8    6.39    1.94
   3  19  -8    2.56    1.27
   3  19  -8    2.32    1.45
  -3  19   8   -0.87    2.81
   3  19   8   -0.31    3.11
  -3  19  -8    0.81    1.07
  -3  19  -8   -1.10    3.26
  -5  19  -8   -0.27    3.29
  -5  19  -8    6.37    1.64
  -7  19  -8   45.56    2.72
  -7  19  -8   49.85    3.25
  -9  19  -8   21.42    2.28
  -9  19  -8   17.83    1.94
 -11  19  -8   60.28    3.52
 -11  19  -8   65.80    3.12
 -13  19  -8   43.25    2.49
 -13  19  -8   43.27    2.91
 -14  20   8   36.85    2.72
  14  20  -8   41.43    3.20
  12  20  -8   11.82    2.20
 -12  20   8   10.67    1.90
 -10  20   8    6.88    1.63
  10  20  -8    9.88    2.10
   8  20  -8   23.17    2.84
   8  20  -8   23.93    2.72
   6  20  -8   -0.02    1.33
   6  20  -8    0.80    1.26
  -6  20   8   -1.33    2.80
  -4  20   8   -0.42    3.04
   4  20  -8    2.24    1.61
   4  20  -8    1.51    1.34
   2  20  -8   33.09    3.16
   2  20  -8   33.91    2.99
   0  20  -8    3.17    1.56
   0  20   8   -0.98    3.43
   0  20  -8    0.97    4.14
   0  20  -8    4.09    1.47
  -4  20  -8    0.32    1.04
  -4  20  -8    0.09    3.57
  -6  20  -8   -0.69    2.99
  -6  20  -8    7.29    1.63
  -8  20  -8    2.28    1.12
  -8  20  -8    0.81    3.56
  -8  20  -8    1.85    1.33
 -10  20  -8   53.68    3.32
 -10  20  -8   52.81    2.83
 -12  20  -8   35.57    2.67
 -12  20  -8   36.70    2.30
  13  21  -8    6.59    1.71
 -13  21   8    5.34    1.40
  11  21  -8   29.77    2.94
   9  21  -8    5.84    1.79
  -9  21   8   -0.45    3.11
   5  21  -8    0.87    1.19
  -5  21   8    0.39    3.20
   5  21  -8    1.62    1.47
   3  21  -8   15.36    2.28
   3  21  -8   13.92    2.40
  -1  21   8    0.84    3.72
   1  21  -8    4.40    1.53
   1  21  -8    4.06    1.61
  -1  21  -8    4.76    1.51
  -1  21  -8    5.11    1.72
   1  21   8   -0.83    3.13
  -1  21  -8   -0.72    3.57
  -3  21  -8    0.62    3.42
   3  21   8    1.16    3.24
  -9  21  -8   37.67    2.85
  -9  21  -8   37.22    2.43
 -11  21  -8    6.92    1.52
 -11  21  -8    8.93    1.37
  12  22  -8   38.02    2.96
  10  22  -8    1.54    1.35
   8  22  -8    1.75    1.36
  -8  22   8   -0.13    2.99
   6  22  -8    8.69    1.88
  -6  22   8   -0.95    3.07
   2  22  -8    9.14    1.91
   2  22  -8    6.86    1.92
   2  22   8   -1.22    3.18
  -2  22  -8   -2.10    3.31
  -4  22  -8    9.88    1.84
  -4  22  -8   -0.57    3.45
  -8  22  -8    0.78    3.25
  -8  22  -8    4.22    1.38
 -10  22  -8   -0.78    2.76
 -10  22  -8    8.76    1.60
   9  23  -8    4.70    1.52
  -9  23   8   -1.18    2.91
  -7  23   8   -0.76    3.09
   7  23  -8    1.57    1.31
  -3  23   8   -0.67    3.49
   3  23  -8    4.38    1.58
   8  24  -8   -0.38    1.09
  -8  24   8    0.16    3.02
  -4  24   8   -0.98    3.04
   4  24  -8    6.25    1.67
  -2  24  -8    0.09    1.08
  -2  24  -8    1.79    3.71
   2  24   8    0.46    3.40
  -6  24  -8   14.53    1.95
  -6  24  -8    0.44    3.21
  -5  25   8   -1.18    2.72
   5  25  -8    2.63    1.23
   3  25  -8    9.29    1.79
  -3  25   8    0.28    3.08
  -3  25  -8   12.71    1.82
  -3  25  -8    0.65    3.32
  -5  25  -8   -0.27    2.99
 -22   0   9   -0.34    0.56
 -22   0   9   -0.55    0.66
 -20   0   9    0.97    0.86
 -20   0   9    0.59    0.62
 -18   0   9   -0.01    0.60
 -18   0   9    0.07    0.71
  18   0  -9    0.46    2.49
  16   0  -9    0.26    2.10
  14   0  -9   -0.78    1.95
  12   0  -9   -0.28    1.36
 -10   0   9   -0.24    0.60
  10   0  -9    0.51    1.76
  -8   0   9    0.03    0.46
   6   0  -9    0.47    0.78
  -6   0   9    1.16    0.41
   4   0  -9    2.63    0.91
   2   0  -9    2.83    0.95
   0   0  -9    0.21    0.69
  -2   0  -9    0.17    0.65
  -4   0  -9   -0.28    0.63
  -4   0  -9    2.07    0.84
  -6   0  -9    0.35    0.71
  -8   0  -9   -0.34    0.71
  -8   0  -9    0.57    0.91
 -10   0  -9    0.25    0.56
 -10   0  -9   -0.34    0.88
 -12   0  -9    0.77    1.20
 -12   0  -9    0.15    0.60
 -14   0  -9    1.18    0.82
 -16   0  -9    0.63    0.76
 -16   0  -9   -0.96    0.76
 -18   0  -9   -0.92    0.77
 -18   0  -9   -0.92    0.84
 -20   0  -9    1.26    0.81
 -21  -1   9   31.09    1.92
 -21   1   9   32.92    2.01
 -21  -1   9   34.05    1.67
 -21   1   9   33.87    1.65
 -19  -1   9   67.75    2.28
 -19  -1   9   66.42    2.72
  19   1  -9   59.13    5.73
  19  -1  -9   60.19    5.80
 -19   1   9   60.90    2.17
 -19   1   9   65.42    2.76
 -17   1   9   31.87    2.01
 -17  -1   9   30.78    1.99
  17   1  -9   34.90    4.74
  17  -1  -9   31.14    4.43
  15   1  -9    3.92    2.48
  15  -1  -9    3.05    2.17
  13  -1  -9    1.04    1.71
  13   1  -9    4.32    2.26
  11  -1  -9  110.97    5.44
  11   1  -9  109.16    5.79
   9  -1  -9   67.11    3.85
   9   1  -9   67.31    4.13
  -9  -1   9   63.51    2.14
  -9   1   9   63.53    2.07
   7  -1  -9 1345.18   38.64
  -7  -1   9 1382.27   23.43
   7   1  -9 1414.73   39.03
  -7   1   9 1394.22   23.37
  -5  -1   9    8.30    0.76
   5   1  -9    9.95    1.46
   5  -1  -9    8.51    1.22
  -5   1   9    9.86    0.83
   3  -1  -9 1099.45   31.22
   3   1  -9 1140.30   31.54
   1  -1  -9   11.84    1.35
   1   1  -9   11.06    1.41
  -1  -1  -9   89.93    3.76
  -1   1  -9   86.76    3.81
  -3   1  -9 1005.21   23.08
  -3   1  -9 1010.51   28.24
  -5   1  -9  303.05    8.18
  -7   1  -9   44.49    2.17
  -7  -1  -9   43.13    2.64
  -7   1  -9   45.88    2.54
  -9  -1  -9  510.78    9.66
  -9   1  -9  525.67   13.84
  -9  -1  -9  523.40   14.03
  -9   1  -9  512.68    9.73
 -11   1  -9    7.11    1.00
 -11   1  -9    8.54    1.61
 -11  -1  -9    7.69    1.61
 -11  -1  -9    8.23    1.04
 -13   1  -9  173.41    4.65
 -13  -1  -9  164.04    4.51
 -15   1  -9   88.49    3.28
 -15  -1  -9   90.27    3.23
 -17  -1  -9   54.37    2.54
 -17   1  -9   53.28    2.41
 -17   1  -9   53.12    2.59
 -17  -1  -9   53.61    2.42
 -19   1  -9    2.89    0.94
 -19  -1  -9    1.32    0.87
 -22   2   9    6.33    0.85
 -22  -2   9    6.41    0.87
 -22   2   9    6.08    1.03
 -20   2   9   80.34    2.49
 -20  -2   9   85.29    2.56
 -20  -2   9   83.37    3.06
 -20   2   9   80.27    3.07
 -18  -2   9   39.44    2.21
  18  -2  -9   46.50    5.05
 -18   2   9   42.33    2.29
  18   2  -9   41.83    5.25
 -18   2   9   40.81    1.83
 -18  -2   9   45.99    1.94
  16   2  -9   31.80    4.52
 -16   2   9   31.99    2.03
  16  -2  -9   36.17    4.27
  14  -2  -9   10.90    2.74
  14   2  -9   11.58    3.18
  12  -2  -9    9.62    2.13
  12   2  -9    9.43    2.53
  10   2  -9    0.33    1.72
  10  -2  -9    2.13    1.53
  -8  -2   9  167.25    3.91
  -8   2   9  171.89    3.81
   6  -2  -9  783.26   22.98
   6   2  -9  813.65   23.54
  -6   2   9  798.92   13.83
  -6  -2   9  793.79   13.94
   4  -2  -9    7.42    1.29
   4   2  -9    5.86    1.46
   2  -2  -9  708.44   20.48
   2   2  -9  722.99   20.87
   0   2  -9 1083.80   30.44
  -2   2  -9 2610.73   72.28
  -2   2  -9 2749.56   59.04
  -4   2  -9  628.85   14.99
  -6   2  -9   53.47    2.63
  -8  -2  -9   50.95    3.13
  -8   2  -9   51.99    2.36
  -8   2  -9   51.96    2.79
  -8   2  -9   54.34    2.06
 -10  -2  -9  519.26    9.83
 -10   2  -9  537.69   10.06
 -10   2  -9  526.09   14.09
 -10  -2  -9  507.28   14.34
 -12   2  -9  128.13    5.45
 -12   2  -9  142.41    4.00
 -12  -2  -9  133.82    3.77
 -12  -2  -9  123.08    5.55
 -14  -2  -9  181.35    4.85
 -14   2  -9  191.22    5.07
 -16   2  -9   13.81    1.54
 -16  -2  -9   14.70    1.47
 -16  -2  -9   14.29    1.46
 -16   2  -9   13.88    1.45
 -18   2  -9   17.59    1.54
 -18  -2  -9   14.77    1.45
 -18   2  -9   17.01    1.71
 -20   2  -9    5.73    1.03
 -20  -2  -9    6.12    1.04
 -21   3   9    1.52    0.68
 -21   3   9    0.79    0.84
 -21  -3   9    1.50    0.69
 -19  -3   9    7.20    1.15
  19   3  -9    5.65    3.08
 -19   3   9    3.86    0.77
 -19  -3   9    3.57    0.79
 -19   3   9    5.88    1.14
  19  -3  -9    5.80    2.86
  17  -3  -9   51.23    5.02
 -17  -3   9   51.13    2.08
 -17  -3   9   49.85    2.44
 -17   3   9   54.21    2.62
 -17   3   9   49.94    1.99
  17   3  -9   52.37    5.61
  15  -3  -9   59.68    4.67
  15   3  -9   48.16    5.27
  13   3  -9   32.82    4.41
  13  -3  -9   41.47    3.74
  11  -3  -9   87.06    4.60
  11   3  -9   70.69    4.99
   9   3  -9  230.05    8.69
   7   3  -9  199.22    7.73
  -7  -3   9  196.92    4.41
  -7   3   9  200.31    4.22
   5  -3  -9   43.70    2.51
  -5  -3   9   49.23    1.65
  -5   3   9   47.09    1.52
   5   3  -9   49.57    3.10
   3   3  -9  234.26    8.30
   1   3  -9  791.91   22.99
  -1   3  -9    4.74    1.14
  -3   3  -9  696.39   16.09
  -3   3  -9  689.33   20.10
  -5   3  -9   87.36    3.19
  -7   3  -9   11.52    1.23
  -7   3  -9   13.98    1.45
  -9   3  -9   48.34    2.05
  -9   3  -9   50.32    2.85
  -9  -3  -9   44.39    3.11
  -9  -3  -9   45.82    1.89
  -9   3  -9   48.75    2.31
 -11   3  -9    5.12    1.37
 -11  -3  -9    4.37    1.51
 -11  -3  -9    2.10    0.71
 -11   3  -9    5.38    0.96
 -13   3  -9  106.30    3.50
 -13  -3  -9  101.99    3.27
 -15   3  -9    5.32    1.12
 -15  -3  -9    5.24    0.99
 -17   3  -9    6.42    1.16
 -17  -3  -9    7.74    1.23
 -17   3  -9    8.23    1.22
 -19   3  -9    5.22    1.05
 -19  -3  -9    4.76    1.00
 -22   4   9    6.69    0.84
 -22   4   9    7.37    1.09
 -22  -4   9    5.98    0.83
 -20   4   9   35.62    1.69
 -20  -4   9   41.47    1.79
 -20   4   9   40.17    2.23
 -18  -4   9   30.84    1.63
  18   4  -9   24.04    4.36
  18  -4  -9   33.76    4.31
 -18   4   9   30.76    2.02
 -18  -4   9   28.91    1.90
 -18   4   9   30.83    1.53
  16  -4  -9   81.88    5.78
  16   4  -9   78.89    6.62
 -16   4   9   81.63    3.17
 -16  -4   9   74.02    2.93
  14  -4  -9    7.57    2.22
  14   4  -9    6.05    2.72
  12   4  -9   29.25    3.94
  12  -4  -9   27.46    3.00
  10   4  -9  238.61    9.27
   8   4  -9    6.70    2.00
   8   4  -9    9.49    1.83
  -6   4   9    0.39    0.41
   6  -4  -9    0.78    0.68
   6   4  -9    1.14    1.02
  -6  -4   9    1.00    0.51
  -4   4   9   50.60    1.60
   4   4  -9   50.45    3.19
  -4   4   9   52.02    1.90
  -4  -4   9   51.89    1.76
   2   4  -9   42.56    2.92
  -2   4   9   35.97    1.70
   0   4  -9  213.12    7.66
  -2   4  -9 1237.32   27.39
  -2   4  -9 1204.99   34.19
  -4   4  -9    1.11    0.63
  -6   4  -9   89.36    3.02
  -6   4  -9   95.72    3.55
  -8   4  -9   28.94    1.86
  -8   4  -9   28.20    2.17
  -8   4  -9   26.29    1.63
 -10  -4  -9  220.40    7.89
 -10   4  -9  224.10    5.29
 -10   4  -9  217.92    7.25
 -12  -4  -9    1.46    1.42
 -12   4  -9    1.62    1.18
 -12   4  -9    0.84    0.74
 -14   4  -9    4.71    1.05
 -16  -4  -9    3.81    1.05
 -16   4  -9    3.62    0.99
 -16   4  -9    3.08    0.97
 -18   4  -9   16.01    1.45
 -18  -4  -9   15.39    1.41
 -20   4  -9    0.44    0.72
 -20  -4  -9   -0.96    0.67
 -21   5   9   24.45    1.82
 -21  -5   9   26.11    1.45
 -21   5   9   25.81    1.41
 -19   5   9   29.43    1.54
 -19  -5   9   33.20    1.62
 -19   5   9   35.02    2.15
 -17  -5   9    6.90    0.94
  17   5  -9    6.17    3.29
 -17   5   9    5.63    1.18
  17  -5  -9    8.52    2.81
 -17   5   9    5.19    0.86
  15   5  -9   21.69    4.31
  15  -5  -9   20.93    3.29
  13  -5  -9  302.32   10.25
  13   5  -9  251.66   11.10
  11   5  -9    3.27    2.02
   9   5  -9   21.39    3.19
  -5   5   9   25.88    1.43
  -5  -5   9   27.20    1.44
   5   5  -9   27.47    2.48
  -3  -5   9  148.51    3.47
   3   5  -9  143.08    6.05
  -3   5   9  145.24    4.09
   1   5  -9    3.75    1.17
  -1   5  -9  121.81    5.17
  -3   5  -9   25.68    1.45
  -3   5  -9   35.08    2.41
  -3   5  -9   28.04    1.65
  -5   5  -9   62.42    2.63
  -5   5  -9   60.21    2.35
  -7   5  -9  135.66    3.57
  -7   5  -9  137.10    4.03
  -7   5  -9  141.36    4.81
  -9   5  -9    8.14    1.02
  -9   5  -9    7.42    1.38
  -9   5  -9    7.08    1.14
 -11   5  -9  182.73    4.69
 -11   5  -9  176.60    6.50
 -11  -5  -9  176.97    7.14
 -13   5  -9   22.19    1.66
 -13   5  -9   25.37    1.71
 -15   5  -9   58.52    2.71
 -15  -5  -9   60.08    2.45
 -17   5  -9    4.42    1.08
 -17   5  -9    7.40    1.13
 -17  -5  -9    5.94    1.05
 -19  -5  -9  122.32    3.45
 -19   5  -9  125.70    3.48
 -22   6   9    1.95    0.76
 -20  -6   9   30.91    1.55
 -20   6   9   32.34    2.07
  18  -6  -9   17.20    3.42
 -18   6   9   14.64    1.61
  18   6  -9   15.52    3.86
 -18  -6   9   13.45    1.18
  16   6  -9  118.41    7.89
  16  -6  -9  128.56    7.03
 -16   6   9  124.23    4.09
 -14   6   9  377.52   10.09
  14  -6  -9  390.86   12.75
  14   6  -9  357.68   13.86
  12   6  -9  144.21    8.02
  10   6  -9  175.26    8.04
   8   6  -9   84.43    4.97
  -6   6   9   13.31    1.18
  -4   6   9   50.53    1.69
  -4   6   9   51.54    2.12
   4   6  -9   45.90    3.23
  -2   6   9  414.95   10.07
   2   6  -9  392.63   13.26
  -2  -6   9  421.67    7.98
   0   6  -9 1005.93   28.99
  -2   6  -9  483.93    9.75
  -2   6  -9  486.46   15.05
  -4   6  -9  246.35    6.70
  -4   6  -9  246.49    5.76
  -6   6  -9  255.26    7.18
  -6   6  -9  242.67    5.96
  -8   6  -9  652.58   12.16
  -8   6  -9  685.52   16.99
  -8   6  -9  681.45   13.61
 -10   6  -9  420.19    9.24
 -10   6  -9  399.29   11.51
 -10   6  -9  401.33    8.27
 -12   6  -9  174.29    4.70
 -14   6  -9   33.39    2.05
 -16   6  -9   98.89    3.57
 -16  -6  -9   97.89    3.14
 -18  -6  -9   58.44    2.40
 -20  -6  -9   77.27    2.49
  21   7  -9    0.70    1.89
 -21  -7   9    1.09    0.62
 -21   7   9   -0.17    0.77
 -19  -7   9    8.52    0.97
 -19   7   9   10.05    1.34
 -17   7   9   48.82    2.55
 -17  -7   9   44.55    1.85
  17   7  -9   40.51    5.25
  17  -7  -9   44.47    4.49
 -15   7   9  210.24    5.72
  15   7  -9  204.47   10.23
  15  -7  -9  221.21    9.24
 -15   7   9  217.86    6.93
  13   7  -9  484.02   16.35
  11   7  -9   -1.01    1.88
   9   7  -9  142.54    6.96
   7   7  -9  196.34    7.72
  -7   7   9  224.79    6.24
  -5   7   9  269.42    7.18
  -5   7   9  261.85    5.38
  -3   7   9  439.12   10.62
   3   7  -9  414.74   14.00
   1   7  -9  371.76   12.44
  -1   7  -9  153.12    6.32
  -3   7  -9   62.82    2.34
  -5   7  -9  114.92    3.50
  -5   7  -9  113.55    3.96
  -7   7  -9   56.43    2.17
  -7   7  -9   57.00    2.87
  -7   7  -9   50.70    2.39
  -9   7  -9   86.54    4.03
  -9   7  -9   87.80    2.95
  -9   7  -9   95.47    3.40
 -11   7  -9  139.09    4.05
 -11   7  -9  136.31    5.60
 -13   7  -9    0.49    0.70
 -13   7  -9    0.14    0.66
 -15   7  -9   65.90    2.87
 -15   7  -9   68.90    3.07
 -15  -7  -9   64.65    2.56
 -17  -7  -9    7.70    1.12
 -17   7  -9    9.23    1.35
 -19  -7  -9   61.07    2.33
  20   8  -9   10.48    2.65
 -20   8   9    9.07    1.31
  18   8  -9    2.42    2.72
 -18   8   9    2.69    0.99
  18  -8  -9    2.53    2.18
  16  -8  -9   35.65    4.04
  16   8  -9   37.51    5.15
 -16   8   9   39.05    2.33
 -14   8   9    8.43    1.62
  14   8  -9   10.67    3.46
  12   8  -9   17.87    3.70
  10   8  -9    2.88    2.25
  -8   8   9    5.25    1.07
   8   8  -9    4.14    1.87
   6   8  -9   53.02    3.65
  -6   8   9   57.88    2.61
  -4   8   9  152.70    4.74
  -2   8   9  511.15   12.63
   0   8  -9  139.85    6.10
  -2   8  -9   24.09    1.47
  -2   8  -9   25.32    2.39
  -2   8  -9   24.61    1.56
  -4   8  -9    0.17    0.56
  -6   8  -9  606.78   11.13
  -6   8  -9  625.85   12.53
  -6   8  -9  607.78   15.31
  -8   8  -9   10.32    1.46
  -8   8  -9   11.96    1.30
  -8   8  -9    9.85    1.07
 -10   8  -9    2.13    0.78
 -10   8  -9    1.55    1.05
 -10   8  -9    1.75    0.87
 -12   8  -9    5.55    1.05
 -12   8  -9    4.70    1.05
 -14   8  -9    4.09    1.19
 -14   8  -9    4.03    1.03
 -16   8  -9    3.31    1.09
 -16   8  -9    3.20    1.01
 -16  -8  -9    4.33    0.92
 -18  -8  -9    5.36    1.02
 -21   9   9    5.48    1.03
  21   9  -9    3.76    1.84
  19   9  -9    1.17    2.00
 -19   9   9    0.61    0.86
  17   9  -9   51.81    4.77
  17  -9  -9   47.90    4.70
 -17   9   9   52.21    2.65
  17   9  -9   50.44    5.40
  15   9  -9   30.55    4.54
 -15   9   9   36.55    2.79
 -15   9   9   33.54    2.19
 -13   9   9  943.09   21.16
  13   9  -9  884.26   25.54
  11   9  -9   20.19    3.46
  -9   9   9   16.29    1.70
   9   9  -9   16.58    2.87
   7   9  -9   12.22    2.21
  -7   9   9   13.86    1.50
  -5   9   9   15.19    1.42
   5   9  -9   16.61    2.14
   3   9  -9   40.68    2.83
  -3   9   9   42.81    2.23
  -1   9  -9   49.79    2.02
  -3   9  -9  171.04    4.57
  -3   9  -9  180.87    5.57
  -5   9  -9   97.87    3.31
  -7   9  -9   32.60    1.96
  -7   9  -9   43.15    2.57
  -9   9  -9  113.80    4.80
  -9   9  -9  118.24    3.51
  -9   9  -9  117.97    3.95
 -11   9  -9  114.48    3.63
 -11   9  -9  117.14    4.06
 -13   9  -9   52.13    2.74
 -13   9  -9   51.80    2.52
 -13   9  -9   53.27    2.50
 -15   9  -9   94.79    3.75
 -15   9  -9   98.87    3.54
 -17   9  -9   14.50    1.66
  20  10  -9   34.84    3.51
 -20  10   9   33.00    2.06
  18  10  -9   24.81    3.51
 -18  10   9   23.83    1.89
 -16  10   9   24.60    2.42
  16  10  -9   27.44    4.40
  16 -10  -9   27.36    3.69
  16  10  -9   23.39    3.63
 -16  10   9   26.21    1.99
  14  10  -9  297.07   11.16
  14  10  -9  322.01   12.56
 -14  10   9  315.33    9.11
 -14  10   9  301.69    7.45
  12  10  -9  491.52   15.97
  12  10  -9  459.86   14.45
 -12  10   9  492.64   12.45
  10  10  -9    1.09    1.81
  -8  10   9   28.89    2.19
   8  10  -9   32.84    3.37
   6  10  -9   23.91    2.87
  -6  10   9   23.11    1.89
  -4  10   9  186.87    5.98
   4  10  -9  196.01    6.84
  -2  10   9   21.66    1.71
   2  10  -9   21.52    1.97
   0  10  -9  367.42    9.93
   0  10  -9  372.93    7.90
  -2  10  -9   58.36    2.90
  -2  10  -9   56.66    2.33
  -4  10  -9   52.55    2.30
  -4  10  -9   57.73    2.87
  -6  10  -9  160.70    4.66
  -8  10  -9  257.63    8.27
  -8  10  -9  272.92    6.82
 -10  10  -9   59.29    2.81
 -12  10  -9   35.75    2.30
 -12  10  -9   33.59    2.01
 -12  10  -9   36.14    2.11
 -14  10  -9   67.04    2.87
 -14  10  -9   65.29    3.14
 -16  10  -9    7.39    1.28
 -16  10  -9    7.43    1.41
 -18  10  -9  142.04    4.47
 -19  11   9   13.47    1.49
  19  11  -9   13.03    2.66
 -17  11   9    6.70    1.27
  17  11  -9    9.53    2.64
  15  11  -9    1.74    2.15
 -15  11   9    0.11    0.85
  15  11  -9    0.04    2.58
 -15  11   9    0.95    1.22
  13  11  -9   18.04    3.15
 -13  11   9   21.19    2.34
  13  11  -9   23.67    3.94
  11  11  -9  123.82    6.89
  11  11  -9  118.50    6.13
  -9  11   9  145.46    5.50
   9  11  -9  144.64    7.06
  -7  11   9    2.17    1.02
   7  11  -9    3.51    1.67
   5  11  -9   23.13    2.45
  -5  11   9   24.56    1.98
  -3  11   9  133.18    4.74
   3  11  -9  129.45    5.15
   1  11  -9    0.52    0.95
  -1  11  -9    1.09    0.88
  -1  11  -9    0.11    0.53
  -3  11  -9   15.75    1.66
  -3  11  -9   14.60    1.29
  -5  11  -9    1.39    0.74
  -7  11  -9  125.01    4.15
  -9  11  -9   36.22    2.22
 -11  11  -9    1.41    0.85
 -13  11  -9    4.65    1.11
 -13  11  -9    4.30    1.25
 -15  11  -9    4.24    1.17
 -17  11  -9   24.12    2.05
 -20  12   9    2.73    0.91
  20  12  -9    2.37    1.60
  18  12  -9    6.42    2.25
 -18  12   9    8.73    1.32
  16  12  -9   10.75    3.09
  16  12  -9    7.43    2.41
 -16  12   9    8.10    1.33
 -16  12   9   10.18    1.79
  14  12  -9  100.73    5.98
 -14  12   9   94.25    3.62
  14  12  -9  102.26    6.75
 -14  12   9   99.95    4.58
  12  12  -9    4.04    2.43
  12  12  -9    5.66    2.10
 -12  12   9    5.05    1.47
  10  12  -9  121.90    5.99
  10  12  -9  128.88    6.75
  -8  12   9    0.13    1.00
   8  12  -9    1.35    1.63
  -6  12   9   35.30    2.51
   6  12  -9   37.90    3.25
   4  12  -9   11.01    1.81
  -4  12   9   12.13    1.61
  -2  12   9   90.69    3.87
   2  12  -9   89.97    4.13
   0  12  -9    6.47    1.29
  -2  12  -9    3.00    1.05
  -4  12  -9    1.44    0.86
  -8  12  -9    1.11    3.05
 -12  12  -9    9.53    1.51
  12  12   9   12.68    1.32
 -12  12  -9   11.20    1.42
  14  12   9    9.72    1.23
 -14  12  -9   11.17    1.57
 -16  12  -9   25.96    2.12
 -18  12  -9    1.88    0.92
  18  12   9    1.02    0.79
  19  13  -9   71.99    4.42
 -19  13   9   65.49    2.73
 -17  13   9   18.79    1.79
  17  13  -9   20.37    3.03
 -15  13   9   10.67    1.82
  15  13  -9   10.90    2.62
 -15  13   9   11.45    1.44
  15  13  -9   11.61    3.03
  13  13  -9    1.57    1.92
  13  13  -9    3.44    2.41
 -13  13   9    0.73    1.18
  11  13  -9   24.55    3.12
  11  13  -9   29.00    3.90
 -11  13   9   24.65    2.42
   9  13  -9    2.02    1.92
   7  13  -9  349.85   11.24
  -7  13   9  342.08   10.32
   5  13  -9   42.66    3.30
  -5  13   9   42.95    2.77
   3  13  -9   41.02    2.96
  -3  13   9   35.37    2.57
   1  13  -9   95.42    4.24
  -1  13  -9    2.76    1.10
  -3  13  -9   48.60    2.90
  -7  13  -9    0.71    3.01
 -11  13  -9   33.99    2.31
 -11  13  -9   33.06    2.14
 -13  13  -9  167.74    5.31
  13  13   9  168.95    4.16
  15  13   9   22.60    1.66
 -15  13  -9   22.96    2.11
 -17  13  -9    0.44    0.98
  17  13   9    1.13    0.80
  18  14  -9   60.39    4.11
 -18  14   9   54.32    2.54
  16  14  -9    3.49    1.96
 -16  14   9    3.04    1.38
  14  14  -9   31.40    4.13
 -14  14   9   30.79    2.68
  14  14  -9   32.08    3.57
  12  14  -9   -0.31    1.96
  12  14  -9   -1.36    1.43
 -12  14   9   -0.05    1.06
  10  14  -9    1.85    1.58
 -10  14   9    2.44    1.18
  10  14  -9    1.74    1.93
   8  14  -9  310.80   10.03
   8  14  -9  332.09   11.05
  -6  14   9  421.06   12.33
   6  14  -9  441.79   12.96
  -4  14   9    0.06    1.11
   4  14  -9    1.94    1.36
   2  14  -9   41.37    2.97
   0  14  -9    3.37    1.16
  -2  14  -9  106.37    4.60
  -4  14  -9  420.21   11.73
  -6  14  -9    0.67    3.01
  -8  14  -9   14.61    1.94
  -8  14  -9   12.41    1.37
 -10  14  -9  118.84    3.89
 -10  14  -9  115.41    4.24
 -12  14  -9   21.36    1.84
  12  14   9   19.94    1.57
 -12  14  -9   19.19    1.97
  14  14   9  155.39    3.89
 -14  14  -9  155.26    5.07
 -16  14  -9   60.33    2.95
  16  14   9   62.35    2.31
  17  15  -9   24.34    3.03
  15  15  -9   17.80    2.85
 -15  15   9   18.08    2.22
 -13  15   9   30.12    2.64
  13  15  -9   29.98    3.78
  13  15  -9   28.15    3.33
  11  15  -9   19.67    2.86
  11  15  -9   18.96    3.21
 -11  15   9   20.29    2.34
   9  15  -9    7.82    2.39
   9  15  -9   10.74    2.26
   7  15  -9   82.41    4.46
   7  15  -9   88.14    5.09
   5  15  -9    0.93    1.27
  -5  15   9    0.12    1.08
  -5  15   9    0.04    2.49
   3  15  -9    5.37    1.55
   1  15  -9  365.71   10.77
  -1  15  -9   12.34    1.88
  -5  15  -9   -0.67    2.91
  -7  15  -9   -0.24    3.26
  -9  15  -9   42.07    2.61
  -9  15  -9   39.72    2.87
 -11  15  -9   19.67    1.94
  11  15   9   14.83    1.27
 -11  15  -9   18.18    1.78
 -13  15  -9    0.06    1.04
  13  15   9    0.30    0.83
 -15  15  -9  123.95    4.30
 -16  16   9    5.87    1.54
  16  16  -9    7.94    2.10
  14  16  -9    3.08    1.90
 -14  16   9    1.40    1.27
  12  16  -9    1.17    1.88
  12  16  -9    2.44    1.69
 -12  16   9    0.47    1.05
  10  16  -9  170.80    7.17
  10  16  -9  175.29    7.80
   8  16  -9  146.94    6.30
   8  16  -9  151.48    6.84
   6  16  -9  233.24    7.96
   6  16  -9  227.47    8.48
   4  16  -9   58.07    3.45
   4  16  -9   61.93    3.92
   2  16  -9    3.70    1.41
  -2  16   9   -0.19    2.37
  -2  16  -9    0.93    3.27
   2  16   9   -1.09    2.45
  -2  16  -9    6.06    1.51
  -4  16  -9    2.00    3.54
  -4  16  -9   11.28    1.77
  -4  16  -9    8.88    1.85
  -8  16  -9    1.74    1.00
  -8  16  -9    1.33    1.07
  -8  16  -9    0.44    3.11
 -10  16  -9    1.42    3.36
 -10  16  -9    1.71    1.21
 -10  16  -9    1.77    1.02
 -12  16  -9   59.75    3.12
 -14  16  -9    1.57    1.10
 -16  16  -9    4.41    1.17
  17  17  -9   12.04    2.09
  15  17  -9   36.12    3.40
 -15  17   9   42.58    2.98
  13  17  -9    4.81    1.93
 -13  17   9    5.07    1.54
  11  17  -9   17.73    2.65
 -11  17   9   17.26    2.16
  11  17  -9   15.00    2.73
   9  17  -9   13.05    2.38
   9  17  -9   13.97    2.68
   7  17  -9  658.98   18.09
   7  17  -9  647.85   16.93
   5  17  -9   38.37    3.31
   5  17  -9   38.57    2.99
   3  17  -9  175.21    6.55
   3  17  -9  193.86    7.24
  -1  17   9    0.02    2.69
   1  17  -9   10.33    1.92
   1  17  -9   -1.75    3.28
  -5  17  -9   34.44    2.76
  -5  17  -9   33.65    2.33
  -7  17  -9    1.08    1.02
  -7  17  -9    0.53    3.34
  -7  17  -9    1.08    1.12
  -9  17  -9  188.12    6.62
  -9  17  -9  174.45    5.53
 -11  17  -9    3.24    1.18
 -11  17  -9   -0.14    3.23
 -11  17  -9    2.23    1.33
 -13  17  -9   83.95    3.56
 -15  17  -9   34.77    2.23
  16  18  -9   10.32    1.98
 -16  18   9    9.02    1.65
  14  18  -9    2.95    1.68
 -14  18   9    1.91    1.33
 -12  18   9    0.70    1.19
  12  18  -9    0.72    1.49
  10  18  -9   57.93    4.01
  10  18  -9   53.01    4.17
   8  18  -9  249.62    8.64
   8  18  -9  247.53    9.22
   6  18  -9  215.04    8.15
   6  18  -9  205.72    7.51
  -4  18   9   -0.34    2.92
   4  18  -9    3.78    1.69
   4  18  -9    4.25    1.50
  -2  18   9    0.04    2.78
   2  18  -9    7.32    1.79
   2  18  -9    4.80    1.43
  -6  18  -9    3.91    1.35
  -6  18  -9    4.21    1.25
  -6  18  -9   -1.50    3.04
  -8  18  -9   54.62    2.94
  -8  18  -9   60.17    3.54
 -10  18  -9    4.77    1.26
 -10  18  -9   -0.55    3.05
 -10  18  -9    5.86    1.56
 -12  18  -9   50.55    2.80
 -12  18  -9   45.77    3.05
 -14  18  -9   58.82    2.80
 -15  19   9   19.64    2.16
  15  19  -9   21.55    2.52
  13  19  -9   17.80    2.55
 -13  19   9   17.71    2.20
  11  19  -9   41.69    3.49
   9  19  -9    4.68    1.85
   9  19  -9    5.06    1.72
   7  19  -9   15.79    2.57
   7  19  -9   19.13    2.53
   5  19  -9   11.31    2.04
   5  19  -9   11.87    2.27
   3  19  -9   18.56    2.50
   3  19  -9   15.68    2.17
   1  19  -9   51.97    3.67
   1  19  -9   46.30    3.28
  -7  19  -9   12.79    1.95
  -7  19  -9   15.21    1.75
  -9  19  -9   21.79    2.02
  -9  19  -9   22.76    2.42
 -11  19  -9   31.58    2.63
 -11  19  -9   28.36    2.26
 -13  19  -9    1.30    1.00
  14  20  -9    3.77    1.55
  12  20  -9  103.08    5.11
  10  20  -9    1.13    1.39
   8  20  -9    2.24    1.62
  -8  20   9   -0.01    3.19
   8  20  -9    3.44    1.55
  -6  20   9    0.53    3.04
   6  20  -9    5.28    1.81
   6  20  -9    4.71    1.64
   4  20  -9    2.80    1.60
   4  20  -9    4.44    1.52
  -4  20   9    0.51    3.18
   2  20  -9   23.42    2.61
   2  20  -9   20.43    2.69
  -2  20  -9   14.65    2.10
  -2  20  -9   12.60    2.17
   2  20   9   -0.39    3.14
  -2  20  -9    0.37    3.78
  -4  20  -9    5.66    1.53
  -4  20  -9   -0.11    3.44
  -8  20  -9   -0.50    1.09
  -8  20  -9    0.89    3.55
  -8  20  -9   -0.32    0.87
 -10  20  -9    2.91    1.14
 -10  20  -9    1.23    3.20
 -10  20  -9    2.77    1.27
 -12  20  -9   22.42    2.20
 -12  20  -9   18.50    1.81
  11  21  -9   40.42    3.29
   7  21  -9   16.64    2.38
   5  21  -9   18.71    2.68
   5  21  -9   14.70    2.20
   3  21  -9    7.01    1.95
   3  21  -9    7.19    1.75
   1  21  -9  208.58    7.40
   1  21  -9  200.29    7.75
  -5  21  -9    2.92    1.34
  -5  21  -9   -0.89    3.45
  -9  21  -9   17.27    2.11
  -9  21  -9   20.29    2.00
 -11  21  -9   73.18    3.08
 -11  21  -9   72.96    3.61
  12  22  -9   78.27    4.10
  10  22  -9    0.69    1.25
   8  22  -9   17.63    2.39
   6  22  -9   14.60    2.20
  -6  22   9   -0.30    3.23
  -2  22  -9    0.23    3.91
   2  22   9   -0.88    3.29
  -2  22  -9   -0.97    1.13
  -6  22  -9   -1.12    3.17
  -6  22  -9    0.85    1.14
   9  23  -9    0.31    1.13
  -9  23   9   -0.87    2.91
  -7  23   9   -0.86    3.02
   7  23  -9    6.70    1.74
   5  23  -9    3.08    1.53
  -5  23   9   -0.78    3.03
   1  23   9   -2.33    3.07
  -1  23  -9   -0.10    3.54
  -1  23  -9    5.30    1.59
  -3  23  -9    2.29    1.27
  -3  23  -9   -0.05    3.58
   3  23   9   -0.03    3.35
  -7  23  -9   -0.24    1.01
  -7  23  -9    2.14    3.48
  -8  24   9   -0.87    2.73
   8  24  -9    8.85    1.71
   6  24  -9   -0.07    1.15
  -6  24   9   -1.10    2.88
   4  24  -9    0.35    1.21
  -4  24   9   -0.14    3.35
   2  24   9   -0.23    3.19
  -2  24  -9   -0.35    3.41
  -4  24  -9    7.08    1.55
  -4  24  -9    0.63    3.35
   5  25  -9    0.55    1.09
  -5  25   9   -0.23    2.83
  -1  25  -9    1.45    1.12
  -1  25  -9    0.59    3.41
   1  25   9    0.78    3.30
 -22   0  10    8.76    0.93
 -22   0  10    7.22    1.07
 -20   0  10  261.18    5.21
 -20   0  10  260.96    6.33
 -18   0  10   29.40    1.57
  18   0 -10   26.46    4.37
 -18   0  10   30.45    1.96
  16   0 -10  121.81    7.28
 -16   0  10  122.77    3.86
  14   0 -10    1.32    1.97
  12   0 -10  225.97    8.97
  10   0 -10   44.41    3.74
 -10   0  10   46.82    1.87
  -8   0  10  367.24    7.11
  -6   0  10  239.53    4.87
   6   0 -10  236.16    8.50
   4   0 -10   91.91    4.28
  -4   0  10   96.56    2.41
   2   0 -10  431.92   13.33
   0   0 -10  459.53   13.96
  -2   0 -10 1108.55   30.87
  -2   0 -10 1094.79   25.08
  -4   0 -10  661.03   16.16
  -4   0 -10  680.15   19.51
  -6   0 -10    1.25    0.78
  -8   0 -10  842.41   17.24
  -8   0 -10  899.02   21.54
  -8   0 -10  865.75   15.15
 -10   0 -10   39.83    2.80
 -10   0 -10   42.46    1.95
 -12   0 -10  713.08   13.20
 -12   0 -10  703.83   18.84
 -14   0 -10  675.49   12.90
 -16   0 -10   16.20    1.57
 -16   0 -10   14.53    1.47
 -18   0 -10   30.68    1.94
 -20   0 -10   41.39    2.00
 -21  -1  10   25.21    1.78
 -21   1  10   24.66    1.48
 -21   1  10   25.08    1.82
 -21  -1  10   24.07    1.46
 -19   1  10   35.34    1.68
 -19   1  10   32.78    2.00
 -19  -1  10   31.66    2.00
  19  -1 -10   29.09    4.55
 -19  -1  10   31.60    1.63
  19   1 -10   32.77    4.77
 -17   1  10    6.09    1.14
 -17  -1  10    5.99    1.09
  17   1 -10    2.01    2.56
 -17  -1  10    5.16    0.89
  17  -1 -10    3.83    2.57
 -17   1  10    5.76    0.88
  15   1 -10   50.50    5.06
  15  -1 -10   50.89    4.63
  13   1 -10    0.84    1.84
  13  -1 -10    1.79    1.72
  11   1 -10    6.10    2.06
  11  -1 -10    7.28    1.85
   9   1 -10   13.82    2.39
   9  -1 -10   14.30    2.14
  -9   1  10   14.46    1.13
  -9  -1  10   12.89    1.06
   7  -1 -10 1311.23   37.67
   7   1 -10 1354.49   38.05
  -7  -1  10 1344.79   22.75
  -7   1  10 1341.04   22.69
  -5   1  10   69.47    1.99
   5   1 -10   71.28    3.76
  -5  -1  10   72.03    2.03
   5  -1 -10   71.77    3.61
   3   1 -10  832.20   24.74
   3  -1 -10  887.36   24.60
  -3   1  10  850.19   14.75
  -3  -1  10  859.13   14.77
   1  -1 -10  418.61   12.86
   1   1 -10  424.04   13.10
  -1  -1 -10 1108.76   31.17
  -1   1 -10 1120.58   31.33
  -3   1 -10   68.86    3.35
  -3  -1 -10   68.28    3.31
  -3   1 -10   68.52    2.53
  -5  -1 -10  228.91    6.95
  -5   1 -10  237.52    6.71
  -7   1 -10   84.11    3.20
  -7  -1 -10   87.64    3.84
  -7   1 -10   88.33    3.65
  -9   1 -10  447.00   10.14
  -9   1 -10  486.19   12.84
  -9  -1 -10  447.63    8.87
  -9   1 -10  458.58    8.98
  -9  -1 -10  483.09   12.99
 -11  -1 -10   72.57    4.00
 -11   1 -10   68.48    3.82
 -11   1 -10   75.73    2.78
 -11  -1 -10   74.68    2.71
 -13  -1 -10  568.78   11.12
 -13   1 -10  578.69   11.24
 -15   1 -10   22.11    1.74
 -15  -1 -10   24.92    1.75
 -17  -1 -10    8.89    1.26
 -17  -1 -10    1.14    0.96
 -17   1 -10    7.86    1.25
 -19   1 -10    8.15    1.16
 -19  -1 -10   10.11    1.24
 -22   2  10    5.71    1.02
 -22   2  10    4.16    0.74
 -22  -2  10    6.34    0.85
 -20   2  10   16.88    1.29
 -20   2  10   16.73    1.70
 -20  -2  10   18.58    1.37
 -20  -2  10   18.13    1.66
  18  -2 -10    9.64    3.08
 -18  -2  10    7.68    1.16
 -18   2  10    7.02    0.93
  18   2 -10   10.04    3.38
 -18   2  10    7.80    1.24
 -18  -2  10    8.10    0.98
  16   2 -10    1.70    2.62
 -16   2  10    2.73    0.94
 -16  -2  10    2.70    0.90
  16  -2 -10    4.93    2.44
  14   2 -10   -0.99    1.99
  14  -2 -10    2.97    1.88
  12   2 -10   18.77    3.26
  12  -2 -10   23.49    2.99
  10   2 -10   24.40    3.31
  10  -2 -10   25.01    2.60
  -8  -2  10   91.49    2.68
  -8   2  10   97.21    2.58
   6   2 -10   30.41    2.59
  -6   2  10   30.78    1.36
  -6  -2  10   30.17    1.35
   4  -2 -10  480.18   14.69
  -4  -2  10  482.38    8.82
   4   2 -10  489.70   15.26
  -4   2  10  488.43    8.80
  -2   2  10    2.07    0.52
   2  -2 -10    2.03    0.83
   2   2 -10    4.59    1.21
   0   2 -10   49.74    2.91
  -2   2 -10  150.28    5.75
  -4   2 -10   22.33    1.49
  -6   2 -10  106.06    3.56
  -6   2 -10  112.69    4.03
  -8   2 -10   22.60    2.06
  -8  -2 -10   22.95    2.42
  -8   2 -10   23.18    1.59
  -8   2 -10   22.71    1.93
  -8  -2 -10   23.18    1.47
 -10  -2 -10   71.49    3.90
 -10  -2 -10   69.74    2.54
 -10   2 -10   70.04    2.60
 -10   2 -10   70.00    3.62
 -12   2 -10   50.24    2.38
 -12   2 -10   47.88    3.24
 -12  -2 -10   46.83    2.23
 -12  -2 -10   49.66    3.49
 -14  -2 -10   -0.20    0.66
 -14   2 -10    0.28    0.79
 -16  -2 -10    2.77    0.89
 -16   2 -10    2.06    0.92
 -16  -2 -10    1.97    0.92
 -16   2 -10    2.25    0.95
 -18  -2 -10    3.89    1.00
 -18   2 -10    2.70    0.96
 -20  -2 -10   -0.09    0.75
 -20   2 -10   -1.19    0.67
 -21   3  10   26.72    1.86
 -21  -3  10   30.35    1.58
 -21   3  10   25.77    1.46
 -19   3  10   24.18    1.39
 -19  -3  10   24.84    1.48
 -19  -3  10   25.65    1.83
  19  -3 -10   25.18    4.26
  19   3 -10   24.98    4.44
 -19   3  10   25.18    1.88
 -17  -3  10    6.42    1.14
  17  -3 -10    4.44    2.56
 -17  -3  10    4.00    0.82
 -17   3  10    4.44    0.83
  17   3 -10    5.38    3.21
 -17   3  10    4.95    1.10
  15  -3 -10   42.54    4.25
  15   3 -10   35.41    4.73
  13   3 -10   56.53    5.22
  13  -3 -10   66.62    4.50
  11  -3 -10   13.07    2.19
  11   3 -10   13.51    2.79
   9   3 -10  141.18    6.81
   9  -3 -10  165.58    6.20
   7   3 -10 1390.54   39.08
  -7   3  10 1365.05   23.14
  -7  -3  10 1340.35   23.31
  -5  -3  10   15.64    1.01
   5   3 -10   14.31    1.89
  -5   3  10   16.28    0.99
   5  -3 -10   21.05    1.73
   3   3 -10   55.60    3.34
   3  -3 -10   54.67    2.91
  -3   3  10   57.52    1.75
  -3  -3  10   58.19    1.78
   1   3 -10  903.74   26.19
  -1   3 -10  242.19    8.43
  -3   3 -10  681.54   13.30
  -3   3 -10  710.62   20.46
  -5   3 -10  153.36    4.38
  -5   3 -10  165.07    4.96
  -7   3 -10   38.66    2.29
  -7   3 -10   38.87    1.80
  -7   3 -10   35.52    2.01
  -9   3 -10   85.11    2.80
  -9  -3 -10   80.53    2.62
  -9  -3 -10   85.11    4.22
  -9   3 -10   88.90    3.91
  -9   3 -10   82.16    3.15
 -11  -3 -10   19.33    2.29
 -11   3 -10   19.88    1.57
 -11  -3 -10   17.30    1.41
 -11   3 -10   18.27    2.10
 -13  -3 -10   80.48    2.89
 -13   3 -10   79.23    3.03
 -15   3 -10    6.38    1.17
 -15  -3 -10    7.80    1.20
 -17   3 -10   25.15    1.77
 -17   3 -10   26.80    1.91
 -17  -3 -10   24.06    1.81
 -19   3 -10   23.38    1.68
 -19  -3 -10   25.71    1.73
 -22   4  10    7.06    0.85
 -22  -4  10    7.38    0.86
 -22   4  10    7.05    1.08
 -20   4  10   35.86    2.15
 -20  -4  10   33.79    1.65
 -20   4  10   32.00    1.60
 -18  -4  10   11.98    1.34
  18  -4 -10    9.75    2.99
 -18   4  10   10.50    1.33
 -18  -4  10   11.95    1.08
 -18   4  10   11.95    1.08
  18   4 -10   12.24    3.61
  16   4 -10   23.84    4.37
 -16  -4  10   27.43    1.93
 -16   4  10   31.26    2.03
  16  -4 -10   28.43    3.92
  14  -4 -10  110.22    6.05
  14   4 -10   96.65    6.80
  12   4 -10   69.37    5.50
  12  -4 -10   83.34    4.70
  10   4 -10  217.50    8.94
   8   4 -10  342.50   11.13
  -6  -4  10  226.47    4.81
   6   4 -10  228.64    8.60
   6  -4 -10  203.21    7.61
  -6   4  10  220.66    4.58
  -4   4  10    0.31    0.39
   4   4 -10    1.24    0.97
  -4  -4  10    0.27    0.43
  -2  -4  10    0.66    0.51
   2   4 -10    0.19    0.90
   0   4 -10  345.33   11.45
  -2   4 -10   22.73    1.51
  -2   4 -10   22.53    2.09
  -4   4 -10   16.47    1.23
  -6   4 -10   19.47    1.62
  -6   4 -10   18.98    1.56
  -8   4 -10    3.24    0.90
  -8   4 -10    2.53    0.97
  -8   4 -10    2.90    0.70
 -10   4 -10  155.82    4.17
 -10   4 -10  152.76    5.70
 -10  -4 -10  147.71    6.16
 -12   4 -10  186.91    4.96
 -14   4 -10    3.48    1.00
 -16  -4 -10    2.42    0.92
 -16   4 -10    2.46    0.94
 -16   4 -10    4.69    1.07
 -18  -4 -10   63.96    2.53
 -18   4 -10   67.50    2.58
 -20  -4 -10   20.48    1.47
 -20   4 -10   22.55    1.54
 -21   5  10   17.82    1.25
 -21   5  10   19.60    1.65
 -21  -5  10   17.81    1.26
 -19  -5  10    2.31    0.74
 -19   5  10    2.19    0.71
 -19   5  10    1.58    0.93
  17  -5 -10   -1.47    1.95
 -17   5  10   -0.23    0.60
 -17  -5  10    1.08    0.90
 -17   5  10   -0.64    0.80
  17   5 -10    0.65    2.87
 -17  -5  10   -0.41    0.56
  15  -5 -10   12.72    2.82
  15   5 -10   12.62    3.65
  13  -5 -10  131.51    6.45
  13   5 -10  119.73    7.63
  11   5 -10  216.15    9.30
   9   5 -10   11.09    2.59
   7   5 -10   28.64    3.09
  -5  -5  10   45.20    1.74
   5   5 -10   43.64    3.17
  -5   5  10   42.94    1.55
   3   5 -10   21.20    2.21
  -3   5  10   24.25    1.16
  -3  -5  10   22.71    1.21
   1   5 -10  610.32   18.70
  -1   5 -10    8.52    1.07
  -1   5 -10    7.90    1.49
  -3   5 -10  657.20   12.77
  -5   5 -10  248.22    6.03
  -5   5 -10  256.71    7.02
  -7   5 -10  277.02    6.76
  -7   5 -10  286.23    6.13
  -7   5 -10  288.33    8.20
  -9   5 -10  296.88    8.90
  -9   5 -10  298.53    6.48
  -9   5 -10  295.61    7.18
 -11   5 -10  184.03    4.78
 -11   5 -10  178.44    6.62
 -11  -5 -10  180.52    7.23
 -13   5 -10    0.29    0.69
 -13   5 -10    1.55    0.81
 -15  -5 -10   31.63    1.86
 -15   5 -10   30.54    2.02
 -17   5 -10    2.95    0.95
 -17   5 -10    1.21    0.87
 -17  -5 -10    1.06    0.83
 -19  -5 -10   32.96    1.88
 -19   5 -10   37.14    1.97
 -20   6  10   30.36    2.00
 -20  -6  10   26.12    1.48
 -18  -6  10    9.14    0.98
  18  -6 -10    7.16    2.71
  18   6 -10   10.40    3.41
 -18   6  10    7.37    1.23
  16   6 -10   16.33    3.94
  16  -6 -10   17.49    3.19
 -16   6  10   15.69    1.68
  14  -6 -10   18.76    2.98
  14   6 -10   19.34    4.09
 -14   6  10   18.91    2.11
  12   6 -10   -1.28    2.09
  10   6 -10   32.64    4.05
   8   6 -10   50.92    4.37
  -6   6  10    2.09    0.58
   6  -6 -10    2.65    0.95
  -4   6  10   83.53    2.88
  -4   6  10   85.63    2.36
  -4  -6  10   84.70    2.60
  -2   6  10  207.16    5.62
  -2  -6  10  209.26    4.63
   2   6 -10  195.86    7.91
   0   6 -10   53.80    3.46
   0   6 -10   55.44    2.31
  -2   6 -10   68.90    2.60
  -2   6 -10   72.36    3.93
  -4   6 -10    1.21    0.66
  -6   6 -10  581.79   14.40
  -6   6 -10  569.48   11.79
  -6   6 -10  573.70   10.63
  -8   6 -10   87.47    3.20
  -8   6 -10   87.00    2.85
  -8   6 -10   85.32    3.76
 -10   6 -10   12.91    1.36
 -10   6 -10   12.79    1.82
 -10   6 -10   13.60    1.58
 -12   6 -10    1.05    0.72
 -14   6 -10    4.05    1.07
 -16  -6 -10    0.47    0.78
 -16   6 -10    0.84    0.80
 -18  -6 -10   31.08    1.84
 -20  -6 -10    1.23    0.68
  21   7 -10    2.51    1.95
 -21  -7  10    2.13    0.66
 -21   7  10    2.32    0.93
 -19   7  10   26.00    1.93
 -19  -7  10   25.90    1.45
  17  -7 -10   28.89    3.88
 -17  -7  10   30.74    1.53
 -17   7  10   31.29    2.12
  17   7 -10   31.44    4.76
 -15   7  10    5.77    1.17
  15  -7 -10    5.02    2.22
  15   7 -10    5.61    3.28
  13   7 -10  190.24    9.38
  11   7 -10   10.95    2.88
   9   7 -10  341.86   11.74
   7   7 -10    1.53    1.50
  -5   7  10  396.76    7.56
  -5   7  10  386.47    9.91
  -3   7  10 1422.85   32.25
   1   7 -10  337.59    7.44
   1   7 -10  335.97   11.66
  -1   7 -10  592.21   18.34
  -1   7 -10  592.49   11.73
  -3   7 -10  182.34    4.67
  -5   7 -10  131.50    3.88
  -7   7 -10 1357.07   22.97
  -7   7 -10 1362.10   25.57
  -7   7 -10 1384.32   31.99
  -9   7 -10  103.98    3.66
  -9   7 -10  102.98    4.46
  -9   7 -10  107.06    3.32
 -11   7 -10   20.67    1.65
 -11   7 -10   21.25    2.21
 -13   7 -10    4.03    1.02
 -13   7 -10    4.35    0.99
 -15   7 -10   53.45    2.59
 -15  -7 -10   50.22    2.25
 -17  -7 -10    3.03    0.90
 -19  -7 -10  155.52    3.80
  20   8 -10   -2.93    1.60
 -20   8  10   -0.39    0.79
  18   8 -10   22.77    3.55
 -18   8  10   20.72    1.87
 -16   8  10   43.02    2.42
  16   8 -10   41.39    5.21
  16  -8 -10   40.09    4.23
 -14   8  10  586.04   14.28
  14   8 -10  548.67   18.40
  12   8 -10  543.98   17.41
  10   8 -10  336.91   11.99
   8   8 -10  142.26    6.60
  -6   8  10   88.84    3.38
   6   8 -10   79.74    4.48
  -4   8  10  235.49    5.05
  -4   8  10  226.05    6.47
  -2   8  10  173.22    5.22
  -2   8 -10  813.44   15.75
  -2   8 -10  833.45   15.69
  -4   8 -10  544.64   11.26
  -4   8 -10  557.03   13.42
  -6   8 -10  396.78    7.84
  -6   8 -10  389.01    8.73
  -8   8 -10  513.17   10.96
  -8   8 -10  503.63    9.75
  -8   8 -10  493.54   13.40
 -10   8 -10   58.36    3.44
 -10   8 -10   59.15    2.83
 -10   8 -10   60.66    2.50
 -12   8 -10    1.29    0.78
 -12   8 -10    0.96    0.78
 -14   8 -10  104.38    3.90
 -14   8 -10  104.93    3.67
 -16  -8 -10   23.07    1.67
 -16   8 -10   23.99    1.82
 -16   8 -10   25.04    2.05
 -18  -8 -10  199.83    4.49
  21   9 -10   -1.67    1.33
 -21   9  10    0.49    0.77
 -19   9  10    6.17    1.18
  19   9 -10    7.82    2.43
 -17   9  10    0.79    0.87
  17   9 -10   -0.44    2.00
  17   9 -10   -1.05    2.33
  17  -9 -10    1.37    1.96
 -15   9  10   50.34    3.22
  15   9 -10   52.01    4.84
  15  -9 -10   52.02    4.56
 -15   9  10   47.65    2.55
  15   9 -10   51.35    5.47
  13   9 -10  359.56   13.53
 -13   9  10  376.89   10.16
  11   9 -10    4.91    2.45
   9   9 -10   53.24    4.49
   7   9 -10    5.24    1.79
  -7   9  10    5.41    1.15
  -5   9  10   25.33    1.92
   5   9 -10   24.20    3.01
   3   9 -10  601.87   15.39
  -3   9  10  617.44   15.01
   1   9 -10    2.34    0.69
  -1   9 -10   67.95    3.02
  -1   9 -10   66.39    2.47
  -3   9 -10   79.62    2.88
  -3   9 -10   79.27    3.37
  -5   9 -10   11.36    1.32
  -7   9 -10   31.31    2.02
  -7   9 -10   32.71    1.77
  -9   9 -10  139.49    4.46
  -9   9 -10  135.68    3.92
 -11   9 -10   11.47    1.32
 -11   9 -10    8.71    1.22
 -11   9 -10   11.37    1.53
 -13   9 -10   41.71    2.55
 -13   9 -10   45.61    2.34
 -13   9 -10   39.28    2.27
 -15   9 -10    5.22    1.13
 -15   9 -10    4.12    1.16
 -17   9 -10   13.71    1.62
 -20  10  10    3.82    1.04
  20  10 -10    6.13    2.10
  18  10 -10   -1.03    1.72
 -18  10  10    0.28    0.83
  16  10 -10   -0.07    2.40
  16 -10 -10    1.27    1.84
  16  10 -10   -1.26    1.82
 -16  10  10    0.30    0.77
 -16  10  10   -0.20    0.99
 -14  10  10  171.15    6.08
  14  10 -10  173.56    8.94
  14  10 -10  165.35    7.91
 -14  10  10  155.28    4.78
 -12  10  10   11.74    1.74
  12  10 -10    9.60    3.10
  12  10 -10    9.22    2.56
  10  10 -10  203.37    8.74
   8  10 -10   10.85    2.52
  -6  10  10   96.87    3.85
   6  10 -10   91.73    4.79
   4  10 -10  358.87   10.53
  -4  10  10  364.76    9.83
  -2  10  10   51.88    2.70
   2  10 -10   54.37    3.10
   0  10 -10  201.96    6.49
   0  10 -10  219.17    5.22
  -2  10 -10   35.41    2.31
  -2  10 -10   33.87    1.93
  -4  10 -10   27.57    1.78
  -4  10 -10   28.83    2.07
  -6  10 -10  203.12    5.53
  -8  10 -10    2.38    0.89
 -10  10 -10    1.16    0.85
 -12  10 -10    5.37    1.24
 -12  10 -10    6.16    1.18
 -12  10 -10    4.14    1.03
 -14  10 -10    9.50    1.33
 -14  10 -10    8.29    1.43
 -16  10 -10    2.53    1.08
 -18  10 -10   12.59    1.48
 -19  11  10   48.53    2.46
  19  11 -10   47.20    3.99
 -17  11  10    5.36    1.18
  17  11 -10    7.63    2.52
  15  11 -10  102.75    6.16
 -15  11  10   96.70    3.63
  15  11 -10  106.42    7.02
 -15  11  10  106.39    4.72
 -13  11  10  226.44    7.25
  13  11 -10  224.17   10.05
  13  11 -10  207.94    8.83
  11  11 -10   19.41    3.46
  11  11 -10   20.53    3.01
   9  11 -10  107.94    5.97
   7  11 -10  280.29    9.70
  -7  11  10  273.18    8.33
  -5  11  10  282.13    8.33
   5  11 -10  289.82    9.24
   3  11 -10   13.34    1.84
  -3  11  10   14.17    1.63
   1  11 -10  465.44   12.28
  -1  11 -10   56.97    2.34
  -1  11 -10   60.92    3.09
  -3  11 -10  184.47    6.04
  -3  11 -10  183.01    4.96
  -5  11 -10  175.19    5.03
  -7  11 -10  204.01    5.73
 -11  11 -10   97.61    3.46
 -11  11 -10   93.30    3.68
 -13  11 -10    3.05    1.08
 -13  11 -10    1.54    1.05
 -15  11 -10   14.57    1.69
 -17  11 -10   18.62    1.88
  20  12 -10   65.60    4.07
  18  12 -10    9.79    2.43
 -18  12  10    5.41    1.14
 -16  12  10   18.09    2.12
  16  12 -10   14.06    2.87
  16 -12 -10   13.77    3.17
  16  12 -10   19.18    3.61
 -16  12  10   16.60    1.70
  14  12 -10   13.14    2.87
  14  12 -10   16.75    3.66
 -14  12  10   14.60    2.04
 -12  12  10   28.79    2.59
  12  12 -10   32.72    3.71
  12  12 -10   32.48    4.08
  10  12 -10   54.44    4.20
  10  12 -10   60.16    4.87
  -8  12  10   72.37    3.74
   8  12 -10   72.34    4.73
  -6  12  10  137.54    5.16
   6  12 -10  130.86    5.90
  -4  12  10   47.10    2.76
   4  12 -10   46.82    3.16
   2  12 -10  200.98    6.81
   0  12 -10  201.11    6.61
  -2  12 -10    2.95    1.02
  -4  12 -10    9.45    1.31
  -4  12 -10   11.99    1.67
  -6  12 -10  338.28    8.21
  -8  12 -10    0.01    2.94
  12  12  10   64.22    2.48
 -12  12 -10   61.95    3.05
 -12  12 -10   66.06    2.91
  14  12  10   66.80    2.55
 -14  12 -10   66.10    3.20
  16  12  10    7.10    1.12
 -16  12 -10    5.61    1.23
  18  12  10   30.56    1.66
 -18  12 -10   29.84    1.97
  19  13 -10    6.30    1.89
 -19  13  10    4.72    1.02
  17  13 -10    4.65    1.99
 -17  13  10    4.12    1.09
  15  13 -10    5.00    2.48
  15  13 -10    5.14    2.14
 -15  13  10    6.37    1.60
 -13  13  10   10.55    1.81
  13  13 -10   10.61    3.04
  13  13 -10    8.73    2.47
  11  13 -10    6.04    2.10
  11  13 -10    5.72    2.44
   9  13 -10   80.32    5.32
   9  13 -10   78.05    4.69
  -7  13  10   15.94    2.07
   7  13 -10   18.71    2.75
   5  13 -10   15.04    2.25
  -5  13  10   11.23    1.74
  -3  13  10  225.28    7.38
   3  13 -10  233.68    7.77
   1  13 -10   11.28    1.74
  -1  13 -10   56.29    3.21
  -3  13 -10   40.59    2.71
  -7  13 -10   -0.03    2.74
  -9  13 -10   -0.97    2.85
  -9  13 -10    1.61    0.81
 -11  13 -10   10.00    1.54
 -11  13 -10    8.36    1.32
  11  13  10   10.64    1.18
 -13  13 -10    2.42    1.12
  13  13  10    0.60    0.80
 -15  13 -10   73.62    3.28
  15  13  10   73.37    2.58
  17  13  10   11.06    1.14
 -17  13 -10   12.99    1.54
 -18  14  10   11.60    1.33
  18  14 -10   12.77    2.31
  16  14 -10   10.03    2.42
 -16  14  10    9.69    1.82
 -14  14  10    0.80    1.14
  14  14 -10    0.84    2.12
  14  14 -10   -0.46    1.53
  12  14 -10   11.54    2.94
 -12  14  10   12.85    1.97
  12  14 -10    9.59    2.46
  10  14 -10   -0.02    1.75
  10  14 -10    0.74    1.52
   8  14 -10  109.70    5.82
   8  14 -10  103.54    5.24
  -6  14  10  144.08    5.81
   6  14 -10  144.55    6.42
   4  14 -10    3.23    1.34
  -4  14  10    2.80    1.21
   2  14 -10    9.18    1.76
   0  14 -10   74.58    3.89
  -2  14 -10    5.16    1.38
  -4  14 -10   45.11    3.05
  -6  14 -10    0.09    2.94
 -10  14 -10   34.51    2.14
 -10  14 -10   31.94    2.33
  10  14  10   32.94    1.78
 -12  14 -10   72.66    3.37
  12  14  10   71.64    2.47
 -12  14 -10   71.29    3.06
  14  14  10   11.36    1.19
 -14  14 -10   13.61    1.72
  16  14  10   35.91    1.78
 -16  14 -10   34.62    2.29
  17  15 -10    2.05    1.61
  15  15 -10    0.98    1.59
 -15  15  10   -0.51    1.04
 -13  15  10    0.56    1.08
  13  15 -10    1.38    2.00
  13  15 -10    0.54    1.63
  11  15 -10    3.82    1.92
  11  15 -10    1.10    2.04
   9  15 -10  121.19    6.35
   9  15 -10  118.85    5.76
   7  15 -10  853.80   21.10
   7  15 -10  882.80   22.68
   3  15 -10  345.44   10.60
   1  15 -10   11.19    1.90
  -1  15 -10  241.42    8.04
  -7  15 -10   -0.48    2.94
  -9  15 -10  219.03    5.65
  -9  15 -10  220.13    6.29
  11  15  10   60.89    2.21
 -11  15 -10   60.71    3.08
 -11  15 -10   60.57    2.81
 -13  15 -10  206.02    6.06
 -15  15 -10   15.73    1.72
  16  16 -10    5.90    1.92
 -16  16  10    3.31    1.38
  14  16 -10    1.18    1.65
 -14  16  10    1.00    1.23
  12  16 -10    6.01    2.03
  12  16 -10    7.48    2.44
  10  16 -10   63.73    4.76
  10  16 -10   68.37    4.44
   8  16 -10  264.05    9.65
   8  16 -10  254.26    8.79
   6  16 -10  320.99   10.59
   6  16 -10  312.98    9.76
   4  16 -10  214.52    7.34
   4  16 -10  221.06    8.00
   2  16 -10  230.36    7.53
   2  16 -10  242.10    8.23
  -6  16 -10   86.07    3.65
  -6  16 -10   97.36    4.37
  -8  16 -10  270.00    7.25
  -8  16 -10  279.00    8.58
 -12  16 -10  111.25    4.22
 -14  16 -10  197.08    5.72
  17  17 -10    0.32    1.28
  15  17 -10    1.84    1.58
 -15  17  10   -0.13    1.16
  13  17 -10   15.23    2.59
  11  17 -10    2.86    1.87
  11  17 -10    2.73    1.64
   9  17 -10   33.52    3.26
   9  17 -10   33.33    3.52
   7  17 -10   19.73    2.61
   7  17 -10   21.65    2.93
   5  17 -10   14.56    2.39
   5  17 -10   18.30    2.36
   3  17 -10   10.00    1.99
   3  17 -10    7.59    1.69
   1  17  10    0.25    2.93
  -1  17 -10    1.07    3.76
  -1  17 -10    1.32    1.25
  -1  17 -10    6.56    1.59
  -5  17 -10   35.64    2.75
  -5  17 -10   28.09    2.18
  -7  17 -10   38.40    2.90
  -7  17 -10   36.72    2.55
  -9  17 -10   59.95    3.12
  -9  17 -10   62.47    3.55
 -11  17 -10    5.11    1.34
 -11  17 -10    1.57    3.53
 -13  17 -10   16.14    1.79
 -15  17 -10   22.61    1.89
  16  18 -10   10.06    1.96
  14  18 -10   29.61    3.07
  12  18 -10  120.34    5.80
  10  18 -10    1.10    1.37
  10  18 -10    1.37    1.63
   8  18 -10   69.02    4.29
   8  18 -10   69.25    4.62
   6  18 -10   35.60    3.33
   6  18 -10   39.59    3.21
   4  18 -10  115.32    5.60
   4  18 -10  119.56    5.28
   2  18 -10    5.70    1.80
  -2  18  10    0.22    3.03
   2  18 -10    6.59    1.57
  -2  18 -10    0.52    1.03
  -2  18 -10   -0.94    3.39
   2  18  10   -0.31    3.02
  -2  18 -10    0.34    1.17
  -6  18 -10    4.04    1.27
  -6  18 -10    5.58    1.54
  -6  18 -10   -0.63    3.37
  -8  18 -10   18.85    1.99
  -8  18 -10   17.59    2.20
 -12  18 -10   25.63    2.18
 -14  18 -10   33.78    2.19
  15  19 -10   -0.78    1.26
  13  19 -10   29.90    2.96
  11  19 -10   24.64    2.88
   9  19 -10   18.25    2.54
   9  19 -10   16.69    2.70
   7  19 -10   93.69    5.20
   7  19 -10   93.12    4.83
   5  19 -10    2.24    1.54
  -5  19  10   -0.25    3.06
   5  19 -10    5.51    1.63
   3  19 -10    1.02    1.41
   3  19 -10    1.56    1.21
  -3  19  10   -0.62    3.08
   1  19 -10  196.68    7.57
   1  19 -10  197.48    7.03
  -1  19 -10   13.48    2.03
  -1  19 -10   13.53    2.21
  -1  19 -10   -0.02    3.75
  -3  19 -10    0.21    3.83
   3  19  10   -1.05    2.85
  -5  19 -10    0.84    3.36
  -5  19 -10    4.43    1.28
  -5  19 -10    4.71    1.38
  -7  19 -10    6.85    1.38
  -7  19 -10    7.01    1.61
  -7  19 -10    0.59    3.31
  -9  19 -10   22.37    2.00
  -9  19 -10   21.10    2.30
 -11  19 -10   35.27    2.40
 -13  19 -10   90.39    3.44
  14  20 -10   11.42    2.05
  12  20 -10    5.51    1.73
  10  20 -10    1.35    1.42
   8  20 -10    1.50    1.42
  -8  20  10   -0.64    2.96
   6  20 -10    4.92    1.79
  -6  20  10   -0.58    2.79
   6  20 -10    7.02    1.79
  -4  20  10    0.04    3.09
   4  20 -10    1.93    1.27
   4  20 -10    0.67    1.36
   2  20 -10   30.58    3.04
   2  20 -10   32.25    2.86
  -2  20 -10   12.29    1.97
   2  20  10   -0.55    3.05
  -2  20 -10   10.81    2.11
  -2  20 -10   -1.65    3.17
   4  20  10    1.34    3.12
  -4  20 -10    2.38    1.28
  -4  20 -10   -0.13    3.41
  -6  20 -10    0.11    1.05
  -6  20 -10    0.92    3.45
  -6  20 -10    0.84    1.01
  -8  20 -10   38.27    2.86
  -8  20 -10   36.15    2.41
 -10  20 -10   75.57    3.84
 -10  20 -10   78.70    3.38
 -12  20 -10   57.20    2.74
  13  21 -10   18.07    2.33
  11  21 -10   11.30    2.09
   9  21 -10   -0.83    1.12
   7  21 -10    1.01    1.37
  -7  21  10   -0.81    3.19
   5  21 -10   33.83    3.26
   5  21 -10   36.90    3.03
   3  21 -10   11.52    2.04
   3  21 -10    9.90    2.07
  -1  21  10   -1.73    3.02
   1  21 -10    1.73    1.25
   1  21 -10    1.14    1.41
   1  21  10   -0.20    3.10
  -1  21 -10    7.86    1.91
  -1  21 -10   -0.37    3.60
  -1  21 -10    6.87    1.63
  -3  21 -10    1.40    1.14
   3  21  10    0.16    3.03
  -3  21 -10    0.94    3.68
  -7  21 -10    8.86    1.73
  -7  21 -10    9.60    1.47
  -9  21 -10   46.78    2.65
  -9  21 -10   45.20    2.99
 -11  21 -10   15.58    1.68
  10  22 -10   26.64    2.65
   8  22 -10   16.73    2.34
   6  22 -10    0.60    1.32
  -6  22  10   -1.84    2.97
   4  22 -10    1.33    1.27
  -4  22  10   -1.70    2.99
  -4  22 -10   -0.01    3.45
  -4  22 -10    5.87    1.55
  -8  22 -10    8.34    1.63
  -8  22 -10    0.61    3.15
   9  23 -10   32.30    2.76
  -7  23  10   -2.09    2.79
   7  23 -10    5.04    1.56
  -1  23 -10   -0.12    3.66
   1  23  10    0.00    3.31
  -5  23 -10   -0.14    3.25
  -5  23 -10    7.57    1.64
  -7  23 -10    1.27    3.37
   8  24 -10   23.02    2.37
  -6  24  10   -0.32    3.01
   6  24 -10   -0.54    1.12
   0  24  10   -0.42    3.19
   0  24 -10    5.36    1.55
  -5  25  10   -0.05    2.89
   5  25 -10    0.64    1.12
  -1  25  10    0.19    3.10
   1  25 -10    0.74    1.04
  -1  25 -10    1.08    3.45
  -1  25 -10    0.97    1.09
   1  25  10   -0.68    2.94
  -3  25 -10    9.46    1.64
 -22   0  11   -0.24    0.66
 -22   0  11    0.42    0.56
 -20   0  11    2.34    0.95
  18   0 -11    0.66    2.32
 -18   0  11   -1.23    0.49
 -18   0  11   -0.71    0.69
 -16   0  11    0.36    0.78
  16   0 -11    0.32    2.27
  14   0 -11    0.51    1.91
  12   0 -11    0.08    1.52
  10   0 -11   -0.46    1.26
 -10   0  11    1.28    0.56
  -8   0  11    0.65    0.54
  -6   0  11    0.17    0.42
   6   0 -11    0.81    0.85
   4   0 -11    5.08    1.33
   2   0 -11    3.94    1.13
  -2   0  11    0.31    0.41
   0   0 -11    0.50    0.78
  -2   0 -11    0.46    0.86
  -4   0 -11    0.40    0.65
  -4   0 -11    0.49    0.63
  -6   0 -11   -0.63    0.92
  -8   0 -11    0.55    0.80
  -8   0 -11    0.40    0.90
  -8   0 -11    0.41    0.52
 -10   0 -11    0.34    1.05
 -10   0 -11    0.15    0.55
 -12   0 -11    2.16    0.88
 -14   0 -11    0.91    0.85
 -16   0 -11    0.35    0.74
 -16   0 -11    0.00    0.78
 -18   0 -11    0.17    0.83
 -20   0 -11    0.28    0.74
 -21   1  11   78.59    2.95
 -21   1  11   79.01    2.42
 -21  -1  11   77.64    2.91
 -21  -1  11   79.52    2.45
  19   1 -11   54.07    5.59
 -19  -1  11   66.34    2.26
  19  -1 -11   61.00    5.74
 -19   1  11   63.70    2.74
 -19  -1  11   62.18    2.67
 -17   1  11   -0.02    0.57
  17  -1 -11    1.63    2.46
 -17   1  11    1.11    0.86
 -17  -1  11   -0.69    0.55
 -17  -1  11    0.74    0.79
  17   1 -11   -2.00    2.21
  15  -1 -11  112.55    6.83
  15   1 -11  108.18    6.85
  13  -1 -11   62.95    4.80
  13   1 -11   58.87    5.04
  11   1 -11   48.75    4.20
  11  -1 -11   54.90    4.08
   9  -1 -11  329.22   10.24
  -9   1  11  316.63    6.45
  -9  -1  11  312.69    6.49
   9   1 -11  308.49   10.46
  -7  -1  11   26.89    1.37
  -7   1  11   26.54    1.32
   7  -1 -11   24.82    2.32
   7   1 -11   27.01    2.57
   5   1 -11  208.19    7.99
  -5   1  11  215.23    4.48
  -5  -1  11  221.20    4.53
   5  -1 -11  210.23    7.80
  -3   1  11 1295.47   22.33
  -3  -1  11 1329.41   22.37
   3  -1 -11 1381.79   37.16
   3   1 -11 1291.45   37.28
   1   1 -11  436.51   13.60
  -1   1  11  419.07    7.87
  -1  -1  11  427.94    7.88
   1  -1 -11  441.10   13.39
  -1   1 -11  257.72    8.75
  -1  -1 -11  254.71    8.61
   1   1  11  246.54    5.01
  -3  -1 -11  342.45    7.66
  -3  -1 -11  396.09   11.85
  -3   1 -11  378.16   11.81
  -3   1 -11  354.64    7.80
  -5   1 -11   49.50    2.49
  -5  -1 -11   53.50    2.75
  -7   1 -11    2.64    0.70
  -7   1 -11    2.73    0.94
  -7  -1 -11    3.28    0.73
  -7   1 -11    3.16    1.07
  -7  -1 -11    3.06    1.16
  -9   1 -11  206.09    6.87
  -9  -1 -11  194.72    4.74
  -9  -1 -11  207.30    7.03
  -9   1 -11  197.35    4.81
  -9   1 -11  193.94    5.56
 -11  -1 -11  113.92    5.14
 -11   1 -11  118.63    3.62
 -11   1 -11  114.28    5.05
 -11  -1 -11  117.44    3.54
 -13   1 -11  864.89   15.76
 -13  -1 -11  852.25   15.63
 -15   1 -11    5.78    1.13
 -15  -1 -11    2.08    0.86
 -15   1 -11    3.41    0.96
 -15  -1 -11    2.31    0.92
 -17   1 -11    1.15    0.88
 -17  -1 -11    0.41    0.82
 -17   1 -11   -0.55    0.85
 -17  -1 -11    2.41    1.01
 -19  -1 -11   10.36    1.24
 -19   1 -11   10.40    1.25
 -22  -2  11   -0.21    0.67
 -22  -2  11   -0.12    0.53
 -22   2  11    0.26    0.55
 -22   2  11   -0.71    0.64
 -20  -2  11  141.48    3.43
 -20  -2  11  129.28    4.01
 -20   2  11  135.05    4.14
 -20   2  11  135.94    3.36
  18   2 -11    1.96    2.60
 -18  -2  11    2.62    0.72
 -18   2  11    3.12    0.97
 -18  -2  11    3.69    0.98
  18  -2 -11    3.81    2.63
 -18   2  11    1.82    0.67
  16   2 -11   75.20    6.33
  16  -2 -11   81.37    6.05
 -16  -2  11   74.37    3.01
 -16   2  11   79.19    3.06
  14  -2 -11    1.67    1.87
  14   2 -11    2.30    2.29
  12   2 -11   97.08    6.16
  12  -2 -11  103.58    5.53
  10  -2 -11   13.80    2.23
  10   2 -11   16.59    2.74
  -8  -2  11  339.98    6.72
   8   2 -11  313.67   10.57
  -8   2  11  338.20    6.60
  -6   2  11 1068.42   18.27
   6  -2 -11 1026.98   30.35
   6   2 -11 1081.21   31.03
  -6  -2  11 1070.47   18.34
   4  -2 -11  102.98    4.57
  -4  -2  11  101.73    2.64
  -4   2  11  104.68    2.62
   4   2 -11  109.84    5.08
   2   2 -11    9.40    1.57
  -2   2  11   13.23    0.88
  -2  -2  11    9.08    0.82
   0   2 -11 1565.44   43.57
   0  -2 -11 1564.34   43.25
  -2   2 -11  888.64   17.04
  -2   2 -11  936.83   26.36
  -6   2 -11  184.72    5.66
  -6   2 -11  167.74    4.91
  -8  -2 -11  401.75    8.00
  -8   2 -11  420.80   11.31
  -8   2 -11  408.58    8.18
  -8   2 -11  402.84    9.25
  -8  -2 -11  419.07   11.75
 -10   2 -11    1.25    1.06
 -10  -2 -11    0.63    0.55
 -10   2 -11    1.15    0.62
 -10  -2 -11    2.82    1.32
 -12  -2 -11  571.94   11.17
 -12   2 -11  596.88   11.41
 -14  -2 -11  167.83    4.68
 -14   2 -11  176.49    4.90
 -16  -2 -11    4.12    1.04
 -16   2 -11    5.65    1.11
 -16  -2 -11    4.85    1.01
 -16   2 -11    6.02    1.11
 -18   2 -11    0.78    0.85
 -18  -2 -11    0.29    0.82
 -20   2 -11    8.45    1.08
 -20  -2 -11    7.14    1.04
 -21  -3  11   -0.02    0.63
 -21   3  11   -0.59    0.77
 -21   3  11    1.01    0.66
 -21  -3  11   -0.84    0.71
 -19  -3  11   27.25    1.55
 -19   3  11   25.77    1.47
 -19  -3  11   27.41    1.86
 -19   3  11   27.37    1.92
 -17  -3  11   36.33    2.14
  17  -3 -11   30.82    4.36
 -17  -3  11   37.12    1.69
 -17   3  11   31.72    1.60
 -17   3  11   37.21    2.25
  17   3 -11   28.87    4.65
  15  -3 -11   31.62    3.93
  15   3 -11   31.86    4.58
  13   3 -11    6.95    2.66
  13  -3 -11    8.62    2.23
  11  -3 -11   24.03    2.76
  11   3 -11   18.86    3.21
  -9  -3  11    2.72    0.79
   9  -3 -11    5.63    1.63
   9   3 -11    2.09    2.00
  -7  -3  11    2.99    0.63
  -7   3  11    3.64    0.63
  -5   3  11   38.15    1.45
  -5  -3  11   39.86    1.59
   5   3 -11   38.67    2.96
  -3   3  11  297.36    5.74
   3  -3 -11  276.52    9.54
  -3  -3  11  291.89    5.74
   3   3 -11  297.70   10.32
  -1   3  11  285.01    5.45
  -1  -3  11  266.93    5.38
   1   3 -11  265.98    9.55
  -1   3 -11 1199.00   22.24
  -1   3 -11 1241.97   34.65
  -3   3 -11    3.92    0.93
  -3   3 -11    6.80    1.43
  -5   3 -11   13.20    1.38
  -7   3 -11    2.08    0.95
  -7   3 -11    1.96    0.74
  -7   3 -11    1.07    0.91
  -9  -3 -11    1.43    0.61
  -9   3 -11    0.08    0.81
  -9   3 -11   -0.44    0.63
  -9   3 -11    0.04    0.53
  -9  -3 -11    0.10    1.09
 -11   3 -11  217.50    7.58
 -11   3 -11  226.36    5.50
 -11  -3 -11  213.91    5.18
 -11  -3 -11  218.72    7.94
 -13   3 -11  200.86    5.30
 -13   3 -11  195.79    5.06
 -13  -3 -11  200.36    5.08
 -15   3 -11   39.88    2.14
 -15  -3 -11   38.15    2.05
 -15   3 -11   39.56    2.24
 -17   3 -11   -0.96    0.78
 -17  -3 -11   -0.39    0.79
 -17   3 -11    1.59    0.88
 -19  -3 -11    2.74    0.89
 -19   3 -11    2.45    0.88
 -22  -4  11   16.37    1.16
 -22   4  11   15.97    1.14
 -22   4  11   15.98    1.40
 -20  -4  11    4.96    0.86
 -20   4  11    4.80    1.07
 -20  -4  11    4.56    1.04
 -20   4  11    4.60    0.83
 -18   4  11   18.19    1.28
 -18  -4  11   19.08    1.33
 -18  -4  11   19.85    1.70
  18   4 -11   20.84    4.04
  18  -4 -11   20.95    3.83
 -18   4  11   19.70    1.72
 -16  -4  11    0.39    0.78
 -16   4  11   -0.34    0.72
  16  -4 -11   -0.63    1.75
  16   4 -11    0.00    2.53
  14  -4 -11   14.29    2.84
  14   4 -11   12.36    3.35
  12  -4 -11   67.15    4.46
  12   4 -11   62.50    5.29
  10   4 -11   24.22    3.38
  10  -4 -11   30.28    2.80
   8   4 -11   27.60    3.21
  -8  -4  11   36.48    1.70
  -8   4  11   35.31    1.56
  -6  -4  11   64.57    2.15
   6  -4 -11   59.75    3.33
  -6   4  11   62.91    1.96
  -4   4  11   12.07    0.97
  -4  -4  11   14.12    1.10
   4   4 -11   12.28    1.88
   4  -4 -11   13.08    1.53
  -2  -4  11   13.36    0.98
   2   4 -11   12.82    1.81
   2   4 -11   14.76    1.40
  -2   4  11   15.15    0.95
   0   4 -11  427.78    8.86
   0   4 -11  406.73   13.52
  -2   4 -11   16.17    2.04
  -2   4 -11   16.30    1.50
  -4   4 -11  204.18    5.24
  -6   4 -11    8.74    1.20
  -8   4 -11    1.48    0.60
  -8   4 -11    0.89    0.88
  -8   4 -11   -0.47    0.59
 -10   4 -11    8.66    1.16
 -10   4 -11   10.36    1.44
 -10   4 -11    8.78    1.66
 -10  -4 -11    7.49    1.77
 -12   4 -11    7.05    1.12
 -14   4 -11    7.96    1.24
 -16  -4 -11    0.32    0.78
 -16   4 -11   -0.86    0.72
 -16   4 -11    0.90    0.78
 -18  -4 -11   22.78    1.69
 -18   4 -11   22.68    1.68
 -20   4 -11   26.89    1.60
 -20  -4 -11   23.52    1.52
 -21  -5  11    7.45    0.90
 -21   5  11    8.89    1.20
 -21   5  11    6.36    0.84
 -19  -5  11   54.37    2.05
 -19   5  11   58.38    2.09
 -19   5  11   52.94    2.60
 -17  -5  11    0.40    0.60
 -17  -5  11   -0.10    0.79
  17   5 -11    1.93    2.97
  17  -5 -11   -0.06    2.17
 -17   5  11    0.06    0.59
 -17   5  11   -0.23    0.77
  15   5 -11   -1.66    2.30
  15  -5 -11   -0.54    1.59
  13   5 -11  372.19   14.07
  13  -5 -11  405.56   12.85
  11   5 -11   26.96    3.92
  11  -5 -11   32.94    3.18
   9   5 -11  279.81   10.24
  -7   5  11   72.64    2.21
   7   5 -11   63.05    4.22
  -5  -5  11   51.24    1.90
   5  -5 -11   41.64    2.79
  -5   5  11   50.27    1.75
  -3  -5  11   34.48    1.51
  -3   5  11   38.10    1.49
   3   5 -11   35.54    2.91
   1   5 -11  534.50   10.76
  -1  -5  11  543.79    9.84
   1   5 -11  517.52   16.77
  -1   5 -11   46.86    3.24
  -1   5 -11   46.07    2.21
  -3   5 -11    0.75    0.92
  -3   5 -11    2.21    0.86
  -5   5 -11   83.27    2.99
  -7   5 -11  350.47    8.05
  -7   5 -11  344.65    7.19
  -9   5 -11  140.42    3.93
  -9   5 -11  136.99    4.35
  -9   5 -11  138.76    5.31
 -11   5 -11   52.67    2.41
 -11  -5 -11   50.18    3.65
 -11   5 -11   56.95    3.47
 -13   5 -11    4.34    1.02
 -13   5 -11    3.18    0.94
 -15   5 -11    3.74    1.08
 -15  -5 -11    1.59    0.89
 -17   5 -11   70.25    2.66
 -17   5 -11   67.89    2.96
 -17  -5 -11   67.51    2.65
 -19  -5 -11   53.37    2.22
 -20   6  11    0.60    0.87
 -20  -6  11   -0.75    0.55
 -18   6  11    0.43    0.79
  18   6 -11    2.09    2.67
 -18  -6  11    0.33    0.59
  18  -6 -11   -0.29    1.97
  16   6 -11    6.01    3.13
 -16   6  11    4.47    1.14
 -16  -6  11    5.93    1.17
 -16  -6  11    5.18    0.86
  16  -6 -11    4.92    2.35
  14  -6 -11  183.96    7.99
  14   6 -11  159.59    8.90
  12   6 -11   58.21    5.53
  12  -6 -11   66.08    4.32
  10   6 -11  807.62   22.34
   8   6 -11   18.09    2.95
  -6   6  11  625.49   11.00
   6   6 -11  571.12   15.98
  -4   6  11    1.71    0.56
  -4  -6  11    1.59    0.64
  -2  -6  11  893.96   15.51
   2   6 -11  834.48   25.95
   2   6 -11  880.33   16.52
   0   6 -11  345.21    7.61
   0   6 -11  332.56   11.68
  -2   6 -11 1843.09   32.48
  -2   6 -11 1774.37   32.76
  -2   6 -11 1838.47   50.79
  -4   6 -11   98.56    3.30
  -6   6 -11 2992.30   52.91
  -6   6 -11 2948.33   47.57
  -8   6 -11  495.61   10.72
  -8   6 -11  491.40    9.59
 -10   6 -11   89.42    3.16
 -10   6 -11   94.70    3.55
 -12   6 -11   -0.24    0.67
 -12   6 -11   -0.48    0.59
 -14   6 -11   55.07    2.59
 -16   6 -11    1.25    0.84
 -16  -6 -11    0.87    0.80
 -18  -6 -11  167.33    4.10
  21   7 -11    6.85    2.14
 -21  -7  11    5.26    0.80
 -21   7  11    4.97    1.03
 -19   7  11   17.14    1.70
 -19  -7  11   16.53    1.26
 -17   7  11    1.58    0.89
 -17  -7  11    1.92    0.68
  17  -7 -11    1.22    1.87
  17   7 -11    0.49    2.58
 -15   7  11   21.04    1.81
  15   7 -11   22.11    4.31
  15  -7 -11   22.34    3.46
  13   7 -11  179.95    9.37
  13  -7 -11  214.21    8.57
  11   7 -11   77.38    5.84
   9   7 -11  188.90    8.25
   7   7 -11   43.79    4.15
  -5   7  11    0.97    0.57
   5   7 -11    1.70    1.35
   3   7 -11   13.28    1.50
   1   7 -11   78.93    3.05
  -1  -7  11   81.99    2.73
  -1   7 -11    1.46    0.64
  -1   7 -11    1.77    1.22
  -1   7 -11    3.11    0.97
  -3   7 -11  148.05    4.13
  -5   7 -11  106.30    3.53
  -7   7 -11   58.52    2.67
  -7   7 -11   54.30    2.27
  -9   7 -11  187.33    4.87
  -9   7 -11  197.62    5.51
 -11   7 -11   23.83    1.76
 -13   7 -11   13.78    1.51
[truncated: 433,483 more chars]
